# Supplementary material
Source: publisher figshare collection journal article supplement (https://gsajournals.figshare.com/ndownloader/files/28864890)
Supplement: Supplementary file 1 [file 28864890]

## Sheet: Table S5
Table S5: BLASTP annotation report of Spodoptera exigua proteins from the official gene set OGS v1.1 using local Arthropoda database.
Gene-protein_ID	sseqid	description	pident	length	mismatch	gapopen	qstart	qend	sstart	send	evalue	bitscore
maker-tulip_contig_65_pilon_pilon-augustus-gene-0.4-mRNA-1	XP_022832282.1 transmembrane protein 267 [Spodoptera litura]	XP_022832282.1	88.83	206	23	0	1	206	1	206	1e-118	345
maker-tulip_contig_65_pilon_pilon-augustus-gene-0.6-mRNA-1	JAT83930.1 hypothetical protein g.14400, partial [Pectinophora gossypiella]	JAT83930.1	100	102	0	0	1	102	73	174	2e-68	215
augustus_masked-tulip_contig_65_pilon_pilon-processed-gene-0.2-mRNA-1	XP_022832269.1 serine protease snake-like [Spodoptera litura]	XP_022832269.1	95.02	241	12	0	58	298	162	402	8e-169	484
maker-tulip_contig_65_pilon_pilon-augustus-gene-0.10-mRNA-1	XP_022833574.1 uncharacterized protein LOC111361407 isoform X4 [Spodoptera litura]	XP_022833574.1	95.12	82	4	0	50	131	92	173	3e-50	167
augustus_masked-tulip_contig_881_pilon_pilon-processed-gene-0.0-mRNA-1	PZC85021.1 hypothetical protein B5X24_HaOG203342 [Helicoverpa armigera]	PZC85021.1	68.89	569	167	5	26	589	20	583	0	751
maker-tulip_contig_881_pilon_pilon-augustus-gene-0.22-mRNA-1	XP_026740731.1 lutropin-choriogonadotropic hormone receptor-like [Trichoplusia ni]	XP_026740731.1	79.25	906	118	11	9	860	145	1034	0	1204
maker-tulip_contig_881_pilon_pilon-augustus-gene-0.26-mRNA-1	JAA81072.1 mitosis protein dim1 [Pararge aegeria]	JAA81072.1	100	142	0	0	1	142	1	142	7e-102	298
maker-tulip_contig_881_pilon_pilon-augustus-gene-0.28-mRNA-1	XP_022816147.1 E3 SUMO-protein ligase NSE2-like [Spodoptera litura]	XP_022816147.1	82.03	217	8	1	1	186	1	217	1e-123	358
maker-tulip_contig_881_pilon_pilon-augustus-gene-0.30-mRNA-1	XP_022816536.1 uncharacterized protein LOC111349604 isoform X1 [Spodoptera litura]	XP_022816536.1	53.98	113	50	2	1	112	1	112	9e-30	118
augustus_masked-tulip_contig_881_pilon_pilon-processed-gene-0.7-mRNA-1	XP_022816537.1 uncharacterized protein LOC111349604 isoform X2 [Spodoptera litura]	XP_022816537.1	42.48	113	49	2	15	112	21	132	1e-19	87
augustus_masked-tulip_contig_881_pilon_pilon-processed-gene-0.8-mRNA-1	XP_022816168.1 uncharacterized protein ZK1073.1 isoform X11 [Spodoptera litura]	XP_022816168.1	98.91	183	2	0	1	183	52	234	5e-130	379
augustus_masked-tulip_contig_881_pilon_pilon-processed-gene-0.9-mRNA-1	XP_022816169.1 retinol dehydrogenase 11-like [Spodoptera litura]	XP_022816169.1	96.65	328	11	0	1	328	1	328	0	662
maker-tulip_contig_881_pilon_pilon-augustus-gene-0.35-mRNA-1	APD13881.1 putative carboxylesterase CXE23 [Spodoptera litura]	APD13881.1	91.18	431	38	0	12	442	1	431	0	829
augustus_masked-tulip_contig_881_pilon_pilon-processed-gene-0.13-mRNA-1	RVE43416.1 hypothetical protein evm_011953 [Chilo suppressalis]	RVE43416.1	70.72	345	98	1	1	345	766	1107	6e-164	510
maker-tulip_contig_881_pilon_pilon-augustus-gene-0.37-mRNA-1	RVE43416.1 hypothetical protein evm_011953 [Chilo suppressalis]	RVE43416.1	45.3	181	84	4	15	181	567	746	7e-29	122
maker-tulip_contig_881_pilon_pilon-augustus-gene-0.39-mRNA-1	XP_026740730.1 transmembrane protein 131, partial [Trichoplusia ni]	XP_026740730.1	58.11	148	41	7	43	179	1371	1508	2e-23	108
augustus_masked-tulip_contig_881_pilon_pilon-processed-gene-0.17-mRNA-1	XP_022816146.1 rap1 GTPase-GDP dissociation stimulator 1-B [Spodoptera litura]	XP_022816146.1	94.2	293	17	0	1	293	1	293	0	566
augustus_masked-tulip_contig_881_pilon_pilon-processed-gene-0.18-mRNA-1	RVE48490.1 hypothetical protein evm_006801 [Chilo suppressalis]	RVE48490.1	48.98	245	120	2	3	247	5	244	5e-68	230
maker-tulip_contig_881_pilon_pilon-augustus-gene-0.43-mRNA-1	RXG67908.1 Tubulin alpha chain [Armadillidium vulgare]	RXG67908.1	76.01	396	76	2	1	378	28	422	0	609
augustus_masked-tulip_contig_881_pilon_pilon-processed-gene-0.20-mRNA-1	AXY04264.1 insulin-like precursor polypeptide AA [Spodoptera exigua]	AXY04264.1	100	89	0	0	1	89	1	89	8e-59	184
augustus_masked-tulip_contig_881_pilon_pilon-processed-gene-0.21-mRNA-1	XP_022816494.1 basic helix-loop-helix neural transcription factor TAP [Spodoptera litura]	XP_022816494.1	93.72	414	23	2	1	411	1	414	0	736
maker-tulip_contig_881_pilon_pilon-augustus-gene-0.32-mRNA-1	XP_022816168.1 uncharacterized protein ZK1073.1 isoform X11 [Spodoptera litura]	XP_022816168.1	92.54	67	5	0	3	69	285	351	3e-35	130
augustus_masked-tulip_contig_881_pilon_pilon-processed-gene-1.51-mRNA-1	ASO98046.1 cytochrome p450 CYP341B26 [Spodoptera exigua]	ASO98046.1	90.98	244	22	0	1	244	1	244	5e-157	461
maker-tulip_contig_881_pilon_pilon-augustus-gene-1.1-mRNA-1	XP_022816127.1 cytochrome P450 4V2-like [Spodoptera litura]	XP_022816127.1	76.02	513	96	5	14	525	14	500	0	775
maker-tulip_contig_881_pilon_pilon-augustus-gene-1.2-mRNA-1	XP_022816194.1 uncharacterized protein LOC111349331 [Spodoptera litura]	XP_022816194.1	89.55	335	35	0	368	702	556	890	0	629
maker-tulip_contig_881_pilon_pilon-augustus-gene-1.27-mRNA-1	ASN63843.1 cytochrome p450 CYP341B27, partial [Spodoptera exigua]	ASN63843.1	98.93	373	4	0	11	383	1	373	0	758
augustus_masked-tulip_contig_881_pilon_pilon-processed-gene-1.56-mRNA-1	XP_022816742.1 uncharacterized protein LOC111349745 [Spodoptera litura]	XP_022816742.1	82.72	1221	196	9	1	1209	1	1218	0	1963
augustus_masked-tulip_contig_881_pilon_pilon-processed-gene-1.57-mRNA-1	XP_026729834.1 probable palmitoyltransferase ZDHHC24 [Trichoplusia ni]	XP_026729834.1	65.89	258	87	1	10	267	11	267	2e-120	355
augustus_masked-tulip_contig_881_pilon_pilon-processed-gene-1.58-mRNA-1	XP_022822888.1 uncharacterized protein LOC111353912 [Spodoptera litura]	XP_022822888.1	62.75	247	72	3	1	242	165	396	5e-92	291
augustus_masked-tulip_contig_881_pilon_pilon-processed-gene-1.59-mRNA-1	XP_022816198.1 uncharacterized protein LOC111349337 [Spodoptera litura]	XP_022816198.1	92.94	807	42	2	1	793	1	806	0	1575
maker-tulip_contig_881_pilon_pilon-augustus-gene-1.33-mRNA-1	XP_022816375.1 cytochrome P450 4C1-like [Spodoptera litura]	XP_022816375.1	72.52	564	42	3	16	542	16	503	0	809
augustus_masked-tulip_contig_881_pilon_pilon-processed-gene-1.63-mRNA-1	XP_022816758.1 retinol dehydrogenase 11-like [Spodoptera litura]	XP_022816758.1	85.98	328	42	1	1	328	1	324	0	565
augustus_masked-tulip_contig_881_pilon_pilon-processed-gene-1.64-mRNA-1	XP_022816763.1 retinol dehydrogenase 13-like [Spodoptera litura]	XP_022816763.1	79.55	308	63	0	17	324	17	324	1e-173	495
augustus_masked-tulip_contig_881_pilon_pilon-processed-gene-1.65-mRNA-1	XP_022816763.1 retinol dehydrogenase 13-like [Spodoptera litura]	XP_022816763.1	88.4	293	34	0	2	294	31	323	0	520
augustus_masked-tulip_contig_881_pilon_pilon-processed-gene-1.66-mRNA-1	XP_022816359.1 retinol dehydrogenase 11-like [Spodoptera litura]	XP_022816359.1	94.22	329	19	0	1	329	1	329	0	620
augustus_masked-tulip_contig_881_pilon_pilon-processed-gene-1.67-mRNA-1	XP_022816305.1 cadherin-23 [Spodoptera litura]	XP_022816305.1	95.16	1820	59	2	1	1791	1	1820	0	3526
maker-tulip_contig_881_pilon_pilon-augustus-gene-1.41-mRNA-1	XP_022816773.1 uncharacterized protein LOC111349768 [Spodoptera litura]	XP_022816773.1	91.4	616	50	3	727	1341	64	677	0	1137
maker-tulip_contig_881_pilon_pilon-augustus-gene-1.43-mRNA-1	XP_022816193.1 proline-rich extensin-like protein EPR1 [Spodoptera litura]	XP_022816193.1	96.38	138	5	0	2	139	1	138	9e-46	179
augustus_masked-tulip_contig_881_pilon_pilon-processed-gene-1.70-mRNA-1	XP_022816393.1 abscisic acid and environmental stress-inducible protein-like [Spodoptera litura]	XP_022816393.1	92.59	81	6	0	12	92	4	84	3e-29	110
maker-tulip_contig_881_pilon_pilon-augustus-gene-1.44-mRNA-1	XP_022816672.1 neurotrophin 1 isoform X1 [Spodoptera litura]	XP_022816672.1	85.6	729	41	4	1	666	168	895	0	1246
augustus_masked-tulip_contig_881_pilon_pilon-processed-gene-1.72-mRNA-1	PCG63215.1 hypothetical protein B5V51_12743 [Heliothis virescens]	PCG63215.1	85.38	171	25	0	1	171	1	171	1e-104	307
maker-tulip_contig_881_pilon_pilon-augustus-gene-1.47-mRNA-1	XP_022815863.1 probable serine/threonine-protein kinase dyrk2 [Spodoptera litura]	XP_022815863.1	91.67	1284	75	3	9	1262	59	1340	0	2286
maker-tulip_contig_881_pilon_pilon-augustus-gene-1.49-mRNA-1	XP_021192677.1 THAP domain-containing protein 1-like [Helicoverpa armigera]	XP_021192677.1	87.27	165	21	0	1	165	1	165	5e-105	308
maker-tulip_contig_79_pilon_pilon-augustus-gene-0.7-mRNA-1	XP_022816473.1 guanine nucleotide-binding protein-like 3 homolog [Spodoptera litura]	XP_022816473.1	93.97	564	19	2	1	549	1	564	0	1073
augustus_masked-tulip_contig_79_pilon_pilon-processed-gene-0.1-mRNA-1	PNF14081.1 hypothetical protein B7P43_G02146 [Cryptotermes secundus]	PNF14081.1	35.19	216	136	4	1	215	227	439	4e-34	134
augustus_masked-tulip_contig_79_pilon_pilon-processed-gene-0.2-mRNA-1	XP_022816383.1 uncharacterized protein LOC111349492 [Spodoptera litura]	XP_022816383.1	99.63	271	1	0	1	271	1	271	0	560
augustus_masked-tulip_contig_79_pilon_pilon-processed-gene-0.4-mRNA-1	XP_023945752.1 uncharacterized protein LOC112051378 [Bicyclus anynana]	XP_023945752.1	54.45	292	128	3	1	288	299	589	1e-95	315
maker-tulip_contig_79_pilon_pilon-augustus-gene-0.10-mRNA-1	XP_021196965.1 small conductance calcium-activated potassium channel protein isoform X6 [Helicoverpa armigera]	XP_021196965.1	99.64	556	2	0	1	556	294	849	0	1160
maker-tulip_contig_470_pilon_pilon-augustus-gene-0.3-mRNA-1	XP_022837264.1 uncharacterized protein LOC111364588 [Spodoptera litura]	XP_022837264.1	97.75	89	2	0	22	110	124	212	7e-48	171
augustus_masked-tulip_contig_470_pilon_pilon-processed-gene-0.1-mRNA-1	PZC72260.1 hypothetical protein B5X24_HaOG211657 [Helicoverpa armigera]	PZC72260.1	87.05	533	35	5	4	502	261	793	0	934
maker-tulip_contig_470_pilon_pilon-augustus-gene-0.8-mRNA-1	AKJ54523.1 lysozyme-like protein 1 [Spodoptera exigua]	AKJ54523.1	77.6	183	27	2	5	173	1	183	9e-81	247
maker-tulip_contig_470_pilon_pilon-augustus-gene-0.12-mRNA-1	XP_026735473.1 lysozyme-like [Trichoplusia ni]	XP_026735473.1	80.22	91	14	1	40	126	53	143	2e-44	151
maker-tulip_contig_470_pilon_pilon-augustus-gene-0.14-mRNA-1	XP_022837263.1 lysozyme [Spodoptera litura]	XP_022837263.1	97.47	79	2	0	1	79	1	79	1e-50	165
augustus_masked-tulip_contig_128_pilon_pilon-processed-gene-0.17-mRNA-1	XP_022834525.1 prostatic acid phosphatase-like [Spodoptera litura]	XP_022834525.1	94.96	119	6	0	107	225	267	385	3e-72	234
maker-tulip_contig_128_pilon_pilon-augustus-gene-0.2-mRNA-1	PCG80074.1 hypothetical protein B5V51_11497 [Heliothis virescens]	PCG80074.1	60.86	373	72	3	6	304	5	377	8e-152	441
augustus_masked-tulip_contig_128_pilon_pilon-processed-gene-0.19-mRNA-1	XP_026761098.1 uncharacterized protein LOC113520037 [Galleria mellonella]	XP_026761098.1	45.85	253	125	2	45	285	54	306	5e-71	232
maker-tulip_contig_128_pilon_pilon-augustus-gene-0.5-mRNA-1	XP_022834526.1 uncharacterized protein LOC111362190 [Spodoptera litura]	XP_022834526.1	94.67	150	8	0	15	164	606	755	8e-73	241
augustus_masked-tulip_contig_128_pilon_pilon-processed-gene-0.21-mRNA-1	XP_022834526.1 uncharacterized protein LOC111362190 [Spodoptera litura]	XP_022834526.1	85.88	531	69	5	1	529	4	530	0	823
maker-tulip_contig_128_pilon_pilon-augustus-gene-0.7-mRNA-1	XP_022834524.1 prostatic acid phosphatase-like [Spodoptera litura]	XP_022834524.1	74.87	386	85	2	1	377	1	383	0	606
maker-tulip_contig_128_pilon_pilon-augustus-gene-0.9-mRNA-1	XP_026736436.1 calpain-D [Trichoplusia ni]	XP_026736436.1	87.35	735	83	9	1	731	135	863	0	1267
augustus_masked-tulip_contig_580_pilon_pilon-processed-gene-0.0-mRNA-1	RVE50885.1 hypothetical protein evm_004452 [Chilo suppressalis]	RVE50885.1	52.94	170	54	2	154	300	366	532	1e-50	186
maker-tulip_contig_659_pilon_pilon-augustus-gene-0.9-mRNA-1	XP_022828705.1 uncharacterized protein LOC111358052 [Spodoptera litura]	XP_022828705.1	83.46	260	27	3	1	245	1	259	7e-142	408
augustus_masked-tulip_contig_659_pilon_pilon-processed-gene-0.1-mRNA-1	XP_022828617.1 m7GpppX diphosphatase [Spodoptera litura]	XP_022828617.1	76.85	337	23	2	1	282	1	337	2e-179	508
augustus_masked-tulip_contig_659_pilon_pilon-processed-gene-0.2-mRNA-1	PCG70133.1 hypothetical protein B5V51_3330 [Heliothis virescens]	PCG70133.1	81.41	425	72	2	1	425	1	418	0	716
augustus_masked-tulip_contig_659_pilon_pilon-processed-gene-0.3-mRNA-1	XP_022828702.1 neurotrimin-like isoform X1 [Spodoptera litura]	XP_022828702.1	76.42	212	21	1	1	183	164	375	3e-106	323
augustus_masked-tulip_contig_659_pilon_pilon-processed-gene-0.6-mRNA-1	XP_021197103.1 pleckstrin homology-like domain family B member 2 isoform X3 [Helicoverpa armigera]	XP_021197103.1	85.27	1195	91	10	1	1116	1	1189	0	1924
maker-tulip_contig_659_pilon_pilon-augustus-gene-0.19-mRNA-1	XP_022828619.1 calponin homology domain-containing protein DDB_G0272472 isoform X1 [Spodoptera litura]	XP_022828619.1	92.41	303	23	0	1	303	113	415	0	557
maker-tulip_contig_659_pilon_pilon-augustus-gene-0.26-mRNA-1	XP_022828655.1 uncharacterized protein LOC111358014 [Spodoptera litura]	XP_022828655.1	90.84	251	19	1	1	247	1	251	5e-134	391
maker-tulip_contig_659_pilon_pilon-augustus-gene-0.16-mRNA-1	XP_022828795.1 uncharacterized protein LOC111358116 [Spodoptera litura]	XP_022828795.1	59.62	104	11	1	1	104	1	73	7e-32	115
augustus_masked-tulip_contig_659_pilon_pilon-processed-gene-1.3-mRNA-1	XP_021195732.1 uncharacterized protein LOC110380165 [Helicoverpa armigera]	XP_021195732.1	54.11	316	144	1	1	315	1	316	9e-124	368
maker-tulip_contig_659_pilon_pilon-augustus-gene-1.34-mRNA-1	XP_022828663.1 monoacylglycerol lipase ABHD12-like [Spodoptera litura]	XP_022828663.1	57.27	330	28	3	13	254	45	349	9e-116	346
augustus_masked-tulip_contig_659_pilon_pilon-processed-gene-1.5-mRNA-1	XP_022823908.1 uncharacterized protein LOC111354594 [Spodoptera litura]	XP_022823908.1	94.12	51	3	0	26	76	555	605	1e-21	96.3
augustus_masked-tulip_contig_659_pilon_pilon-processed-gene-1.6-mRNA-1	XP_021195728.1 homeobox protein OTX1 isoform X2 [Helicoverpa armigera]	XP_021195728.1	100	84	0	0	1	84	1	84	2e-49	171
maker-tulip_contig_659_pilon_pilon-augustus-gene-1.37-mRNA-1	XP_022828701.1 homeotic protein ocelliless isoform X2 [Spodoptera litura]	XP_022828701.1	97.55	408	10	0	1	408	81	488	0	805
maker-tulip_contig_659_pilon_pilon-augustus-gene-1.39-mRNA-1	XP_022828605.1 thioredoxin-related transmembrane protein 1-like [Spodoptera litura]	XP_022828605.1	84.86	317	9	2	1	291	1	304	0	542
augustus_masked-tulip_contig_659_pilon_pilon-processed-gene-1.12-mRNA-1	XP_022828632.1 protein lines [Spodoptera litura]	XP_022828632.1	97.77	807	18	0	1	807	1	807	0	1620
augustus_masked-tulip_contig_659_pilon_pilon-processed-gene-1.13-mRNA-1	XP_022828544.1 puff-specific protein Bx42 [Spodoptera litura]	XP_022828544.1	84.8	171	3	1	1	148	1	171	2e-90	283
maker-tulip_contig_659_pilon_pilon-augustus-gene-1.42-mRNA-1	XP_026746234.1 puff-specific protein Bx42 [Trichoplusia ni]	XP_026746234.1	73.9	387	20	5	14	319	171	557	0	544
maker-tulip_contig_659_pilon_pilon-augustus-gene-1.45-mRNA-1	XP_022828746.1 prostamide/prostaglandin F synthase-like [Spodoptera litura]	XP_022828746.1	91.48	176	5	1	1	166	1	176	2e-111	325
augustus_masked-tulip_contig_659_pilon_pilon-processed-gene-1.15-mRNA-1	XP_022828654.1 ommochrome-binding protein-like [Spodoptera litura]	XP_022828654.1	93.62	298	19	0	1	298	1	298	0	577
maker-tulip_contig_659_pilon_pilon-augustus-gene-1.47-mRNA-1	XP_022828787.1 uncharacterized protein LOC111358110 isoform X2 [Spodoptera litura]	XP_022828787.1	51.09	137	33	4	1	105	19	153	2e-28	109
maker-tulip_contig_659_pilon_pilon-augustus-gene-1.48-mRNA-1	XP_022828744.1 mediator of RNA polymerase II transcription subunit 15-like [Spodoptera litura]	XP_022828744.1	93.78	370	20	2	1	370	3	369	0	620
augustus_masked-tulip_contig_659_pilon_pilon-processed-gene-1.19-mRNA-1	XP_022824815.1 uncharacterized protein LOC111355267 [Spodoptera litura]	XP_022824815.1	44.9	196	98	5	2	187	649	844	1e-41	157
augustus_masked-tulip_contig_659_pilon_pilon-processed-gene-1.20-mRNA-1	XP_023938864.1 uncharacterized protein LOC112046472 [Bicyclus anynana]	XP_023938864.1	44.44	414	166	5	305	657	1	411	5e-99	319
maker-tulip_contig_659_pilon_pilon-augustus-gene-1.49-mRNA-1	XP_022828602.1 pro-resilin-like isoform X1 [Spodoptera litura]	XP_022828602.1	81.82	110	5	2	1	102	126	228	5e-51	169
augustus_masked-tulip_contig_659_pilon_pilon-processed-gene-1.1-mRNA-1	XP_022828596.1 pro-resilin-like [Spodoptera litura]	XP_022828596.1	81.79	549	49	5	24	521	1	549	0	756
augustus_masked-tulip_contig_659_pilon_pilon-processed-gene-1.2-mRNA-1	XP_022828600.1 spherulin-2A-like [Spodoptera litura]	XP_022828600.1	83.39	289	48	0	1	289	1	289	1e-179	507
maker-tulip_contig_659_pilon_pilon-augustus-gene-1.55-mRNA-1	XP_022828489.1 serine/threonine-protein kinase Genghis Khan [Spodoptera litura]	XP_022828489.1	61.9	231	26	3	65	233	1875	2105	2e-61	219
augustus_masked-tulip_contig_659_pilon_pilon-processed-gene-1.23-mRNA-1	XP_022828489.1 serine/threonine-protein kinase Genghis Khan [Spodoptera litura]	XP_022828489.1	97.64	212	5	0	1	212	1055	1266	5e-138	436
augustus_masked-tulip_contig_659_pilon_pilon-processed-gene-1.24-mRNA-1	XP_022828489.1 serine/threonine-protein kinase Genghis Khan [Spodoptera litura]	XP_022828489.1	81.97	893	48	10	4	820	90	945	0	1356
maker-tulip_contig_659_pilon_pilon-augustus-gene-1.60-mRNA-1	XP_021198971.1 serine/threonine-protein kinase mrck-1-like, partial [Helicoverpa armigera]	XP_021198971.1	81.08	37	5	1	1	35	1	37	1e-11	63.2
maker-tulip_contig_659_pilon_pilon-augustus-gene-1.115-mRNA-1	XP_022828608.1 uncharacterized protein LOC111357989 [Spodoptera litura]	XP_022828608.1	98.78	245	3	0	3	247	87	331	9e-170	482
maker-tulip_contig_659_pilon_pilon-augustus-gene-1.117-mRNA-1	BAM19091.1 thioredoxin-2 [Papilio polytes]	BAM19091.1	96.49	57	2	0	14	70	1	57	5e-32	115
augustus_masked-tulip_contig_659_pilon_pilon-processed-gene-1.27-mRNA-1	XP_022828831.1 uncharacterized protein LOC111358136 [Spodoptera litura]	XP_022828831.1	67.44	737	203	15	1	720	35	751	0	880
augustus_masked-tulip_contig_659_pilon_pilon-processed-gene-1.28-mRNA-1	XP_026746241.1 uncharacterized protein LOC113507593 [Trichoplusia ni]	XP_026746241.1	42.55	141	66	5	3	142	907	1033	6e-22	100
augustus_masked-tulip_contig_659_pilon_pilon-processed-gene-1.29-mRNA-1	PCG69516.1 hypothetical protein B5V51_3998, partial [Heliothis virescens]	PCG69516.1	72.14	140	39	0	1	140	666	805	3e-54	193
augustus_masked-tulip_contig_659_pilon_pilon-processed-gene-1.30-mRNA-1	XP_021197020.1 uncharacterized protein LOC110381137 isoform X1 [Helicoverpa armigera]	XP_021197020.1	63.3	109	39	1	1	109	535	642	1e-37	144
augustus_masked-tulip_contig_659_pilon_pilon-processed-gene-1.31-mRNA-1	PCG69516.1 hypothetical protein B5V51_3998, partial [Heliothis virescens]	PCG69516.1	59.85	523	194	12	1	513	8	524	0	568
maker-tulip_contig_659_pilon_pilon-augustus-gene-1.122-mRNA-1	XP_022828796.1 nephrin-like isoform X1 [Spodoptera litura]	XP_022828796.1	69.57	92	7	1	1	71	876	967	1e-30	121
maker-tulip_contig_659_pilon_pilon-augustus-gene-1.123-mRNA-1	PZC72851.1 hypothetical protein B5X24_HaOG210512 [Helicoverpa armigera]	PZC72851.1	72.96	540	30	4	57	480	251	790	0	762
augustus_masked-tulip_contig_19_pilon_pilon-processed-gene-0.3-mRNA-1	XP_022912085.1 uncharacterized protein LOC111423061 [Onthophagus taurus]	XP_022912085.1	42.73	337	176	1	18	354	69	388	4e-101	323
maker-tulip_contig_19_pilon_pilon-augustus-gene-0.0-mRNA-1	XP_021192267.1 facilitated trehalose transporter Tret1-like [Helicoverpa armigera]	XP_021192267.1	76.39	449	91	3	1	436	47	493	0	670
maker-tulip_contig_70_pilon_pilon-augustus-gene-0.0-mRNA-1	XP_022828498.1 uncharacterized protein LOC111357933 [Spodoptera litura]	XP_022828498.1	82.05	156	4	1	418	573	184	315	1e-69	252
maker-tulip_contig_70_pilon_pilon-augustus-gene-0.1-mRNA-1	XP_022828498.1 uncharacterized protein LOC111357933 [Spodoptera litura]	XP_022828498.1	77.91	344	29	2	19	362	419	715	6e-170	505
augustus_masked-tulip_contig_70_pilon_pilon-processed-gene-0.52-mRNA-1	XP_022829834.1 diphosphoinositol polyphosphate phosphohydrolase 2 [Spodoptera litura]	XP_022829834.1	100	156	0	0	1	156	1	156	1e-111	323
maker-tulip_contig_70_pilon_pilon-augustus-gene-0.11-mRNA-1	XP_022830386.1 uncharacterized protein C18orf8 [Spodoptera litura]	XP_022830386.1	96.32	163	6	0	1	163	1	163	8e-112	339
maker-tulip_contig_70_pilon_pilon-augustus-gene-0.14-mRNA-1	XP_026487282.1 regulator of MON1-CCZ1 complex [Vanessa tameamea]	XP_026487282.1	61.32	212	72	2	10	219	415	618	5e-78	256
maker-tulip_contig_70_pilon_pilon-augustus-gene-0.19-mRNA-1	XP_022829785.1 nucleolar protein 11 [Spodoptera litura]	XP_022829785.1	94.85	583	30	0	1	583	1	583	0	1153
maker-tulip_contig_70_pilon_pilon-augustus-gene-0.20-mRNA-1	XP_022829786.1 chitobiosyldiphosphodolichol beta-mannosyltransferase [Spodoptera litura]	XP_022829786.1	93.36	437	29	0	1	437	1	437	0	862
maker-tulip_contig_70_pilon_pilon-augustus-gene-0.27-mRNA-1	XP_022830130.1 uncharacterized protein C7orf26 [Spodoptera litura]	XP_022830130.1	97.3	407	10	1	1	406	1	407	0	819
augustus_masked-tulip_contig_70_pilon_pilon-processed-gene-0.58-mRNA-1	XP_022830385.1 serine/threonine-protein kinase SMG1 [Spodoptera litura]	XP_022830385.1	95.15	2249	88	1	1	2228	1	2249	0	4450
maker-tulip_contig_70_pilon_pilon-augustus-gene-0.31-mRNA-1	XP_022830385.1 serine/threonine-protein kinase SMG1 [Spodoptera litura]	XP_022830385.1	95.07	588	29	0	1	588	2267	2854	0	1157
maker-tulip_contig_70_pilon_pilon-augustus-gene-0.32-mRNA-1	XP_026733968.1 serine/threonine-protein kinase SMG1 [Trichoplusia ni]	XP_026733968.1	47.24	398	131	6	86	449	3020	3372	2e-77	273
maker-tulip_contig_70_pilon_pilon-augustus-gene-0.35-mRNA-1	PZC70859.1 hypothetical protein B5X24_HaOG214757 [Helicoverpa armigera]	PZC70859.1	58.93	56	23	0	116	171	19	74	2e-12	67.4
augustus_masked-tulip_contig_70_pilon_pilon-processed-gene-0.63-mRNA-1	XP_026737713.1 uncharacterized protein LOC113500956 [Trichoplusia ni]	XP_026737713.1	52.89	242	102	3	1	239	92	324	2e-85	270
maker-tulip_contig_70_pilon_pilon-augustus-gene-0.37-mRNA-1	XP_022829829.1 disks large-associated protein 5 isoform X1 [Spodoptera litura]	XP_022829829.1	79.92	792	122	7	1	768	1	779	0	1150
maker-tulip_contig_70_pilon_pilon-augustus-gene-0.40-mRNA-1	XP_022829828.1 uncharacterized protein LOC111358778 [Spodoptera litura]	XP_022829828.1	90.11	1406	130	3	1	1406	1	1397	0	2529
augustus_masked-tulip_contig_70_pilon_pilon-processed-gene-0.66-mRNA-1	XP_017494147.1 PREDICTED: uncharacterized protein LOC108382272 [Rhagoletis zephyria]	XP_017494147.1	37.24	239	140	5	1	236	203	434	7e-40	153
augustus_masked-tulip_contig_70_pilon_pilon-processed-gene-0.67-mRNA-1	XP_026744701.1 uncharacterized protein LOC113506040 [Trichoplusia ni]	XP_026744701.1	55.77	208	86	5	11	217	20	222	6e-72	237
augustus_masked-tulip_contig_70_pilon_pilon-processed-gene-0.68-mRNA-1	XP_022829789.1 alcohol dehydrogenase class-3 [Spodoptera litura]	XP_022829789.1	99.2	376	3	0	1	376	1	376	0	765
augustus_masked-tulip_contig_70_pilon_pilon-processed-gene-0.69-mRNA-1	XP_026733414.1 RNA-binding region-containing protein 3-like [Trichoplusia ni]	XP_026733414.1	77.7	435	91	3	1	431	1	433	0	691
maker-tulip_contig_70_pilon_pilon-augustus-gene-0.43-mRNA-1	XP_022829790.1 NHP2-like protein 1 [Spodoptera litura]	XP_022829790.1	100	130	0	0	1	130	1	130	4e-89	265
maker-tulip_contig_70_pilon_pilon-augustus-gene-0.45-mRNA-1	XP_022830301.1 cleavage and polyadenylation specificity factor subunit 4 [Spodoptera litura]	XP_022830301.1	97.95	293	6	0	1	293	1	293	0	603
augustus_masked-tulip_contig_70_pilon_pilon-processed-gene-0.72-mRNA-1	XP_022830131.1 ribosomal RNA-processing protein 7 homolog A [Spodoptera litura]	XP_022830131.1	90.88	274	25	0	1	274	7	280	2e-164	468
maker-tulip_contig_70_pilon_pilon-augustus-gene-0.48-mRNA-1	XP_022830085.1 histamine H2 receptor [Spodoptera litura]	XP_022830085.1	99.01	403	4	0	1	403	1	403	0	825
augustus_masked-tulip_contig_806_pilon_pilon-processed-gene-0.7-mRNA-1	XP_022834040.1 uncharacterized protein LOC111361843 [Spodoptera litura]	XP_022834040.1	67.36	144	38	3	1	140	1	139	4e-46	176
maker-tulip_contig_806_pilon_pilon-augustus-gene-0.1-mRNA-1	XP_026332281.1 uncharacterized protein LOC113239467 [Hyposmocoma kahamanoa]	XP_026332281.1	56.36	275	117	2	520	792	345	618	3e-92	319
maker-tulip_contig_806_pilon_pilon-augustus-gene-0.4-mRNA-1	XP_022826006.1 collagen alpha-2(I) chain-like [Spodoptera litura]	XP_022826006.1	69.62	293	59	2	1	263	54	346	2e-141	411
maker-tulip_contig_806_pilon_pilon-augustus-gene-0.6-mRNA-1	XP_022826397.1 suppressor of lurcher protein 1-like [Spodoptera litura]	XP_022826397.1	94.77	440	3	1	5	424	173	612	0	860
maker-tulip_contig_806_pilon_pilon-augustus-gene-1.8-mRNA-1	XP_022826208.1 allergen Api m 6-like [Spodoptera litura]	XP_022826208.1	92.68	82	6	0	1	82	1	82	7e-50	161
maker-tulip_contig_806_pilon_pilon-augustus-gene-1.10-mRNA-1	XP_022826229.1 venom peptide BmKAPI-like [Spodoptera litura]	XP_022826229.1	90.32	155	6	1	1	155	1	146	2e-94	280
maker-tulip_contig_806_pilon_pilon-augustus-gene-1.12-mRNA-1	XP_022826141.1 allergen Api m 6-like [Spodoptera litura]	XP_022826141.1	80.9	89	17	0	1	89	1	89	8e-47	154
maker-tulip_contig_806_pilon_pilon-augustus-gene-1.15-mRNA-1	XP_022826186.1 zonadhesin-like [Spodoptera litura]	XP_022826186.1	88.36	378	33	1	7	373	1560	1937	0	651
augustus_masked-tulip_contig_806_pilon_pilon-processed-gene-1.4-mRNA-1	XP_022826186.1 zonadhesin-like [Spodoptera litura]	XP_022826186.1	80.39	1581	171	8	1	1471	1	1552	0	2437
maker-tulip_contig_806_pilon_pilon-augustus-gene-1.20-mRNA-1	XP_022825882.1 cadherin-99C isoform X4 [Spodoptera litura]	XP_022825882.1	87.15	1331	50	5	67	1280	147	1473	0	2250
maker-tulip_contig_806_pilon_pilon-augustus-gene-2.16-mRNA-1	XP_022826176.1 DNA ligase 3 [Spodoptera litura]	XP_022826176.1	84.12	932	99	3	1	883	1	932	0	1605
augustus_masked-tulip_contig_806_pilon_pilon-processed-gene-2.2-mRNA-1	XP_026322133.1 uncharacterized protein LOC113231814, partial [Hyposmocoma kahamanoa]	XP_026322133.1	67.92	106	34	0	2	107	12	117	7e-49	164
maker-tulip_contig_806_pilon_pilon-augustus-gene-2.18-mRNA-1	XP_022826180.1 uncharacterized protein LOC111356150 [Spodoptera litura]	XP_022826180.1	63.16	76	28	0	7	82	16	91	5e-26	102
augustus_masked-tulip_contig_806_pilon_pilon-processed-gene-2.4-mRNA-1	XP_022826183.1 uncharacterized protein LOC111356152 [Spodoptera litura]	XP_022826183.1	65.28	72	25	0	1	72	12	83	7e-20	84.7
maker-tulip_contig_806_pilon_pilon-augustus-gene-2.20-mRNA-1	XP_022826181.1 uncharacterized protein LOC111356151 [Spodoptera litura]	XP_022826181.1	78.75	80	17	0	1	80	1	80	5e-36	128
maker-tulip_contig_806_pilon_pilon-augustus-gene-2.24-mRNA-1	XP_022826178.1 calmodulin-beta [Spodoptera litura]	XP_022826178.1	95.78	237	10	0	1	237	1	237	6e-164	463
augustus_masked-tulip_contig_806_pilon_pilon-processed-gene-2.7-mRNA-1	XP_022826179.1 uncharacterized protein LOC111356149 [Spodoptera litura]	XP_022826179.1	94.16	137	8	0	20	156	1	137	1e-74	229
augustus_masked-tulip_contig_806_pilon_pilon-processed-gene-2.8-mRNA-1	XP_022816262.1 uncharacterized protein At4g04980-like [Spodoptera litura]	XP_022816262.1	68.83	77	24	0	40	116	161	237	3e-28	115
maker-tulip_contig_806_pilon_pilon-augustus-gene-2.26-mRNA-1	XP_022826335.1 solute carrier family 25 member 40-like isoform X1 [Spodoptera litura]	XP_022826335.1	85.17	344	10	1	1	303	1	344	0	605
maker-tulip_contig_806_pilon_pilon-augustus-gene-2.28-mRNA-1	XP_022826099.1 putative peptidyl-tRNA hydrolase PTRHD1 isoform X3 [Spodoptera litura]	XP_022826099.1	93.6	125	8	0	1	125	1	125	1e-81	245
maker-tulip_contig_806_pilon_pilon-augustus-gene-2.29-mRNA-1	XP_021197745.1 suppressor of lurcher protein 1 [Helicoverpa armigera]	XP_021197745.1	98.17	218	4	0	1	218	17	234	1e-157	450
augustus_masked-tulip_contig_806_pilon_pilon-processed-gene-2.12-mRNA-1	XP_022826177.1 suppressor of lurcher protein 1 [Spodoptera litura]	XP_022826177.1	97.62	42	1	0	11	52	271	312	1e-19	91.3
augustus_masked-tulip_contig_806_pilon_pilon-processed-gene-2.13-mRNA-1	XP_022826327.1 NADP-dependent malic enzyme-like [Spodoptera litura]	XP_022826327.1	76.42	530	93	1	1	498	1	530	0	859
maker-tulip_contig_806_pilon_pilon-augustus-gene-2.31-mRNA-1	XP_022826334.1 NADP-dependent malic enzyme [Spodoptera litura]	XP_022826334.1	97.39	612	16	0	16	627	7	618	0	1250
augustus_masked-tulip_contig_806_pilon_pilon-processed-gene-2.15-mRNA-1	XP_022826337.1 U6 snRNA-associated Sm-like protein LSm8 [Spodoptera litura]	XP_022826337.1	100	96	0	0	1	96	1	96	2e-60	189
augustus_masked-tulip_contig_137_pilon_pilon-processed-gene-0.30-mRNA-1	XP_022822872.1 trypsin-1-like [Spodoptera litura]	XP_022822872.1	95.74	282	10	1	1	282	23	302	0	558
augustus_masked-tulip_contig_137_pilon_pilon-processed-gene-0.31-mRNA-1	XP_022822822.1 protein msta [Spodoptera litura]	XP_022822822.1	97.22	431	12	0	1	431	1	431	0	894
maker-tulip_contig_137_pilon_pilon-augustus-gene-0.2-mRNA-1	XP_022831794.1 N-acetylglucosamine-6-sulfatase-like isoform X2 [Spodoptera litura]	XP_022831794.1	93.33	375	25	0	1	375	1	375	0	731
maker-tulip_contig_137_pilon_pilon-augustus-gene-0.9-mRNA-1	XP_022832204.1 vacuole membrane protein 1-like [Spodoptera litura]	XP_022832204.1	96.61	236	6	1	28	263	226	459	5e-162	468
augustus_masked-tulip_contig_137_pilon_pilon-processed-gene-0.34-mRNA-1	PCG71327.1 hypothetical protein B5V51_1990, partial [Heliothis virescens]	PCG71327.1	91.03	78	7	0	13	90	1	78	2e-39	135
maker-tulip_contig_137_pilon_pilon-augustus-gene-0.11-mRNA-1	XP_022832205.1 28S ribosomal protein S15, mitochondrial [Spodoptera litura]	XP_022832205.1	93.09	275	19	0	1	275	1	275	0	525
maker-tulip_contig_137_pilon_pilon-augustus-gene-0.12-mRNA-1	XP_022823260.1 zinc finger protein 277 [Spodoptera litura]	XP_022823260.1	96.06	431	17	0	1	431	1	431	0	860
maker-tulip_contig_137_pilon_pilon-augustus-gene-0.15-mRNA-1	XP_022823030.1 uncharacterized protein LOC111354007 [Spodoptera litura]	XP_022823030.1	86.93	566	18	2	5	514	3	568	0	995
maker-tulip_contig_137_pilon_pilon-augustus-gene-0.17-mRNA-1	XP_022822873.1 protein msta-like [Spodoptera litura]	XP_022822873.1	92.12	520	41	0	1	520	1	520	0	1009
maker-tulip_contig_137_pilon_pilon-augustus-gene-0.18-mRNA-1	XP_022822837.1 protein msta-like isoform X1 [Spodoptera litura]	XP_022822837.1	93.98	515	30	1	1	515	7	520	0	1015
maker-tulip_contig_137_pilon_pilon-augustus-gene-0.23-mRNA-1	XP_022831978.1 DNA cross-link repair 1A protein isoform X1 [Spodoptera litura]	XP_022831978.1	77.2	592	59	6	1	519	1	589	0	872
maker-tulip_contig_137_pilon_pilon-augustus-gene-0.25-mRNA-1	XP_013146572.1 PREDICTED: SH3 and PX domain-containing protein 2B isoform X1 [Papilio polytes]	XP_013146572.1	61.65	339	40	8	1	252	1	336	1e-127	375
maker-tulip_contig_137_pilon_pilon-augustus-gene-0.26-mRNA-1	XP_022831818.1 double C2-like domain-containing protein beta [Spodoptera litura]	XP_022831818.1	96.94	294	4	1	1	289	65	358	0	591
maker-tulip_contig_632_pilon_pilon-augustus-gene-0.0-mRNA-1	XP_022832229.1 uncharacterized protein LOC111360516 [Spodoptera litura]	XP_022832229.1	67.83	230	36	1	13	204	62	291	3e-107	320
maker-tulip_contig_632_pilon_pilon-augustus-gene-0.3-mRNA-1	XP_022832264.1 cold shock domain-containing protein E1 [Spodoptera litura]	XP_022832264.1	98.42	822	10	1	1	822	1	819	0	1670
maker-tulip_contig_632_pilon_pilon-augustus-gene-0.7-mRNA-1	XP_022832363.1 WD repeat-containing protein 47 isoform X1 [Spodoptera litura]	XP_022832363.1	98.15	540	10	0	1	540	1	540	0	1100
maker-tulip_contig_632_pilon_pilon-augustus-gene-0.9-mRNA-1	XP_022832366.1 WD repeat-containing protein 47 isoform X2 [Spodoptera litura]	XP_022832366.1	96.41	223	8	0	1	223	1	223	7e-151	442
maker-tulip_contig_632_pilon_pilon-augustus-gene-0.10-mRNA-1	XP_022832367.1 WD repeat-containing protein 47 isoform X3 [Spodoptera litura]	XP_022832367.1	92.29	545	6	2	1	509	1	545	0	1023
maker-tulip_contig_632_pilon_pilon-augustus-gene-0.17-mRNA-1	XP_022832521.1 peptidoglycan recognition protein-like isoform X2 [Spodoptera litura]	XP_022832521.1	78.81	269	43	3	5	261	54	320	3e-153	440
augustus_masked-tulip_contig_632_pilon_pilon-processed-gene-0.36-mRNA-1	XP_022832522.1 peptidoglycan-recognition protein SC2-like isoform X3 [Spodoptera litura]	XP_022832522.1	88.24	187	22	0	1	187	119	305	3e-125	365
augustus_masked-tulip_contig_632_pilon_pilon-processed-gene-0.38-mRNA-1	XP_022832560.1 UNC93-like protein [Spodoptera litura]	XP_022832560.1	98.44	449	6	1	25	472	1	449	0	912
maker-tulip_contig_632_pilon_pilon-augustus-gene-0.25-mRNA-1	XP_022832629.1 dnaJ homolog subfamily C member 11 [Spodoptera litura]	XP_022832629.1	96.13	568	22	0	1	568	1	568	0	1157
maker-tulip_contig_632_pilon_pilon-augustus-gene-0.29-mRNA-1	XP_022833096.1 uncharacterized protein LOC111361008 [Spodoptera litura]	XP_022833096.1	85.25	61	9	0	7	67	301	361	2e-25	104
augustus_masked-tulip_contig_632_pilon_pilon-processed-gene-1.1-mRNA-1	XP_022835329.1 uncharacterized protein LOC111362815 [Spodoptera litura]	XP_022835329.1	69.23	286	88	0	1	286	1	286	7e-151	439
augustus_masked-tulip_contig_632_pilon_pilon-processed-gene-1.2-mRNA-1	XP_026746206.1 uncharacterized protein LOC113507549, partial [Trichoplusia ni]	XP_026746206.1	52.94	187	74	2	1	173	95	281	2e-59	200
maker-tulip_contig_632_pilon_pilon-augustus-gene-1.16-mRNA-1	XP_022832925.1 forkhead box protein L2-like isoform X3 [Spodoptera litura]	XP_022832925.1	96.67	240	8	0	2	241	65	304	2e-158	459
maker-tulip_contig_632_pilon_pilon-augustus-gene-1.17-mRNA-1	XP_022832924.1 forkhead box protein L2-like isoform X2 [Spodoptera litura]	XP_022832924.1	97.48	119	2	1	10	127	336	454	6e-73	235
maker-tulip_contig_632_pilon_pilon-augustus-gene-1.20-mRNA-1	XP_022832482.1 DENN domain-containing protein 1A-like isoform X1 [Spodoptera litura]	XP_022832482.1	97.92	770	16	0	1	770	1	770	0	1558
augustus_masked-tulip_contig_632_pilon_pilon-processed-gene-1.8-mRNA-1	XP_022832726.1 major facilitator superfamily domain-containing protein 6 [Spodoptera litura]	XP_022832726.1	92.09	354	28	0	1	354	1	354	0	694
augustus_masked-tulip_contig_632_pilon_pilon-processed-gene-1.9-mRNA-1	RVE41043.1 hypothetical protein evm_014307 [Chilo suppressalis]	RVE41043.1	40.82	534	274	11	51	572	129	632	7e-111	358
maker-tulip_contig_632_pilon_pilon-augustus-gene-1.25-mRNA-1	XP_022832922.1 cyclic nucleotide-gated cation channel subunit A-like isoform X2 [Spodoptera litura]	XP_022832922.1	97.83	692	15	0	1	692	1	692	0	1410
augustus_masked-tulip_contig_632_pilon_pilon-processed-gene-1.14-mRNA-1	XP_013195491.1 PREDICTED: mucin-2-like [Amyelois transitella]	XP_013195491.1	65.48	168	58	0	6	173	222	389	1e-66	233
maker-tulip_contig_632_pilon_pilon-augustus-gene-1.18-mRNA-1	XP_022832925.1 forkhead box protein L2-like isoform X3 [Spodoptera litura]	XP_022832925.1	100	30	0	0	85	114	422	451	6e-11	66.6
maker-tulip_contig_632_pilon_pilon-augustus-gene-1.19-mRNA-1	XP_026738563.1 uncharacterized protein LOC113501432 isoform X3 [Trichoplusia ni]	XP_026738563.1	91.8	61	5	0	1	61	46	106	2e-31	119
maker-tulip_contig_632_pilon_pilon-augustus-gene-2.0-mRNA-1	OWR42763.1 iroquois protein [Danaus plexippus plexippus]	OWR42763.1	92.86	42	3	0	41	82	47	88	3e-19	83.6
maker-tulip_contig_632_pilon_pilon-augustus-gene-2.1-mRNA-1	XP_022832604.1 homeobox protein araucan-like isoform X3 [Spodoptera litura]	XP_022832604.1	100	303	0	0	6	308	193	495	0	634
maker-tulip_contig_632_pilon_pilon-augustus-gene-2.4-mRNA-1	XP_021192932.1 homeobox protein caupolican isoform X1 [Helicoverpa armigera]	XP_021192932.1	100	270	0	0	1	270	164	433	0	545
maker-tulip_contig_632_pilon_pilon-augustus-gene-2.6-mRNA-1	XP_022836905.1 uncharacterized protein LOC111364283 [Spodoptera litura]	XP_022836905.1	78.26	115	14	1	75	178	50	164	5e-55	186
augustus_masked-tulip_contig_632_pilon_pilon-processed-gene-2.9-mRNA-1	XP_022836905.1 uncharacterized protein LOC111364283 [Spodoptera litura]	XP_022836905.1	94.51	91	5	0	62	152	74	164	2e-53	186
augustus_masked-tulip_contig_632_pilon_pilon-processed-gene-2.16-mRNA-1	XP_022832487.1 ankyrin repeat domain-containing protein SOWAHB isoform X3 [Spodoptera litura]	XP_022832487.1	90.66	257	24	0	1	257	1	257	8e-150	439
augustus_masked-tulip_contig_632_pilon_pilon-processed-gene-2.20-mRNA-1	PZC75992.1 hypothetical protein B5X24_HaOG205243 [Helicoverpa armigera]	PZC75992.1	83.52	91	11	1	1	91	1	87	7e-42	143
maker-tulip_contig_632_pilon_pilon-augustus-gene-2.7-mRNA-1	XP_022832487.1 ankyrin repeat domain-containing protein SOWAHB isoform X3 [Spodoptera litura]	XP_022832487.1	90.67	75	0	1	1	75	471	538	5e-37	137
maker-tulip_contig_632_pilon_pilon-augustus-gene-3.20-mRNA-1	XP_022833144.1 N(G),N(G)-dimethylarginine dimethylaminohydrolase 1 [Spodoptera litura]	XP_022833144.1	83.71	307	9	1	1	307	1	266	0	514
maker-tulip_contig_632_pilon_pilon-augustus-gene-3.23-mRNA-1	XP_022833082.1 glutamate receptor 1-like [Spodoptera litura]	XP_022833082.1	91.55	698	20	2	1	662	183	877	0	1317
maker-tulip_contig_632_pilon_pilon-augustus-gene-3.27-mRNA-1	XP_017485477.1 PREDICTED: gamma-aminobutyric acid receptor subunit beta-like, partial [Rhagoletis zephyria]	XP_017485477.1	96.19	105	4	0	44	148	23	127	1e-70	218
augustus_masked-tulip_contig_632_pilon_pilon-processed-gene-3.3-mRNA-1	KPJ00610.1 Gamma-aminobutyric acid receptor subunit beta [Papilio xuthus]	KPJ00610.1	96.19	341	12	1	1	341	1	340	0	684
maker-tulip_contig_632_pilon_pilon-augustus-gene-3.36-mRNA-1	XP_022833124.1 JNK-interacting protein 1 isoform X1 [Spodoptera litura]	XP_022833124.1	99.55	443	2	0	1	443	1	443	0	923
augustus_masked-tulip_contig_632_pilon_pilon-processed-gene-3.6-mRNA-1	PCG72738.1 hypothetical protein B5V51_516, partial [Heliothis virescens]	PCG72738.1	97.3	37	1	0	24	60	47	83	2e-15	73.2
maker-tulip_contig_632_pilon_pilon-augustus-gene-3.39-mRNA-1	XP_022832972.1 glycerol kinase [Spodoptera litura]	XP_022832972.1	92.71	521	8	2	1	498	1	514	0	981
maker-tulip_contig_632_pilon_pilon-augustus-gene-3.43-mRNA-1	XP_022833174.1 glutamate receptor 1-like [Spodoptera litura]	XP_022833174.1	91.1	730	21	1	8	693	120	849	0	1370
augustus_masked-tulip_contig_632_pilon_pilon-processed-gene-3.11-mRNA-1	XP_022831335.1 uncharacterized protein LOC111359874 [Spodoptera litura]	XP_022831335.1	45.57	237	127	2	9	244	79	314	8e-73	239
augustus_masked-tulip_contig_632_pilon_pilon-processed-gene-3.12-mRNA-1	JAT80258.1 hypothetical protein g.1945, partial [Pectinophora gossypiella]	JAT80258.1	51.22	82	38	2	1	80	205	286	3e-18	84
augustus_masked-tulip_contig_632_pilon_pilon-processed-gene-3.13-mRNA-1	XP_026734721.1 activity-regulated cytoskeleton associated protein 2-like [Trichoplusia ni]	XP_026734721.1	60.45	268	90	4	1	257	1	263	1e-101	314
augustus_masked-tulip_contig_632_pilon_pilon-processed-gene-3.14-mRNA-1	PCG72738.1 hypothetical protein B5V51_516, partial [Heliothis virescens]	PCG72738.1	100	37	0	0	24	60	47	83	8e-16	74.3
maker-tulip_contig_632_pilon_pilon-augustus-gene-3.45-mRNA-1	XP_022832894.1 UDP-N-acetylglucosamine--peptide N-acetylglucosaminyltransferase 110 kDa subunit-like isoform X1 [Spodoptera litura]	XP_022832894.1	90.19	826	46	1	1	791	1	826	0	1552
maker-tulip_contig_632_pilon_pilon-augustus-gene-3.49-mRNA-1	XP_022832700.1 tryptophan 5-hydroxylase 1 [Spodoptera litura]	XP_022832700.1	95.5	111	4	1	2	112	428	537	2e-65	216
augustus_masked-tulip_contig_632_pilon_pilon-processed-gene-3.17-mRNA-1	XP_022832700.1 tryptophan 5-hydroxylase 1 [Spodoptera litura]	XP_022832700.1	98.48	198	3	0	1	198	1	198	1e-138	408
augustus_masked-tulip_contig_632_pilon_pilon-processed-gene-3.18-mRNA-1	XP_022832453.1 gamma-aminobutyric acid receptor subunit beta-like [Spodoptera litura]	XP_022832453.1	100	463	0	0	1	463	37	499	0	958
maker-tulip_contig_632_pilon_pilon-augustus-gene-3.57-mRNA-1	XP_022832245.1 sodium-dependent proline transporter-like [Spodoptera litura]	XP_022832245.1	64.62	359	43	3	1	276	263	620	1e-143	427
maker-tulip_contig_632_pilon_pilon-augustus-gene-3.58-mRNA-1	XP_022832245.1 sodium-dependent proline transporter-like [Spodoptera litura]	XP_022832245.1	57.89	95	6	1	1	95	1	61	5e-23	100
maker-tulip_contig_632_pilon_pilon-augustus-gene-3.63-mRNA-1	ASO98029.1 cytochrome p450 CYP305B1 [Spodoptera exigua]	ASO98029.1	99.77	442	1	0	1	442	46	487	0	913
maker-tulip_contig_134_pilon_pilon-augustus-gene-0.0-mRNA-1	XP_022825387.1 uncharacterized protein LOC111355616 isoform X1 [Spodoptera litura]	XP_022825387.1	56.06	132	27	2	1	101	1	132	2e-31	122
augustus_masked-tulip_contig_150_pilon_pilon-processed-gene-0.0-mRNA-1	XP_022815070.1 zinc finger protein ZFMSA12A-like isoform X1 [Spodoptera litura]	XP_022815070.1	63.64	209	57	6	1	196	1	203	5e-71	235
maker-tulip_contig_150_pilon_pilon-augustus-gene-0.4-mRNA-1	XP_022815071.1 zinc finger protein 93-like isoform X2 [Spodoptera litura]	XP_022815071.1	68.13	364	63	3	4	316	95	456	4e-172	496
maker-tulip_contig_150_pilon_pilon-augustus-gene-0.7-mRNA-1	XP_022814732.1 uncharacterized protein LOC111348374 [Spodoptera litura]	XP_022814732.1	98.84	344	4	0	42	385	21	364	0	707
augustus_masked-tulip_contig_740_pilon_pilon-processed-gene-0.0-mRNA-1	XP_021186669.1 uncharacterized protein LOC110373661 [Helicoverpa armigera]	XP_021186669.1	51.97	304	80	9	1	238	24	327	1e-88	279
maker-tulip_contig_740_pilon_pilon-augustus-gene-0.15-mRNA-1	XP_022837431.1 glycine-rich protein DOT1-like [Spodoptera litura]	XP_022837431.1	92.05	365	18	2	42	405	1	355	0	531
augustus_masked-tulip_contig_740_pilon_pilon-processed-gene-0.2-mRNA-1	XP_021183516.1 uncharacterized protein K02A2.6-like [Helicoverpa armigera]	XP_021183516.1	74.73	91	21	1	1	91	790	878	4e-26	109
maker-tulip_contig_740_pilon_pilon-augustus-gene-0.17-mRNA-1	XP_022837212.1 UDP-glucuronosyltransferase 2B15-like [Spodoptera litura]	XP_022837212.1	89.06	512	55	1	27	538	1	511	0	964
augustus_masked-tulip_contig_740_pilon_pilon-processed-gene-0.5-mRNA-1	PCG70195.1 hypothetical protein B5V51_3267, partial [Heliothis virescens]	PCG70195.1	54.55	110	44	4	37	142	69	176	2e-25	107
maker-tulip_contig_740_pilon_pilon-augustus-gene-0.19-mRNA-1	XP_022837211.1 uncharacterized protein LOC111364537 [Spodoptera litura]	XP_022837211.1	57.76	1011	399	4	4	988	6	1014	0	1202
maker-tulip_contig_740_pilon_pilon-augustus-gene-0.20-mRNA-1	ANI21997.1 UDP-glycosyltransferase 33V3 [Spodoptera exigua]	ANI21997.1	88.7	522	5	2	1	468	1	522	0	929
maker-tulip_contig_740_pilon_pilon-augustus-gene-0.21-mRNA-1	ANI21995.1 UDP-glycosyltransferase 33V1 [Spodoptera exigua]	ANI21995.1	91.7	506	25	1	1	489	1	506	0	944
augustus_masked-tulip_contig_740_pilon_pilon-processed-gene-0.10-mRNA-1	ANI21989.1 UDP-glycosyltransferase 33F5 [Spodoptera exigua]	ANI21989.1	92.35	510	33	1	396	905	7	510	0	953
maker-tulip_contig_740_pilon_pilon-augustus-gene-0.25-mRNA-1	ANI21991.1 UDP-glycosyltransferase 33F7 [Spodoptera exigua]	ANI21991.1	97.04	169	5	0	1	169	1	169	3e-104	340
maker-tulip_contig_740_pilon_pilon-augustus-gene-0.26-mRNA-1	XP_022837180.1 UDP-glucuronosyltransferase 2B10-like [Spodoptera litura]	XP_022837180.1	83.17	523	56	2	1	493	1	521	0	879
maker-tulip_contig_740_pilon_pilon-augustus-gene-0.124-mRNA-1	XP_022837214.1 uncharacterized protein LOC111364540 [Spodoptera litura]	XP_022837214.1	50	52	26	0	28	79	43	94	4e-10	59.7
maker-tulip_contig_740_pilon_pilon-augustus-gene-0.123-mRNA-1	XP_022837214.1 uncharacterized protein LOC111364540 [Spodoptera litura]	XP_022837214.1	71.15	52	15	0	35	86	43	94	5e-19	84
augustus_masked-tulip_contig_740_pilon_pilon-processed-gene-1.37-mRNA-1	XP_022837629.1 vitellin-degrading protease-like [Spodoptera litura]	XP_022837629.1	63.02	192	21	1	4	145	73	264	1e-76	238
maker-tulip_contig_740_pilon_pilon-augustus-gene-1.2-mRNA-1	ANI21986.1 UDP-glycosyltransferase 33B14 [Spodoptera exigua]	ANI21986.1	87.26	518	10	3	1	462	1	518	0	895
augustus_masked-tulip_contig_740_pilon_pilon-processed-gene-1.40-mRNA-1	ANI21987.1 UDP-glycosyltransferase 33B15 [Spodoptera exigua]	ANI21987.1	97.51	241	6	0	1	241	1	241	2e-168	485
maker-tulip_contig_740_pilon_pilon-augustus-gene-1.4-mRNA-1	ANI21987.1 UDP-glycosyltransferase 33B15 [Spodoptera exigua]	ANI21987.1	97.27	256	7	0	1	256	261	516	2e-179	514
maker-tulip_contig_740_pilon_pilon-augustus-gene-1.5-mRNA-1	ANI21988.1 UDP-glycosyltransferase 33B16 [Spodoptera exigua]	ANI21988.1	95.92	515	11	1	1	505	1	515	0	1010
maker-tulip_contig_740_pilon_pilon-augustus-gene-1.6-mRNA-1	ANI21993.1 UDP-glycosyltransferase 33J3 [Spodoptera exigua]	ANI21993.1	91.89	518	5	1	1	481	1	518	0	959
augustus_masked-tulip_contig_740_pilon_pilon-processed-gene-2.0-mRNA-1	OWR43207.1 gag protein [Danaus plexippus plexippus]	OWR43207.1	76.06	284	60	2	1	277	14	296	2e-123	375
maker-tulip_contig_740_pilon_pilon-augustus-gene-2.19-mRNA-1	XP_022837429.1 WD repeat-containing protein 48 homolog [Spodoptera litura]	XP_022837429.1	88.73	648	2	2	1	577	1	648	0	1163
maker-tulip_contig_740_pilon_pilon-augustus-gene-2.21-mRNA-1	XP_022837310.1 uncharacterized protein LOC111364618 [Spodoptera litura]	XP_022837310.1	95.32	278	13	0	1	278	1	278	0	559
maker-tulip_contig_740_pilon_pilon-augustus-gene-2.23-mRNA-1	XP_021198559.1 photoreceptor-specific nuclear receptor [Helicoverpa armigera]	XP_021198559.1	60.61	330	57	5	1	271	138	453	2e-118	357
augustus_masked-tulip_contig_740_pilon_pilon-processed-gene-2.6-mRNA-1	PZC74948.1 hypothetical protein B5X24_HaOG206881 [Helicoverpa armigera]	PZC74948.1	80.92	283	52	1	275	557	3658	3938	5e-152	506
augustus_masked-tulip_contig_740_pilon_pilon-processed-gene-2.7-mRNA-1	XP_026331489.1 ATP-dependent DNA helicase PIF1-like [Hyposmocoma kahamanoa]	XP_026331489.1	82.39	142	25	0	1	142	1	142	2e-82	254
maker-tulip_contig_740_pilon_pilon-augustus-gene-2.25-mRNA-1	XP_022837207.1 lachesin-like [Spodoptera litura]	XP_022837207.1	99.4	167	1	0	1	167	1	167	9e-120	351
augustus_masked-tulip_contig_740_pilon_pilon-processed-gene-2.9-mRNA-1	PCG68177.1 hypothetical protein B5V51_5520, partial [Heliothis virescens]	PCG68177.1	56.78	199	85	1	3	200	64	262	3e-77	249
augustus_masked-tulip_contig_740_pilon_pilon-processed-gene-2.10-mRNA-1	PCG63543.1 hypothetical protein B5V51_12121 [Heliothis virescens]	PCG63543.1	66.22	74	25	0	1	74	1	74	8e-28	114
augustus_masked-tulip_contig_740_pilon_pilon-processed-gene-2.11-mRNA-1	PCG71029.1 hypothetical protein B5V51_2346 [Heliothis virescens]	PCG71029.1	76.69	296	58	3	47	342	21	305	2e-151	440
maker-tulip_contig_740_pilon_pilon-augustus-gene-2.26-mRNA-1	XP_022837368.1 meiosis-specific coiled-coil domain-containing protein MEIOC-like isoform X1 [Spodoptera litura]	XP_022837368.1	92.35	575	11	1	1	542	1	575	0	1082
maker-tulip_contig_740_pilon_pilon-augustus-gene-2.28-mRNA-1	XP_014368431.1 PREDICTED: uncharacterized protein LOC106718776 [Papilio machaon]	XP_014368431.1	42.68	478	195	9	1	412	1	465	6e-116	360
augustus_masked-tulip_contig_740_pilon_pilon-processed-gene-2.14-mRNA-1	XP_013192398.1 PREDICTED: uncharacterized protein LOC106136402 [Amyelois transitella]	XP_013192398.1	40.44	136	70	3	66	190	57	192	6e-16	83.2
augustus_masked-tulip_contig_740_pilon_pilon-processed-gene-2.15-mRNA-1	XP_022837409.1 serine protease inhibitor 77Ba-like [Spodoptera litura]	XP_022837409.1	95.91	416	17	0	1	416	1	416	0	835
augustus_masked-tulip_contig_740_pilon_pilon-processed-gene-2.16-mRNA-1	XP_022837418.1 putative ATP-dependent RNA helicase DHX30 [Spodoptera litura]	XP_022837418.1	67.89	218	7	2	1	155	519	736	2e-83	280
maker-tulip_contig_740_pilon_pilon-augustus-gene-2.30-mRNA-1	PCG79464.1 hypothetical protein B5V51_472 [Heliothis virescens]	PCG79464.1	88.42	95	11	0	19	113	384	478	2e-52	180
augustus_masked-tulip_contig_740_pilon_pilon-processed-gene-2.18-mRNA-1	XP_022837418.1 putative ATP-dependent RNA helicase DHX30 [Spodoptera litura]	XP_022837418.1	85.45	110	16	0	32	141	44	153	1e-60	209
augustus_masked-tulip_contig_490_pilon_pilon-processed-gene-0.0-mRNA-1	XP_023939390.1 uncharacterized protein LOC112046816 [Bicyclus anynana]	XP_023939390.1	41.06	414	191	8	8	414	7	374	4e-104	323
maker-tulip_contig_490_pilon_pilon-augustus-gene-0.10-mRNA-1	XP_022823350.1 neuropeptides capa receptor-like [Spodoptera litura]	XP_022823350.1	98.35	182	3	0	17	198	187	368	4e-130	380
augustus_masked-tulip_contig_490_pilon_pilon-processed-gene-0.2-mRNA-1	XP_022823458.1 host cell factor 1 [Spodoptera litura]	XP_022823458.1	98.93	840	8	1	1	839	1	840	0	1672
maker-tulip_contig_490_pilon_pilon-augustus-gene-0.11-mRNA-1	XP_022823521.1 prothoracicostatic peptide-like isoform X1 [Spodoptera litura]	XP_022823521.1	96.85	254	6	1	1	254	1	252	1e-168	478
augustus_masked-tulip_contig_490_pilon_pilon-processed-gene-0.4-mRNA-1	KOB68075.1 hypothetical protein OBRU01_19060 [Operophtera brumata]	KOB68075.1	64.77	88	31	0	2	89	371	458	5e-37	138
augustus_masked-tulip_contig_490_pilon_pilon-processed-gene-0.5-mRNA-1	PZC71610.1 hypothetical protein B5X24_HaOG212888 [Helicoverpa armigera]	PZC71610.1	56.98	602	255	2	11	612	67	664	0	738
maker-tulip_contig_490_pilon_pilon-augustus-gene-0.14-mRNA-1	XP_011557214.1 PREDICTED: uncharacterized protein LOC105388069 isoform X2 [Plutella xylostella]	XP_011557214.1	68.3	530	165	2	233	759	1	530	0	753
augustus_masked-tulip_contig_490_pilon_pilon-processed-gene-0.9-mRNA-1	XP_022823555.1 cytochrome b5-like [Spodoptera litura]	XP_022823555.1	92.5	40	3	0	1	40	1	40	6e-19	82.8
maker-tulip_contig_490_pilon_pilon-augustus-gene-1.0-mRNA-1	XP_022823899.1 tRNA:m(4)X modification enzyme TRM13 homolog [Spodoptera litura]	XP_022823899.1	95.11	184	9	0	10	193	7	190	3e-126	364
maker-tulip_contig_490_pilon_pilon-augustus-gene-1.1-mRNA-1	XP_011552039.1 PREDICTED: tRNA:m(4)X modification enzyme TRM13 homolog [Plutella xylostella]	XP_011552039.1	50.37	272	93	6	1	267	196	430	9e-75	244
maker-tulip_contig_490_pilon_pilon-augustus-gene-1.4-mRNA-1	PCG73599.1 hypothetical protein B5V51_14646 [Heliothis virescens]	PCG73599.1	56.69	471	142	11	1	453	1	427	6e-144	439
augustus_masked-tulip_contig_490_pilon_pilon-processed-gene-1.53-mRNA-1	PZC73661.1 hypothetical protein B5X24_HaOG208994 [Helicoverpa armigera]	PZC73661.1	60.61	66	2	1	70	135	522	563	1e-13	76.3
maker-tulip_contig_490_pilon_pilon-augustus-gene-1.5-mRNA-1	XP_026736754.1 E3 ubiquitin-protein ligase TRIM33 [Trichoplusia ni]	XP_026736754.1	65.68	373	63	10	1	325	656	1011	1e-140	433
maker-tulip_contig_490_pilon_pilon-augustus-gene-1.10-mRNA-1	XP_022823894.1 glucosamine-6-phosphate isomerase isoform X1 [Spodoptera litura]	XP_022823894.1	100	278	0	0	1	278	1	278	0	578
maker-tulip_contig_490_pilon_pilon-augustus-gene-1.12-mRNA-1	JAB67228.1 Charged multivesicular body protein [Anoplophora glabripennis]	JAB67228.1	62.24	286	48	4	1	285	1	227	2e-107	321
maker-tulip_contig_490_pilon_pilon-augustus-gene-1.14-mRNA-1	XP_022823891.1 zinc finger protein 330 homolog [Spodoptera litura]	XP_022823891.1	100	47	0	0	1	47	1	47	3e-22	99.8
maker-tulip_contig_490_pilon_pilon-augustus-gene-1.15-mRNA-1	XP_022823891.1 zinc finger protein 330 homolog [Spodoptera litura]	XP_022823891.1	90.37	135	12	1	17	150	132	266	5e-65	211
augustus_masked-tulip_contig_490_pilon_pilon-processed-gene-1.60-mRNA-1	XP_013144156.1 PREDICTED: rho GTPase-activating protein 26 [Papilio polytes]	XP_013144156.1	96.36	55	2	0	1	55	1	55	6e-29	109
augustus_masked-tulip_contig_490_pilon_pilon-processed-gene-1.61-mRNA-1	XP_022823892.1 rho GTPase-activating protein 26 [Spodoptera litura]	XP_022823892.1	100	65	0	0	1	65	66	130	2e-37	138
augustus_masked-tulip_contig_490_pilon_pilon-processed-gene-1.62-mRNA-1	RVE44999.1 hypothetical protein evm_010363 [Chilo suppressalis]	RVE44999.1	69.29	127	14	1	17	118	21	147	4e-51	178
augustus_masked-tulip_contig_490_pilon_pilon-processed-gene-1.63-mRNA-1	XP_012552676.1 rho GTPase-activating protein 26 [Bombyx mori]	XP_012552676.1	77.66	94	19	2	133	224	395	488	4e-37	145
augustus_masked-tulip_contig_490_pilon_pilon-processed-gene-1.64-mRNA-1	XP_012552676.1 rho GTPase-activating protein 26 [Bombyx mori]	XP_012552676.1	80.61	98	18	1	625	722	500	596	4e-38	159
maker-tulip_contig_490_pilon_pilon-augustus-gene-1.22-mRNA-1	OWR51313.1 apoptosis-inducing factor 1 [Danaus plexippus plexippus]	OWR51313.1	53.3	666	217	14	5	632	3	612	0	603
maker-tulip_contig_490_pilon_pilon-augustus-gene-1.24-mRNA-1	XP_026726678.1 uncharacterized protein LOC113493071 [Trichoplusia ni]	XP_026726678.1	82.03	306	54	1	1	305	1	306	2e-167	492
maker-tulip_contig_490_pilon_pilon-augustus-gene-1.25-mRNA-1	XP_022830936.1 uncharacterized protein LOC111359581 [Spodoptera litura]	XP_022830936.1	97.7	261	6	0	3	263	249	509	0	530
maker-tulip_contig_490_pilon_pilon-augustus-gene-1.26-mRNA-1	XP_021185600.1 uncharacterized protein LOC110372907 [Helicoverpa armigera]	XP_021185600.1	77.78	189	33	1	1	189	1	180	5e-100	311
maker-tulip_contig_490_pilon_pilon-augustus-gene-1.27-mRNA-1	XP_022826436.1 uncharacterized protein LOC111356369 [Spodoptera litura]	XP_022826436.1	41.39	807	404	16	1	778	1	767	0	584
maker-tulip_contig_490_pilon_pilon-augustus-gene-1.29-mRNA-1	KPJ11080.1 2-oxoglutarate and iron-dependent oxygenase domain-containing protein 1 [Papilio machaon]	KPJ11080.1	55.84	231	80	4	1	226	334	547	2e-58	209
maker-tulip_contig_490_pilon_pilon-augustus-gene-1.30-mRNA-1	XP_026736755.1 prolyl 3-hydroxylase sudestada1 [Trichoplusia ni]	XP_026736755.1	81.67	300	52	1	1	300	1	297	5e-149	444
maker-tulip_contig_490_pilon_pilon-augustus-gene-1.37-mRNA-1	XP_022823883.1 ADP-ribosylation factor GTPase-activating protein 2 [Spodoptera litura]	XP_022823883.1	87.05	193	12	4	3	190	343	527	7e-95	295
maker-tulip_contig_490_pilon_pilon-augustus-gene-1.38-mRNA-1	XP_022823883.1 ADP-ribosylation factor GTPase-activating protein 2 [Spodoptera litura]	XP_022823883.1	66.22	373	38	9	1	352	1	306	4e-148	439
maker-tulip_contig_490_pilon_pilon-augustus-gene-1.43-mRNA-1	XP_022823887.1 replication factor C subunit 2 [Spodoptera litura]	XP_022823887.1	94	350	12	2	1	348	1	343	0	674
augustus_masked-tulip_contig_490_pilon_pilon-processed-gene-1.76-mRNA-1	XP_022823898.1 lysoplasmalogenase-like [Spodoptera litura]	XP_022823898.1	79.33	150	12	1	26	175	71	201	3e-47	162
maker-tulip_contig_490_pilon_pilon-augustus-gene-1.45-mRNA-1	PZC85021.1 hypothetical protein B5X24_HaOG203342 [Helicoverpa armigera]	PZC85021.1	62.83	538	159	7	21	520	20	554	0	612
maker-tulip_contig_490_pilon_pilon-augustus-gene-1.47-mRNA-1	PCG75884.1 hypothetical protein B5V51_10786, partial [Heliothis virescens]	PCG75884.1	67.08	571	184	2	3	572	32	599	0	827
augustus_masked-tulip_contig_490_pilon_pilon-processed-gene-2.72-mRNA-1	XP_022830807.1 glucose dehydrogenase [FAD, quinone]-like [Spodoptera litura]	XP_022830807.1	88.02	601	72	0	10	610	13	613	0	1108
maker-tulip_contig_490_pilon_pilon-augustus-gene-2.1-mRNA-1	XP_022830814.1 glucose dehydrogenase [FAD, quinone]-like [Spodoptera litura]	XP_022830814.1	89.58	614	64	0	1	614	1	614	0	1169
maker-tulip_contig_490_pilon_pilon-augustus-gene-2.2-mRNA-1	XP_022830925.1 glucose dehydrogenase [FAD, quinone]-like [Spodoptera litura]	XP_022830925.1	86.12	569	79	0	37	605	46	614	0	1056
maker-tulip_contig_490_pilon_pilon-augustus-gene-2.3-mRNA-1	XP_022831029.1 uncharacterized protein LOC111359662 [Spodoptera litura]	XP_022831029.1	86.3	613	84	0	1	613	1	613	0	1136
maker-tulip_contig_490_pilon_pilon-augustus-gene-2.4-mRNA-1	XP_022830994.1 uncharacterized protein LOC111359632 [Spodoptera litura]	XP_022830994.1	83.77	616	71	2	1	587	1	616	0	1078
augustus_masked-tulip_contig_490_pilon_pilon-processed-gene-2.77-mRNA-1	PCG69514.1 hypothetical protein B5V51_4014 [Heliothis virescens]	PCG69514.1	49.3	286	142	3	1	284	1	285	5e-83	265
maker-tulip_contig_490_pilon_pilon-augustus-gene-2.30-mRNA-1	XP_022830969.1 globin-2 A chain-like [Spodoptera litura]	XP_022830969.1	96.49	171	6	0	1	171	1	171	6e-120	346
maker-tulip_contig_490_pilon_pilon-augustus-gene-2.32-mRNA-1	XP_022830872.1 cytoglobin-1 isoform X1 [Spodoptera litura]	XP_022830872.1	92.59	108	8	0	1	108	97	204	1e-68	214
maker-tulip_contig_490_pilon_pilon-augustus-gene-2.34-mRNA-1	XP_026745588.1 uncharacterized protein LOC113506943 [Trichoplusia ni]	XP_026745588.1	49.74	191	88	2	2	188	48	234	6e-51	179
maker-tulip_contig_490_pilon_pilon-augustus-gene-2.35-mRNA-1	XP_022830839.1 transmembrane protein 104 homolog [Spodoptera litura]	XP_022830839.1	100	86	0	0	27	112	98	183	4e-55	187
maker-tulip_contig_490_pilon_pilon-augustus-gene-2.36-mRNA-1	XP_022830839.1 transmembrane protein 104 homolog [Spodoptera litura]	XP_022830839.1	96.85	254	8	0	1	254	254	507	2e-174	501
augustus_masked-tulip_contig_490_pilon_pilon-processed-gene-2.82-mRNA-1	XP_022830795.1 TBC1 domain family member 16 isoform X3 [Spodoptera litura]	XP_022830795.1	98.98	293	3	0	1	293	1	293	0	595
maker-tulip_contig_490_pilon_pilon-augustus-gene-2.39-mRNA-1	XP_022830796.1 TBC1 domain family member 16 isoform X4 [Spodoptera litura]	XP_022830796.1	99.77	441	1	0	5	445	294	734	0	936
augustus_masked-tulip_contig_490_pilon_pilon-processed-gene-2.84-mRNA-1	XP_021192953.1 uncharacterized protein LOC110378139 [Helicoverpa armigera]	XP_021192953.1	80.76	343	66	0	1	343	24	366	0	602
augustus_masked-tulip_contig_490_pilon_pilon-processed-gene-2.85-mRNA-1	XP_022830867.1 uncharacterized protein LOC111359520 [Spodoptera litura]	XP_022830867.1	91.55	343	29	0	1	343	1	343	0	657
maker-tulip_contig_490_pilon_pilon-augustus-gene-2.43-mRNA-1	XP_022830690.1 uncharacterized protein LOC111359393 isoform X2 [Spodoptera litura]	XP_022830690.1	100	136	0	0	5	140	121	256	1e-94	285
augustus_masked-tulip_contig_490_pilon_pilon-processed-gene-2.87-mRNA-1	XP_026490827.1 uncharacterized protein LOC113396950 isoform X2 [Vanessa tameamea]	XP_026490827.1	100	75	0	0	1	75	216	290	2e-46	158
augustus_masked-tulip_contig_490_pilon_pilon-processed-gene-2.88-mRNA-1	PZC86284.1 hypothetical protein B5X24_HaOG211445 [Helicoverpa armigera]	PZC86284.1	88.67	203	22	1	1	203	1	202	1e-104	310
augustus_masked-tulip_contig_490_pilon_pilon-processed-gene-2.89-mRNA-1	XP_022818660.1 uncharacterized protein LOC111351123 [Spodoptera litura]	XP_022818660.1	45.51	156	83	1	4	157	337	492	4e-39	147
augustus_masked-tulip_contig_490_pilon_pilon-processed-gene-2.90-mRNA-1	PCG75292.1 hypothetical protein B5V51_11950 [Heliothis virescens]	PCG75292.1	48.61	288	142	5	91	377	325	607	1e-73	257
augustus_masked-tulip_contig_490_pilon_pilon-processed-gene-2.91-mRNA-1	PCG71129.1 hypothetical protein B5V51_2208, partial [Heliothis virescens]	PCG71129.1	76.5	234	52	1	2	232	79	312	2e-104	316
augustus_masked-tulip_contig_490_pilon_pilon-processed-gene-2.92-mRNA-1	XP_022830910.1 17-beta-hydroxysteroid dehydrogenase 14-like [Spodoptera litura]	XP_022830910.1	91.57	249	21	0	1	249	1	249	7e-164	464
maker-tulip_contig_490_pilon_pilon-augustus-gene-2.45-mRNA-1	XP_022830968.1 deoxyhypusine hydroxylase [Spodoptera litura]	XP_022830968.1	89.8	304	8	1	1	281	1	304	0	555
maker-tulip_contig_490_pilon_pilon-augustus-gene-2.49-mRNA-1	XP_022830800.1 protein Gawky isoform X1 [Spodoptera litura]	XP_022830800.1	99.54	1307	6	0	1	1307	1	1307	0	2647
augustus_masked-tulip_contig_490_pilon_pilon-processed-gene-2.95-mRNA-1	XP_022830591.1 LOW QUALITY PROTEIN: (E3-independent) E2 ubiquitin-conjugating enzyme [Spodoptera litura]	XP_022830591.1	79.47	862	60	12	1	790	537	1353	0	1301
maker-tulip_contig_490_pilon_pilon-augustus-gene-2.64-mRNA-1	XP_022830749.1 nudC domain-containing protein 3 [Spodoptera litura]	XP_022830749.1	85.65	216	28	1	1	213	1	216	1e-116	347
maker-tulip_contig_490_pilon_pilon-augustus-gene-2.68-mRNA-1	XP_013142989.1 PREDICTED: Usher syndrome type-1G protein homolog [Papilio polytes]	XP_013142989.1	64.65	314	69	5	8	290	57	359	1e-126	375
maker-tulip_contig_490_pilon_pilon-augustus-gene-2.70-mRNA-1	XP_022831215.1 uncharacterized protein LOC111359796 [Spodoptera litura]	XP_022831215.1	56.21	169	57	4	1	162	1	159	2e-56	184
maker-tulip_contig_425_pilon_pilon-augustus-gene-0.0-mRNA-1	XP_013191301.1 PREDICTED: integrator complex subunit 6 [Amyelois transitella]	XP_013191301.1	74.92	981	120	10	1	865	1	971	0	1366
maker-tulip_contig_425_pilon_pilon-augustus-gene-0.5-mRNA-1	XP_022822222.1 snurportin-1 [Spodoptera litura]	XP_022822222.1	91.51	212	17	1	1	212	1	211	5e-142	411
augustus_masked-tulip_contig_425_pilon_pilon-processed-gene-0.11-mRNA-1	PCG79215.1 hypothetical protein B5V51_1539 [Heliothis virescens]	PCG79215.1	85.44	206	22	1	1	198	201	406	2e-116	347
augustus_masked-tulip_contig_425_pilon_pilon-processed-gene-0.12-mRNA-1	XP_022822452.1 lachesin-like [Spodoptera litura]	XP_022822452.1	80.92	131	24	1	6	136	22	151	6e-66	215
maker-tulip_contig_146_pilon_pilon-augustus-gene-0.0-mRNA-1	XP_022823678.1 LOW QUALITY PROTEIN: RIB43A-like with coiled-coils protein 2 [Spodoptera litura]	XP_022823678.1	87.07	147	10	1	51	188	42	188	8e-76	242
maker-tulip_contig_146_pilon_pilon-augustus-gene-0.1-mRNA-1	XP_021198662.1 uncharacterized protein LOC110382384 [Helicoverpa armigera]	XP_021198662.1	90.56	392	36	1	1	391	1	392	0	741
maker-tulip_contig_146_pilon_pilon-augustus-gene-0.2-mRNA-1	XP_021198662.1 uncharacterized protein LOC110382384 [Helicoverpa armigera]	XP_021198662.1	49.42	431	91	12	1	304	478	908	1e-104	347
maker-tulip_contig_146_pilon_pilon-augustus-gene-0.9-mRNA-1	XP_022823675.1 rho-associated protein kinase 2-like isoform X1 [Spodoptera litura]	XP_022823675.1	67.78	509	23	4	1	368	1	509	0	619
maker-tulip_contig_146_pilon_pilon-augustus-gene-0.13-mRNA-1	XP_022823781.1 uncharacterized protein LOC111354516 isoform X1 [Spodoptera litura]	XP_022823781.1	77.83	681	127	9	95	763	322	990	0	1041
augustus_masked-tulip_contig_146_pilon_pilon-processed-gene-0.32-mRNA-1	XP_022823784.1 uncharacterized protein LOC111354516 isoform X4 [Spodoptera litura]	XP_022823784.1	70.97	217	56	2	1	210	982	1198	2e-82	274
augustus_masked-tulip_contig_146_pilon_pilon-processed-gene-0.33-mRNA-1	XP_021201089.1 uncharacterized protein LOC110384221 [Helicoverpa armigera]	XP_021201089.1	46.84	301	135	7	1	297	1	280	3e-77	251
augustus_masked-tulip_contig_146_pilon_pilon-processed-gene-0.34-mRNA-1	XP_022823461.1 adiponectin receptor protein [Spodoptera litura]	XP_022823461.1	100	386	0	0	1	386	1	386	0	792
maker-tulip_contig_146_pilon_pilon-augustus-gene-0.16-mRNA-1	XP_022823462.1 malignant T-cell-amplified sequence 1 homolog [Spodoptera litura]	XP_022823462.1	97.8	182	4	0	6	187	1	182	7e-131	375
maker-tulip_contig_146_pilon_pilon-augustus-gene-0.18-mRNA-1	PCG76823.1 hypothetical protein B5V51_8636 [Heliothis virescens]	PCG76823.1	94.08	287	17	0	1	287	1	287	0	536
maker-tulip_contig_146_pilon_pilon-augustus-gene-0.20-mRNA-1	XP_022823677.1 histone deacetylase 11 [Spodoptera litura]	XP_022823677.1	84.3	223	13	1	1	201	104	326	3e-131	382
maker-tulip_contig_146_pilon_pilon-augustus-gene-0.22-mRNA-1	XP_022823562.1 vacuolar-sorting protein SNF8 [Spodoptera litura]	XP_022823562.1	98.8	249	3	0	1	249	1	249	0	508
maker-tulip_contig_146_pilon_pilon-augustus-gene-0.25-mRNA-1	XP_022823467.1 ankyrin repeat and LEM domain-containing protein 2 [Spodoptera litura]	XP_022823467.1	84.8	1013	49	7	1	912	1	1009	0	1713
augustus_masked-tulip_contig_146_pilon_pilon-processed-gene-0.39-mRNA-1	XP_022823793.1 WD repeat-containing protein 18 [Spodoptera litura]	XP_022823793.1	94.92	433	22	0	1	433	1	433	0	862
maker-tulip_contig_638_pilon_pilon-augustus-gene-0.0-mRNA-1	XP_022827264.1 cytochrome P450 4V2-like [Spodoptera litura]	XP_022827264.1	93.09	376	26	0	50	425	117	492	0	726
maker-tulip_contig_638_pilon_pilon-augustus-gene-0.2-mRNA-1	XP_022827225.1 cytochrome P450 4C1-like [Spodoptera litura]	XP_022827225.1	70.33	91	27	0	13	103	239	329	8e-33	126
augustus_masked-tulip_contig_638_pilon_pilon-processed-gene-0.34-mRNA-1	ASO98033.1 cytochrome p450 CYP340AB1 [Spodoptera exigua]	ASO98033.1	76.51	430	95	2	33	457	65	493	0	695
maker-tulip_contig_638_pilon_pilon-augustus-gene-0.4-mRNA-1	XP_022827531.1 cytochrome P450 4C1-like isoform X2 [Spodoptera litura]	XP_022827531.1	53.62	138	62	1	5	140	1	138	6e-46	164
augustus_masked-tulip_contig_638_pilon_pilon-processed-gene-0.35-mRNA-1	XP_022827693.1 facilitated trehalose transporter Tret1-like [Spodoptera litura]	XP_022827693.1	84.01	544	26	4	6	492	1	540	0	900
augustus_masked-tulip_contig_638_pilon_pilon-processed-gene-0.36-mRNA-1	ASO98032.1 cytochrome p450 CYP340AA1 [Spodoptera exigua]	ASO98032.1	99.39	164	1	0	1	164	1	164	2e-115	351
augustus_masked-tulip_contig_638_pilon_pilon-processed-gene-0.37-mRNA-1	XP_022827267.1 cytochrome P450 4V2-like [Spodoptera litura]	XP_022827267.1	57.82	441	135	4	16	405	1	441	1e-179	518
maker-tulip_contig_638_pilon_pilon-augustus-gene-0.22-mRNA-1	ASO98033.1 cytochrome p450 CYP340AB1 [Spodoptera exigua]	ASO98033.1	81.08	444	26	4	30	415	64	507	0	717
augustus_masked-tulip_contig_194_pilon_pilon-processed-gene-0.29-mRNA-1	XP_022168600.1 uncharacterized protein LOC111032530 [Myzus persicae]	XP_022168600.1	82.11	190	34	0	1	190	1	190	3e-111	328
augustus_masked-tulip_contig_194_pilon_pilon-processed-gene-0.31-mRNA-1	XP_022817729.1 uncharacterized protein LOC111350390 isoform X2 [Spodoptera litura]	XP_022817729.1	58.87	124	50	1	1	123	1	124	2e-31	125
maker-tulip_contig_194_pilon_pilon-augustus-gene-0.0-mRNA-1	XP_022819770.1 uncharacterized protein LOC111351834 isoform X1 [Spodoptera litura]	XP_022819770.1	46.88	497	194	11	162	632	338	790	6e-126	413
maker-tulip_contig_194_pilon_pilon-augustus-gene-0.1-mRNA-1	PCG77091.1 hypothetical protein B5V51_8102, partial [Heliothis virescens]	PCG77091.1	81.9	210	38	0	1	210	157	366	1e-120	380
augustus_masked-tulip_contig_194_pilon_pilon-processed-gene-0.35-mRNA-1	PZC74948.1 hypothetical protein B5X24_HaOG206881 [Helicoverpa armigera]	PZC74948.1	72.58	485	100	3	1	455	4167	4648	0	723
augustus_masked-tulip_contig_194_pilon_pilon-processed-gene-0.36-mRNA-1	XP_026331489.1 ATP-dependent DNA helicase PIF1-like [Hyposmocoma kahamanoa]	XP_026331489.1	88.61	79	9	0	1	79	203	281	3e-42	148
maker-tulip_contig_194_pilon_pilon-augustus-gene-0.3-mRNA-1	XP_021186534.1 uncharacterized protein LOC110373556 [Helicoverpa armigera]	XP_021186534.1	73.12	186	36	2	1	185	1	173	1e-89	273
augustus_masked-tulip_contig_194_pilon_pilon-processed-gene-0.40-mRNA-1	XP_026732686.1 uncharacterized protein LOC113497355 [Trichoplusia ni]	XP_026732686.1	100	71	0	0	1	71	93	163	2e-44	152
augustus_masked-tulip_contig_194_pilon_pilon-processed-gene-0.42-mRNA-1	XP_013189374.1 PREDICTED: piggyBac transposable element-derived protein 4-like [Amyelois transitella]	XP_013189374.1	46.37	537	278	8	45	574	107	640	4e-159	479
augustus_masked-tulip_contig_194_pilon_pilon-processed-gene-0.43-mRNA-1	RVE41092.1 hypothetical protein evm_014257 [Chilo suppressalis]	RVE41092.1	76.62	77	18	0	78	154	178	254	2e-31	129
augustus_masked-tulip_contig_194_pilon_pilon-processed-gene-0.44-mRNA-1	RVE41092.1 hypothetical protein evm_014257 [Chilo suppressalis]	RVE41092.1	79.78	89	18	0	1	89	391	479	1e-40	151
maker-tulip_contig_194_pilon_pilon-augustus-gene-0.5-mRNA-1	PCG79034.1 hypothetical protein B5V51_2213 [Heliothis virescens]	PCG79034.1	38.19	199	67	4	1	143	1	199	3e-33	128
maker-tulip_contig_194_pilon_pilon-augustus-gene-0.7-mRNA-1	RVE41390.1 hypothetical protein evm_013959 [Chilo suppressalis]	RVE41390.1	43.48	184	87	5	292	473	159	327	4e-32	135
augustus_masked-tulip_contig_194_pilon_pilon-processed-gene-0.50-mRNA-1	XP_026724798.1 uncharacterized protein LOC113491826 [Trichoplusia ni]	XP_026724798.1	52.8	214	95	3	1	210	126	337	8e-66	216
augustus_masked-tulip_contig_194_pilon_pilon-processed-gene-0.51-mRNA-1	XP_022825647.1 zinc finger BED domain-containing protein 4-like [Spodoptera litura]	XP_022825647.1	50	62	30	1	1	62	192	252	6e-11	67
augustus_masked-tulip_contig_194_pilon_pilon-processed-gene-0.52-mRNA-1	XP_022816214.1 uncharacterized protein LOC111349348 [Spodoptera litura]	XP_022816214.1	84.42	77	12	0	50	126	148	224	1e-36	138
augustus_masked-tulip_contig_194_pilon_pilon-processed-gene-0.53-mRNA-1	XP_026731637.1 uncharacterized protein LOC113496572 [Trichoplusia ni]	XP_026731637.1	62.24	98	37	0	1	98	1	98	1e-32	130
augustus_masked-tulip_contig_194_pilon_pilon-processed-gene-0.54-mRNA-1	XP_026731637.1 uncharacterized protein LOC113496572 [Trichoplusia ni]	XP_026731637.1	61.15	260	97	3	1	257	322	580	2e-88	303
augustus_masked-tulip_contig_194_pilon_pilon-processed-gene-0.55-mRNA-1	XP_026726917.1 uncharacterized protein LOC113493243 [Trichoplusia ni]	XP_026726917.1	51.28	234	107	3	6	235	6	236	3e-65	216
augustus_masked-tulip_contig_194_pilon_pilon-processed-gene-0.57-mRNA-1	XP_022908606.1 uncharacterized protein LOC111419952 [Onthophagus taurus]	XP_022908606.1	86.11	72	10	0	3	74	27	98	2e-37	139
augustus_masked-tulip_contig_194_pilon_pilon-processed-gene-0.58-mRNA-1	XP_022820981.1 uncharacterized protein LOC111352623 [Spodoptera litura]	XP_022820981.1	60.95	105	37	2	1	101	121	225	2e-25	103
augustus_masked-tulip_contig_194_pilon_pilon-processed-gene-0.60-mRNA-1	XP_021186669.1 uncharacterized protein LOC110373661 [Helicoverpa armigera]	XP_021186669.1	56.73	245	104	1	1	243	215	459	2e-98	305
augustus_masked-tulip_contig_194_pilon_pilon-processed-gene-0.61-mRNA-1	XP_026318671.1 uncharacterized protein LOC113229329 [Hyposmocoma kahamanoa]	XP_026318671.1	59.65	228	88	1	53	280	1	224	3e-96	295
augustus_masked-tulip_contig_194_pilon_pilon-processed-gene-0.62-mRNA-1	RVE42487.1 hypothetical protein evm_012859 [Chilo suppressalis]	RVE42487.1	48.65	74	26	2	1	69	243	309	4e-10	63.9
maker-tulip_contig_194_pilon_pilon-augustus-gene-0.9-mRNA-1	XP_026319427.1 uncharacterized protein LOC113229949 [Hyposmocoma kahamanoa]	XP_026319427.1	42.57	350	140	6	80	371	17	363	8e-79	263
augustus_masked-tulip_contig_194_pilon_pilon-processed-gene-0.65-mRNA-1	XP_026319427.1 uncharacterized protein LOC113229949 [Hyposmocoma kahamanoa]	XP_026319427.1	57.58	231	94	1	1	231	370	596	7e-86	276
augustus_masked-tulip_contig_194_pilon_pilon-processed-gene-0.66-mRNA-1	RVE40549.1 hypothetical protein evm_014800 [Chilo suppressalis]	RVE40549.1	48	75	39	0	1	75	659	733	2e-17	84.3
maker-tulip_contig_194_pilon_pilon-augustus-gene-0.10-mRNA-1	XP_026743188.1 uncharacterized protein LOC113504887 [Trichoplusia ni]	XP_026743188.1	40.69	145	60	6	13	152	27	150	3e-12	72.4
maker-tulip_contig_194_pilon_pilon-augustus-gene-0.12-mRNA-1	RVE39951.1 hypothetical protein evm_015399 [Chilo suppressalis]	RVE39951.1	40.09	454	216	7	145	548	115	562	2e-103	340
maker-tulip_contig_194_pilon_pilon-augustus-gene-0.13-mRNA-1	XP_022827197.1 actin cytoskeleton-regulatory complex protein pan1 [Spodoptera litura]	XP_022827197.1	82.55	470	26	3	13	463	151	583	0	724
augustus_masked-tulip_contig_194_pilon_pilon-processed-gene-0.70-mRNA-1	XP_021198642.1 protein ANTAGONIST OF LIKE HETEROCHROMATIN PROTEIN 1-like [Helicoverpa armigera]	XP_021198642.1	88.55	166	18	1	2	167	76	240	3e-99	305
augustus_masked-tulip_contig_194_pilon_pilon-processed-gene-0.72-mRNA-1	XP_013199594.1 PREDICTED: uncharacterized protein LOC106142391 [Amyelois transitella]	XP_013199594.1	64.98	277	93	2	1	273	119	395	2e-131	389
maker-tulip_contig_194_pilon_pilon-augustus-gene-0.17-mRNA-1	XP_021186480.1 uncharacterized protein LOC110373511 [Helicoverpa armigera]	XP_021186480.1	74.3	179	46	0	1	179	52	230	3e-93	288
augustus_masked-tulip_contig_194_pilon_pilon-processed-gene-0.75-mRNA-1	PCG62646.1 hypothetical protein B5V51_13987, partial [Heliothis virescens]	PCG62646.1	55.95	84	37	0	135	218	373	456	1e-22	105
maker-tulip_contig_194_pilon_pilon-augustus-gene-0.19-mRNA-1	RVE47487.1 hypothetical protein evm_007898 [Chilo suppressalis]	RVE47487.1	44.3	158	80	3	9	158	246	403	1e-35	136
augustus_masked-tulip_contig_194_pilon_pilon-processed-gene-0.77-mRNA-1	PCG71372.1 hypothetical protein B5V51_1922, partial [Heliothis virescens]	PCG71372.1	78.33	60	13	0	17	76	95	154	1e-21	92
augustus_masked-tulip_contig_194_pilon_pilon-processed-gene-0.78-mRNA-1	XP_026329041.1 protein ALP1-like [Hyposmocoma kahamanoa]	XP_026329041.1	79.49	156	32	0	1	156	90	245	5e-86	266
maker-tulip_contig_194_pilon_pilon-augustus-gene-0.20-mRNA-1	XP_022827407.1 aminopeptidase N-like [Spodoptera litura]	XP_022827407.1	91.3	69	6	0	1	69	864	932	9e-34	130
maker-tulip_contig_194_pilon_pilon-augustus-gene-0.21-mRNA-1	XP_022827407.1 aminopeptidase N-like [Spodoptera litura]	XP_022827407.1	57.23	339	71	7	20	285	147	484	2e-100	327
augustus_masked-tulip_contig_194_pilon_pilon-processed-gene-0.82-mRNA-1	PZC71657.1 hypothetical protein B5X24_HaOG212766 [Helicoverpa armigera]	PZC71657.1	54.75	179	75	3	50	226	10	184	2e-47	167
maker-tulip_contig_194_pilon_pilon-augustus-gene-0.4-mRNA-1	XP_022823361.1 piggyBac transposable element-derived protein 3-like [Spodoptera litura]	XP_022823361.1	96.29	458	15	1	1	456	1	458	0	910
maker-tulip_contig_194_pilon_pilon-augustus-gene-1.0-mRNA-1	XP_022827326.1 nucleolar protein 12 [Spodoptera litura]	XP_022827326.1	82.59	781	105	9	1	758	1	773	0	1069
maker-tulip_contig_194_pilon_pilon-augustus-gene-1.2-mRNA-1	XP_022827329.1 28S ribosomal protein S18c, mitochondrial isoform X2 [Spodoptera litura]	XP_022827329.1	91.11	135	12	0	1	135	1	135	9e-86	256
augustus_masked-tulip_contig_194_pilon_pilon-processed-gene-1.30-mRNA-1	XP_022827507.1 succinate dehydrogenase [ubiquinone] iron-sulfur subunit, mitochondrial-like [Spodoptera litura]	XP_022827507.1	98.58	282	4	0	1	282	1	282	0	582
maker-tulip_contig_194_pilon_pilon-augustus-gene-1.4-mRNA-1	XP_022827523.1 glutamyl-tRNA(Gln) amidotransferase subunit A, mitochondrial [Spodoptera litura]	XP_022827523.1	94.32	475	27	0	29	503	17	491	0	902
maker-tulip_contig_194_pilon_pilon-augustus-gene-1.5-mRNA-1	XP_022827524.1 uncharacterized protein LOC111357170 [Spodoptera litura]	XP_022827524.1	83.8	216	35	0	14	229	1	216	3e-123	358
maker-tulip_contig_194_pilon_pilon-augustus-gene-1.8-mRNA-1	XP_022827461.1 nucleolar protein 14 homolog [Spodoptera litura]	XP_022827461.1	85.61	966	77	6	1	906	1	964	0	1520
maker-tulip_contig_194_pilon_pilon-augustus-gene-1.10-mRNA-1	XP_022827466.1 translocator protein-like isoform X2 [Spodoptera litura]	XP_022827466.1	95.03	181	9	0	1	181	6	186	7e-123	354
maker-tulip_contig_194_pilon_pilon-augustus-gene-1.12-mRNA-1	XP_022827275.1 triadin-like isoform X2 [Spodoptera litura]	XP_022827275.1	81.93	509	40	6	1	466	25	524	0	753
maker-tulip_contig_194_pilon_pilon-augustus-gene-1.13-mRNA-1	XP_022827323.1 ABC transporter G family member 20 isoform X3 [Spodoptera litura]	XP_022827323.1	99.8	492	1	0	6	497	290	781	0	1012
augustus_masked-tulip_contig_194_pilon_pilon-processed-gene-1.36-mRNA-1	OWR54659.1 abc transporter [Danaus plexippus plexippus]	OWR54659.1	100	65	0	0	8	72	116	180	1e-38	143
augustus_masked-tulip_contig_194_pilon_pilon-processed-gene-1.37-mRNA-1	XP_022827327.1 MAP kinase phosphatase with leucine-rich repeats protein 1-like [Spodoptera litura]	XP_022827327.1	79.06	487	102	0	1	487	1	487	0	734
maker-tulip_contig_194_pilon_pilon-augustus-gene-1.15-mRNA-1	XP_022827314.1 biorientation of chromosomes in cell division protein 1-like 1 isoform X1 [Spodoptera litura]	XP_022827314.1	87.51	1193	131	10	1	1187	1	1181	0	1786
augustus_masked-tulip_contig_194_pilon_pilon-processed-gene-1.39-mRNA-1	XP_022827525.1 cilia- and flagella-associated protein 206-like [Spodoptera litura]	XP_022827525.1	86.13	649	78	2	1	637	1	649	0	1177
maker-tulip_contig_194_pilon_pilon-augustus-gene-1.20-mRNA-1	XP_022827464.1 upstream activation factor subunit spp27 isoform X2 [Spodoptera litura]	XP_022827464.1	97.59	83	2	0	36	118	141	223	4e-55	180
maker-tulip_contig_194_pilon_pilon-augustus-gene-1.21-mRNA-1	XP_022827463.1 putative DNA helicase INO80 isoform X1 [Spodoptera litura]	XP_022827463.1	80.85	282	50	4	1	280	1	280	2e-132	386
maker-tulip_contig_194_pilon_pilon-augustus-gene-1.24-mRNA-1	XP_022827470.1 translocator protein-like [Spodoptera litura]	XP_022827470.1	91.62	167	14	0	1	167	1	167	4e-109	318
maker-tulip_contig_194_pilon_pilon-augustus-gene-1.25-mRNA-1	XP_022827566.1 outer dynein arm protein 1-like isoform X1 [Spodoptera litura]	XP_022827566.1	56.59	205	38	2	1	154	1	205	3e-51	187
augustus_masked-tulip_contig_194_pilon_pilon-processed-gene-2.0-mRNA-1	XP_026744650.1 uncharacterized protein LOC113505984 [Trichoplusia ni]	XP_026744650.1	43.44	389	190	9	2	377	4	375	1e-91	290
augustus_masked-tulip_contig_194_pilon_pilon-processed-gene-2.1-mRNA-1	XP_022827480.1 alpha-2Db adrenergic receptor isoform X1 [Spodoptera litura]	XP_022827480.1	90.61	213	20	0	1	213	1	213	2e-130	390
augustus_masked-tulip_contig_194_pilon_pilon-processed-gene-2.3-mRNA-1	XP_022836994.1 uncharacterized protein LOC111364379 [Spodoptera litura]	XP_022836994.1	68.68	348	60	2	1	314	1	333	3e-163	470
maker-tulip_contig_194_pilon_pilon-augustus-gene-2.17-mRNA-1	XP_026746068.1 zinc finger BED domain-containing protein 6-like [Trichoplusia ni]	XP_026746068.1	46.51	86	44	1	17	102	10	93	2e-21	91.7
maker-tulip_contig_194_pilon_pilon-augustus-gene-2.18-mRNA-1	KMQ87740.1 hypothetical protein RF55_12896 [Lasius niger]	KMQ87740.1	45.02	311	170	1	155	465	83	392	5e-93	309
maker-tulip_contig_194_pilon_pilon-augustus-gene-2.20-mRNA-1	PZC73218.1 hypothetical protein B5X24_HaOG209898 [Helicoverpa armigera]	PZC73218.1	69.47	95	28	1	53	146	87	181	5e-33	130
augustus_masked-tulip_contig_194_pilon_pilon-processed-gene-2.8-mRNA-1	XP_021196578.1 piggyBac transposable element-derived protein 4-like [Helicoverpa armigera]	XP_021196578.1	87.67	146	18	0	1	146	276	421	2e-87	277
augustus_masked-tulip_contig_194_pilon_pilon-processed-gene-2.9-mRNA-1	JAT83242.1 hypothetical protein g.8357 [Pectinophora gossypiella]	JAT83242.1	61.87	257	98	0	114	370	1	257	3e-114	347
augustus_masked-tulip_contig_194_pilon_pilon-processed-gene-2.10-mRNA-1	PZC75021.1 hypothetical protein B5X24_HaOG206846 [Helicoverpa armigera]	PZC75021.1	48.66	261	130	2	9	267	137	395	2e-72	260
maker-tulip_contig_194_pilon_pilon-augustus-gene-2.22-mRNA-1	XP_023944881.1 uncharacterized protein LOC112050769 [Bicyclus anynana]	XP_023944881.1	48.68	189	78	4	2	187	3	175	1e-50	174
augustus_masked-tulip_contig_194_pilon_pilon-processed-gene-2.14-mRNA-1	XP_013187794.1 PREDICTED: putative nuclease HARBI1 [Amyelois transitella]	XP_013187794.1	64.44	419	147	2	5	421	29	447	0	563
augustus_masked-tulip_contig_752_pilon_pilon-processed-gene-0.1-mRNA-1	XP_017466088.1 PREDICTED: uncharacterized protein LOC108358992 isoform X9 [Rhagoletis zephyria]	XP_017466088.1	61.8	89	25	1	1	80	608	696	8e-26	107
maker-tulip_contig_752_pilon_pilon-augustus-gene-0.0-mRNA-1	XP_021203680.1 uncharacterized protein LOC101735321 [Bombyx mori]	XP_021203680.1	67.17	332	107	2	1	330	1	332	6e-154	461
augustus_masked-tulip_contig_15_pilon_pilon-processed-gene-0.11-mRNA-1	XP_022822543.1 uncharacterized protein LOC111353678 [Spodoptera litura]	XP_022822543.1	59.79	189	76	0	1	189	94	282	3e-72	234
augustus_masked-tulip_contig_15_pilon_pilon-processed-gene-0.12-mRNA-1	XP_022816402.1 uncharacterized protein LOC111349505 isoform X2 [Spodoptera litura]	XP_022816402.1	99.73	751	2	0	38	788	671	1421	0	1538
augustus_masked-tulip_contig_15_pilon_pilon-processed-gene-0.13-mRNA-1	PCG75186.1 hypothetical protein B5V51_12086 [Heliothis virescens]	PCG75186.1	89.03	811	47	2	1	770	1	810	0	1430
augustus_masked-tulip_contig_15_pilon_pilon-processed-gene-0.14-mRNA-1	XP_026744705.1 uncharacterized protein LOC113506043 [Trichoplusia ni]	XP_026744705.1	68.95	277	84	1	1	275	1	277	3e-140	407
augustus_masked-tulip_contig_15_pilon_pilon-processed-gene-0.15-mRNA-1	PCG77324.1 hypothetical protein B5V51_7552 [Heliothis virescens]	PCG77324.1	95.55	1347	30	2	28	1347	30	1373	0	2545
augustus_masked-tulip_contig_15_pilon_pilon-processed-gene-0.16-mRNA-1	RVE48490.1 hypothetical protein evm_006801 [Chilo suppressalis]	RVE48490.1	48.98	245	120	2	3	247	5	244	9e-68	229
maker-tulip_contig_15_pilon_pilon-augustus-gene-1.0-mRNA-1	XP_013136029.1 PREDICTED: dedicator of cytokinesis protein 3-like [Papilio polytes]	XP_013136029.1	92.26	155	12	0	1	155	1	155	5e-100	294
maker-tulip_contig_15_pilon_pilon-augustus-gene-1.2-mRNA-1	XP_022816275.1 dedicator of cytokinesis protein 3 [Spodoptera litura]	XP_022816275.1	85.03	648	19	6	1	570	156	803	0	1070
maker-tulip_contig_15_pilon_pilon-augustus-gene-1.3-mRNA-1	XP_022816275.1 dedicator of cytokinesis protein 3 [Spodoptera litura]	XP_022816275.1	88.02	718	18	4	33	682	979	1696	0	1266
augustus_masked-tulip_contig_15_pilon_pilon-processed-gene-1.19-mRNA-1	XP_022825679.1 uncharacterized protein LOC111355833 [Spodoptera litura]	XP_022825679.1	71.66	247	61	1	1	238	4	250	1e-128	374
maker-tulip_contig_15_pilon_pilon-augustus-gene-1.4-mRNA-1	XP_022816275.1 dedicator of cytokinesis protein 3 [Spodoptera litura]	XP_022816275.1	97	100	3	0	4	103	1734	1833	5e-60	207
augustus_masked-tulip_contig_15_pilon_pilon-processed-gene-1.21-mRNA-1	XP_022824829.1 uncharacterized protein LOC111355280 [Spodoptera litura]	XP_022824829.1	93.55	310	20	0	17	326	8	317	0	607
augustus_masked-tulip_contig_15_pilon_pilon-processed-gene-1.22-mRNA-1	XP_022816613.1 ubiquitin carboxyl-terminal hydrolase-like [Spodoptera litura]	XP_022816613.1	92.11	228	17	1	1	227	1	228	1e-152	434
maker-tulip_contig_15_pilon_pilon-augustus-gene-1.11-mRNA-1	KPJ01551.1 hypothetical protein RR46_08588 [Papilio xuthus]	KPJ01551.1	52.13	94	33	5	1	89	1	87	2e-16	76.3
maker-tulip_contig_15_pilon_pilon-augustus-gene-1.13-mRNA-1	XP_022816025.1 innexin inx3 [Spodoptera litura]	XP_022816025.1	98.7	386	5	0	1	386	1	386	0	796
augustus_masked-tulip_contig_15_pilon_pilon-processed-gene-1.27-mRNA-1	XP_021188397.1 GATA-binding factor C-like isoform X1 [Helicoverpa armigera]	XP_021188397.1	88.43	216	15	3	12	226	82	288	5e-125	373
maker-tulip_contig_15_pilon_pilon-augustus-gene-2.15-mRNA-1	XP_022816318.1 protein FAM32A [Spodoptera litura]	XP_022816318.1	92.98	114	4	1	1	114	1	110	2e-67	207
maker-tulip_contig_15_pilon_pilon-augustus-gene-2.17-mRNA-1	XP_011560948.1 PREDICTED: transcription elongation factor 1 homolog [Plutella xylostella]	XP_011560948.1	100	82	0	0	1	82	1	82	3e-54	172
maker-tulip_contig_15_pilon_pilon-augustus-gene-2.19-mRNA-1	XP_022816349.1 calcium homeostasis endoplasmic reticulum protein isoform X1 [Spodoptera litura]	XP_022816349.1	95.74	822	12	1	1	799	1	822	0	1628
maker-tulip_contig_15_pilon_pilon-augustus-gene-2.23-mRNA-1	XP_022816317.1 uncharacterized protein LOC111349442 [Spodoptera litura]	XP_022816317.1	91.18	612	19	1	1	577	1	612	0	1160
augustus_masked-tulip_contig_15_pilon_pilon-processed-gene-2.8-mRNA-1	PZC79447.1 hypothetical protein B5X24_HaOG216330 [Helicoverpa armigera]	PZC79447.1	83.61	244	39	1	13	256	1	243	3e-130	379
augustus_masked-tulip_contig_15_pilon_pilon-processed-gene-2.9-mRNA-1	APZ89680.1 N-ethylmaleimide-sensitive factor [Spodoptera frugiperda]	APZ89680.1	92.53	776	8	2	1	756	1	746	0	1447
maker-tulip_contig_15_pilon_pilon-augustus-gene-2.33-mRNA-1	XP_022816627.1 protein misato [Spodoptera litura]	XP_022816627.1	94.84	543	28	0	1	543	1	543	0	1090
maker-tulip_contig_15_pilon_pilon-augustus-gene-2.35-mRNA-1	XP_022816510.1 uncharacterized protein LOC111349585 isoform X1 [Spodoptera litura]	XP_022816510.1	98.81	588	5	2	16	601	21	608	0	1189
maker-tulip_contig_15_pilon_pilon-augustus-gene-2.37-mRNA-1	XP_022816509.1 protein PFC0760c-like [Spodoptera litura]	XP_022816509.1	79.39	1936	319	18	1	1894	1	1898	0	2607
maker-tulip_contig_15_pilon_pilon-augustus-gene-2.40-mRNA-1	XP_022816246.1 bifunctional heparan sulfate N-deacetylase/N-sulfotransferase [Spodoptera litura]	XP_022816246.1	99.78	899	2	0	1	899	1	899	0	1868
augustus_masked-tulip_contig_15_pilon_pilon-processed-gene-2.14-mRNA-1	XP_026726622.1 uncharacterized protein LOC113493040 [Trichoplusia ni]	XP_026726622.1	56.75	252	104	3	1	251	1	248	4e-93	303
augustus_masked-tulip_contig_15_pilon_pilon-processed-gene-3.0-mRNA-1	XP_022816249.1 39S ribosomal protein L47, mitochondrial [Spodoptera litura]	XP_022816249.1	90.27	257	23	1	1	255	2	258	2e-171	483
maker-tulip_contig_15_pilon_pilon-augustus-gene-3.49-mRNA-1	XP_022816522.1 cuticle protein 8-like [Spodoptera litura]	XP_022816522.1	97.56	164	4	0	1	164	1	164	7e-104	305
maker-tulip_contig_15_pilon_pilon-augustus-gene-3.51-mRNA-1	XP_022816681.1 larval cuticle protein 16/17-like [Spodoptera litura]	XP_022816681.1	85.14	148	20	1	18	163	6	153	4e-89	267
maker-tulip_contig_15_pilon_pilon-augustus-gene-3.53-mRNA-1	XP_022816671.1 uncharacterized protein LOC111349698 [Spodoptera litura]	XP_022816671.1	69.12	272	64	4	1	253	1	271	2e-126	370
maker-tulip_contig_15_pilon_pilon-augustus-gene-3.55-mRNA-1	XP_022816441.1 cuticle protein 19-like [Spodoptera litura]	XP_022816441.1	91.94	62	5	0	1	62	1	62	8e-28	105
augustus_masked-tulip_contig_15_pilon_pilon-processed-gene-3.5-mRNA-1	XP_022816468.1 cuticle protein 7-like isoform X1 [Spodoptera litura]	XP_022816468.1	93.14	175	2	1	1	165	1	175	1e-110	322
maker-tulip_contig_15_pilon_pilon-augustus-gene-3.61-mRNA-1	XP_022816150.1 uncharacterized protein LOC111349306 [Spodoptera litura]	XP_022816150.1	85.12	215	32	0	1	215	1	215	1e-120	351
maker-tulip_contig_15_pilon_pilon-augustus-gene-3.63-mRNA-1	XP_022816770.1 cuticle protein 19-like [Spodoptera litura]	XP_022816770.1	97.2	143	4	0	1	143	1	143	1e-95	282
maker-tulip_contig_15_pilon_pilon-augustus-gene-3.65-mRNA-1	XP_022816769.1 uncharacterized protein LOC111349764 [Spodoptera litura]	XP_022816769.1	89.98	409	41	0	1	409	1	409	0	700
augustus_masked-tulip_contig_15_pilon_pilon-processed-gene-3.10-mRNA-1	XP_022815928.1 cuticle protein 19-like [Spodoptera litura]	XP_022815928.1	94.92	236	12	0	99	334	5	240	3e-129	379
augustus_masked-tulip_contig_15_pilon_pilon-processed-gene-3.11-mRNA-1	XP_022815951.1 adult-specific cuticular protein ACP-20-like [Spodoptera litura]	XP_022815951.1	97.24	145	3	1	1	145	1	144	2e-89	266
maker-tulip_contig_15_pilon_pilon-augustus-gene-3.74-mRNA-1	XP_022815929.1 histidine-rich glycoprotein-like [Spodoptera litura]	XP_022815929.1	73.08	234	46	2	1	217	1	234	4e-90	275
maker-tulip_contig_15_pilon_pilon-augustus-gene-3.75-mRNA-1	XP_022815929.1 histidine-rich glycoprotein-like [Spodoptera litura]	XP_022815929.1	72.35	217	43	2	1	200	1	217	7e-80	248
maker-tulip_contig_15_pilon_pilon-augustus-gene-3.76-mRNA-1	XP_022815936.1 histidine-rich glycoprotein-like isoform X2 [Spodoptera litura]	XP_022815936.1	74.87	195	44	1	1	190	1	195	3e-66	212
maker-tulip_contig_15_pilon_pilon-augustus-gene-3.77-mRNA-1	XP_022815934.1 histidine-rich glycoprotein-like isoform X1 [Spodoptera litura]	XP_022815934.1	79.9	209	31	3	1	200	1	207	5e-84	258
augustus_masked-tulip_contig_15_pilon_pilon-processed-gene-3.16-mRNA-1	XP_022815934.1 histidine-rich glycoprotein-like isoform X1 [Spodoptera litura]	XP_022815934.1	84.54	207	22	1	1	197	1	207	5e-88	268
augustus_masked-tulip_contig_15_pilon_pilon-processed-gene-3.17-mRNA-1	XP_022816256.1 cuticle protein 18.6-like [Spodoptera litura]	XP_022816256.1	89.92	119	8	1	1	115	13	131	2e-62	196
maker-tulip_contig_15_pilon_pilon-augustus-gene-3.101-mRNA-1	XP_022816256.1 cuticle protein 18.6-like [Spodoptera litura]	XP_022816256.1	92.5	120	9	0	1	120	12	131	2e-64	201
augustus_masked-tulip_contig_15_pilon_pilon-processed-gene-3.19-mRNA-1	XP_022816259.1 cuticle protein 19-like [Spodoptera litura]	XP_022816259.1	100	99	0	0	25	123	29	127	5e-64	200
maker-tulip_contig_15_pilon_pilon-augustus-gene-3.103-mRNA-1	XP_022816259.1 cuticle protein 19-like [Spodoptera litura]	XP_022816259.1	89.91	109	2	1	27	135	28	127	2e-58	187
augustus_masked-tulip_contig_15_pilon_pilon-processed-gene-3.21-mRNA-1	XP_022815956.1 histidine-rich glycoprotein-like [Spodoptera litura]	XP_022815956.1	97.27	110	3	0	1	110	1	110	6e-67	207
maker-tulip_contig_15_pilon_pilon-augustus-gene-3.105-mRNA-1	XP_021188995.1 histidine-rich glycoprotein-like [Helicoverpa armigera]	XP_021188995.1	46.83	126	14	2	1	78	1	121	9e-22	90.9
maker-tulip_contig_15_pilon_pilon-augustus-gene-3.106-mRNA-1	XP_022815958.1 adult-specific cuticular protein ACP-20-like [Spodoptera litura]	XP_022815958.1	90.4	125	11	1	1	125	2	125	1e-68	212
maker-tulip_contig_15_pilon_pilon-augustus-gene-3.107-mRNA-1	XP_022816263.1 cuticle protein 19-like [Spodoptera litura]	XP_022816263.1	91.67	120	10	0	8	127	22	141	1e-66	208
maker-tulip_contig_15_pilon_pilon-augustus-gene-3.108-mRNA-1	XP_022815959.1 histidine-rich glycoprotein-like [Spodoptera litura]	XP_022815959.1	97.27	110	3	0	2	111	15	124	9e-64	199
maker-tulip_contig_15_pilon_pilon-augustus-gene-3.109-mRNA-1	XP_022816266.1 cuticle protein 7-like [Spodoptera litura]	XP_022816266.1	84.4	109	17	0	51	159	3	111	5e-56	182
maker-tulip_contig_15_pilon_pilon-augustus-gene-3.110-mRNA-1	XP_022815934.1 histidine-rich glycoprotein-like isoform X1 [Spodoptera litura]	XP_022815934.1	73.45	177	23	2	31	183	31	207	2e-72	228
maker-tulip_contig_15_pilon_pilon-augustus-gene-3.111-mRNA-1	XP_022816266.1 cuticle protein 7-like [Spodoptera litura]	XP_022816266.1	90.09	111	11	0	1	111	1	111	6e-62	195
maker-tulip_contig_15_pilon_pilon-augustus-gene-3.112-mRNA-1	XP_022816266.1 cuticle protein 7-like [Spodoptera litura]	XP_022816266.1	90.09	111	11	0	1	111	1	111	3e-61	193
maker-tulip_contig_15_pilon_pilon-augustus-gene-3.113-mRNA-1	XP_022815963.1 histidine-rich glycoprotein-like [Spodoptera litura]	XP_022815963.1	97.06	102	3	0	1	102	1	102	5e-59	190
maker-tulip_contig_15_pilon_pilon-augustus-gene-3.179-mRNA-1	XP_022816248.1 uncharacterized protein LOC111349377 [Spodoptera litura]	XP_022816248.1	69.09	618	131	4	1	558	1	618	0	877
augustus_masked-tulip_contig_15_pilon_pilon-processed-gene-3.32-mRNA-1	XP_022816683.1 erythrocyte band 7 integral membrane protein-like [Spodoptera litura]	XP_022816683.1	95.98	174	7	0	270	443	132	305	5e-113	344
maker-tulip_contig_15_pilon_pilon-augustus-gene-3.185-mRNA-1	XP_022816234.1 band 7 protein AGAP004871-like isoform X2 [Spodoptera litura]	XP_022816234.1	85.82	141	10	1	1	131	1	141	2e-79	246
maker-tulip_contig_15_pilon_pilon-augustus-gene-3.202-mRNA-1	XP_021188392.1 uncharacterized protein LOC110374828 [Helicoverpa armigera]	XP_021188392.1	56.82	403	156	8	20	412	16	410	5e-149	439
augustus_masked-tulip_contig_15_pilon_pilon-processed-gene-3.36-mRNA-1	OWR43207.1 gag protein [Danaus plexippus plexippus]	OWR43207.1	78.91	313	59	4	1	312	14	320	4e-143	427
maker-tulip_contig_15_pilon_pilon-augustus-gene-3.205-mRNA-1	XP_022815920.1 histidine-rich protein PFHRP-II-like [Spodoptera litura]	XP_022815920.1	86.59	358	29	2	1	339	1	358	0	557
maker-tulip_contig_15_pilon_pilon-augustus-gene-3.206-mRNA-1	XP_022815932.1 histidine-rich glycoprotein-like [Spodoptera litura]	XP_022815932.1	86.45	214	24	1	1	209	1	214	1e-104	311
maker-tulip_contig_15_pilon_pilon-augustus-gene-3.213-mRNA-1	XP_022815944.1 uncharacterized protein LOC111349182 [Spodoptera litura]	XP_022815944.1	40.21	189	89	6	1	188	1	166	8e-21	93.2
maker-tulip_contig_15_pilon_pilon-augustus-gene-3.214-mRNA-1	XP_022816256.1 cuticle protein 18.6-like [Spodoptera litura]	XP_022816256.1	92.37	131	10	0	1	131	1	131	1e-73	226
maker-tulip_contig_15_pilon_pilon-augustus-gene-3.217-mRNA-1	XP_022815934.1 histidine-rich glycoprotein-like isoform X1 [Spodoptera litura]	XP_022815934.1	82.61	207	26	1	1	197	1	207	2e-88	268
maker-tulip_contig_15_pilon_pilon-augustus-gene-3.218-mRNA-1	XP_022815934.1 histidine-rich glycoprotein-like isoform X1 [Spodoptera litura]	XP_022815934.1	83.57	207	29	1	1	202	1	207	6e-88	268
maker-tulip_contig_15_pilon_pilon-augustus-gene-3.221-mRNA-1	XP_022816258.1 pupal cuticle protein Edg-84A-like [Spodoptera litura]	XP_022816258.1	71.26	247	29	4	1	207	1	245	1e-93	284
maker-tulip_contig_15_pilon_pilon-augustus-gene-3.222-mRNA-1	XP_022816259.1 cuticle protein 19-like [Spodoptera litura]	XP_022816259.1	100	74	0	0	4	77	54	127	1e-45	151
augustus_masked-tulip_contig_254_pilon_pilon-processed-gene-0.36-mRNA-1	XP_022818868.1 protein hu-li tai shao isoform X4 [Spodoptera litura]	XP_022818868.1	70.98	441	13	4	1	326	1	441	0	583
augustus_masked-tulip_contig_254_pilon_pilon-processed-gene-0.37-mRNA-1	PZC71266.1 hypothetical protein B5X24_HaOG213732 [Helicoverpa armigera]	PZC71266.1	62.44	1347	410	35	62	1336	514	1836	0	1519
augustus_masked-tulip_contig_254_pilon_pilon-processed-gene-0.38-mRNA-1	XP_026318340.1 protein hu-li tai shao-like [Hyposmocoma kahamanoa]	XP_026318340.1	98.48	66	1	0	9	74	275	340	4e-34	127
maker-tulip_contig_254_pilon_pilon-augustus-gene-0.20-mRNA-1	XP_022835290.1 uncharacterized protein LOC111362772 [Spodoptera litura]	XP_022835290.1	85.85	212	19	2	53	253	111	322	5e-121	368
augustus_masked-tulip_contig_254_pilon_pilon-processed-gene-0.40-mRNA-1	XP_022835290.1 uncharacterized protein LOC111362772 [Spodoptera litura]	XP_022835290.1	85.38	130	16	1	1	130	465	591	3e-65	217
maker-tulip_contig_254_pilon_pilon-augustus-gene-0.22-mRNA-1	XP_022835287.1 pancreatic lipase-related protein 2-like isoform X1 [Spodoptera litura]	XP_022835287.1	55.69	246	72	6	4	212	16	261	1e-68	231
augustus_masked-tulip_contig_254_pilon_pilon-processed-gene-0.43-mRNA-1	XP_022818947.1 U4/U6.U5 small nuclear ribonucleoprotein 27 kDa protein [Spodoptera litura]	XP_022818947.1	98.69	153	2	0	1	153	1	153	1e-97	288
maker-tulip_contig_254_pilon_pilon-augustus-gene-0.23-mRNA-1	PCG72271.1 hypothetical protein B5V51_973 [Heliothis virescens]	PCG72271.1	33.04	112	50	2	1	92	1	107	1e-10	62
maker-tulip_contig_254_pilon_pilon-augustus-gene-0.26-mRNA-1	XP_022836756.1 pyroglutamyl-peptidase 1-like [Spodoptera litura]	XP_022836756.1	69.57	69	21	0	1	69	1	69	5e-26	105
augustus_masked-tulip_contig_254_pilon_pilon-processed-gene-0.45-mRNA-1	XP_022835516.1 zinc finger protein 558-like [Spodoptera litura]	XP_022835516.1	92.12	203	16	0	1	203	110	312	8e-137	396
maker-tulip_contig_254_pilon_pilon-augustus-gene-0.27-mRNA-1	XP_022835514.1 zinc finger protein 43-like [Spodoptera litura]	XP_022835514.1	77.9	371	56	9	1	354	1	362	2e-156	458
maker-tulip_contig_254_pilon_pilon-augustus-gene-0.31-mRNA-1	XP_022835289.1 double-stranded RNA-specific editase Adar [Spodoptera litura]	XP_022835289.1	82.35	51	8	1	78	127	634	684	6e-17	87.8
maker-tulip_contig_254_pilon_pilon-augustus-gene-0.32-mRNA-1	XP_022835289.1 double-stranded RNA-specific editase Adar [Spodoptera litura]	XP_022835289.1	87.05	278	34	2	46	322	307	583	3e-156	466
augustus_masked-tulip_contig_33_pilon_pilon-processed-gene-0.0-mRNA-1	XP_022826363.1 uncharacterized protein LOC111356291 [Spodoptera litura]	XP_022826363.1	85.16	674	21	2	1	595	221	894	0	1120
maker-tulip_contig_33_pilon_pilon-augustus-gene-0.21-mRNA-1	XP_022827988.1 triadin-like [Spodoptera litura]	XP_022827988.1	81.18	595	107	4	1	590	1	595	0	837
augustus_masked-tulip_contig_33_pilon_pilon-processed-gene-0.2-mRNA-1	PZC84322.1 hypothetical protein B5X24_HaOG205517 [Helicoverpa armigera]	PZC84322.1	45.2	250	127	3	1	244	42	287	5e-56	194
maker-tulip_contig_33_pilon_pilon-augustus-gene-0.24-mRNA-1	XP_022819099.1 uncharacterized protein LOC111351408 isoform X1 [Spodoptera litura]	XP_022819099.1	88.56	271	27	2	1	267	24	294	1e-173	491
maker-tulip_contig_33_pilon_pilon-augustus-gene-0.27-mRNA-1	XP_022819125.1 uncharacterized protein LOC111351432 [Spodoptera litura]	XP_022819125.1	95.67	231	10	0	1	231	1	231	1e-158	449
maker-tulip_contig_33_pilon_pilon-augustus-gene-0.28-mRNA-1	XP_022819079.1 cap-specific mRNA (nucleoside-2'-O-)-methyltransferase 2 [Spodoptera litura]	XP_022819079.1	95.69	696	30	0	1	696	1	696	0	1386
augustus_masked-tulip_contig_33_pilon_pilon-processed-gene-0.6-mRNA-1	XP_022821272.1 nuclear pore complex protein Nup205 [Spodoptera litura]	XP_022821272.1	87.59	822	34	3	1	754	1	822	0	1323
maker-tulip_contig_33_pilon_pilon-augustus-gene-0.67-mRNA-1	PZC79622.1 hypothetical protein B5X24_HaOG216146 [Helicoverpa armigera]	PZC79622.1	74.04	547	121	7	4	533	24	566	0	775
maker-tulip_contig_33_pilon_pilon-augustus-gene-0.69-mRNA-1	XP_026753633.1 innexin shaking-B-like, partial [Galleria mellonella]	XP_026753633.1	97	100	3	0	14	113	1	100	5e-66	206
augustus_masked-tulip_contig_33_pilon_pilon-processed-gene-0.9-mRNA-1	XP_026764511.1 innexin shaking-B-like [Galleria mellonella]	XP_026764511.1	94.62	130	7	0	1	130	1	130	8e-86	257
maker-tulip_contig_33_pilon_pilon-augustus-gene-0.71-mRNA-1	XP_022826824.1 innexin shaking-B isoform X2 [Spodoptera litura]	XP_022826824.1	98.85	174	2	0	1	174	192	365	2e-119	352
maker-tulip_contig_33_pilon_pilon-augustus-gene-0.72-mRNA-1	PCG68609.1 hypothetical protein B5V51_5031 [Heliothis virescens]	PCG68609.1	74.45	869	184	5	1	865	1	835	0	1352
maker-tulip_contig_33_pilon_pilon-augustus-gene-0.75-mRNA-1	XP_022827999.1 heterogeneous nuclear ribonucleoprotein A1-like isoform X1 [Spodoptera litura]	XP_022827999.1	98.35	364	6	0	1	364	1	364	0	739
maker-tulip_contig_33_pilon_pilon-augustus-gene-0.78-mRNA-1	XP_022827976.1 raf homolog serine/threonine-protein kinase phl isoform X2 [Spodoptera litura]	XP_022827976.1	99.48	194	1	0	1	194	1	194	5e-131	397
maker-tulip_contig_33_pilon_pilon-augustus-gene-0.85-mRNA-1	XP_022819134.1 U3 small nucleolar ribonucleoprotein protein IMP3 [Spodoptera litura]	XP_022819134.1	98.9	182	2	0	1	182	1	182	6e-130	372
augustus_masked-tulip_contig_33_pilon_pilon-processed-gene-0.15-mRNA-1	XP_022819090.1 RNA-binding protein 45-like [Spodoptera litura]	XP_022819090.1	95.84	505	21	0	1	505	1	505	0	1009
maker-tulip_contig_33_pilon_pilon-augustus-gene-0.87-mRNA-1	PCG76969.1 hypothetical protein B5V51_8296 [Heliothis virescens]	PCG76969.1	64.97	177	62	0	106	282	245	421	1e-74	254
maker-tulip_contig_33_pilon_pilon-augustus-gene-0.90-mRNA-1	XP_022827685.1 uncharacterized protein LOC111357291 [Spodoptera litura]	XP_022827685.1	88.06	268	18	1	4	257	5	272	9e-160	454
augustus_masked-tulip_contig_33_pilon_pilon-processed-gene-0.18-mRNA-1	XP_022823908.1 uncharacterized protein LOC111354594 [Spodoptera litura]	XP_022823908.1	100	43	0	0	26	68	555	597	6e-19	87.8
maker-tulip_contig_33_pilon_pilon-augustus-gene-0.92-mRNA-1	XP_022820245.1 innexin inx1 [Spodoptera litura]	XP_022820245.1	99.02	102	1	0	1	102	172	273	3e-68	218
augustus_masked-tulip_contig_33_pilon_pilon-processed-gene-1.0-mRNA-1	AAP40732.1 innexin [Spodoptera frugiperda]	AAP40732.1	97.77	359	8	0	1	359	1	359	0	722
augustus_masked-tulip_contig_33_pilon_pilon-processed-gene-1.1-mRNA-1	XP_022823705.1 methyltransferase-like protein 6 [Spodoptera litura]	XP_022823705.1	94.66	281	15	0	1	281	1	281	0	564
augustus_masked-tulip_contig_33_pilon_pilon-processed-gene-1.2-mRNA-1	XP_026729233.1 uncharacterized protein LOC113494913 [Trichoplusia ni]	XP_026729233.1	47.12	295	133	4	1	291	1	276	1e-74	246
maker-tulip_contig_33_pilon_pilon-augustus-gene-1.28-mRNA-1	XP_022820751.1 nucleolar complex protein 4 homolog B [Spodoptera litura]	XP_022820751.1	94.34	512	11	1	1	512	1	494	0	991
maker-tulip_contig_33_pilon_pilon-augustus-gene-1.32-mRNA-1	XP_022822199.1 putative RNA polymerase II subunit B1 CTD phosphatase RPAP2 [Spodoptera litura]	XP_022822199.1	84.67	613	73	2	1	593	1	612	0	1004
maker-tulip_contig_33_pilon_pilon-augustus-gene-1.33-mRNA-1	XP_022827249.1 adenylate kinase 8 [Spodoptera litura]	XP_022827249.1	70	140	30	2	1	129	1	139	4e-60	201
maker-tulip_contig_33_pilon_pilon-augustus-gene-1.34-mRNA-1	XP_022827249.1 adenylate kinase 8 [Spodoptera litura]	XP_022827249.1	90.53	285	25	1	7	289	140	424	0	522
maker-tulip_contig_33_pilon_pilon-augustus-gene-1.41-mRNA-1	XP_022824816.1 histone-lysine N-methyltransferase EHMT1 isoform X1 [Spodoptera litura]	XP_022824816.1	79.47	638	61	5	1	568	1	638	0	924
augustus_masked-tulip_contig_33_pilon_pilon-processed-gene-1.9-mRNA-1	XP_022817048.1 histidine decarboxylase isoform X1 [Spodoptera litura]	XP_022817048.1	98.08	365	7	0	1	365	515	879	0	740
maker-tulip_contig_33_pilon_pilon-augustus-gene-1.48-mRNA-1	XP_022827477.1 innexin inx7-like [Spodoptera litura]	XP_022827477.1	65.23	417	50	6	1	324	1	415	1e-176	506
maker-tulip_contig_33_pilon_pilon-augustus-gene-1.50-mRNA-1	XP_022822535.1 probable ribosome production factor 1 [Spodoptera litura]	XP_022822535.1	99.07	108	1	0	50	157	173	280	1e-72	229
maker-tulip_contig_33_pilon_pilon-augustus-gene-1.53-mRNA-1	XP_022824034.1 116 kDa U5 small nuclear ribonucleoprotein component [Spodoptera litura]	XP_022824034.1	99.68	316	1	0	47	362	661	976	0	656
maker-tulip_contig_33_pilon_pilon-augustus-gene-1.55-mRNA-1	XP_022824034.1 116 kDa U5 small nuclear ribonucleoprotein component [Spodoptera litura]	XP_022824034.1	99.53	213	1	0	11	223	223	435	1e-145	440
augustus_masked-tulip_contig_33_pilon_pilon-processed-gene-1.16-mRNA-1	XP_013144213.1 PREDICTED: 116 kDa U5 small nuclear ribonucleoprotein component-like, partial [Papilio polytes]	XP_013144213.1	87.66	235	19	1	1	235	1	225	5e-134	396
maker-tulip_contig_33_pilon_pilon-augustus-gene-1.73-mRNA-1	XP_022825696.1 uncharacterized protein LOC111355842 [Spodoptera litura]	XP_022825696.1	98.88	269	3	0	18	286	75	343	0	555
maker-tulip_contig_33_pilon_pilon-augustus-gene-1.75-mRNA-1	XP_021188149.1 folylpolyglutamate synthase, mitochondrial-like isoform X1 [Helicoverpa armigera]	XP_021188149.1	71.98	521	74	4	1	449	1	521	0	745
maker-tulip_contig_33_pilon_pilon-augustus-gene-1.77-mRNA-1	AAN86047.1 heat shock cognate 70 protein [Spodoptera frugiperda]	AAN86047.1	99.7	659	2	0	8	666	1	659	0	1339
maker-tulip_contig_33_pilon_pilon-augustus-gene-1.79-mRNA-1	XP_022827233.1 delta-aminolevulinic acid dehydratase [Spodoptera litura]	XP_022827233.1	95.96	322	13	0	1	322	1	322	0	625
maker-tulip_contig_33_pilon_pilon-augustus-gene-1.81-mRNA-1	XP_022816830.1 flocculation protein FLO11 [Spodoptera litura]	XP_022816830.1	94.94	988	34	3	1	988	77	1048	0	1710
maker-tulip_contig_33_pilon_pilon-augustus-gene-2.0-mRNA-1	XP_022835409.1 homeobox protein E60-like, partial [Spodoptera litura]	XP_022835409.1	100	34	0	0	1	34	100	133	6e-15	70.9
augustus_masked-tulip_contig_33_pilon_pilon-processed-gene-2.16-mRNA-1	XP_026736837.1 uncharacterized protein LOC113500301 [Trichoplusia ni]	XP_026736837.1	98.41	126	2	0	1	126	339	464	2e-85	266
maker-tulip_contig_33_pilon_pilon-augustus-gene-2.2-mRNA-1	XP_022816829.1 uncharacterized protein LOC111349810 [Spodoptera litura]	XP_022816829.1	89.04	812	68	6	58	850	1481	2290	0	1313
augustus_masked-tulip_contig_33_pilon_pilon-processed-gene-2.17-mRNA-1	XP_021187399.1 uncharacterized protein K02A2.6-like [Helicoverpa armigera]	XP_021187399.1	95.36	151	7	0	1	151	31	181	7e-98	301
maker-tulip_contig_33_pilon_pilon-augustus-gene-2.4-mRNA-1	XP_026742022.1 uncharacterized protein LOC113504107 [Trichoplusia ni]	XP_026742022.1	75.59	295	50	6	1	292	50	325	2e-140	438
maker-tulip_contig_33_pilon_pilon-augustus-gene-2.5-mRNA-1	XP_022816829.1 uncharacterized protein LOC111349810 [Spodoptera litura]	XP_022816829.1	84.29	891	117	9	1	882	3	879	0	1328
maker-tulip_contig_33_pilon_pilon-augustus-gene-2.6-mRNA-1	XP_022817163.1 peptidyl-prolyl cis-trans isomerase CWC27 homolog isoform X2 [Spodoptera litura]	XP_022817163.1	94.46	505	27	1	1	505	1	504	0	859
augustus_masked-tulip_contig_33_pilon_pilon-processed-gene-2.21-mRNA-1	XP_022817324.1 probable chitinase 2 [Spodoptera litura]	XP_022817324.1	58.22	225	73	5	96	314	301	510	3e-70	236
augustus_masked-tulip_contig_33_pilon_pilon-processed-gene-2.22-mRNA-1	XP_021180829.1 segmentation polarity homeobox protein engrailed-like [Helicoverpa armigera]	XP_021180829.1	97.22	108	3	0	2	109	264	371	8e-68	217
augustus_masked-tulip_contig_33_pilon_pilon-processed-gene-2.23-mRNA-1	XP_022817253.1 segmentation polarity homeobox protein engrailed-like [Spodoptera litura]	XP_022817253.1	98.87	265	3	0	1	265	1	265	0	546
augustus_masked-tulip_contig_33_pilon_pilon-processed-gene-3.1-mRNA-1	XP_022816998.1 zinc transporter foi [Spodoptera litura]	XP_022816998.1	90.52	686	12	2	1	633	1	686	0	1268
augustus_masked-tulip_contig_33_pilon_pilon-processed-gene-3.2-mRNA-1	XP_022829228.1 elongator complex protein 4 [Spodoptera litura]	XP_022829228.1	89.44	360	25	2	1	347	1	360	0	660
augustus_masked-tulip_contig_33_pilon_pilon-processed-gene-3.3-mRNA-1	XP_022830836.1 uncharacterized protein LOC111359493 [Spodoptera litura]	XP_022830836.1	55.56	270	119	1	2	270	7	276	1e-97	299
maker-tulip_contig_33_pilon_pilon-augustus-gene-3.28-mRNA-1	XP_022829403.1 heat shock protein 75 kDa, mitochondrial [Spodoptera litura]	XP_022829403.1	91.51	707	39	1	1	686	1	707	0	1325
maker-tulip_contig_33_pilon_pilon-augustus-gene-3.31-mRNA-1	ALH43426.1 neurotactin [Spodoptera littoralis]	ALH43426.1	96.11	745	29	0	1	745	1	745	0	1386
maker-tulip_contig_33_pilon_pilon-augustus-gene-3.33-mRNA-1	AAK92179.1 ribosomal protein S10 [Spodoptera frugiperda]	AAK92179.1	100	158	0	0	1	158	1	158	6e-112	325
maker-tulip_contig_33_pilon_pilon-augustus-gene-3.35-mRNA-1	XP_022828921.1 synembryn-A [Spodoptera litura]	XP_022828921.1	93.3	552	18	1	1	533	1	552	0	996
maker-tulip_contig_33_pilon_pilon-augustus-gene-3.37-mRNA-1	XP_022829705.1 spondin-1-like isoform X3 [Spodoptera litura]	XP_022829705.1	91.88	800	30	1	19	783	5	804	0	1519
augustus_masked-tulip_contig_33_pilon_pilon-processed-gene-3.10-mRNA-1	XP_022829426.1 myosin-3-like isoform X3 [Spodoptera litura]	XP_022829426.1	77.53	850	118	12	1	780	34	880	0	1230
maker-tulip_contig_33_pilon_pilon-augustus-gene-3.43-mRNA-1	XP_022817274.1 AP-3 complex subunit sigma-1 isoform X1 [Spodoptera litura]	XP_022817274.1	99.03	103	1	0	24	126	92	194	3e-67	211
augustus_masked-tulip_contig_33_pilon_pilon-processed-gene-3.11-mRNA-1	XP_022829622.1 protein krueppel-like [Spodoptera litura]	XP_022829622.1	100	277	0	0	1	277	22	298	0	560
maker-tulip_contig_33_pilon_pilon-augustus-gene-3.45-mRNA-1	XP_022829490.1 SUN domain-containing protein 2-like [Spodoptera litura]	XP_022829490.1	85.28	326	28	2	1	322	1	310	0	541
maker-tulip_contig_33_pilon_pilon-augustus-gene-3.48-mRNA-1	XP_022829489.1 eukaryotic translation initiation factor 3 subunit M [Spodoptera litura]	XP_022829489.1	93.26	386	3	1	1	363	1	386	0	736
maker-tulip_contig_33_pilon_pilon-augustus-gene-3.51-mRNA-1	XP_022829402.1 neurogenic protein mastermind-like [Spodoptera litura]	XP_022829402.1	97.56	369	7	2	2	369	342	709	0	692
maker-tulip_contig_33_pilon_pilon-augustus-gene-3.52-mRNA-1	XP_022829402.1 neurogenic protein mastermind-like [Spodoptera litura]	XP_022829402.1	99.07	324	3	0	31	354	22	345	0	677
maker-tulip_contig_33_pilon_pilon-augustus-gene-3.53-mRNA-1	XP_022829014.1 myosin-J heavy chain-like [Spodoptera litura]	XP_022829014.1	92.5	720	51	2	1	720	1	717	0	1280
maker-tulip_contig_33_pilon_pilon-augustus-gene-3.56-mRNA-1	XP_021184676.1 splicing factor 3A subunit 2 [Helicoverpa armigera]	XP_021184676.1	100	261	0	0	1	261	1	261	0	536
maker-tulip_contig_33_pilon_pilon-augustus-gene-3.58-mRNA-1	XP_022828922.1 NADH dehydrogenase [ubiquinone] 1 alpha subcomplex subunit 9, mitochondrial [Spodoptera litura]	XP_022828922.1	94.74	399	21	0	1	399	1	399	0	800
augustus_masked-tulip_contig_33_pilon_pilon-processed-gene-3.20-mRNA-1	XP_022829361.1 zinc transporter 1 [Spodoptera litura]	XP_022829361.1	100	225	0	0	1	225	1	225	7e-157	451
augustus_masked-tulip_contig_33_pilon_pilon-processed-gene-3.21-mRNA-1	XP_026744036.1 uncharacterized protein LOC113505496 [Trichoplusia ni]	XP_026744036.1	74.57	173	21	1	1	150	1	173	6e-78	246
maker-tulip_contig_33_pilon_pilon-augustus-gene-4.0-mRNA-1	XP_022829663.1 myosin-15-like isoform X4 [Spodoptera litura]	XP_022829663.1	86.72	919	96	6	1	895	1	917	0	1523
maker-tulip_contig_33_pilon_pilon-augustus-gene-4.3-mRNA-1	XP_022829109.1 uncharacterized protein LOC111358277 [Spodoptera litura]	XP_022829109.1	86.3	825	113	0	1	825	1	825	0	1490
augustus_masked-tulip_contig_33_pilon_pilon-processed-gene-4.59-mRNA-1	XP_022833017.1 uncharacterized protein LOC111360950 [Spodoptera litura]	XP_022833017.1	76.18	382	91	0	1	382	1	382	0	620
maker-tulip_contig_33_pilon_pilon-augustus-gene-4.6-mRNA-1	XP_022829547.1 coiled-coil domain-containing protein 94 [Spodoptera litura]	XP_022829547.1	72.26	310	32	3	30	285	1	310	2e-126	372
maker-tulip_contig_33_pilon_pilon-augustus-gene-4.9-mRNA-1	RVE51909.1 hypothetical protein evm_003375 [Chilo suppressalis]	RVE51909.1	53.12	64	20	2	1	57	100	160	0.0002	47.4
augustus_masked-tulip_contig_33_pilon_pilon-processed-gene-4.63-mRNA-1	XP_022828929.1 G1/S-specific cyclin-D3 [Spodoptera litura]	XP_022828929.1	100	153	0	0	1	153	1	153	4e-104	310
augustus_masked-tulip_contig_33_pilon_pilon-processed-gene-4.64-mRNA-1	XP_004927930.1 G1/S-specific cyclin-D3 [Bombyx mori]	XP_004927930.1	72.5	80	19	2	5	84	134	210	8e-26	109
maker-tulip_contig_33_pilon_pilon-augustus-gene-4.11-mRNA-1	XP_022828929.1 G1/S-specific cyclin-D3 [Spodoptera litura]	XP_022828929.1	96.04	101	4	0	16	116	208	308	1e-64	207
maker-tulip_contig_33_pilon_pilon-augustus-gene-4.14-mRNA-1	XP_022828876.1 39S ribosomal protein L28, mitochondrial [Spodoptera litura]	XP_022828876.1	98.93	281	3	0	1	281	1	281	0	576
augustus_masked-tulip_contig_33_pilon_pilon-processed-gene-4.67-mRNA-1	XP_022829649.1 uncharacterized protein LOC111358654 [Spodoptera litura]	XP_022829649.1	87.11	256	31	1	1	254	1	256	1e-152	436
maker-tulip_contig_33_pilon_pilon-augustus-gene-4.15-mRNA-1	XP_022829077.1 adenylate cyclase type 9 isoform X1 [Spodoptera litura]	XP_022829077.1	97.24	1448	33	2	1	1442	1	1447	0	2931
maker-tulip_contig_33_pilon_pilon-augustus-gene-4.18-mRNA-1	XP_022829486.1 gamma-aminobutyric acid receptor subunit beta-like [Spodoptera litura]	XP_022829486.1	99.46	185	1	0	1	185	1	185	5e-132	390
maker-tulip_contig_33_pilon_pilon-augustus-gene-4.19-mRNA-1	XP_022829486.1 gamma-aminobutyric acid receptor subunit beta-like [Spodoptera litura]	XP_022829486.1	87.96	299	1	1	7	270	187	485	0	524
maker-tulip_contig_33_pilon_pilon-augustus-gene-4.25-mRNA-1	XP_022829670.1 low-density lipoprotein receptor-related protein 4 [Spodoptera litura]	XP_022829670.1	97.13	1917	38	4	1	1902	1	1915	0	3859
maker-tulip_contig_33_pilon_pilon-augustus-gene-4.28-mRNA-1	XP_022829676.1 uncharacterized protein LOC111358671 [Spodoptera litura]	XP_022829676.1	89.05	274	27	1	1	274	1	271	1e-172	488
augustus_masked-tulip_contig_33_pilon_pilon-processed-gene-4.73-mRNA-1	XP_022829675.1 pyridine nucleotide-disulfide oxidoreductase domain-containing protein 1 [Spodoptera litura]	XP_022829675.1	95.97	472	19	0	1	472	1	472	0	946
maker-tulip_contig_33_pilon_pilon-augustus-gene-4.30-mRNA-1	PCG76412.1 hypothetical protein B5V51_9587 [Heliothis virescens]	PCG76412.1	76.61	218	10	1	1	177	1	218	5e-116	338
augustus_masked-tulip_contig_33_pilon_pilon-processed-gene-4.75-mRNA-1	XP_026313837.1 proton channel OtopLc-like isoform X2 [Hyposmocoma kahamanoa]	XP_026313837.1	97.37	76	2	0	1	76	1	76	1e-44	160
maker-tulip_contig_33_pilon_pilon-augustus-gene-4.32-mRNA-1	XP_022829422.1 myosin heavy chain, striated muscle-like [Spodoptera litura]	XP_022829422.1	87.38	824	93	4	1	816	234	1054	0	1395
maker-tulip_contig_33_pilon_pilon-augustus-gene-4.33-mRNA-1	XP_022829422.1 myosin heavy chain, striated muscle-like [Spodoptera litura]	XP_022829422.1	59.07	215	33	4	1	162	1	213	1e-69	235
maker-tulip_contig_33_pilon_pilon-augustus-gene-4.42-mRNA-1	JAT11203.1 hypothetical protein g.53049, partial [Graphocephala atropunctata]	JAT11203.1	52.17	299	141	2	6	303	9	306	8e-114	341
maker-tulip_contig_33_pilon_pilon-augustus-gene-4.43-mRNA-1	XP_022829491.1 golgin subfamily A member 4-like isoform X1 [Spodoptera litura]	XP_022829491.1	91.2	2740	235	4	9	2744	84	2821	0	4923
augustus_masked-tulip_contig_33_pilon_pilon-processed-gene-4.79-mRNA-1	XP_025602428.1 probable phosphorylase b kinase regulatory subunit alpha isoform X4 [Athalia rosae]	XP_025602428.1	67.4	1224	240	14	1	1092	1	1197	0	1626
maker-tulip_contig_33_pilon_pilon-augustus-gene-4.52-mRNA-1	XP_022829418.1 gamma-aminobutyric acid receptor alpha-like [Spodoptera litura]	XP_022829418.1	90.48	557	9	1	13	525	8	564	0	1036
maker-tulip_contig_33_pilon_pilon-augustus-gene-4.53-mRNA-1	XP_022829673.1 sorting nexin-25 isoform X1 [Spodoptera litura]	XP_022829673.1	92.19	743	8	1	1	693	1	743	0	1409
maker-tulip_contig_33_pilon_pilon-augustus-gene-5.0-mRNA-1	XP_022829072.1 otopetrin-2 isoform X2 [Spodoptera litura]	XP_022829072.1	94.34	442	20	1	78	514	303	744	0	861
augustus_masked-tulip_contig_33_pilon_pilon-processed-gene-5.24-mRNA-1	XP_022828998.1 otopetrin-2-like isoform X8 [Spodoptera litura]	XP_022828998.1	97.06	102	3	0	1	102	1	102	9e-66	220
maker-tulip_contig_33_pilon_pilon-augustus-gene-5.2-mRNA-1	XP_022828996.1 uncharacterized protein LOC111358224 isoform X6 [Spodoptera litura]	XP_022828996.1	99.35	918	6	0	1	918	1	918	0	1905
augustus_masked-tulip_contig_33_pilon_pilon-processed-gene-5.27-mRNA-1	XP_022829562.1 uncharacterized protein LOC111358586 [Spodoptera litura]	XP_022829562.1	84.27	89	13	1	15	103	15	102	8e-43	150
maker-tulip_contig_33_pilon_pilon-augustus-gene-5.15-mRNA-1	XP_022829562.1 uncharacterized protein LOC111358586 [Spodoptera litura]	XP_022829562.1	96.58	117	4	0	20	136	171	287	4e-73	229
augustus_masked-tulip_contig_33_pilon_pilon-processed-gene-5.31-mRNA-1	XP_026324610.1 putative nuclease HARBI1 [Hyposmocoma kahamanoa]	XP_026324610.1	80.75	187	20	1	1	171	125	311	7e-106	317
maker-tulip_contig_33_pilon_pilon-augustus-gene-5.18-mRNA-1	XP_026324610.1 putative nuclease HARBI1 [Hyposmocoma kahamanoa]	XP_026324610.1	84.4	109	17	0	1	109	1	109	5e-59	194
augustus_masked-tulip_contig_33_pilon_pilon-processed-gene-5.35-mRNA-1	XP_022825455.1 IQ and AAA domain-containing protein 1-like [Spodoptera litura]	XP_022825455.1	68.05	169	51	1	1	169	38	203	2e-71	241
augustus_masked-tulip_contig_33_pilon_pilon-processed-gene-5.37-mRNA-1	XP_022829378.1 roundabout homolog 1-like [Spodoptera litura]	XP_022829378.1	98.46	1232	19	0	2	1233	1	1232	0	2519
augustus_masked-tulip_contig_365_pilon_pilon-processed-gene-0.0-mRNA-1	PZC70416.1 hypothetical protein B5X24_HaOG216424 [Helicoverpa armigera]	PZC70416.1	52.5	80	35	2	10	88	114	191	4e-12	67.8
maker-tulip_contig_365_pilon_pilon-augustus-gene-0.2-mRNA-1	XP_022825890.1 angiotensin-converting enzyme-like isoform X1 [Spodoptera litura]	XP_022825890.1	88.11	723	27	3	1	664	42	764	0	1287
maker-tulip_contig_560_pilon_pilon-augustus-gene-0.19-mRNA-1	XP_022833254.1 uncharacterized protein LOC111361115 [Spodoptera litura]	XP_022833254.1	93.66	1389	86	2	5	1393	86	1472	0	2505
maker-tulip_contig_560_pilon_pilon-augustus-gene-0.21-mRNA-1	XP_022832961.1 uncharacterized protein LOC111360899 [Spodoptera litura]	XP_022832961.1	51.99	377	148	7	1	371	1	350	2e-112	345
maker-tulip_contig_560_pilon_pilon-augustus-gene-0.22-mRNA-1	XP_022832213.1 laminin subunit alpha [Spodoptera litura]	XP_022832213.1	75.8	1992	113	16	1	1624	1	1991	0	3033
maker-tulip_contig_560_pilon_pilon-augustus-gene-0.27-mRNA-1	XP_022832965.1 uncharacterized protein LOC111360902 isoform X1 [Spodoptera litura]	XP_022832965.1	89.26	512	13	4	1	471	1	511	0	905
augustus_masked-tulip_contig_560_pilon_pilon-processed-gene-0.4-mRNA-1	RVE49487.1 hypothetical protein evm_005828 [Chilo suppressalis]	RVE49487.1	62.14	309	108	4	5	310	29	331	4e-131	390
augustus_masked-tulip_contig_560_pilon_pilon-processed-gene-0.5-mRNA-1	XP_022832893.1 pyruvate dehydrogenase phosphatase regulatory subunit, mitochondrial [Spodoptera litura]	XP_022832893.1	92.77	83	6	0	1	83	1	83	8e-48	170
augustus_masked-tulip_contig_560_pilon_pilon-processed-gene-0.6-mRNA-1	XP_022832893.1 pyruvate dehydrogenase phosphatase regulatory subunit, mitochondrial [Spodoptera litura]	XP_022832893.1	90	260	3	1	130	366	288	547	3e-161	486
augustus_masked-tulip_contig_560_pilon_pilon-processed-gene-0.8-mRNA-1	XP_022832433.1 solute carrier family 35 member C2 [Spodoptera litura]	XP_022832433.1	94.02	234	13	1	1	233	168	401	4e-156	449
maker-tulip_contig_560_pilon_pilon-augustus-gene-0.37-mRNA-1	XP_022832496.1 deformed epidermal autoregulatory factor 1 [Spodoptera litura]	XP_022832496.1	94.67	225	12	0	16	240	238	462	1e-148	433
augustus_masked-tulip_contig_560_pilon_pilon-processed-gene-0.11-mRNA-1	XP_022832496.1 deformed epidermal autoregulatory factor 1 [Spodoptera litura]	XP_022832496.1	97.91	239	5	0	1	239	1	239	3e-170	488
maker-tulip_contig_560_pilon_pilon-augustus-gene-0.39-mRNA-1	XP_022832879.1 uncharacterized protein LOC111360848 [Spodoptera litura]	XP_022832879.1	76.08	301	67	1	1	296	1	301	2e-169	483
augustus_masked-tulip_contig_560_pilon_pilon-processed-gene-0.13-mRNA-1	RVE49487.1 hypothetical protein evm_005828 [Chilo suppressalis]	RVE49487.1	62.41	407	140	6	86	488	19	416	7e-177	514
maker-tulip_contig_560_pilon_pilon-augustus-gene-0.41-mRNA-1	XP_022832780.1 enkurin [Spodoptera litura]	XP_022832780.1	93.31	254	17	0	1	254	1	254	6e-150	429
maker-tulip_contig_560_pilon_pilon-augustus-gene-0.43-mRNA-1	RVE47661.1 hypothetical protein evm_007650 [Chilo suppressalis]	RVE47661.1	34.67	225	111	5	3	208	55	262	3e-25	108
augustus_masked-tulip_contig_560_pilon_pilon-processed-gene-0.16-mRNA-1	XP_022832437.1 uncharacterized protein LOC111360635 [Spodoptera litura]	XP_022832437.1	93.68	253	16	0	1	253	1	253	6e-145	416
maker-tulip_contig_560_pilon_pilon-augustus-gene-0.46-mRNA-1	XP_022833274.1 uncharacterized protein LOC111361127 [Spodoptera litura]	XP_022833274.1	67.45	424	116	4	1	408	1	418	0	576
augustus_masked-tulip_contig_560_pilon_pilon-processed-gene-0.18-mRNA-1	XP_022832227.1 protein KBP homolog [Spodoptera litura]	XP_022832227.1	96.2	553	21	0	1	553	1	553	0	1108
augustus_masked-tulip_contig_560_pilon_pilon-processed-gene-1.16-mRNA-1	XP_022833086.1 uncharacterized protein LOC111361001 [Spodoptera litura]	XP_022833086.1	38.62	681	292	23	8	597	1	646	3e-102	335
augustus_masked-tulip_contig_560_pilon_pilon-processed-gene-1.17-mRNA-1	XP_022832748.1 peroxisomal membrane protein PEX16-like [Spodoptera litura]	XP_022832748.1	93.01	329	23	0	1	329	1	329	0	644
augustus_masked-tulip_contig_560_pilon_pilon-processed-gene-1.18-mRNA-1	XP_022832221.1 LOW QUALITY PROTEIN: titin homolog [Spodoptera litura]	XP_022832221.1	85.99	3056	378	6	7	3018	196	3245	0	5179
maker-tulip_contig_560_pilon_pilon-augustus-gene-1.7-mRNA-1	XP_026745028.1 uncharacterized protein LOC113506381 [Trichoplusia ni]	XP_026745028.1	91.75	97	8	0	1	97	10	106	4e-56	179
maker-tulip_contig_560_pilon_pilon-augustus-gene-1.8-mRNA-1	XP_022832543.1 mitogen-activated protein kinase kinase kinase 12 [Spodoptera litura]	XP_022832543.1	83.05	348	47	3	21	361	211	553	0	594
maker-tulip_contig_560_pilon_pilon-augustus-gene-1.11-mRNA-1	XP_022832543.1 mitogen-activated protein kinase kinase kinase 12 [Spodoptera litura]	XP_022832543.1	92.5	120	9	0	1	120	24	143	1e-72	236
maker-tulip_contig_560_pilon_pilon-augustus-gene-2.16-mRNA-1	XP_022833119.1 tyrosine-protein phosphatase non-receptor type 61F-like isoform X2 [Spodoptera litura]	XP_022833119.1	85.86	99	7	1	1	92	1	99	4e-51	177
augustus_masked-tulip_contig_560_pilon_pilon-processed-gene-2.2-mRNA-1	XP_022833119.1 tyrosine-protein phosphatase non-receptor type 61F-like isoform X2 [Spodoptera litura]	XP_022833119.1	80.32	315	10	2	1	263	84	398	4e-157	456
augustus_masked-tulip_contig_560_pilon_pilon-processed-gene-2.3-mRNA-1	XP_022833022.1 ATP-dependent DNA helicase Q1-like [Spodoptera litura]	XP_022833022.1	93.7	635	40	0	1	635	1	635	0	1249
maker-tulip_contig_560_pilon_pilon-augustus-gene-2.19-mRNA-1	XP_022832937.1 hemicentin-2-like [Spodoptera litura]	XP_022832937.1	49.19	433	174	6	65	461	238	660	9e-137	418
maker-tulip_contig_560_pilon_pilon-augustus-gene-2.21-mRNA-1	XP_022832662.1 uncharacterized protein LOC111360739 [Spodoptera litura]	XP_022832662.1	98.61	144	2	0	1	144	1	144	4e-102	298
maker-tulip_contig_560_pilon_pilon-augustus-gene-2.23-mRNA-1	XP_022832215.1 rho GTPase-activating protein 1-like [Spodoptera litura]	XP_022832215.1	99.04	104	1	0	1	104	99	202	3e-68	220
maker-tulip_contig_560_pilon_pilon-augustus-gene-2.24-mRNA-1	PZC80537.1 hypothetical protein B5X24_HaOG214578 [Helicoverpa armigera]	PZC80537.1	72.93	362	90	4	188	545	105	462	7e-177	517
maker-tulip_contig_560_pilon_pilon-augustus-gene-2.27-mRNA-1	XP_022832881.1 PHD finger protein rhinoceros [Spodoptera litura]	XP_022832881.1	94.31	2479	123	9	17	2489	197	2663	0	4459
maker-tulip_contig_560_pilon_pilon-augustus-gene-2.29-mRNA-1	PZC76586.1 hypothetical protein B5X24_HaOG204426 [Helicoverpa armigera]	PZC76586.1	82.74	168	28	1	10	177	75	241	2e-93	281
maker-tulip_contig_560_pilon_pilon-augustus-gene-2.31-mRNA-1	XP_018006941.1 PREDICTED: extensin-like, partial [Hyalella azteca]	XP_018006941.1	35.94	192	113	2	99	290	19	200	9e-07	58.2
maker-tulip_contig_560_pilon_pilon-augustus-gene-2.34-mRNA-1	XP_022832988.1 peptidyl-prolyl cis-trans isomerase-like 1 [Spodoptera litura]	XP_022832988.1	98.25	171	3	0	1	171	1	171	5e-123	353
augustus_masked-tulip_contig_560_pilon_pilon-processed-gene-2.15-mRNA-1	XP_022830836.1 uncharacterized protein LOC111359493 [Spodoptera litura]	XP_022830836.1	56.67	270	116	1	2	270	7	276	4e-101	308
maker-tulip_contig_560_pilon_pilon-augustus-gene-3.18-mRNA-1	XP_022832540.1 F-BAR and double SH3 domains protein 2 isoform X2 [Spodoptera litura]	XP_022832540.1	97.88	706	14	1	1	705	92	797	0	1429
maker-tulip_contig_560_pilon_pilon-augustus-gene-3.19-mRNA-1	XP_022832540.1 F-BAR and double SH3 domains protein 2 isoform X2 [Spodoptera litura]	XP_022832540.1	97.84	231	5	0	38	268	795	1025	6e-150	455
maker-tulip_contig_560_pilon_pilon-augustus-gene-3.24-mRNA-1	XP_022833084.1 protein GPR107 [Spodoptera litura]	XP_022833084.1	91.6	381	14	1	1	363	1	381	0	720
augustus_masked-tulip_contig_560_pilon_pilon-processed-gene-3.4-mRNA-1	XP_022833010.1 ras-related and estrogen-regulated growth inhibitor [Spodoptera litura]	XP_022833010.1	100	130	0	0	4	133	80	209	6e-91	272
maker-tulip_contig_560_pilon_pilon-augustus-gene-3.28-mRNA-1	XP_022832214.1 nuclear receptor subfamily 2 group E member 1 [Spodoptera litura]	XP_022832214.1	92.08	379	30	0	16	394	6	384	0	683
maker-tulip_contig_560_pilon_pilon-augustus-gene-3.30-mRNA-1	XP_022832354.1 calcium-binding mitochondrial carrier protein SCaMC-2 isoform X1 [Spodoptera litura]	XP_022832354.1	100	167	0	0	1	167	1	167	1e-117	351
maker-tulip_contig_560_pilon_pilon-augustus-gene-3.32-mRNA-1	XP_021185753.1 calcium-binding mitochondrial carrier protein SCaMC-2 isoform X2 [Helicoverpa armigera]	XP_021185753.1	82.72	382	41	2	1	358	1	381	0	643
maker-tulip_contig_560_pilon_pilon-augustus-gene-3.35-mRNA-1	XP_022832438.1 ATP-binding cassette sub-family F member 2 [Spodoptera litura]	XP_022832438.1	99.52	620	3	0	1	620	1	620	0	1290
maker-tulip_contig_560_pilon_pilon-augustus-gene-3.40-mRNA-1	XP_018014045.1 PREDICTED: uncharacterized transmembrane protein DDB_G0289901-like [Hyalella azteca]	XP_018014045.1	32.88	219	136	3	188	403	325	535	1e-16	91.3
augustus_masked-tulip_contig_560_pilon_pilon-processed-gene-3.14-mRNA-1	XP_013195491.1 PREDICTED: mucin-2-like [Amyelois transitella]	XP_013195491.1	64.88	168	59	0	6	173	222	389	5e-67	240
maker-tulip_contig_560_pilon_pilon-augustus-gene-3.42-mRNA-1	XP_022832630.1 atypical kinase COQ8B, mitochondrial isoform X1 [Spodoptera litura]	XP_022832630.1	90.75	670	58	1	1	670	1	666	0	1231
maker-tulip_contig_560_pilon_pilon-augustus-gene-3.45-mRNA-1	XP_022832571.1 protein ABHD16A isoform X4 [Spodoptera litura]	XP_022832571.1	87.45	518	57	1	1	518	1	510	0	957
maker-tulip_contig_114_pilon_pilon-augustus-gene-0.0-mRNA-1	XP_022827806.1 uncharacterized protein LOC111357380 isoform X1 [Spodoptera litura]	XP_022827806.1	97	367	11	0	1	367	1	367	0	734
maker-tulip_contig_114_pilon_pilon-augustus-gene-0.2-mRNA-1	XP_022828049.1 kinesin-like protein KIF20B isoform X2 [Spodoptera litura]	XP_022828049.1	83.3	1449	161	16	1	1370	1	1447	0	2284
maker-tulip_contig_114_pilon_pilon-augustus-gene-0.4-mRNA-1	XP_022828174.1 pre-mRNA-splicing factor Slu7 [Spodoptera litura]	XP_022828174.1	91.9	580	11	2	1	544	1	580	0	1076
maker-tulip_contig_114_pilon_pilon-augustus-gene-0.6-mRNA-1	XP_022827944.1 sorting nexin-12 [Spodoptera litura]	XP_022827944.1	100	166	0	0	1	166	1	166	4e-119	343
augustus_masked-tulip_contig_114_pilon_pilon-processed-gene-0.22-mRNA-1	XP_022828215.1 uncharacterized protein LOC111357665 [Spodoptera litura]	XP_022828215.1	95.88	170	7	0	1	170	11	180	1e-116	338
augustus_masked-tulip_contig_114_pilon_pilon-processed-gene-0.23-mRNA-1	XP_022827777.1 uncharacterized protein LOC111357366 isoform X2 [Spodoptera litura]	XP_022827777.1	100	90	0	0	1	90	1	90	2e-59	186
maker-tulip_contig_114_pilon_pilon-augustus-gene-0.9-mRNA-1	XP_022827769.1 DALR anticodon-binding domain-containing protein 3-like isoform X4 [Spodoptera litura]	XP_022827769.1	89.86	414	42	0	1	414	1	414	0	780
maker-tulip_contig_114_pilon_pilon-augustus-gene-0.10-mRNA-1	PCG80095.1 hypothetical protein B5V51_11227 [Heliothis virescens]	PCG80095.1	90.14	71	0	1	1	71	1	64	6e-36	126
maker-tulip_contig_114_pilon_pilon-augustus-gene-0.13-mRNA-1	XP_022827805.1 adhesion G protein-coupled receptor A3 [Spodoptera litura]	XP_022827805.1	95.53	1632	73	0	1	1632	1	1632	0	3148
augustus_masked-tulip_contig_114_pilon_pilon-processed-gene-0.26-mRNA-1	XP_022163164.1 uncharacterized protein LOC111028731 [Myzus persicae]	XP_022163164.1	32.95	616	378	11	1	592	41	645	4e-102	333
maker-tulip_contig_114_pilon_pilon-augustus-gene-0.15-mRNA-1	RVE48891.1 hypothetical protein evm_006461 [Chilo suppressalis]	RVE48891.1	50.76	786	179	11	17	630	34	783	0	717
maker-tulip_contig_114_pilon_pilon-augustus-gene-0.17-mRNA-1	XP_022828040.1 ashwin-like [Spodoptera litura]	XP_022828040.1	87.42	159	20	0	1	159	1	159	2e-98	290
augustus_masked-tulip_contig_114_pilon_pilon-processed-gene-0.30-mRNA-1	XP_022827775.1 dnaJ homolog subfamily C member 25 homolog [Spodoptera litura]	XP_022827775.1	99.12	339	3	0	1	339	1	339	0	688
augustus_masked-tulip_contig_99_pilon_pilon-processed-gene-0.28-mRNA-1	XP_022823778.1 uncharacterized protein LOC111354514 [Spodoptera litura]	XP_022823778.1	94.79	192	10	0	1	192	58	249	1e-127	369
maker-tulip_contig_99_pilon_pilon-augustus-gene-0.0-mRNA-1	XP_022823721.1 uncharacterized protein LOC111354477 [Spodoptera litura]	XP_022823721.1	86.57	134	18	0	5	138	16	149	6e-84	252
maker-tulip_contig_99_pilon_pilon-augustus-gene-0.2-mRNA-1	RVE53039.1 hypothetical protein evm_002337 [Chilo suppressalis]	RVE53039.1	96.89	161	3	1	5	165	9	167	8e-104	318
augustus_masked-tulip_contig_99_pilon_pilon-processed-gene-0.32-mRNA-1	XP_022823421.1 paired box protein Pax-6-like [Spodoptera litura]	XP_022823421.1	85.29	102	0	1	1	102	392	478	2e-50	174
maker-tulip_contig_99_pilon_pilon-augustus-gene-0.5-mRNA-1	XP_022823734.1 protein goliath isoform X1 [Spodoptera litura]	XP_022823734.1	95.52	67	3	0	67	133	86	152	2e-36	141
maker-tulip_contig_99_pilon_pilon-augustus-gene-0.6-mRNA-1	XP_022823737.1 protein goliath isoform X3 [Spodoptera litura]	XP_022823737.1	94.23	104	5	1	31	134	332	434	2e-55	188
maker-tulip_contig_99_pilon_pilon-augustus-gene-0.8-mRNA-1	XP_022823693.1 tektin-B1-like [Spodoptera litura]	XP_022823693.1	86.07	438	45	1	1	422	1	438	0	773
augustus_masked-tulip_contig_99_pilon_pilon-processed-gene-0.36-mRNA-1	XP_012151860.1 PREDICTED: uncharacterized protein LOC105663967 [Megachile rotundata]	XP_012151860.1	54.97	151	67	1	26	175	92	242	2e-50	172
maker-tulip_contig_99_pilon_pilon-augustus-gene-0.10-mRNA-1	XP_022823943.1 pickpocket protein 28-like [Spodoptera litura]	XP_022823943.1	85.27	482	21	1	33	464	23	504	0	842
maker-tulip_contig_99_pilon_pilon-augustus-gene-0.12-mRNA-1	AXY04240.1 capability/cardioacceleratory peptide 2b [Spodoptera exigua]	AXY04240.1	98.36	61	1	0	10	70	1	61	1e-35	127
maker-tulip_contig_99_pilon_pilon-augustus-gene-0.14-mRNA-1	XP_022823422.1 uncharacterized protein LOC111354294 [Spodoptera litura]	XP_022823422.1	54.94	324	119	7	35	355	11	310	2e-101	324
maker-tulip_contig_99_pilon_pilon-augustus-gene-0.16-mRNA-1	XP_022823417.1 uncharacterized protein LOC111354292 isoform X3 [Spodoptera litura]	XP_022823417.1	87.11	551	38	2	3	520	6	556	0	953
maker-tulip_contig_99_pilon_pilon-augustus-gene-0.19-mRNA-1	XP_022823412.1 protein mini spindles [Spodoptera litura]	XP_022823412.1	88.34	1964	94	12	24	1858	68	2025	0	3392
augustus_masked-tulip_contig_99_pilon_pilon-processed-gene-0.41-mRNA-1	JAT81676.1 hypothetical protein g.6973, partial [Pectinophora gossypiella]	JAT81676.1	94.2	69	4	0	1	69	1	69	1e-39	139
maker-tulip_contig_99_pilon_pilon-augustus-gene-0.22-mRNA-1	APD13880.1 putative carboxylesterase CXE22 [Spodoptera litura]	APD13880.1	94.44	504	28	0	1	504	61	564	0	995
maker-tulip_contig_99_pilon_pilon-augustus-gene-0.24-mRNA-1	XP_021185668.1 histone acetyltransferase KAT2A isoform X2 [Helicoverpa armigera]	XP_021185668.1	72.26	566	40	6	1	451	89	652	0	813
maker-tulip_contig_702_pilon_pilon-augustus-gene-0.38-mRNA-1	ABA62322.1 inhibitor of apoptosis protein [Spodoptera exigua]	ABA62322.1	99.74	378	1	0	1	378	1	378	0	782
maker-tulip_contig_702_pilon_pilon-augustus-gene-0.40-mRNA-1	XP_022828231.1 GATA zinc finger domain-containing protein 14-like [Spodoptera litura]	XP_022828231.1	74.28	1454	253	23	1	1377	1	1410	0	1988
maker-tulip_contig_702_pilon_pilon-augustus-gene-0.42-mRNA-1	XP_021195633.1 uncharacterized protein LOC110380090 [Helicoverpa armigera]	XP_021195633.1	64.31	255	24	2	1	188	1	255	5e-84	258
augustus_masked-tulip_contig_702_pilon_pilon-processed-gene-0.3-mRNA-1	PZC73978.1 hypothetical protein B5X24_HaOG208467 [Helicoverpa armigera]	PZC73978.1	86.7	188	22	1	42	229	1	185	8e-90	272
maker-tulip_contig_702_pilon_pilon-augustus-gene-0.44-mRNA-1	XP_022828316.1 glutamate receptor ionotropic, kainate 3-like [Spodoptera litura]	XP_022828316.1	95.9	903	37	0	1	903	1	903	0	1780
maker-tulip_contig_702_pilon_pilon-augustus-gene-0.47-mRNA-1	PCG73264.1 hypothetical protein B5V51_14987 [Heliothis virescens]	PCG73264.1	68.73	291	37	2	3	293	287	523	4e-116	360
maker-tulip_contig_702_pilon_pilon-augustus-gene-0.48-mRNA-1	XP_022827826.1 glutamate receptor ionotropic, kainate 2 isoform X2 [Spodoptera litura]	XP_022827826.1	99.63	807	3	0	1	807	140	946	0	1681
augustus_masked-tulip_contig_702_pilon_pilon-processed-gene-0.7-mRNA-1	XP_022828367.1 glutamate receptor ionotropic, kainate 2-like [Spodoptera litura]	XP_022828367.1	98.37	613	10	0	168	780	314	926	0	1256
maker-tulip_contig_702_pilon_pilon-augustus-gene-0.52-mRNA-1	XP_022827831.1 glutamate receptor ionotropic, kainate 2-like [Spodoptera litura]	XP_022827831.1	81.74	953	82	8	1	866	1	948	0	1476
maker-tulip_contig_702_pilon_pilon-augustus-gene-0.56-mRNA-1	XP_022828105.1 PI-PLC X domain-containing protein 3-like [Spodoptera litura]	XP_022828105.1	94.39	428	24	0	40	467	20	447	0	842
augustus_masked-tulip_contig_702_pilon_pilon-processed-gene-0.11-mRNA-1	XP_022835582.1 zinc finger protein 271-like isoform X1 [Spodoptera litura]	XP_022835582.1	98.46	325	5	0	1	325	1	325	0	670
maker-tulip_contig_702_pilon_pilon-augustus-gene-0.58-mRNA-1	XP_022835583.1 protein FRA10AC1 homolog isoform X2 [Spodoptera litura]	XP_022835583.1	94.55	220	12	0	1	220	1	220	4e-138	397
maker-tulip_contig_702_pilon_pilon-augustus-gene-0.59-mRNA-1	XP_022835624.1 BRISC complex subunit FAM175B-like [Spodoptera litura]	XP_022835624.1	86.38	389	13	1	1	349	1	389	0	682
maker-tulip_contig_702_pilon_pilon-augustus-gene-0.62-mRNA-1	XP_011564498.1 PREDICTED: uncharacterized protein LOC105394311 [Plutella xylostella]	XP_011564498.1	67.16	335	104	2	110	439	1	334	2e-165	479
maker-tulip_contig_702_pilon_pilon-augustus-gene-0.64-mRNA-1	XP_022834966.1 dihydroorotate dehydrogenase (quinone), mitochondrial [Spodoptera litura]	XP_022834966.1	93.11	392	27	0	1	392	1	392	0	738
maker-tulip_contig_702_pilon_pilon-augustus-gene-0.66-mRNA-1	PCG74153.1 hypothetical protein B5V51_13781 [Heliothis virescens]	PCG74153.1	99.45	181	1	0	14	194	34	214	4e-130	374
augustus_masked-tulip_contig_702_pilon_pilon-processed-gene-0.17-mRNA-1	XP_022834970.1 proto-oncogene tyrosine-protein kinase ROS isoform X1 [Spodoptera litura]	XP_022834970.1	89.64	1824	73	6	5	1721	113	1927	0	3320
maker-tulip_contig_702_pilon_pilon-augustus-gene-0.69-mRNA-1	XP_022834972.1 proto-oncogene tyrosine-protein kinase ROS isoform X2 [Spodoptera litura]	XP_022834972.1	98.68	151	2	0	10	160	2125	2275	4e-96	314
maker-tulip_contig_702_pilon_pilon-augustus-gene-0.76-mRNA-1	RVE54930.1 hypothetical protein evm_000297 [Chilo suppressalis]	RVE54930.1	70.27	750	136	4	1	670	157	899	0	1038
maker-tulip_contig_702_pilon_pilon-augustus-gene-0.82-mRNA-1	XP_022828234.1 monocarboxylate transporter 10-like isoform X2 [Spodoptera litura]	XP_022828234.1	98.17	492	9	0	1	492	171	662	0	1006
augustus_masked-tulip_contig_702_pilon_pilon-processed-gene-0.22-mRNA-1	XP_022828233.1 uncharacterized protein LOC111357677 isoform X1 [Spodoptera litura]	XP_022828233.1	89	300	32	1	1	299	1	300	3e-170	504
augustus_masked-tulip_contig_702_pilon_pilon-processed-gene-0.23-mRNA-1	XP_022825679.1 uncharacterized protein LOC111355833 [Spodoptera litura]	XP_022825679.1	71.66	247	61	1	1	238	4	250	2e-128	374
maker-tulip_contig_702_pilon_pilon-augustus-gene-0.83-mRNA-1	XP_022827832.1 glutamate receptor ionotropic, kainate 3-like [Spodoptera litura]	XP_022827832.1	95.22	942	45	0	1	942	1	942	0	1851
augustus_masked-tulip_contig_702_pilon_pilon-processed-gene-0.25-mRNA-1	XP_022827833.1 glutamate receptor ionotropic, kainate 2-like [Spodoptera litura]	XP_022827833.1	92.96	554	26	1	1	541	54	607	0	1087
augustus_masked-tulip_contig_702_pilon_pilon-processed-gene-0.26-mRNA-1	XP_022828106.1 palmitoleoyl-protein carboxylesterase NOTUM [Spodoptera litura]	XP_022828106.1	96.88	416	13	0	4	419	18	433	0	811
augustus_masked-tulip_contig_702_pilon_pilon-processed-gene-0.27-mRNA-1	XP_022827895.1 protein unc-13 homolog 4B isoform X3 [Spodoptera litura]	XP_022827895.1	89.71	1147	26	5	24	1078	29	1175	0	2095
augustus_masked-tulip_contig_702_pilon_pilon-processed-gene-0.28-mRNA-1	XP_022819924.1 uncharacterized protein LOC111351930 [Spodoptera litura]	XP_022819924.1	95.45	484	22	0	1	484	22	505	0	964
augustus_masked-tulip_contig_702_pilon_pilon-processed-gene-0.29-mRNA-1	XP_022835581.1 uncharacterized protein LOC111363025, partial [Spodoptera litura]	XP_022835581.1	97.32	299	8	0	1	299	1	299	0	603
maker-tulip_contig_702_pilon_pilon-augustus-gene-0.94-mRNA-1	XP_022835587.1 uncharacterized protein LOC111363030 [Spodoptera litura]	XP_022835587.1	88.82	331	17	2	1	330	1	312	5e-154	445
maker-tulip_contig_702_pilon_pilon-augustus-gene-0.95-mRNA-1	XP_022835585.1 ribonuclease H2 subunit A [Spodoptera litura]	XP_022835585.1	96.15	312	12	0	1	312	1	312	0	630
maker-tulip_contig_702_pilon_pilon-augustus-gene-0.97-mRNA-1	XP_021197217.1 cytosolic purine 5'-nucleotidase isoform X3 [Helicoverpa armigera]	XP_021197217.1	84.25	584	55	4	1	553	1	578	0	996
augustus_masked-tulip_contig_702_pilon_pilon-processed-gene-0.33-mRNA-1	XP_022835620.1 cytosolic purine 5'-nucleotidase isoform X1 [Spodoptera litura]	XP_022835620.1	96.59	88	3	0	1	88	1	88	4e-50	173
augustus_masked-tulip_contig_702_pilon_pilon-processed-gene-0.34-mRNA-1	XP_021197199.1 Hermansky-Pudlak syndrome 1 protein homolog isoform X1 [Helicoverpa armigera]	XP_021197199.1	78.35	425	53	2	101	509	193	594	0	620
maker-tulip_contig_702_pilon_pilon-augustus-gene-0.103-mRNA-1	XP_022834968.1 ATP synthase subunit s, mitochondrial [Spodoptera litura]	XP_022834968.1	82.84	204	33	1	1	202	1	204	6e-122	353
maker-tulip_contig_702_pilon_pilon-augustus-gene-0.105-mRNA-1	XP_022834975.1 hexokinase type 2 isoform X1 [Spodoptera litura]	XP_022834975.1	98.45	452	7	0	1	452	1	452	0	927
maker-tulip_contig_702_pilon_pilon-augustus-gene-0.77-mRNA-1	XP_022828232.1 DNA mismatch repair protein Msh2 [Spodoptera litura]	XP_022828232.1	79.62	157	4	1	1	157	30	158	2e-75	251
augustus_masked-tulip_contig_139_pilon_pilon-processed-gene-0.2-mRNA-1	XP_022835166.1 zinc finger BED domain-containing protein 4-like [Spodoptera litura]	XP_022835166.1	92.7	137	10	0	271	407	209	345	7e-83	267
augustus_masked-tulip_contig_139_pilon_pilon-processed-gene-0.3-mRNA-1	KOB69058.1 reverse transcriptase, partial [Operophtera brumata]	KOB69058.1	52.01	548	218	10	85	601	62	595	0	548
augustus_masked-tulip_contig_139_pilon_pilon-processed-gene-0.4-mRNA-1	XP_022826353.1 peptidyl-prolyl cis-trans isomerase G-like [Spodoptera litura]	XP_022826353.1	47.98	173	75	2	1	171	218	377	3e-39	150
maker-tulip_contig_248_pilon_pilon-augustus-gene-0.12-mRNA-1	XP_022826703.1 homeobox protein vnd-like isoform X2 [Spodoptera litura]	XP_022826703.1	98.77	326	4	0	1	326	1	326	0	655
maker-tulip_contig_248_pilon_pilon-augustus-gene-0.16-mRNA-1	XP_022826565.1 uncharacterized protein LOC111356442 isoform X3 [Spodoptera litura]	XP_022826565.1	97.94	291	6	0	1	291	1	291	0	572
augustus_masked-tulip_contig_248_pilon_pilon-processed-gene-0.2-mRNA-1	XP_022826583.1 uncharacterized protein LOC111356453 [Spodoptera litura]	XP_022826583.1	86.3	219	17	1	1	206	1	219	3e-130	375
maker-tulip_contig_248_pilon_pilon-augustus-gene-0.21-mRNA-1	XP_022826651.1 nuclear factor related to kappa-B-binding protein isoform X1 [Spodoptera litura]	XP_022826651.1	82.32	1612	109	11	1	1443	1	1605	0	2286
augustus_masked-tulip_contig_248_pilon_pilon-processed-gene-0.5-mRNA-1	XP_022827189.1 protein TIS11 isoform X2 [Spodoptera litura]	XP_022827189.1	99.13	230	2	0	1	230	30	259	2e-163	462
augustus_masked-tulip_contig_248_pilon_pilon-processed-gene-0.6-mRNA-1	XP_022826896.1 probable methylmalonate-semialdehyde dehydrogenase [acylating], mitochondrial [Spodoptera litura]	XP_022826896.1	85.44	522	8	2	1	454	1	522	0	895
maker-tulip_contig_248_pilon_pilon-augustus-gene-0.26-mRNA-1	PZC73099.1 hypothetical protein B5X24_HaOG210013 [Helicoverpa armigera]	PZC73099.1	97.77	179	4	0	1	179	160	338	4e-124	366
augustus_masked-tulip_contig_248_pilon_pilon-processed-gene-0.8-mRNA-1	XP_021196715.1 serine/threonine-protein phosphatase PP1-beta catalytic subunit isoform X4 [Helicoverpa armigera]	XP_021196715.1	98.05	256	5	0	26	281	55	310	0	526
maker-tulip_contig_248_pilon_pilon-augustus-gene-0.32-mRNA-1	XP_022826939.1 uncharacterized protein LOC111356705 [Spodoptera litura]	XP_022826939.1	97.09	413	12	0	1	413	1	413	0	813
maker-tulip_contig_405_pilon_pilon-augustus-gene-0.17-mRNA-1	XP_022128445.1 bromodomain and WD repeat-containing protein 3 isoform X3 [Pieris rapae]	XP_022128445.1	70.52	743	163	9	1	729	1	701	0	1022
maker-tulip_contig_405_pilon_pilon-augustus-gene-0.19-mRNA-1	PCG79985.1 hypothetical protein B5V51_12791 [Heliothis virescens]	PCG79985.1	60.32	441	146	7	456	870	1038	1475	4e-155	517
augustus_masked-tulip_contig_405_pilon_pilon-processed-gene-0.3-mRNA-1	PCG79985.1 hypothetical protein B5V51_12791 [Heliothis virescens]	PCG79985.1	68.34	518	162	2	2	518	2002	2518	0	720
augustus_masked-tulip_contig_405_pilon_pilon-processed-gene-0.5-mRNA-1	XP_022833167.1 plexin domain-containing protein 2 [Spodoptera litura]	XP_022833167.1	70.98	348	36	4	1	283	152	499	5e-161	470
augustus_masked-tulip_contig_405_pilon_pilon-processed-gene-0.6-mRNA-1	XP_022833183.1 uncharacterized protein LOC111361083 [Spodoptera litura]	XP_022833183.1	77.54	138	29	1	17	152	1	138	2e-73	226
augustus_masked-tulip_contig_405_pilon_pilon-processed-gene-0.7-mRNA-1	XP_022832476.1 protein bric-a-brac 2-like isoform X3 [Spodoptera litura]	XP_022832476.1	100	454	0	0	38	491	1	454	0	949
augustus_masked-tulip_contig_405_pilon_pilon-processed-gene-0.8-mRNA-1	XP_026762918.1 inhibitory POU protein [Galleria mellonella]	XP_026762918.1	100	235	0	0	1	235	13	247	1e-172	485
augustus_masked-tulip_contig_405_pilon_pilon-processed-gene-0.9-mRNA-1	XP_021197499.1 uncharacterized protein LOC110381480 [Helicoverpa armigera]	XP_021197499.1	66.67	96	32	0	1	96	36	131	9e-35	129
maker-tulip_contig_405_pilon_pilon-augustus-gene-0.30-mRNA-1	PCG68426.1 hypothetical protein B5V51_5260, partial [Heliothis virescens]	PCG68426.1	91.41	384	24	4	173	549	2	383	0	706
maker-tulip_contig_405_pilon_pilon-augustus-gene-0.32-mRNA-1	XP_022832304.1 zinc-type alcohol dehydrogenase-like protein C1773.06c [Spodoptera litura]	XP_022832304.1	97.38	382	10	0	1	382	1	382	0	763
augustus_masked-tulip_contig_405_pilon_pilon-processed-gene-0.12-mRNA-1	OWR43207.1 gag protein [Danaus plexippus plexippus]	OWR43207.1	59.67	362	86	10	1	313	14	364	5e-94	301
maker-tulip_contig_405_pilon_pilon-augustus-gene-0.35-mRNA-1	XP_022832308.1 roquin-1 isoform X2 [Spodoptera litura]	XP_022832308.1	60.36	724	88	14	34	561	55	775	0	747
maker-tulip_contig_405_pilon_pilon-augustus-gene-0.37-mRNA-1	XP_022832702.1 uncharacterized protein CG1161-like [Spodoptera litura]	XP_022832702.1	96.83	189	6	0	1	189	1	189	2e-136	389
maker-tulip_contig_405_pilon_pilon-augustus-gene-0.40-mRNA-1	XP_026496203.1 laminin subunit gamma-1 [Vanessa tameamea]	XP_026496203.1	78.17	1635	254	9	6	1540	5	1636	0	2613
maker-tulip_contig_405_pilon_pilon-augustus-gene-0.28-mRNA-1	XP_022833097.1 putative protein 2 isoform X1 [Spodoptera litura]	XP_022833097.1	64.34	129	22	1	1	105	17	145	9e-47	160
augustus_masked-tulip_contig_894_pilon_pilon-processed-gene-0.0-mRNA-1	XP_021196846.1 mitogen-activated protein kinase kinase kinase 11, partial [Helicoverpa armigera]	XP_021196846.1	99.11	225	2	0	1	225	1	225	1e-160	454
maker-tulip_contig_894_pilon_pilon-augustus-gene-0.3-mRNA-1	XP_026741617.1 uncharacterized protein LOC113503733 [Trichoplusia ni]	XP_026741617.1	99.07	108	1	0	1	108	1	108	3e-73	223
augustus_masked-tulip_contig_894_pilon_pilon-processed-gene-0.2-mRNA-1	XP_021198662.1 uncharacterized protein LOC110382384 [Helicoverpa armigera]	XP_021198662.1	56.45	760	325	3	200	959	123	876	0	931
maker-tulip_contig_498_pilon_pilon-augustus-gene-0.0-mRNA-1	XP_022817770.1 post-GPI attachment to proteins factor 6 isoform X1 [Spodoptera litura]	XP_022817770.1	94.9	628	32	0	1	628	180	807	0	1227
maker-tulip_contig_498_pilon_pilon-augustus-gene-0.1-mRNA-1	XP_021190590.1 FERM domain-containing protein 8 [Helicoverpa armigera]	XP_021190590.1	100	159	0	0	1	159	1	159	8e-106	325
augustus_masked-tulip_contig_498_pilon_pilon-processed-gene-0.85-mRNA-1	XP_022817796.1 FERM domain-containing protein 8 [Spodoptera litura]	XP_022817796.1	78.33	420	15	4	1	344	181	600	0	638
augustus_masked-tulip_contig_498_pilon_pilon-processed-gene-0.86-mRNA-1	XP_022817811.1 protein distal antenna [Spodoptera litura]	XP_022817811.1	97.23	506	13	1	1	506	9	513	0	993
maker-tulip_contig_498_pilon_pilon-augustus-gene-0.3-mRNA-1	XP_021190569.1 calcineurin B homologous protein 1 [Helicoverpa armigera]	XP_021190569.1	100	189	0	0	1	189	1	189	1e-134	385
maker-tulip_contig_498_pilon_pilon-augustus-gene-0.4-mRNA-1	XP_022817515.1 uncharacterized protein LOC111350265 [Spodoptera litura]	XP_022817515.1	64.97	374	97	9	733	1079	3	369	9e-147	454
maker-tulip_contig_498_pilon_pilon-augustus-gene-0.9-mRNA-1	XP_013192216.1 PREDICTED: metastasis-associated protein MTA3 [Amyelois transitella]	XP_013192216.1	83.36	757	83	6	1	754	102	818	0	1233
maker-tulip_contig_498_pilon_pilon-augustus-gene-0.11-mRNA-1	XP_022817748.1 eukaryotic initiation factor 4A-III [Spodoptera litura]	XP_022817748.1	100	162	0	0	1	162	1	162	4e-108	332
maker-tulip_contig_498_pilon_pilon-augustus-gene-0.12-mRNA-1	XP_026743350.1 eukaryotic initiation factor 4A-III [Trichoplusia ni]	XP_026743350.1	100	242	0	0	1	242	164	405	6e-177	503
maker-tulip_contig_498_pilon_pilon-augustus-gene-0.15-mRNA-1	XP_022817745.1 DDB1- and CUL4-associated factor 10 isoform X2 [Spodoptera litura]	XP_022817745.1	96.39	305	11	0	1	305	4	308	0	627
augustus_masked-tulip_contig_498_pilon_pilon-processed-gene-0.93-mRNA-1	XP_022817744.1 DDB1- and CUL4-associated factor 10 isoform X1 [Spodoptera litura]	XP_022817744.1	75.83	240	13	1	1	195	371	610	6e-120	362
maker-tulip_contig_498_pilon_pilon-augustus-gene-0.21-mRNA-1	PCG70113.1 hypothetical protein B5V51_3346 [Heliothis virescens]	PCG70113.1	65.35	2918	565	36	1	2531	1	2859	0	3612
maker-tulip_contig_498_pilon_pilon-augustus-gene-0.28-mRNA-1	XP_022817390.1 uncharacterized protein LOC111350190 [Spodoptera litura]	XP_022817390.1	89.59	269	27	1	1	268	1	269	8e-175	493
maker-tulip_contig_498_pilon_pilon-augustus-gene-0.31-mRNA-1	XP_022817705.1 DNA-directed RNA polymerase II subunit RPB7 [Spodoptera litura]	XP_022817705.1	97.45	157	4	0	2	158	3	159	5e-107	313
maker-tulip_contig_498_pilon_pilon-augustus-gene-0.33-mRNA-1	XP_022817479.1 lysM and putative peptidoglycan-binding domain-containing protein 2 isoform X2 [Spodoptera litura]	XP_022817479.1	100	153	0	0	1	153	1	153	3e-108	317
augustus_masked-tulip_contig_498_pilon_pilon-processed-gene-0.102-mRNA-1	XP_022823532.1 uncharacterized protein LOC111354340 [Spodoptera litura]	XP_022823532.1	96.52	115	4	0	1	115	1	115	1e-64	226
maker-tulip_contig_498_pilon_pilon-augustus-gene-0.36-mRNA-1	XP_022817659.1 SAYSvFN domain-containing protein 1 [Spodoptera litura]	XP_022817659.1	92.74	179	13	0	1	179	1	179	2e-108	318
augustus_masked-tulip_contig_498_pilon_pilon-processed-gene-0.104-mRNA-1	XP_022817979.1 dynein regulatory complex subunit 7-like [Spodoptera litura]	XP_022817979.1	88.19	720	65	2	15	718	5	720	0	1303
maker-tulip_contig_498_pilon_pilon-augustus-gene-0.39-mRNA-1	XP_022817981.1 coiled-coil domain-containing protein lobo-like [Spodoptera litura]	XP_022817981.1	88.89	198	20	2	1	197	1	197	3e-124	361
maker-tulip_contig_498_pilon_pilon-augustus-gene-0.40-mRNA-1	XP_022817513.1 protein transport protein Sec23A isoform X1 [Spodoptera litura]	XP_022817513.1	98.31	59	0	1	23	81	715	772	2e-29	118
augustus_masked-tulip_contig_498_pilon_pilon-processed-gene-0.107-mRNA-1	XP_022817514.1 protein transport protein Sec23A isoform X2 [Spodoptera litura]	XP_022817514.1	97.65	383	8	1	1	382	1	383	0	784
maker-tulip_contig_498_pilon_pilon-augustus-gene-0.46-mRNA-1	XP_022817747.1 uncharacterized protein LOC111350408 [Spodoptera litura]	XP_022817747.1	97.67	558	13	0	1	558	1	558	0	1118
augustus_masked-tulip_contig_498_pilon_pilon-processed-gene-0.109-mRNA-1	XP_022817749.1 ubiquitin-conjugating enzyme E2 J1-like [Spodoptera litura]	XP_022817749.1	99.2	250	2	0	1	250	1	250	0	511
maker-tulip_contig_498_pilon_pilon-augustus-gene-0.48-mRNA-1	XP_022817539.1 electron transfer flavoprotein subunit beta [Spodoptera litura]	XP_022817539.1	98.02	253	5	0	1	253	1	253	9e-177	497
maker-tulip_contig_498_pilon_pilon-augustus-gene-0.50-mRNA-1	XP_022817538.1 splicing factor 3B subunit 2 [Spodoptera litura]	XP_022817538.1	87.4	603	20	3	144	691	108	709	0	879
augustus_masked-tulip_contig_498_pilon_pilon-processed-gene-0.111-mRNA-1	XP_022817909.1 nucleoporin GLE1 [Spodoptera litura]	XP_022817909.1	92.02	652	52	0	1	652	1	652	0	1197
augustus_masked-tulip_contig_498_pilon_pilon-processed-gene-0.112-mRNA-1	PZC80790.1 hypothetical protein B5X24_HaOG200934 [Helicoverpa armigera]	PZC80790.1	50	578	284	4	13	588	4	578	0	596
maker-tulip_contig_498_pilon_pilon-augustus-gene-0.53-mRNA-1	XP_022817389.1 protein SEC13 homolog [Spodoptera litura]	XP_022817389.1	98.72	313	4	0	1	313	1	313	0	632
maker-tulip_contig_498_pilon_pilon-augustus-gene-0.54-mRNA-1	XP_021190561.1 ras-related protein Rab-8A isoform X2 [Helicoverpa armigera]	XP_021190561.1	98.68	151	2	0	6	156	61	211	8e-106	311
maker-tulip_contig_498_pilon_pilon-augustus-gene-0.57-mRNA-1	XP_022817702.1 myosin-I heavy chain isoform X2 [Spodoptera litura]	XP_022817702.1	98.22	169	3	0	1	169	2075	2243	4e-102	332
maker-tulip_contig_498_pilon_pilon-augustus-gene-0.59-mRNA-1	XP_022817700.1 myosin-I heavy chain isoform X1 [Spodoptera litura]	XP_022817700.1	83.75	1785	69	12	1	1567	27	1808	0	2859
maker-tulip_contig_498_pilon_pilon-augustus-gene-0.7-mRNA-1	KOB76600.1 Metastasis-associated protein MTA1 [Operophtera brumata]	KOB76600.1	86.36	66	9	0	13	78	18	83	2e-34	122
maker-tulip_contig_173_pilon_pilon-augustus-gene-0.17-mRNA-1	XP_022837634.1 serine/arginine repetitive matrix protein 1 [Spodoptera litura]	XP_022837634.1	78.45	232	23	6	1	211	10	235	2e-99	305
augustus_masked-tulip_contig_173_pilon_pilon-processed-gene-0.2-mRNA-1	XP_022837188.1 uncharacterized protein LOC111364514, partial [Spodoptera litura]	XP_022837188.1	79.39	296	38	5	57	346	77	355	1e-142	418
maker-tulip_contig_173_pilon_pilon-augustus-gene-0.23-mRNA-1	XP_022837631.1 39S ribosomal protein L54, mitochondrial [Spodoptera litura]	XP_022837631.1	90.97	144	12	1	1	144	1	143	1e-75	231
augustus_masked-tulip_contig_173_pilon_pilon-processed-gene-0.6-mRNA-1	XP_026735878.1 beta-1,3-galactosyltransferase 4-like, partial [Trichoplusia ni]	XP_026735878.1	92.47	279	21	0	84	362	26	304	0	525
augustus_masked-tulip_contig_173_pilon_pilon-processed-gene-0.7-mRNA-1	XP_021196390.1 esterase FE4-like [Helicoverpa armigera]	XP_021196390.1	80.63	444	84	1	31	474	17	458	0	758
maker-tulip_contig_173_pilon_pilon-augustus-gene-0.26-mRNA-1	ADR64702.1 antennal esterase CXE5 [Spodoptera exigua]	ADR64702.1	94.46	560	8	2	1	538	1	559	0	1093
maker-tulip_contig_173_pilon_pilon-augustus-gene-0.27-mRNA-1	XP_022837632.1 venom carboxylesterase-6-like isoform X1 [Spodoptera litura]	XP_022837632.1	89.62	106	10	1	13	117	481	586	2e-63	211
maker-tulip_contig_173_pilon_pilon-augustus-gene-0.34-mRNA-1	XP_022837637.1 nicotinamide riboside kinase 1 [Spodoptera litura]	XP_022837637.1	71.83	213	38	2	92	282	1	213	3e-93	285
maker-tulip_contig_173_pilon_pilon-augustus-gene-0.35-mRNA-1	XP_022837638.1 uncharacterized protein LOC111364823 [Spodoptera litura]	XP_022837638.1	77.42	124	9	1	1	105	1	124	1e-55	178
maker-tulip_contig_173_pilon_pilon-augustus-gene-0.38-mRNA-1	XP_021196394.1 uncharacterized protein LOC110380664 isoform X1 [Helicoverpa armigera]	XP_021196394.1	49.63	268	100	8	141	396	75	319	2e-52	189
maker-tulip_contig_173_pilon_pilon-augustus-gene-0.41-mRNA-1	XP_022837189.1 uncharacterized protein LOC111364515 [Spodoptera litura]	XP_022837189.1	64.41	118	23	2	15	132	15	113	1e-34	125
augustus_masked-tulip_contig_173_pilon_pilon-processed-gene-0.14-mRNA-1	XP_022837338.1 alpha/beta-gliadin A-III-like isoform X2 [Spodoptera litura]	XP_022837338.1	77.27	110	22	1	1	107	25	134	5e-26	105
maker-tulip_contig_173_pilon_pilon-augustus-gene-0.43-mRNA-1	XP_022837630.1 outer dense fiber protein 3-like [Spodoptera litura]	XP_022837630.1	95.63	229	10	0	1	229	1	229	4e-156	442
maker-tulip_contig_173_pilon_pilon-augustus-gene-0.45-mRNA-1	XP_013168635.1 PREDICTED: chromaffin granule amine transporter-like [Papilio xuthus]	XP_013168635.1	48.29	292	86	6	8	299	70	296	6e-57	197
maker-tulip_contig_173_pilon_pilon-augustus-gene-0.18-mRNA-1	XP_026735364.1 uncharacterized protein LOC113499191 [Trichoplusia ni]	XP_026735364.1	61.68	107	10	1	1	76	283	389	2e-35	132
augustus_masked-tulip_contig_37_pilon_pilon-processed-gene-0.0-mRNA-1	XP_022826417.1 facilitated trehalose transporter Tret1-like [Spodoptera litura]	XP_022826417.1	90.16	498	48	1	1	497	1	498	0	897
maker-tulip_contig_37_pilon_pilon-augustus-gene-0.15-mRNA-1	XP_022826285.1 uncharacterized protein LOC111356229 [Spodoptera litura]	XP_022826285.1	91.89	185	8	3	22	201	1	183	9e-98	291
maker-tulip_contig_37_pilon_pilon-augustus-gene-0.17-mRNA-1	XP_022826287.1 pupal cuticle protein C1B-like [Spodoptera litura]	XP_022826287.1	95.54	157	4	1	1	154	1	157	8e-63	199
maker-tulip_contig_37_pilon_pilon-augustus-gene-0.19-mRNA-1	XP_026731447.1 A-kinase anchor protein 14-like [Trichoplusia ni]	XP_026731447.1	79.31	87	12	1	1	81	1	87	2e-30	111
maker-tulip_contig_37_pilon_pilon-augustus-gene-0.21-mRNA-1	XP_022826188.1 pyruvate dehydrogenase E1 component subunit beta, mitochondrial [Spodoptera litura]	XP_022826188.1	100	122	0	0	1	122	1	122	2e-80	255
augustus_masked-tulip_contig_37_pilon_pilon-processed-gene-0.5-mRNA-1	XP_022826265.1 uncharacterized protein LOC111356214 [Spodoptera litura]	XP_022826265.1	77.45	204	42	2	1	200	10	213	1e-105	315
maker-tulip_contig_37_pilon_pilon-augustus-gene-0.24-mRNA-1	XP_022826132.1 facilitated trehalose transporter Tret1-2 homolog [Spodoptera litura]	XP_022826132.1	89.26	503	54	0	1	503	1	503	0	924
augustus_masked-tulip_contig_37_pilon_pilon-processed-gene-0.7-mRNA-1	XP_026731441.1 neuropeptide SIFamide receptor-like [Trichoplusia ni]	XP_026731441.1	99.58	237	1	0	1	237	46	282	2e-172	486
augustus_masked-tulip_contig_37_pilon_pilon-processed-gene-0.9-mRNA-1	XP_026726731.1 uncharacterized protein LOC113493109 [Trichoplusia ni]	XP_026726731.1	57.05	312	124	4	18	328	3	305	1e-125	372
augustus_masked-tulip_contig_37_pilon_pilon-processed-gene-0.11-mRNA-1	XP_022826407.1 RYamide receptor-like [Spodoptera litura]	XP_022826407.1	95.65	184	8	0	1	184	1	184	6e-127	366
augustus_masked-tulip_contig_37_pilon_pilon-processed-gene-1.19-mRNA-1	XP_022826265.1 uncharacterized protein LOC111356214 [Spodoptera litura]	XP_022826265.1	88.89	54	6	0	17	70	213	266	4e-24	99.4
augustus_masked-tulip_contig_37_pilon_pilon-processed-gene-1.20-mRNA-1	XP_022826034.1 homeotic protein labial-like [Spodoptera litura]	XP_022826034.1	97.16	211	5	1	1	211	1	210	8e-150	430
augustus_masked-tulip_contig_37_pilon_pilon-processed-gene-1.21-mRNA-1	XP_022826034.1 homeotic protein labial-like [Spodoptera litura]	XP_022826034.1	98.47	131	2	0	84	214	205	335	4e-85	265
maker-tulip_contig_37_pilon_pilon-augustus-gene-1.0-mRNA-1	XP_013185187.1 PREDICTED: piggyBac transposable element-derived protein 3-like [Amyelois transitella]	XP_013185187.1	71.2	250	66	4	1	249	1	245	1e-97	310
maker-tulip_contig_37_pilon_pilon-augustus-gene-1.1-mRNA-1	XP_022826189.1 phenylalanine--tRNA ligase alpha subunit [Spodoptera litura]	XP_022826189.1	87.17	491	7	2	1	435	1	491	0	858
maker-tulip_contig_37_pilon_pilon-augustus-gene-1.5-mRNA-1	PCG71488.1 hypothetical protein B5V51_1798 [Heliothis virescens]	PCG71488.1	81.56	537	98	1	1	536	1	537	0	939
maker-tulip_contig_37_pilon_pilon-augustus-gene-1.8-mRNA-1	XP_022825906.1 fragile X mental retardation syndrome-related protein 1 homolog A [Spodoptera litura]	XP_022825906.1	88.02	509	28	3	1	480	1	505	0	886
augustus_masked-tulip_contig_37_pilon_pilon-processed-gene-1.25-mRNA-1	PZC82092.1 hypothetical protein B5X24_HaOG211182 [Helicoverpa armigera]	PZC82092.1	76.53	277	47	2	29	287	70	346	3e-136	424
maker-tulip_contig_37_pilon_pilon-augustus-gene-1.10-mRNA-1	XP_022826154.1 saccharopine dehydrogenase-like oxidoreductase [Spodoptera litura]	XP_022826154.1	70.96	272	38	1	5	276	191	421	3e-134	396
maker-tulip_contig_37_pilon_pilon-augustus-gene-1.12-mRNA-1	XP_022826013.1 GDP-L-fucose synthase [Spodoptera litura]	XP_022826013.1	93.63	157	10	0	13	169	1	157	4e-100	317
augustus_masked-tulip_contig_37_pilon_pilon-processed-gene-1.30-mRNA-1	XP_022825746.1 uncharacterized protein LOC111355883 [Spodoptera litura]	XP_022825746.1	100	81	0	0	5	85	108	188	1e-51	169
maker-tulip_contig_37_pilon_pilon-augustus-gene-1.15-mRNA-1	XP_022825745.1 protein transport protein sft2 [Spodoptera litura]	XP_022825745.1	98.51	202	3	0	1	202	1	202	1e-141	404
maker-tulip_contig_37_pilon_pilon-augustus-gene-1.18-mRNA-1	XP_022834189.1 uncharacterized protein LOC111361957 [Spodoptera litura]	XP_022834189.1	88.4	181	21	0	1	181	1	181	1e-104	322
maker-tulip_contig_37_pilon_pilon-augustus-gene-2.20-mRNA-1	PZC79189.1 hypothetical protein B5X24_HaOG216753 [Helicoverpa armigera]	PZC79189.1	94.67	75	4	0	27	101	1	75	6e-46	151
maker-tulip_contig_37_pilon_pilon-augustus-gene-2.22-mRNA-1	XP_022825771.1 trafficking protein particle complex subunit 1 [Spodoptera litura]	XP_022825771.1	98.62	145	2	0	5	149	1	145	8e-103	300
maker-tulip_contig_37_pilon_pilon-augustus-gene-2.23-mRNA-1	XP_022825768.1 trichohyalin isoform X2 [Spodoptera litura]	XP_022825768.1	84.45	939	68	6	1	861	1	939	0	1552
augustus_masked-tulip_contig_37_pilon_pilon-processed-gene-2.3-mRNA-1	AYM01151.1 glutathione-S-transferase delta class [Spodoptera littoralis]	AYM01151.1	99.54	216	1	0	1	216	8	223	5e-157	444
augustus_masked-tulip_contig_37_pilon_pilon-processed-gene-2.5-mRNA-1	XP_022825791.1 uncharacterized protein LOC111355913 isoform X1 [Spodoptera litura]	XP_022825791.1	91.53	826	51	2	1	826	1	807	0	1591
maker-tulip_contig_37_pilon_pilon-augustus-gene-2.32-mRNA-1	XP_022826005.1 mitochondrial pyruvate carrier 1 [Spodoptera litura]	XP_022826005.1	90	110	11	0	3	112	2	111	3e-69	213
augustus_masked-tulip_contig_37_pilon_pilon-processed-gene-2.7-mRNA-1	PCG70835.1 hypothetical protein B5V51_2527 [Heliothis virescens]	PCG70835.1	55.56	90	40	0	1	90	1	90	2e-20	89.4
maker-tulip_contig_37_pilon_pilon-augustus-gene-2.34-mRNA-1	PCG77797.1 hypothetical protein B5V51_6298 [Heliothis virescens]	PCG77797.1	62.92	89	31	1	65	153	168	254	4e-28	113
maker-tulip_contig_37_pilon_pilon-augustus-gene-2.35-mRNA-1	XP_022826264.1 triadin [Spodoptera litura]	XP_022826264.1	89.04	301	23	2	1	291	1	301	0	524
maker-tulip_contig_37_pilon_pilon-augustus-gene-2.37-mRNA-1	XP_021188718.1 mitochondrial import inner membrane translocase subunit Tim17-B [Helicoverpa armigera]	XP_021188718.1	98.19	166	3	0	1	166	1	166	1e-114	332
augustus_masked-tulip_contig_37_pilon_pilon-processed-gene-2.11-mRNA-1	XP_022825934.1 WD repeat-containing protein 44 isoform X3 [Spodoptera litura]	XP_022825934.1	80.66	760	15	6	8	636	236	994	0	1181
maker-tulip_contig_37_pilon_pilon-augustus-gene-2.45-mRNA-1	XP_022825795.1 glutathione S-transferase 1-1-like [Spodoptera litura]	XP_022825795.1	94.57	221	12	0	1	221	1	221	5e-150	426
maker-tulip_contig_37_pilon_pilon-augustus-gene-2.47-mRNA-1	XP_026759810.1 ras-related protein Rab-11A [Galleria mellonella]	XP_026759810.1	94.09	186	11	0	1	186	1	186	1e-121	353
maker-tulip_contig_37_pilon_pilon-augustus-gene-2.48-mRNA-1	XP_022825794.1 uncharacterized protein LOC111355914 [Spodoptera litura]	XP_022825794.1	89.11	349	23	2	1	334	1	349	0	622
augustus_masked-tulip_contig_37_pilon_pilon-processed-gene-2.15-mRNA-1	RVE49487.1 hypothetical protein evm_005828 [Chilo suppressalis]	RVE49487.1	62.67	359	125	4	5	360	29	381	1e-158	463
maker-tulip_contig_37_pilon_pilon-augustus-gene-2.53-mRNA-1	RVE51729.1 hypothetical protein evm_003532 [Chilo suppressalis]	RVE51729.1	39.83	118	57	3	10	127	23	126	2e-16	80.1
maker-tulip_contig_37_pilon_pilon-augustus-gene-2.55-mRNA-1	XP_026739273.1 uncharacterized protein LOC113502091 [Trichoplusia ni]	XP_026739273.1	90.65	310	25	2	23	331	1076	1382	0	578
maker-tulip_contig_37_pilon_pilon-augustus-gene-2.56-mRNA-1	XP_022822302.1 probable G-protein coupled receptor 158 [Spodoptera litura]	XP_022822302.1	100	178	0	0	5	182	493	670	2e-122	377
augustus_masked-tulip_contig_37_pilon_pilon-processed-gene-3.1-mRNA-1	XP_026746638.1 uncharacterized protein LOC113507901 isoform X1 [Trichoplusia ni]	XP_026746638.1	42.91	254	135	5	23	272	199	446	1e-55	197
augustus_masked-tulip_contig_37_pilon_pilon-processed-gene-3.2-mRNA-1	XP_022835329.1 uncharacterized protein LOC111362815 [Spodoptera litura]	XP_022835329.1	68.51	235	74	0	1	235	72	306	5e-118	355
augustus_masked-tulip_contig_37_pilon_pilon-processed-gene-3.3-mRNA-1	XP_022822370.1 heat shock protein 22-like [Spodoptera litura]	XP_022822370.1	93.73	255	15	1	1	255	1	254	9e-147	421
augustus_masked-tulip_contig_37_pilon_pilon-processed-gene-3.4-mRNA-1	JAA87183.1 retroelement polyprotein, partial [Pararge aegeria]	JAA87183.1	73.53	102	24	2	1	102	48	146	2e-42	147
augustus_masked-tulip_contig_37_pilon_pilon-processed-gene-3.5-mRNA-1	KOB73848.1 Transposon Ty3-I Gag-Pol polyprotein [Operophtera brumata]	KOB73848.1	46.55	275	139	4	4	273	42	313	3e-81	267
maker-tulip_contig_37_pilon_pilon-augustus-gene-3.24-mRNA-1	XP_022821441.1 uncharacterized protein LOC111352949 [Spodoptera litura]	XP_022821441.1	91.18	68	6	0	1	68	1	68	2e-37	129
augustus_masked-tulip_contig_37_pilon_pilon-processed-gene-3.6-mRNA-1	XP_022822339.1 mitotic spindle assembly checkpoint protein MAD2B [Spodoptera litura]	XP_022822339.1	94.9	196	10	0	1	196	1	196	2e-132	380
maker-tulip_contig_37_pilon_pilon-augustus-gene-3.27-mRNA-1	XP_022822302.1 probable G-protein coupled receptor 158 [Spodoptera litura]	XP_022822302.1	98.43	255	4	0	7	261	21	275	2e-180	532
augustus_masked-tulip_contig_37_pilon_pilon-processed-gene-3.8-mRNA-1	ADK55523.1 small heat shock protein [Spodoptera litura]	ADK55523.1	93.67	221	14	0	1	221	1	221	1e-148	423
maker-tulip_contig_37_pilon_pilon-augustus-gene-3.28-mRNA-1	XP_023028833.1 uncharacterized protein LOC111517001 [Leptinotarsa decemlineata]	XP_023028833.1	48.09	314	119	7	1	279	13	317	1e-85	269
augustus_masked-tulip_contig_37_pilon_pilon-processed-gene-3.10-mRNA-1	XP_022822037.1 GRIP domain-containing protein RUD3-like [Spodoptera litura]	XP_022822037.1	89.5	581	59	2	1	579	1	581	0	1068
augustus_masked-tulip_contig_37_pilon_pilon-processed-gene-3.12-mRNA-1	PZC84205.1 hypothetical protein B5X24_HaOG205400 [Helicoverpa armigera]	PZC84205.1	48.78	82	41	1	1	81	1	82	4e-13	67.8
augustus_masked-tulip_contig_37_pilon_pilon-processed-gene-3.13-mRNA-1	XP_022822068.1 uncharacterized protein LOC111353327 [Spodoptera litura]	XP_022822068.1	89.19	111	5	1	1	111	55	158	4e-60	191
maker-tulip_contig_37_pilon_pilon-augustus-gene-3.29-mRNA-1	XP_022822276.1 uncharacterized protein LOC111353462 [Spodoptera litura]	XP_022822276.1	86.62	142	16	2	1	141	1	140	6e-82	247
maker-tulip_contig_37_pilon_pilon-augustus-gene-3.31-mRNA-1	XP_022821439.1 uncharacterized protein LOC111352948 [Spodoptera litura]	XP_022821439.1	99.16	119	1	0	1	119	1	119	1e-79	239
maker-tulip_contig_37_pilon_pilon-augustus-gene-3.32-mRNA-1	XP_022822336.1 tripeptidyl-peptidase 2 isoform X2 [Spodoptera litura]	XP_022822336.1	91.18	964	74	2	1	957	35	994	0	1803
augustus_masked-tulip_contig_37_pilon_pilon-processed-gene-3.20-mRNA-1	XP_022822340.1 gamma-butyrobetaine dioxygenase-like [Spodoptera litura]	XP_022822340.1	95.66	415	18	0	1	415	1	415	0	843
maker-tulip_contig_37_pilon_pilon-augustus-gene-3.37-mRNA-1	XP_022821957.1 probable sulfite oxidase, mitochondrial isoform X1 [Spodoptera litura]	XP_022821957.1	82.26	496	36	2	19	507	103	553	0	843
maker-tulip_contig_37_pilon_pilon-augustus-gene-3.40-mRNA-1	XP_022821959.1 probable sulfite oxidase, mitochondrial isoform X3 [Spodoptera litura]	XP_022821959.1	81.19	101	19	0	1	101	1	101	1e-48	171
augustus_masked-tulip_contig_37_pilon_pilon-processed-gene-3.22-mRNA-1	XP_022821979.1 lipase 3-like [Spodoptera litura]	XP_022821979.1	86.67	405	52	2	1	403	1	405	0	736
augustus_masked-tulip_contig_37_pilon_pilon-processed-gene-3.23-mRNA-1	XP_022821979.1 lipase 3-like [Spodoptera litura]	XP_022821979.1	87.41	405	49	2	1	403	1	405	0	736
maker-tulip_contig_919_pilon_pilon-augustus-gene-0.0-mRNA-1	XP_022833713.1 trypsin-like [Spodoptera litura]	XP_022833713.1	84.73	275	41	1	24	297	2	276	3e-172	488
maker-tulip_contig_338_pilon_pilon-augustus-gene-0.0-mRNA-1	XP_022827728.1 facilitated trehalose transporter Tret1-like [Spodoptera litura]	XP_022827728.1	86.98	430	19	2	1	393	51	480	0	732
augustus_masked-tulip_contig_338_pilon_pilon-processed-gene-0.52-mRNA-1	XP_022827397.1 zinc finger protein on ecdysone puffs isoform X2 [Spodoptera litura]	XP_022827397.1	98.12	213	4	0	1	213	1	213	5e-147	434
augustus_masked-tulip_contig_338_pilon_pilon-processed-gene-0.54-mRNA-1	KOB78223.1 U3 small nucleolar ribonucleoprotein component [Operophtera brumata]	KOB78223.1	74.17	573	93	5	1	567	1	524	0	873
maker-tulip_contig_338_pilon_pilon-augustus-gene-0.11-mRNA-1	XP_022827393.1 NADPH-dependent diflavin oxidoreductase 1 [Spodoptera litura]	XP_022827393.1	81.74	241	8	1	1	205	290	530	1e-131	393
maker-tulip_contig_338_pilon_pilon-augustus-gene-0.21-mRNA-1	XP_026729561.1 G protein-coupled receptor kinase 2 isoform X2 [Trichoplusia ni]	XP_026729561.1	55.19	482	53	8	5	324	137	617	1e-149	444
augustus_masked-tulip_contig_338_pilon_pilon-processed-gene-0.58-mRNA-1	XP_022827420.1 nicotinamide/nicotinic acid mononucleotide adenylyltransferase 3 isoform X2 [Spodoptera litura]	XP_022827420.1	93.85	65	4	0	23	87	107	171	6e-39	139
augustus_masked-tulip_contig_338_pilon_pilon-processed-gene-0.59-mRNA-1	XP_022827419.1 nicotinamide/nicotinic acid mononucleotide adenylyltransferase 1 isoform X1 [Spodoptera litura]	XP_022827419.1	94.44	198	11	0	1	198	281	478	6e-127	376
augustus_masked-tulip_contig_338_pilon_pilon-processed-gene-0.60-mRNA-1	OWR43207.1 gag protein [Danaus plexippus plexippus]	OWR43207.1	67.1	307	79	6	8	302	87	383	3e-101	318
augustus_masked-tulip_contig_338_pilon_pilon-processed-gene-0.61-mRNA-1	XP_022827456.1 erythroid differentiation-related factor 1 [Spodoptera litura]	XP_022827456.1	79.53	1016	78	10	1	892	1	1010	0	1573
augustus_masked-tulip_contig_338_pilon_pilon-processed-gene-0.62-mRNA-1	JAT83812.1 hypothetical protein g.3666 [Pectinophora gossypiella]	JAT83812.1	60.16	123	45	3	1	122	1	120	3e-31	116
maker-tulip_contig_338_pilon_pilon-augustus-gene-0.39-mRNA-1	PZC77150.1 hypothetical protein B5X24_HaOG203704 [Helicoverpa armigera]	PZC77150.1	70.76	472	25	6	10	369	15	485	0	612
maker-tulip_contig_338_pilon_pilon-augustus-gene-0.41-mRNA-1	XP_022827394.1 THO complex subunit 3 [Spodoptera litura]	XP_022827394.1	100	53	0	0	33	85	277	329	1e-29	115
augustus_masked-tulip_contig_338_pilon_pilon-processed-gene-0.65-mRNA-1	XP_022827394.1 THO complex subunit 3 [Spodoptera litura]	XP_022827394.1	97.25	109	3	0	1	109	1	109	1e-71	226
maker-tulip_contig_338_pilon_pilon-augustus-gene-0.45-mRNA-1	PZC77155.1 hypothetical protein B5X24_HaOG203709 [Helicoverpa armigera]	PZC77155.1	73.33	75	20	0	1	75	1	75	3e-35	123
maker-tulip_contig_338_pilon_pilon-augustus-gene-0.47-mRNA-1	XP_022827576.1 uncharacterized protein LOC111357208 [Spodoptera litura]	XP_022827576.1	80.43	1068	198	6	1	1064	1	1061	0	1743
maker-tulip_contig_338_pilon_pilon-augustus-gene-0.49-mRNA-1	XP_022827681.1 methionine--tRNA ligase, mitochondrial [Spodoptera litura]	XP_022827681.1	53.9	397	44	7	87	348	162	554	8e-122	373
augustus_masked-tulip_contig_338_pilon_pilon-processed-gene-1.15-mRNA-1	PZC72433.1 hypothetical protein B5X24_HaOG211216 [Helicoverpa armigera]	PZC72433.1	100	151	0	0	1	151	1	151	3e-99	296
augustus_masked-tulip_contig_338_pilon_pilon-processed-gene-1.18-mRNA-1	XP_021198934.1 transcription factor BTF3 homolog 4-like [Helicoverpa armigera]	XP_021198934.1	98.29	175	3	0	1	175	1	175	1e-119	345
maker-tulip_contig_338_pilon_pilon-augustus-gene-1.0-mRNA-1	XP_022827409.1 TGF-beta-activated kinase 1 and MAP3K7-binding protein 1-like [Spodoptera litura]	XP_022827409.1	87.6	250	18	1	1	237	1	250	1e-154	448
maker-tulip_contig_338_pilon_pilon-augustus-gene-1.1-mRNA-1	XP_022827409.1 TGF-beta-activated kinase 1 and MAP3K7-binding protein 1-like [Spodoptera litura]	XP_022827409.1	98.43	191	2	1	220	409	266	456	2e-126	383
maker-tulip_contig_338_pilon_pilon-augustus-gene-1.4-mRNA-1	PZC72519.1 hypothetical protein B5X24_HaOG211071 [Helicoverpa armigera]	PZC72519.1	86.87	297	36	1	19	315	45	338	0	543
maker-tulip_contig_338_pilon_pilon-augustus-gene-1.8-mRNA-1	XP_022827592.1 beta-1,4-galactosyltransferase 7 [Spodoptera litura]	XP_022827592.1	93.3	224	15	0	1	224	1	224	5e-156	445
augustus_masked-tulip_contig_338_pilon_pilon-processed-gene-1.25-mRNA-1	PZC70403.1 hypothetical protein B5X24_HaOG216501, partial [Helicoverpa armigera]	PZC70403.1	26.24	141	80	4	1	117	1	141	2e-05	48.1
maker-tulip_contig_338_pilon_pilon-augustus-gene-1.10-mRNA-1	XP_026489579.1 26S proteasome regulatory subunit 10B [Vanessa tameamea]	XP_026489579.1	93.23	251	8	1	51	292	141	391	2e-166	478
maker-tulip_contig_338_pilon_pilon-augustus-gene-1.12-mRNA-1	XP_022827481.1 alpha-2Db adrenergic receptor isoform X2 [Spodoptera litura]	XP_022827481.1	99.26	271	2	0	11	281	242	512	0	559
augustus_masked-tulip_contig_338_pilon_pilon-processed-gene-1.29-mRNA-1	XP_022837199.1 uncharacterized protein LOC111364526 [Spodoptera litura]	XP_022837199.1	58.99	317	126	3	1	315	45	359	2e-87	288
maker-tulip_contig_338_pilon_pilon-augustus-gene-1.5-mRNA-1	XP_022827482.1 ommochrome-binding protein-like [Spodoptera litura]	XP_022827482.1	93.2	294	20	0	1	294	1	294	0	569
augustus_masked-tulip_contig_923_pilon_pilon-processed-gene-0.22-mRNA-1	OWR42951.1 elongation factor [Danaus plexippus plexippus]	OWR42951.1	51.92	104	40	3	55	158	30	123	3e-22	99.8
augustus_masked-tulip_contig_923_pilon_pilon-processed-gene-0.23-mRNA-1	JAS83189.1 hypothetical protein g.3563, partial [Homalodisca liturata]	JAS83189.1	56.25	80	32	2	1	77	1	80	2e-15	75.9
augustus_masked-tulip_contig_923_pilon_pilon-processed-gene-0.24-mRNA-1	XP_002401696.1 translation elongation factor, putative, partial [Ixodes scapularis]	XP_002401696.1	37.01	154	86	7	8	153	228	378	3e-10	67
maker-tulip_contig_648_pilon_pilon-augustus-gene-0.0-mRNA-1	PCG76690.1 hypothetical protein B5V51_8910 [Heliothis virescens]	PCG76690.1	78.94	641	76	8	1	585	1	638	0	1005
maker-tulip_contig_648_pilon_pilon-augustus-gene-0.4-mRNA-1	XP_022830166.1 trimethylguanosine synthase-like [Spodoptera litura]	XP_022830166.1	88.8	643	60	3	1	631	1	643	0	1079
augustus_masked-tulip_contig_648_pilon_pilon-processed-gene-0.14-mRNA-1	PZC82329.1 hypothetical protein B5X24_HaOG210632 [Helicoverpa armigera]	PZC82329.1	82.04	646	59	5	1	589	1	646	0	1047
maker-tulip_contig_648_pilon_pilon-augustus-gene-0.7-mRNA-1	AHA48180.1 blue opsin [Spodoptera exigua]	AHA48180.1	100	74	0	0	4	77	309	382	5e-45	157
maker-tulip_contig_648_pilon_pilon-augustus-gene-0.8-mRNA-1	AHA48180.1 blue opsin [Spodoptera exigua]	AHA48180.1	100	197	0	0	1	197	1	197	3e-141	410
maker-tulip_contig_648_pilon_pilon-augustus-gene-1.13-mRNA-1	XP_022829883.1 tyrosine-protein phosphatase Lar isoform X4 [Spodoptera litura]	XP_022829883.1	94.51	1857	21	6	17	1841	250	2057	0	3598
augustus_masked-tulip_contig_648_pilon_pilon-processed-gene-1.4-mRNA-1	XP_022830177.1 mitochondrial cardiolipin hydrolase-like [Spodoptera litura]	XP_022830177.1	86.07	244	29	1	1	239	1	244	4e-151	431
augustus_masked-tulip_contig_648_pilon_pilon-processed-gene-1.5-mRNA-1	XP_022830082.1 mitochondrial thiamine pyrophosphate carrier [Spodoptera litura]	XP_022830082.1	89.13	322	35	0	1	322	1	322	0	604
maker-tulip_contig_648_pilon_pilon-augustus-gene-1.15-mRNA-1	XP_022830147.1 zinc finger protein 572-like isoform X1 [Spodoptera litura]	XP_022830147.1	89.37	715	70	5	3	713	1	713	0	1216
maker-tulip_contig_648_pilon_pilon-augustus-gene-1.16-mRNA-1	XP_022830441.1 exonuclease 1 [Spodoptera litura]	XP_022830441.1	82.89	485	77	2	144	627	220	699	0	809
maker-tulip_contig_648_pilon_pilon-augustus-gene-1.17-mRNA-1	XP_013140096.1 PREDICTED: mediator of RNA polymerase II transcription subunit 10 [Papilio polytes]	XP_013140096.1	100	131	0	0	1	131	1	131	5e-91	269
maker-tulip_contig_648_pilon_pilon-augustus-gene-1.22-mRNA-1	XP_022830117.1 uncharacterized protein LOC111358947 isoform X1 [Spodoptera litura]	XP_022830117.1	96.25	373	11	2	1	373	1	370	0	733
maker-tulip_contig_648_pilon_pilon-augustus-gene-1.12-mRNA-1	PCG74496.1 hypothetical protein B5V51_13220, partial [Heliothis virescens]	PCG74496.1	93.62	47	3	0	1	47	1	47	9e-22	92
maker-tulip_contig_648_pilon_pilon-augustus-gene-2.2-mRNA-1	XP_022830017.1 putative sodium-coupled neutral amino acid transporter 10 [Spodoptera litura]	XP_022830017.1	90.47	944	84	3	1	938	1	944	0	1706
maker-tulip_contig_648_pilon_pilon-augustus-gene-2.6-mRNA-1	XP_022830371.1 protein N-terminal asparagine amidohydrolase isoform X1 [Spodoptera litura]	XP_022830371.1	96.51	315	2	1	1	306	18	332	0	610
maker-tulip_contig_648_pilon_pilon-augustus-gene-2.7-mRNA-1	XP_022830005.1 brain protein I3-like [Spodoptera litura]	XP_022830005.1	99.17	121	1	0	1	121	1	121	2e-75	229
maker-tulip_contig_648_pilon_pilon-augustus-gene-2.9-mRNA-1	XP_022830106.1 uncharacterized protein LOC111358939 [Spodoptera litura]	XP_022830106.1	75.64	275	54	4	1	272	1	265	3e-133	388
augustus_masked-tulip_contig_648_pilon_pilon-processed-gene-2.50-mRNA-1	XP_021186627.1 uncharacterized protein LOC110373630 [Helicoverpa armigera]	XP_021186627.1	91.89	296	24	0	398	693	601	896	0	578
maker-tulip_contig_648_pilon_pilon-augustus-gene-2.12-mRNA-1	XP_022830252.1 adenosine 3'-phospho 5'-phosphosulfate transporter 2 [Spodoptera litura]	XP_022830252.1	89.06	192	16	1	1	192	36	222	2e-113	342
augustus_masked-tulip_contig_648_pilon_pilon-processed-gene-2.51-mRNA-1	XP_022830141.1 tonsoku-like protein [Spodoptera litura]	XP_022830141.1	86.08	1465	93	5	1	1357	1	1462	0	2472
maker-tulip_contig_648_pilon_pilon-augustus-gene-2.17-mRNA-1	XP_022830094.1 U3 small nucleolar RNA-associated protein 6 homolog [Spodoptera litura]	XP_022830094.1	85.89	567	38	2	1	525	1	567	0	948
maker-tulip_contig_648_pilon_pilon-augustus-gene-2.24-mRNA-1	XP_022829773.1 protein ELYS isoform X3 [Spodoptera litura]	XP_022829773.1	84.43	1227	60	7	1	1098	1	1225	0	2187
maker-tulip_contig_648_pilon_pilon-augustus-gene-2.26-mRNA-1	XP_022830370.1 MAP/microtubule affinity-regulating kinase 3 [Spodoptera litura]	XP_022830370.1	97.34	677	17	1	1	676	1	677	0	1372
maker-tulip_contig_648_pilon_pilon-augustus-gene-2.29-mRNA-1	PCG65272.1 hypothetical protein B5V51_9415 [Heliothis virescens]	PCG65272.1	98.01	201	4	0	1	201	1	201	5e-143	407
augustus_masked-tulip_contig_648_pilon_pilon-processed-gene-2.56-mRNA-1	XP_022830321.1 GTP-binding protein Rhes [Spodoptera litura]	XP_022830321.1	100	115	0	0	1	115	1	115	3e-73	233
maker-tulip_contig_648_pilon_pilon-augustus-gene-2.31-mRNA-1	XP_021184143.1 E3 ubiquitin-protein ligase MARCH6 [Helicoverpa armigera]	XP_021184143.1	97.49	517	10	1	1	517	1	514	0	1046
maker-tulip_contig_648_pilon_pilon-augustus-gene-2.35-mRNA-1	XP_021184148.1 tyrosine-protein kinase Src64B isoform X2 [Helicoverpa armigera]	XP_021184148.1	100	117	0	0	5	121	17	133	8e-76	243
augustus_masked-tulip_contig_648_pilon_pilon-processed-gene-2.59-mRNA-1	XP_022830095.1 mitochondrial carrier homolog 2-like [Spodoptera litura]	XP_022830095.1	97.97	295	6	0	1	295	1	295	0	601
maker-tulip_contig_648_pilon_pilon-augustus-gene-2.37-mRNA-1	XP_022830096.1 contactin-associated protein like 5-2 [Spodoptera litura]	XP_022830096.1	97.86	1873	37	2	1	1870	1	1873	0	3828
maker-tulip_contig_828_pilon_pilon-augustus-gene-0.0-mRNA-1	KOB74494.1 Uncharacterized protein OBRU01_09072, partial [Operophtera brumata]	KOB74494.1	40.51	311	119	5	358	603	1	310	5e-70	239
maker-tulip_contig_828_pilon_pilon-augustus-gene-0.1-mRNA-1	XP_022824632.1 alpha-tocopherol transfer protein-like [Spodoptera litura]	XP_022824632.1	94.38	249	14	0	1	249	1	249	7e-174	491
maker-tulip_contig_828_pilon_pilon-augustus-gene-0.2-mRNA-1	KNC25578.1 hypothetical protein FF38_12941, partial [Lucilia cuprina]	KNC25578.1	65.4	263	34	3	16	251	34	266	2e-109	338
maker-tulip_contig_828_pilon_pilon-augustus-gene-0.4-mRNA-1	XP_022824633.1 alpha-tocopherol transfer protein-like [Spodoptera litura]	XP_022824633.1	79.88	169	34	0	1	169	30	198	1e-88	270
maker-tulip_contig_828_pilon_pilon-augustus-gene-0.5-mRNA-1	XP_022824427.1 alpha-tocopherol transfer protein-like [Spodoptera litura]	XP_022824427.1	78.29	281	26	3	1	246	1	281	2e-149	429
maker-tulip_contig_246_pilon_pilon-augustus-gene-0.8-mRNA-1	XP_022828435.1 transcription factor MafK isoform X2 [Spodoptera litura]	XP_022828435.1	70.15	134	26	3	1	128	1	126	1e-52	171
maker-tulip_contig_246_pilon_pilon-augustus-gene-0.11-mRNA-1	XP_022828821.1 glucose dehydrogenase [FAD, quinone]-like [Spodoptera litura]	XP_022828821.1	81.72	580	105	1	67	646	1	579	0	980
maker-tulip_contig_246_pilon_pilon-augustus-gene-0.13-mRNA-1	XP_022828457.1 RNA polymerase-associated protein RTF1 homolog [Spodoptera litura]	XP_022828457.1	90.06	332	33	0	31	362	394	725	7e-179	531
maker-tulip_contig_246_pilon_pilon-augustus-gene-0.14-mRNA-1	XP_022828457.1 RNA polymerase-associated protein RTF1 homolog [Spodoptera litura]	XP_022828457.1	99	200	2	0	1	200	1	200	2e-122	378
maker-tulip_contig_246_pilon_pilon-augustus-gene-0.17-mRNA-1	XP_022828712.1 glucose dehydrogenase [FAD, quinone]-like [Spodoptera litura]	XP_022828712.1	81.9	580	76	1	1	551	1	580	0	1003
maker-tulip_contig_246_pilon_pilon-augustus-gene-0.18-mRNA-1	XP_022835027.1 uncharacterized protein LOC111362564 [Spodoptera litura]	XP_022835027.1	97.01	134	4	0	6	139	39	172	2e-84	273
augustus_masked-tulip_contig_89_pilon_pilon-processed-gene-0.45-mRNA-1	XP_022829999.1 ankyrin repeat domain-containing protein 54-like [Spodoptera litura]	XP_022829999.1	98.12	266	5	0	1	266	1	266	0	541
maker-tulip_contig_89_pilon_pilon-augustus-gene-0.0-mRNA-1	XP_022830158.1 tRNA (cytosine(38)-C(5))-methyltransferase [Spodoptera litura]	XP_022830158.1	96.08	332	13	0	1	332	1	332	0	662
maker-tulip_contig_89_pilon_pilon-augustus-gene-0.1-mRNA-1	XP_022830156.1 maternal protein tudor-like isoform X1 [Spodoptera litura]	XP_022830156.1	95.26	759	35	1	1	759	1	758	0	1520
maker-tulip_contig_89_pilon_pilon-augustus-gene-0.2-mRNA-1	XP_022830156.1 maternal protein tudor-like isoform X1 [Spodoptera litura]	XP_022830156.1	89.27	1678	119	11	3	1621	758	2433	0	2992
maker-tulip_contig_89_pilon_pilon-augustus-gene-0.9-mRNA-1	XP_022830392.1 protein LSM14 homolog A [Spodoptera litura]	XP_022830392.1	98.47	522	8	0	1	522	1	522	0	1060
maker-tulip_contig_89_pilon_pilon-augustus-gene-0.12-mRNA-1	AAK83858.1 ribosomal protein L18 [Spodoptera frugiperda]	AAK83858.1	100	183	0	0	1	183	1	183	2e-127	366
maker-tulip_contig_89_pilon_pilon-augustus-gene-0.15-mRNA-1	PCG73267.1 hypothetical protein B5V51_14967 [Heliothis virescens]	PCG73267.1	83.26	711	113	2	1	706	1	710	0	1253
augustus_masked-tulip_contig_89_pilon_pilon-processed-gene-0.52-mRNA-1	XP_022829985.1 armadillo repeat-containing protein 8-like isoform X3 [Spodoptera litura]	XP_022829985.1	93.7	683	3	1	1	683	1	643	0	1211
maker-tulip_contig_89_pilon_pilon-augustus-gene-0.18-mRNA-1	XP_022830004.1 sphingosine kinase 1 [Spodoptera litura]	XP_022830004.1	97.18	319	9	0	7	325	288	606	0	651
maker-tulip_contig_89_pilon_pilon-augustus-gene-0.25-mRNA-1	XP_022830159.1 protein JTB [Spodoptera litura]	XP_022830159.1	98.72	156	2	0	1	156	1	156	1e-110	321
maker-tulip_contig_89_pilon_pilon-augustus-gene-0.27-mRNA-1	PCG73269.1 hypothetical protein B5V51_14968 [Heliothis virescens]	PCG73269.1	89.08	705	73	4	1	705	381	1081	0	1244
maker-tulip_contig_89_pilon_pilon-augustus-gene-0.30-mRNA-1	PCG79110.1 hypothetical protein B5V51_2026 [Heliothis virescens]	PCG79110.1	48.93	374	156	8	321	668	105	469	1e-109	352
maker-tulip_contig_89_pilon_pilon-augustus-gene-0.34-mRNA-1	XP_022830232.1 kelch-like protein 10 [Spodoptera litura]	XP_022830232.1	99.2	628	5	0	1	628	1	628	0	1310
maker-tulip_contig_89_pilon_pilon-augustus-gene-0.36-mRNA-1	XP_022830233.1 folliculin [Spodoptera litura]	XP_022830233.1	81.4	430	27	1	1	377	1	430	0	719
maker-tulip_contig_89_pilon_pilon-augustus-gene-0.39-mRNA-1	XP_022830121.1 cytochrome c1-2, heme protein, mitochondrial [Spodoptera litura]	XP_022830121.1	97.74	177	4	0	2	178	149	325	6e-125	365
maker-tulip_contig_89_pilon_pilon-augustus-gene-0.40-mRNA-1	XP_022830121.1 cytochrome c1-2, heme protein, mitochondrial [Spodoptera litura]	XP_022830121.1	89.02	164	18	0	1	164	1	164	7e-87	273
maker-tulip_contig_89_pilon_pilon-augustus-gene-1.0-mRNA-1	XP_026736451.1 uncharacterized protein LOC113500008 [Trichoplusia ni]	XP_026736451.1	39.42	208	111	7	93	293	263	462	3e-28	120
augustus_masked-tulip_contig_89_pilon_pilon-processed-gene-1.4-mRNA-1	PCG80976.1 hypothetical protein B5V51_10536 [Heliothis virescens]	PCG80976.1	61.34	344	133	0	10	353	137	480	2e-150	452
maker-tulip_contig_89_pilon_pilon-augustus-gene-1.1-mRNA-1	PCG67494.1 hypothetical protein B5V51_6341, partial [Heliothis virescens]	PCG67494.1	81.65	109	18	1	31	137	1	109	3e-48	165
augustus_masked-tulip_contig_89_pilon_pilon-processed-gene-1.6-mRNA-1	XP_021207105.1 uncharacterized protein LOC110386105 [Bombyx mori]	XP_021207105.1	78.2	211	46	0	262	472	58	268	9e-114	347
augustus_masked-tulip_contig_89_pilon_pilon-processed-gene-2.0-mRNA-1	XP_022829757.1 uncharacterized protein LOC111358728 [Spodoptera litura]	XP_022829757.1	65.51	861	267	13	1	843	10	858	0	1057
augustus_masked-tulip_contig_89_pilon_pilon-processed-gene-2.1-mRNA-1	XP_022823341.1 piggyBac transposable element-derived protein 3-like [Spodoptera litura]	XP_022823341.1	62.31	329	108	5	1	317	1	325	9e-138	405
maker-tulip_contig_89_pilon_pilon-augustus-gene-3.12-mRNA-1	XP_022830102.1 transmembrane protein 223 [Spodoptera litura]	XP_022830102.1	94.2	224	13	0	1	224	1	224	6e-148	421
maker-tulip_contig_89_pilon_pilon-augustus-gene-3.14-mRNA-1	XP_022830449.1 uncharacterized protein LOC111359220 isoform X2 [Spodoptera litura]	XP_022830449.1	90.8	87	8	0	13	99	157	243	5e-48	165
maker-tulip_contig_89_pilon_pilon-augustus-gene-3.15-mRNA-1	XP_022830170.1 lipase member I-like isoform X1 [Spodoptera litura]	XP_022830170.1	91.09	359	32	0	1	359	1	359	0	700
augustus_masked-tulip_contig_89_pilon_pilon-processed-gene-3.3-mRNA-1	XP_022830444.1 balbiani ring protein 3-like [Spodoptera litura]	XP_022830444.1	87.6	847	105	0	1	847	1	847	0	1344
maker-tulip_contig_89_pilon_pilon-augustus-gene-3.17-mRNA-1	XP_022829849.1 DNA topoisomerase 2 [Spodoptera litura]	XP_022829849.1	91.94	1526	34	4	1	1470	1	1493	0	2669
augustus_masked-tulip_contig_89_pilon_pilon-processed-gene-3.5-mRNA-1	XP_022829749.1 uncharacterized protein LOC111358721 isoform X2 [Spodoptera litura]	XP_022829749.1	98.67	150	2	0	1	150	502	651	6e-101	313
maker-tulip_contig_89_pilon_pilon-augustus-gene-3.28-mRNA-1	XP_022829749.1 uncharacterized protein LOC111358721 isoform X2 [Spodoptera litura]	XP_022829749.1	97.94	97	2	0	1	97	390	486	1e-59	204
augustus_masked-tulip_contig_89_pilon_pilon-processed-gene-3.8-mRNA-1	XP_022829749.1 uncharacterized protein LOC111358721 isoform X2 [Spodoptera litura]	XP_022829749.1	98.38	247	4	0	1	247	1	247	2e-165	483
maker-tulip_contig_89_pilon_pilon-augustus-gene-3.29-mRNA-1	XP_022829948.1 activating transcription factor 7-interacting protein 1 [Spodoptera litura]	XP_022829948.1	87.4	365	43	3	2	366	625	986	0	652
maker-tulip_contig_89_pilon_pilon-augustus-gene-3.30-mRNA-1	XP_022829948.1 activating transcription factor 7-interacting protein 1 [Spodoptera litura]	XP_022829948.1	62.54	622	162	8	1	552	1	621	0	649
maker-tulip_contig_89_pilon_pilon-augustus-gene-3.11-mRNA-1	XP_022830445.1 uncharacterized protein LOC111359217 [Spodoptera litura]	XP_022830445.1	97.94	97	2	0	86	182	183	279	4e-64	208
maker-tulip_contig_89_pilon_pilon-augustus-gene-4.17-mRNA-1	XP_022830302.1 NADH dehydrogenase [ubiquinone] flavoprotein 2, mitochondrial [Spodoptera litura]	XP_022830302.1	82.04	245	9	2	1	210	1	245	4e-140	402
maker-tulip_contig_89_pilon_pilon-augustus-gene-4.20-mRNA-1	XP_022830132.1 calcium-transporting ATPase type 2C member 1 [Spodoptera litura]	XP_022830132.1	79.88	830	41	8	1	707	135	961	0	1276
augustus_masked-tulip_contig_89_pilon_pilon-processed-gene-4.5-mRNA-1	PCG71286.1 hypothetical protein B5V51_2043, partial [Heliothis virescens]	PCG71286.1	96.5	143	4	1	31	173	1	142	1e-87	263
augustus_masked-tulip_contig_89_pilon_pilon-processed-gene-4.0-mRNA-1	PCG80986.1 hypothetical protein B5V51_10544 [Heliothis virescens]	PCG80986.1	95.74	705	24	3	1	704	58	757	0	1167
augustus_masked-tulip_contig_89_pilon_pilon-processed-gene-4.6-mRNA-1	PZC79890.1 hypothetical protein B5X24_HaOG215654 [Helicoverpa armigera]	PZC79890.1	52.18	481	220	4	10	483	1251	1728	5e-161	510
augustus_masked-tulip_contig_89_pilon_pilon-processed-gene-4.7-mRNA-1	XP_011569045.1 PREDICTED: uncharacterized protein LOC105398601 [Plutella xylostella]	XP_011569045.1	63	100	36	1	1	100	13	111	5e-35	137
maker-tulip_contig_89_pilon_pilon-augustus-gene-4.24-mRNA-1	XP_011554761.1 PREDICTED: uncharacterized protein LOC105385988 [Plutella xylostella]	XP_011554761.1	56.49	370	108	3	15	334	587	953	2e-124	406
maker-tulip_contig_89_pilon_pilon-augustus-gene-4.25-mRNA-1	JAV65003.1 hypothetical protein, partial [Photinus pyralis]	JAV65003.1	55.56	279	124	0	91	369	249	527	3e-114	353
maker-tulip_contig_89_pilon_pilon-augustus-gene-4.26-mRNA-1	XP_026746134.1 uncharacterized protein LOC113507482 [Trichoplusia ni]	XP_026746134.1	52.03	271	120	3	35	295	58	328	5e-84	266
maker-tulip_contig_89_pilon_pilon-augustus-gene-4.27-mRNA-1	XP_022830340.1 beta-1,3-glucan-binding protein-like [Spodoptera litura]	XP_022830340.1	78.25	492	52	2	1	437	1	492	0	776
maker-tulip_contig_89_pilon_pilon-augustus-gene-4.28-mRNA-1	XP_022830356.1 beta-1,3-glucan-binding protein-like [Spodoptera litura]	XP_022830356.1	75.66	456	40	3	3	387	45	500	0	691
maker-tulip_contig_89_pilon_pilon-augustus-gene-4.29-mRNA-1	XP_022830389.1 uncharacterized protein LOC111359163 [Spodoptera litura]	XP_022830389.1	70.6	483	131	5	1	479	554	1029	0	711
augustus_masked-tulip_contig_89_pilon_pilon-processed-gene-4.15-mRNA-1	XP_022830389.1 uncharacterized protein LOC111359163 [Spodoptera litura]	XP_022830389.1	93.23	310	21	0	21	330	183	492	0	610
augustus_masked-tulip_contig_43_pilon_pilon-processed-gene-0.116-mRNA-1	XP_022817879.1 uncharacterized protein LOC111350498 [Spodoptera litura]	XP_022817879.1	70.55	292	46	1	1	252	1	292	9e-152	435
augustus_masked-tulip_contig_43_pilon_pilon-processed-gene-0.117-mRNA-1	XP_022817942.1 uncharacterized protein LOC111350556 [Spodoptera litura]	XP_022817942.1	74	150	35	1	4	153	9	154	1e-70	233
augustus_masked-tulip_contig_43_pilon_pilon-processed-gene-0.118-mRNA-1	XP_022817893.1 uncharacterized protein LOC111350507 [Spodoptera litura]	XP_022817893.1	64.44	284	48	3	1	234	1	281	4e-123	362
maker-tulip_contig_43_pilon_pilon-augustus-gene-0.16-mRNA-1	XP_022817471.1 ribosomal RNA processing protein 36 homolog [Spodoptera litura]	XP_022817471.1	85.71	238	4	1	8	215	1	238	7e-137	394
augustus_masked-tulip_contig_43_pilon_pilon-processed-gene-0.120-mRNA-1	XP_022818067.1 uncharacterized protein LOC111350660 [Spodoptera litura]	XP_022818067.1	82.03	217	39	0	1	217	1	217	4e-127	368
maker-tulip_contig_43_pilon_pilon-augustus-gene-0.20-mRNA-1	XP_022818066.1 micronuclear linker histone polyprotein-like [Spodoptera litura]	XP_022818066.1	41.3	707	313	21	74	739	35	680	5e-111	363
maker-tulip_contig_43_pilon_pilon-augustus-gene-0.22-mRNA-1	PCG66676.1 hypothetical protein B5V51_7368 [Heliothis virescens]	PCG66676.1	98.19	332	6	0	1	332	1	332	0	682
augustus_masked-tulip_contig_43_pilon_pilon-processed-gene-0.123-mRNA-1	XP_013199835.1 PREDICTED: uncharacterized protein LOC106142574, partial [Amyelois transitella]	XP_013199835.1	68.6	121	38	0	1	121	276	396	2e-47	167
maker-tulip_contig_43_pilon_pilon-augustus-gene-0.28-mRNA-1	XP_022817893.1 uncharacterized protein LOC111350507 [Spodoptera litura]	XP_022817893.1	77.22	180	41	0	1	180	105	284	7e-100	300
augustus_masked-tulip_contig_43_pilon_pilon-processed-gene-0.126-mRNA-1	XP_022817959.1 uncharacterized protein LOC111350564 [Spodoptera litura]	XP_022817959.1	90.66	182	17	0	1	182	23	204	1e-119	347
maker-tulip_contig_43_pilon_pilon-augustus-gene-0.30-mRNA-1	XP_022817470.1 uncharacterized protein LOC111350240 [Spodoptera litura]	XP_022817470.1	91.14	271	24	0	10	280	25	295	0	528
maker-tulip_contig_43_pilon_pilon-augustus-gene-0.31-mRNA-1	XP_022818064.1 bifunctional glutamate/proline--tRNA ligase [Spodoptera litura]	XP_022818064.1	94.39	1461	44	3	1	1424	239	1698	0	2833
maker-tulip_contig_43_pilon_pilon-augustus-gene-0.111-mRNA-1	XP_012255018.1 ras-related protein Rab-1A [Athalia rosae]	XP_012255018.1	68.97	203	19	1	1	159	4	206	5e-93	278
maker-tulip_contig_43_pilon_pilon-augustus-gene-0.113-mRNA-1	XP_022817540.1 uncharacterized protein LOC111350281 [Spodoptera litura]	XP_022817540.1	85	1647	195	13	1	1614	1	1628	0	2730
maker-tulip_contig_43_pilon_pilon-augustus-gene-0.115-mRNA-1	XP_022817801.1 dihydrolipoyllysine-residue succinyltransferase component of 2-oxoglutarate dehydrogenase complex, mitochondrial-like isoform X1 [Spodoptera litura]	XP_022817801.1	80.99	405	58	2	1	386	54	458	0	597
augustus_masked-tulip_contig_43_pilon_pilon-processed-gene-1.3-mRNA-1	XP_022817784.1 homeobox protein prospero isoform X1 [Spodoptera litura]	XP_022817784.1	99.4	836	4	1	1	835	1	836	0	1683
maker-tulip_contig_43_pilon_pilon-augustus-gene-1.8-mRNA-1	PZC72458.1 hypothetical protein B5X24_HaOG211129 [Helicoverpa armigera]	PZC72458.1	97.32	112	3	0	3	114	42	153	4e-74	226
augustus_masked-tulip_contig_43_pilon_pilon-processed-gene-1.5-mRNA-1	XP_011547763.1 PREDICTED: uncharacterized protein LOC105379985 [Plutella xylostella]	XP_011547763.1	51.32	302	133	7	1	295	1	295	4e-83	262
augustus_masked-tulip_contig_43_pilon_pilon-processed-gene-1.7-mRNA-1	XP_022818099.1 protein UXT [Spodoptera litura]	XP_022818099.1	82.53	166	28	1	1	165	1	166	1e-95	284
maker-tulip_contig_43_pilon_pilon-augustus-gene-2.0-mRNA-1	PZC76700.1 hypothetical protein B5X24_HaOG204331 [Helicoverpa armigera]	PZC76700.1	54.39	228	94	4	51	272	308	531	7e-82	265
maker-tulip_contig_43_pilon_pilon-augustus-gene-2.1-mRNA-1	XP_022818020.1 NAD-dependent protein deacetylase sirtuin-2-like [Spodoptera litura]	XP_022818020.1	97.71	175	4	0	1	175	1	175	2e-117	353
maker-tulip_contig_43_pilon_pilon-augustus-gene-2.6-mRNA-1	XP_022817900.1 kelch-like protein 13 [Spodoptera litura]	XP_022817900.1	87.08	387	50	0	1	387	1	387	0	684
maker-tulip_contig_43_pilon_pilon-augustus-gene-2.7-mRNA-1	XP_022817902.1 uncharacterized protein LOC111350515 [Spodoptera litura]	XP_022817902.1	59.16	311	120	2	73	377	12	321	3e-114	346
maker-tulip_contig_43_pilon_pilon-augustus-gene-2.8-mRNA-1	XP_022817900.1 kelch-like protein 13 [Spodoptera litura]	XP_022817900.1	80.61	196	28	1	10	195	386	581	2e-109	335
maker-tulip_contig_43_pilon_pilon-augustus-gene-2.12-mRNA-1	XP_022818018.1 uncharacterized protein LOC111350618 [Spodoptera litura]	XP_022818018.1	89.07	503	50	4	1	500	1	501	0	892
augustus_masked-tulip_contig_43_pilon_pilon-processed-gene-2.28-mRNA-1	XP_022817547.1 uncharacterized protein LOC111350288 [Spodoptera litura]	XP_022817547.1	93.33	255	17	0	1	255	1	255	1e-176	496
augustus_masked-tulip_contig_43_pilon_pilon-processed-gene-2.30-mRNA-1	XP_022817435.1 protein doublesex [Spodoptera litura]	XP_022817435.1	90.26	154	15	0	1	154	1	154	3e-80	253
maker-tulip_contig_43_pilon_pilon-augustus-gene-2.15-mRNA-1	XP_022817523.1 DNA repair protein RAD51 homolog 1 [Spodoptera litura]	XP_022817523.1	96.15	338	0	1	1	325	1	338	0	662
maker-tulip_contig_43_pilon_pilon-augustus-gene-2.16-mRNA-1	XP_022818141.1 unc-112-related protein [Spodoptera litura]	XP_022818141.1	92.91	522	4	1	13	501	50	571	0	987
maker-tulip_contig_43_pilon_pilon-augustus-gene-2.14-mRNA-1	KPJ18036.1 Protein doublesex [Papilio machaon]	KPJ18036.1	70.73	82	13	1	1	82	12	82	1e-35	125
maker-tulip_contig_43_pilon_pilon-augustus-gene-3.7-mRNA-1	ASO76503.1 Prohormone neuropeptide and protease processing, partial [Spodoptera littoralis]	ASO76503.1	88.96	163	0	1	1	145	95	257	2e-93	290
maker-tulip_contig_43_pilon_pilon-augustus-gene-3.9-mRNA-1	XP_022817438.1 uncharacterized protein LOC111350221 [Spodoptera litura]	XP_022817438.1	82.64	991	153	9	1	980	1	983	0	1426
maker-tulip_contig_43_pilon_pilon-augustus-gene-3.11-mRNA-1	PZC79421.1 hypothetical protein B5X24_HaOG216416 [Helicoverpa armigera]	PZC79421.1	54.55	528	192	11	255	776	399	884	0	553
augustus_masked-tulip_contig_43_pilon_pilon-processed-gene-3.4-mRNA-1	PZC76691.1 hypothetical protein B5X24_HaOG204322 [Helicoverpa armigera]	PZC76691.1	74.34	1142	238	14	11	1114	39	1163	0	1663
maker-tulip_contig_43_pilon_pilon-augustus-gene-3.13-mRNA-1	XP_022817437.1 chromosome-associated kinesin KIF4 isoform X2 [Spodoptera litura]	XP_022817437.1	76.05	1165	98	13	1	1008	1	1141	0	1606
augustus_masked-tulip_contig_43_pilon_pilon-processed-gene-3.6-mRNA-1	XP_022817886.1 silk gland factor 1 [Spodoptera litura]	XP_022817886.1	100	353	0	0	1	353	1	353	0	734
maker-tulip_contig_43_pilon_pilon-augustus-gene-3.15-mRNA-1	XP_021192045.1 uncharacterized protein LOC110377455 isoform X3 [Helicoverpa armigera]	XP_021192045.1	84.51	71	3	1	1	71	54	116	2e-30	112
maker-tulip_contig_43_pilon_pilon-augustus-gene-4.8-mRNA-1	XP_022817533.1 uncharacterized protein LOC111350275 [Spodoptera litura]	XP_022817533.1	72.16	255	61	5	1	249	1	251	4e-124	363
augustus_masked-tulip_contig_43_pilon_pilon-processed-gene-4.1-mRNA-1	XP_022817618.1 uncharacterized protein LOC111350327 isoform X1 [Spodoptera litura]	XP_022817618.1	95.83	264	11	0	1	264	1	264	0	539
maker-tulip_contig_43_pilon_pilon-augustus-gene-4.11-mRNA-1	XP_022817531.1 hypoxia-inducible factor 1-alpha-like isoform X5 [Spodoptera litura]	XP_022817531.1	92.84	517	33	2	5	517	340	856	0	900
augustus_masked-tulip_contig_43_pilon_pilon-processed-gene-4.4-mRNA-1	XP_022817529.1 hypoxia-inducible factor 1-alpha-like isoform X3 [Spodoptera litura]	XP_022817529.1	95.8	143	6	0	1	143	1	143	2e-86	285
augustus_masked-tulip_contig_43_pilon_pilon-processed-gene-4.6-mRNA-1	PCG80976.1 hypothetical protein B5V51_10536 [Heliothis virescens]	PCG80976.1	60.33	421	167	0	11	431	138	558	0	542
augustus_masked-tulip_contig_43_pilon_pilon-processed-gene-4.7-mRNA-1	XP_022824616.1 uncharacterized protein LOC111355118 [Spodoptera litura]	XP_022824616.1	73.33	255	62	3	1	252	1	252	8e-132	383
maker-tulip_contig_43_pilon_pilon-augustus-gene-5.7-mRNA-1	XP_022817742.1 hemicentin-1-like [Spodoptera litura]	XP_022817742.1	77.88	321	31	3	1	287	461	775	8e-168	494
maker-tulip_contig_43_pilon_pilon-augustus-gene-5.8-mRNA-1	PCG74919.1 hypothetical protein B5V51_12563 [Heliothis virescens]	PCG74919.1	93.61	360	20	1	1	360	1	357	0	711
maker-tulip_contig_43_pilon_pilon-augustus-gene-5.12-mRNA-1	XP_022817851.1 protein Fer3-like isoform X2 [Spodoptera litura]	XP_022817851.1	65.57	183	22	4	49	230	1	143	3e-66	211
augustus_masked-tulip_contig_43_pilon_pilon-processed-gene-5.4-mRNA-1	XP_023949908.1 piggyBac transposable element-derived protein 4-like [Bicyclus anynana]	XP_023949908.1	32.26	93	57	3	2	88	546	638	6e-07	53.9
augustus_masked-tulip_contig_43_pilon_pilon-processed-gene-5.5-mRNA-1	XP_026741630.1 uncharacterized protein LOC113503746 [Trichoplusia ni]	XP_026741630.1	53.99	163	66	4	1	162	1	155	5e-33	127
maker-tulip_contig_43_pilon_pilon-augustus-gene-5.14-mRNA-1	XP_026734846.1 CXXC-type zinc finger protein 1-like isoform X2 [Trichoplusia ni]	XP_026734846.1	77.42	248	16	2	1	209	1	247	4e-119	362
augustus_masked-tulip_contig_43_pilon_pilon-processed-gene-6.102-mRNA-1	XP_022834499.1 BTB/POZ domain-containing protein 6 isoform X2 [Spodoptera litura]	XP_022834499.1	90.28	535	4	1	1	487	1	535	0	991
maker-tulip_contig_43_pilon_pilon-augustus-gene-6.4-mRNA-1	XP_022834495.1 transcription factor kayak isoform X3 [Spodoptera litura]	XP_022834495.1	99.21	378	3	0	1	378	1	378	0	770
augustus_masked-tulip_contig_43_pilon_pilon-processed-gene-6.107-mRNA-1	XP_022817494.1 alpha-mannosidase 2 isoform X2 [Spodoptera litura]	XP_022817494.1	96.26	348	13	0	1	348	1	348	0	712
maker-tulip_contig_43_pilon_pilon-augustus-gene-6.18-mRNA-1	XP_022817399.1 uncharacterized protein LOC111350198 [Spodoptera litura]	XP_022817399.1	98.23	395	7	0	1	395	1	395	0	791
maker-tulip_contig_43_pilon_pilon-augustus-gene-6.20-mRNA-1	XP_022817598.1 uncharacterized protein LOC111350317 [Spodoptera litura]	XP_022817598.1	93.14	379	24	2	1	378	1	378	0	692
augustus_masked-tulip_contig_43_pilon_pilon-processed-gene-6.111-mRNA-1	XP_022818019.1 putative transferase CAF17 homolog, mitochondrial [Spodoptera litura]	XP_022818019.1	87.32	347	43	1	1	346	1	347	0	622
augustus_masked-tulip_contig_43_pilon_pilon-processed-gene-6.113-mRNA-1	XP_022817688.1 dol-P-Man:Man(7)GlcNAc(2)-PP-Dol alpha-1,6-mannosyltransferase [Spodoptera litura]	XP_022817688.1	83.88	769	74	4	1	721	1	767	0	1257
augustus_masked-tulip_contig_43_pilon_pilon-processed-gene-6.114-mRNA-1	XP_022817374.1 anaphase-promoting complex subunit 2 [Spodoptera litura]	XP_022817374.1	98.84	776	9	0	1	776	1	776	0	1593
maker-tulip_contig_43_pilon_pilon-augustus-gene-6.25-mRNA-1	XP_022817375.1 endocuticle structural glycoprotein ABD-5-like [Spodoptera litura]	XP_022817375.1	93.58	109	7	0	1	109	1	109	2e-59	187
maker-tulip_contig_43_pilon_pilon-augustus-gene-6.27-mRNA-1	XP_022818111.1 uncharacterized protein LOC111350694 [Spodoptera litura]	XP_022818111.1	84.77	197	17	1	1	184	1	197	9e-118	342
maker-tulip_contig_43_pilon_pilon-augustus-gene-6.29-mRNA-1	XP_022817594.1 ankycorbin [Spodoptera litura]	XP_022817594.1	91.32	1520	80	4	62	1531	1	1518	0	2606
maker-tulip_contig_43_pilon_pilon-augustus-gene-6.31-mRNA-1	XP_022834505.1 protein pellino isoform X2 [Spodoptera litura]	XP_022834505.1	84.8	250	2	1	8	221	183	432	2e-150	435
augustus_masked-tulip_contig_43_pilon_pilon-processed-gene-6.119-mRNA-1	XP_022834497.1 transcription factor IIIB 90 kDa subunit [Spodoptera litura]	XP_022834497.1	86.18	427	22	5	1	391	214	639	0	680
maker-tulip_contig_43_pilon_pilon-augustus-gene-6.35-mRNA-1	XP_026734876.1 transcription factor IIIB 90 kDa subunit-like [Trichoplusia ni]	XP_026734876.1	97.99	149	3	0	1	149	1	149	1e-102	302
maker-tulip_contig_43_pilon_pilon-augustus-gene-6.36-mRNA-1	XP_022834506.1 sodium channel protein Nach-like [Spodoptera litura]	XP_022834506.1	72.88	59	16	0	1	59	247	305	6e-20	90.5
maker-tulip_contig_43_pilon_pilon-augustus-gene-6.38-mRNA-1	XP_022817794.1 synaptotagmin-16 isoform X1 [Spodoptera litura]	XP_022817794.1	81.82	330	8	1	1	278	1	330	0	533
maker-tulip_contig_43_pilon_pilon-augustus-gene-6.43-mRNA-1	AFU25694.1 Na+,K+ ATPase alpha-subunit 1 [Trichordestra legitima]	AFU25694.1	99.81	1036	2	0	1	1036	1	1036	0	2141
maker-tulip_contig_43_pilon_pilon-augustus-gene-6.46-mRNA-1	XP_022818095.1 zinc finger protein 883-like isoform X2 [Spodoptera litura]	XP_022818095.1	59.73	447	112	8	3	387	5	445	3e-171	496
maker-tulip_contig_43_pilon_pilon-augustus-gene-6.48-mRNA-1	ARD71202.1 acetyltransferase [Spodoptera exigua]	ARD71202.1	98.82	169	2	0	6	174	283	451	2e-111	342
maker-tulip_contig_43_pilon_pilon-augustus-gene-6.49-mRNA-1	ARD71202.1 acetyltransferase [Spodoptera exigua]	ARD71202.1	93.69	301	0	1	1	301	1	282	0	583
maker-tulip_contig_43_pilon_pilon-augustus-gene-6.50-mRNA-1	XP_021196107.1 RNA helicase Mov10l1-like [Helicoverpa armigera]	XP_021196107.1	49.6	875	273	10	18	725	2	875	0	834
maker-tulip_contig_43_pilon_pilon-augustus-gene-6.53-mRNA-1	XP_022817400.1 uncharacterized protein LOC111350199 [Spodoptera litura]	XP_022817400.1	78.09	178	13	2	1	168	1	162	2e-95	283
maker-tulip_contig_43_pilon_pilon-augustus-gene-6.54-mRNA-1	XP_022817378.1 ubiquitin carboxyl-terminal hydrolase 34 isoform X3 [Spodoptera litura]	XP_022817378.1	82.53	1471	87	12	1	1303	1	1469	0	2203
maker-tulip_contig_43_pilon_pilon-augustus-gene-6.64-mRNA-1	XP_022817488.1 protein UBASH3A homolog isoform X2 [Spodoptera litura]	XP_022817488.1	89.79	333	33	1	2	333	345	677	0	649
maker-tulip_contig_43_pilon_pilon-augustus-gene-6.66-mRNA-1	XP_022817487.1 protein UBASH3A homolog isoform X1 [Spodoptera litura]	XP_022817487.1	92	350	6	1	1	350	1	328	0	660
maker-tulip_contig_43_pilon_pilon-augustus-gene-6.79-mRNA-1	XP_022817372.1 probable Rho GTPase-activating protein CG5521 isoform X2 [Spodoptera litura]	XP_022817372.1	93.33	120	8	0	1	120	1740	1859	3e-54	192
augustus_masked-tulip_contig_43_pilon_pilon-processed-gene-6.135-mRNA-1	XP_022817373.1 probable Rho GTPase-activating protein CG5521 isoform X3 [Spodoptera litura]	XP_022817373.1	98.25	458	8	0	1	458	1041	1498	0	934
augustus_masked-tulip_contig_43_pilon_pilon-processed-gene-6.137-mRNA-1	XP_022817372.1 probable Rho GTPase-activating protein CG5521 isoform X2 [Spodoptera litura]	XP_022817372.1	82.11	833	15	4	1	699	1	833	0	1340
augustus_masked-tulip_contig_43_pilon_pilon-processed-gene-6.138-mRNA-1	PCG64608.1 hypothetical protein B5V51_10400 [Heliothis virescens]	PCG64608.1	77.14	245	12	2	1	201	869	1113	1e-122	382
augustus_masked-tulip_contig_180_pilon_pilon-processed-gene-0.11-mRNA-1	XP_026754667.1 deleted in malignant brain tumors 1 protein-like, partial [Galleria mellonella]	XP_026754667.1	77.5	80	18	0	1	80	34	113	5e-39	134
augustus_masked-tulip_contig_180_pilon_pilon-processed-gene-0.12-mRNA-1	XP_026744581.1 uncharacterized protein LOC113505908 [Trichoplusia ni]	XP_026744581.1	78.04	296	60	3	1	292	1	295	1e-154	453
augustus_masked-tulip_contig_180_pilon_pilon-processed-gene-0.14-mRNA-1	XP_026745641.1 zinc finger BED domain-containing protein 1-like [Trichoplusia ni]	XP_026745641.1	55.93	177	75	1	1	177	358	531	5e-60	207
augustus_masked-tulip_contig_180_pilon_pilon-processed-gene-0.15-mRNA-1	XP_021199278.1 uncharacterized protein LOC110382894 [Helicoverpa armigera]	XP_021199278.1	92.27	194	15	0	2	195	46	239	8e-126	371
augustus_masked-tulip_contig_180_pilon_pilon-processed-gene-0.16-mRNA-1	XP_021199278.1 uncharacterized protein LOC110382894 [Helicoverpa armigera]	XP_021199278.1	93.18	44	3	0	1	44	379	422	2e-19	87.4
augustus_masked-tulip_contig_180_pilon_pilon-processed-gene-0.18-mRNA-1	PZC80269.1 hypothetical protein B5X24_HaOG214968 [Helicoverpa armigera]	PZC80269.1	84.48	116	18	0	1	116	1	116	1e-68	211
augustus_masked-tulip_contig_180_pilon_pilon-processed-gene-0.19-mRNA-1	RVE42630.1 hypothetical protein evm_012716 [Chilo suppressalis]	RVE42630.1	57.24	145	20	3	1	142	216	321	2e-42	151
maker-tulip_contig_180_pilon_pilon-augustus-gene-0.0-mRNA-1	XP_022834998.1 uncharacterized protein LOC111362538 [Spodoptera litura]	XP_022834998.1	69.12	68	21	0	51	118	1	68	4e-25	102
maker-tulip_contig_180_pilon_pilon-augustus-gene-0.1-mRNA-1	XP_021186534.1 uncharacterized protein LOC110373556 [Helicoverpa armigera]	XP_021186534.1	71.67	233	44	3	1	223	1	221	6e-114	340
maker-tulip_contig_180_pilon_pilon-augustus-gene-0.2-mRNA-1	PZC78267.1 hypothetical protein B5X24_HaOG202339 [Helicoverpa armigera]	PZC78267.1	48.54	103	49	2	122	220	217	319	4e-18	91.3
augustus_masked-tulip_contig_180_pilon_pilon-processed-gene-0.27-mRNA-1	XP_026746087.1 uncharacterized protein LOC113507429 [Trichoplusia ni]	XP_026746087.1	72.01	293	80	1	1	293	1	291	8e-150	432
augustus_masked-tulip_contig_180_pilon_pilon-processed-gene-0.28-mRNA-1	PZC86310.1 hypothetical protein B5X24_HaOG211471 [Helicoverpa armigera]	PZC86310.1	44.58	166	91	1	91	255	298	463	8e-33	137
augustus_masked-tulip_contig_180_pilon_pilon-processed-gene-0.29-mRNA-1	JAT85309.1 hypothetical protein g.18012, partial [Pectinophora gossypiella]	JAT85309.1	98.45	129	2	0	71	199	1	129	2e-87	264
maker-tulip_contig_180_pilon_pilon-augustus-gene-0.4-mRNA-1	XP_013195813.1 PREDICTED: transcription factor Adf-1-like [Amyelois transitella]	XP_013195813.1	46.23	199	87	3	1	180	1	198	4e-54	183
augustus_masked-tulip_contig_180_pilon_pilon-processed-gene-0.31-mRNA-1	JAA82923.1 Uncharacterized protein, partial [Pararge aegeria]	JAA82923.1	80	40	5	1	2	41	69	105	2e-09	57.4
augustus_masked-tulip_contig_180_pilon_pilon-processed-gene-0.32-mRNA-1	XP_012550153.1 uncharacterized protein LOC105842338 [Bombyx mori]	XP_012550153.1	81.08	111	20	1	1	110	97	207	3e-45	157
augustus_masked-tulip_contig_180_pilon_pilon-processed-gene-0.33-mRNA-1	XP_023950479.1 uncharacterized protein LOC112054809 [Bicyclus anynana]	XP_023950479.1	94.71	227	6	1	1	221	96	322	3e-153	438
maker-tulip_contig_180_pilon_pilon-augustus-gene-0.6-mRNA-1	KPJ14196.1 hypothetical protein RR48_06946 [Papilio machaon]	KPJ14196.1	42.19	256	93	8	60	282	103	336	1e-40	152
maker-tulip_contig_180_pilon_pilon-augustus-gene-0.7-mRNA-1	JAT79518.1 hypothetical protein g.12896 [Pectinophora gossypiella]	JAT79518.1	83.56	225	33	1	151	371	358	582	1e-125	384
augustus_masked-tulip_contig_180_pilon_pilon-processed-gene-0.37-mRNA-1	XP_026746837.1 uncharacterized protein LOC113508076 [Trichoplusia ni]	XP_026746837.1	67.37	429	134	4	205	628	15	442	0	600
augustus_masked-tulip_contig_180_pilon_pilon-processed-gene-0.39-mRNA-1	XP_026744274.1 uncharacterized protein LOC113505673 isoform X1 [Trichoplusia ni]	XP_026744274.1	97.15	246	7	0	1	246	74	319	8e-174	491
augustus_masked-tulip_contig_180_pilon_pilon-processed-gene-0.41-mRNA-1	PZC79890.1 hypothetical protein B5X24_HaOG215654 [Helicoverpa armigera]	PZC79890.1	61.42	197	73	1	10	206	1251	1444	9e-71	244
augustus_masked-tulip_contig_180_pilon_pilon-processed-gene-0.42-mRNA-1	PCG64564.1 hypothetical protein B5V51_10475, partial [Heliothis virescens]	PCG64564.1	42.39	92	43	3	1	82	137	228	2e-14	73.9
augustus_masked-tulip_contig_180_pilon_pilon-processed-gene-0.44-mRNA-1	RVE42083.1 hypothetical protein evm_013269 [Chilo suppressalis]	RVE42083.1	92.42	264	20	0	5	268	152	415	2e-173	495
augustus_masked-tulip_contig_180_pilon_pilon-processed-gene-0.45-mRNA-1	RVE42083.1 hypothetical protein evm_013269 [Chilo suppressalis]	RVE42083.1	88.35	103	12	0	1	103	52	154	2e-56	189
augustus_masked-tulip_contig_180_pilon_pilon-processed-gene-0.46-mRNA-1	XP_022121799.1 piggyBac transposable element-derived protein 2-like [Pieris rapae]	XP_022121799.1	59.49	195	75	3	39	229	376	570	3e-73	243
maker-tulip_contig_180_pilon_pilon-augustus-gene-0.10-mRNA-1	BAM18265.1 unknown unsecreted protein [Papilio xuthus]	BAM18265.1	93.95	215	13	0	1	215	129	343	4e-146	434
augustus_masked-tulip_contig_180_pilon_pilon-processed-gene-0.50-mRNA-1	KPJ19882.1 hypothetical protein RR48_02310 [Papilio machaon]	KPJ19882.1	100	257	0	0	1	257	83	339	0	541
augustus_masked-tulip_contig_180_pilon_pilon-processed-gene-0.52-mRNA-1	XP_026744272.1 protein ANTAGONIST OF LIKE HETEROCHROMATIN PROTEIN 1-like [Trichoplusia ni]	XP_026744272.1	100	293	0	0	6	298	97	389	0	609
augustus_masked-tulip_contig_180_pilon_pilon-processed-gene-0.53-mRNA-1	XP_026735793.1 uncharacterized protein LOC113499487 [Trichoplusia ni]	XP_026735793.1	97.88	189	4	0	1	189	1	189	2e-129	381
augustus_masked-tulip_contig_180_pilon_pilon-processed-gene-0.54-mRNA-1	XP_026322777.1 uncharacterized protein LOC113232315 isoform X1 [Hyposmocoma kahamanoa]	XP_026322777.1	51.54	260	116	4	29	284	6	259	1e-81	259
maker-tulip_contig_42_pilon_pilon-augustus-gene-0.0-mRNA-1	ASO98023.1 cytochrome p450 CYP337B5 [Spodoptera exigua]	ASO98023.1	98.42	443	5	1	1	441	50	492	0	903
maker-tulip_contig_42_pilon_pilon-augustus-gene-0.2-mRNA-1	ASO98019.1 cytochrome p450 CYP321B1 [Spodoptera exigua]	ASO98019.1	98.92	370	4	0	1	370	1	370	0	761
augustus_masked-tulip_contig_42_pilon_pilon-processed-gene-0.8-mRNA-1	XP_022829000.1 uncharacterized protein LOC111358225 [Spodoptera litura]	XP_022829000.1	69.49	236	27	2	1	191	1	236	6e-110	324
maker-tulip_contig_42_pilon_pilon-augustus-gene-0.5-mRNA-1	XP_022828110.1 uncharacterized protein LOC111357583 [Spodoptera litura]	XP_022828110.1	81.76	455	76	4	1	452	6	456	0	705
augustus_masked-tulip_contig_42_pilon_pilon-processed-gene-0.10-mRNA-1	XP_026746887.1 uncharacterized protein LOC113508113 [Trichoplusia ni]	XP_026746887.1	69.84	63	19	0	1	63	125	187	3e-21	91.7
augustus_masked-tulip_contig_42_pilon_pilon-processed-gene-0.11-mRNA-1	KOB68250.1 putative blastopia polyprotein [Operophtera brumata]	KOB68250.1	73.75	80	21	0	20	99	33	112	5e-37	132
augustus_masked-tulip_contig_42_pilon_pilon-processed-gene-0.12-mRNA-1	ASO98020.1 cytochrome p450 CYP321B4 [Spodoptera exigua]	ASO98020.1	93.82	356	20	1	14	369	14	367	0	672
augustus_masked-tulip_contig_42_pilon_pilon-processed-gene-0.13-mRNA-1	ASO98020.1 cytochrome p450 CYP321B4 [Spodoptera exigua]	ASO98020.1	98.59	496	7	0	1	496	1	496	0	1016
augustus_masked-tulip_contig_42_pilon_pilon-processed-gene-1.56-mRNA-1	XP_022824833.1 pre-rRNA-processing protein TSR2 homolog [Spodoptera litura]	XP_022824833.1	96.76	185	6	0	1	185	1	185	2e-110	323
maker-tulip_contig_42_pilon_pilon-augustus-gene-1.2-mRNA-1	XP_022828302.1 alpha-1,2-mannosyltransferase ALG9 [Spodoptera litura]	XP_022828302.1	80.85	282	8	1	64	299	310	591	3e-135	405
maker-tulip_contig_42_pilon_pilon-augustus-gene-1.4-mRNA-1	XP_022822299.1 tubulin beta chain-like [Spodoptera litura]	XP_022822299.1	96.21	448	17	0	1	448	1	448	0	912
augustus_masked-tulip_contig_42_pilon_pilon-processed-gene-1.61-mRNA-1	XP_022819597.1 diacylglycerol kinase eta isoform X2 [Spodoptera litura]	XP_022819597.1	81.82	132	23	1	1	132	1	131	2e-61	214
maker-tulip_contig_42_pilon_pilon-augustus-gene-1.7-mRNA-1	XP_022819588.1 diacylglycerol kinase eta isoform X1 [Spodoptera litura]	XP_022819588.1	94.67	1407	23	2	5	1367	124	1522	0	2714
augustus_masked-tulip_contig_42_pilon_pilon-processed-gene-1.63-mRNA-1	XP_021190777.1 DCN1-like protein 1 [Helicoverpa armigera]	XP_021190777.1	91.7	265	4	2	1	247	1	265	5e-172	485
maker-tulip_contig_42_pilon_pilon-augustus-gene-1.11-mRNA-1	XP_022824597.1 NADH dehydrogenase [ubiquinone] 1 alpha subcomplex subunit 2 [Spodoptera litura]	XP_022824597.1	91.01	89	8	0	1	89	1	89	5e-56	177
augustus_masked-tulip_contig_42_pilon_pilon-processed-gene-1.66-mRNA-1	XP_022828158.1 glypican-6 [Spodoptera litura]	XP_022828158.1	86.27	670	34	2	22	633	125	794	0	1099
augustus_masked-tulip_contig_42_pilon_pilon-processed-gene-1.69-mRNA-1	XP_022825045.1 general transcription factor IIF subunit 1 [Spodoptera litura]	XP_022825045.1	81.65	316	16	1	1	274	1	316	6e-147	432
maker-tulip_contig_42_pilon_pilon-augustus-gene-1.23-mRNA-1	XP_022825045.1 general transcription factor IIF subunit 1 [Spodoptera litura]	XP_022825045.1	97.37	152	4	0	6	157	367	518	8e-97	298
maker-tulip_contig_42_pilon_pilon-augustus-gene-1.32-mRNA-1	XP_022827191.1 E3 ubiquitin-protein ligase RNF13, partial [Spodoptera litura]	XP_022827191.1	97.5	120	3	0	1	120	32	151	5e-79	247
maker-tulip_contig_42_pilon_pilon-augustus-gene-1.33-mRNA-1	XP_022821716.1 DNA topoisomerase 2-binding protein 1 [Spodoptera litura]	XP_022821716.1	94.69	207	11	0	1	207	1	207	3e-128	421
maker-tulip_contig_42_pilon_pilon-augustus-gene-1.37-mRNA-1	XP_022821790.1 tubulin beta chain [Spodoptera litura]	XP_022821790.1	99.32	443	3	0	1	443	1	443	0	925
maker-tulip_contig_42_pilon_pilon-augustus-gene-1.38-mRNA-1	PCG78469.1 hypothetical protein B5V51_4031 [Heliothis virescens]	PCG78469.1	99.55	446	2	0	1	446	1	446	0	933
maker-tulip_contig_42_pilon_pilon-augustus-gene-1.45-mRNA-1	AYA28074.1 cytochrome P450 SE-CYP9A21v2, partial [Spodoptera exigua]	AYA28074.1	91.76	340	0	1	1	340	1	312	0	622
augustus_masked-tulip_contig_42_pilon_pilon-processed-gene-1.75-mRNA-1	XP_022819639.1 probable glutamate--tRNA ligase, mitochondrial [Spodoptera litura]	XP_022819639.1	90.46	241	23	0	1	241	1	241	2e-162	476
augustus_masked-tulip_contig_42_pilon_pilon-processed-gene-1.76-mRNA-1	XP_022827035.1 probable pseudouridine-5'-phosphatase [Spodoptera litura]	XP_022827035.1	91.94	248	6	1	1	234	1	248	2e-163	462
augustus_masked-tulip_contig_42_pilon_pilon-processed-gene-1.77-mRNA-1	XP_022828667.1 kelch domain-containing protein 4-like [Spodoptera litura]	XP_022828667.1	71.38	283	29	2	1	231	1	283	9e-130	388
maker-tulip_contig_42_pilon_pilon-augustus-gene-1.54-mRNA-1	XP_022827293.1 solute carrier family 22 member 3-like isoform X1 [Spodoptera litura]	XP_022827293.1	95.13	534	26	0	1	534	48	581	0	991
maker-tulip_contig_298_pilon_pilon-augustus-gene-0.25-mRNA-1	XP_013197835.1 PREDICTED: uncharacterized protein LOC106140749 [Amyelois transitella]	XP_013197835.1	97.08	308	5	2	1	304	1	308	0	610
maker-tulip_contig_298_pilon_pilon-augustus-gene-0.27-mRNA-1	XP_013199594.1 PREDICTED: uncharacterized protein LOC106142391 [Amyelois transitella]	XP_013199594.1	62.5	304	107	2	2	298	94	397	2e-134	397
augustus_masked-tulip_contig_298_pilon_pilon-processed-gene-0.2-mRNA-1	XP_026736450.1 putative nuclease HARBI1 [Trichoplusia ni]	XP_026736450.1	54.17	168	70	3	11	174	69	233	2e-54	181
maker-tulip_contig_298_pilon_pilon-augustus-gene-0.28-mRNA-1	JAA78625.1 PiggyBac transposable element-derived protein 4 [Pararge aegeria]	JAA78625.1	43.33	390	173	8	1	354	1	378	2e-94	304
augustus_masked-tulip_contig_298_pilon_pilon-processed-gene-0.4-mRNA-1	RVE54882.1 hypothetical protein evm_000249 [Chilo suppressalis]	RVE54882.1	64.04	114	39	1	102	215	37	148	3e-39	149
augustus_masked-tulip_contig_298_pilon_pilon-processed-gene-0.5-mRNA-1	RVE54882.1 hypothetical protein evm_000249 [Chilo suppressalis]	RVE54882.1	74.75	301	76	0	1	301	145	445	6e-172	494
augustus_masked-tulip_contig_298_pilon_pilon-processed-gene-0.6-mRNA-1	PZC83421.1 hypothetical protein B5X24_HaOG207804 [Helicoverpa armigera]	PZC83421.1	48.97	145	60	3	34	166	236	378	3e-30	122
maker-tulip_contig_298_pilon_pilon-augustus-gene-0.29-mRNA-1	XP_026326750.1 uncharacterized protein LOC113235304 [Hyposmocoma kahamanoa]	XP_026326750.1	75.81	215	52	0	41	255	1	215	1e-122	358
augustus_masked-tulip_contig_298_pilon_pilon-processed-gene-0.8-mRNA-1	RVE50430.1 hypothetical protein evm_004967 [Chilo suppressalis]	RVE50430.1	49.73	185	87	5	1	183	111	291	2e-50	177
augustus_masked-tulip_contig_298_pilon_pilon-processed-gene-0.13-mRNA-1	XP_011554674.1 PREDICTED: uncharacterized protein LOC105385918 [Plutella xylostella]	XP_011554674.1	72.5	120	10	2	109	205	1	120	1e-49	169
augustus_masked-tulip_contig_298_pilon_pilon-processed-gene-0.14-mRNA-1	PZC85021.1 hypothetical protein B5X24_HaOG203342 [Helicoverpa armigera]	PZC85021.1	73.08	234	59	3	1	231	354	586	1e-91	309
augustus_masked-tulip_contig_298_pilon_pilon-processed-gene-0.17-mRNA-1	XP_026331383.1 uncharacterized protein LOC113238762 [Hyposmocoma kahamanoa]	XP_026331383.1	68.14	521	117	2	1	521	1	472	0	735
augustus_masked-tulip_contig_298_pilon_pilon-processed-gene-0.18-mRNA-1	KOB73848.1 Transposon Ty3-I Gag-Pol polyprotein [Operophtera brumata]	KOB73848.1	55.68	273	102	7	1	263	40	303	4e-92	295
augustus_masked-tulip_contig_298_pilon_pilon-processed-gene-0.19-mRNA-1	XP_026743393.1 putative nuclease HARBI1 isoform X2 [Trichoplusia ni]	XP_026743393.1	58.16	337	76	6	1	274	28	362	4e-125	371
augustus_masked-tulip_contig_298_pilon_pilon-processed-gene-0.20-mRNA-1	JAA91956.1 Uncharacterized protein, partial [Pararge aegeria]	JAA91956.1	92.63	95	4	1	191	282	21	115	1e-50	174
augustus_masked-tulip_contig_298_pilon_pilon-processed-gene-0.21-mRNA-1	XP_026747001.1 zinc finger BED domain-containing protein 1-like [Trichoplusia ni]	XP_026747001.1	52.54	59	28	0	1	59	1	59	3e-15	78.6
maker-tulip_contig_467_pilon_pilon-augustus-gene-0.0-mRNA-1	XP_022823164.1 lysozyme-like [Spodoptera litura]	XP_022823164.1	92.13	89	7	0	13	101	24	112	7e-55	177
augustus_masked-tulip_contig_572_pilon_pilon-processed-gene-0.48-mRNA-1	XP_026729784.1 uncharacterized protein LOC113495309 [Trichoplusia ni]	XP_026729784.1	46.49	228	109	4	56	281	285	501	9e-59	207
augustus_masked-tulip_contig_572_pilon_pilon-processed-gene-0.49-mRNA-1	PCG70195.1 hypothetical protein B5V51_3267, partial [Heliothis virescens]	PCG70195.1	51.43	70	21	2	15	82	21	79	2e-06	52
maker-tulip_contig_572_pilon_pilon-augustus-gene-0.0-mRNA-1	XP_022834541.1 piggyBac transposable element-derived protein 3-like [Spodoptera litura]	XP_022834541.1	97.47	475	12	0	1	475	17	491	0	959
augustus_masked-tulip_contig_572_pilon_pilon-processed-gene-0.51-mRNA-1	XP_026760321.1 putative nuclease HARBI1 [Galleria mellonella]	XP_026760321.1	64.55	110	38	1	1	110	1	109	4e-42	145
maker-tulip_contig_572_pilon_pilon-augustus-gene-0.2-mRNA-1	XP_026318753.1 uncharacterized protein LOC113229397 [Hyposmocoma kahamanoa]	XP_026318753.1	57.14	98	32	1	8	95	160	257	1e-26	110
maker-tulip_contig_572_pilon_pilon-augustus-gene-0.3-mRNA-1	XP_022115746.1 LOW QUALITY PROTEIN: uncharacterized protein LOC110993700 [Pieris rapae]	XP_022115746.1	95.18	83	4	0	71	153	530	612	2e-42	156
maker-tulip_contig_572_pilon_pilon-augustus-gene-0.4-mRNA-1	XP_008186830.1 PREDICTED: piggyBac transposable element-derived protein 3-like [Acyrthosiphon pisum]	XP_008186830.1	72.92	48	13	0	211	258	137	184	4e-14	77
augustus_masked-tulip_contig_572_pilon_pilon-processed-gene-0.57-mRNA-1	XP_008553406.2 PREDICTED: zinc finger BED domain-containing protein 1-like [Microplitis demolitor]	XP_008553406.2	72.95	244	38	2	1	244	280	495	3e-112	341
maker-tulip_contig_572_pilon_pilon-augustus-gene-0.8-mRNA-1	PCG71145.1 hypothetical protein B5V51_2190 [Heliothis virescens]	PCG71145.1	82.72	434	38	3	1	423	1	408	0	702
maker-tulip_contig_572_pilon_pilon-augustus-gene-0.9-mRNA-1	XP_026743762.1 protein VAC14 homolog isoform X1 [Trichoplusia ni]	XP_026743762.1	61.9	63	21	2	57	117	638	699	6e-10	63.5
maker-tulip_contig_572_pilon_pilon-augustus-gene-0.16-mRNA-1	XP_022817067.1 cactin [Spodoptera litura]	XP_022817067.1	91.88	345	24	1	1	345	2	342	0	542
augustus_masked-tulip_contig_572_pilon_pilon-processed-gene-0.60-mRNA-1	XP_026743711.1 cactin [Trichoplusia ni]	XP_026743711.1	97.67	43	1	0	18	60	345	387	2e-20	91.7
maker-tulip_contig_572_pilon_pilon-augustus-gene-0.13-mRNA-1	XP_026743711.1 cactin [Trichoplusia ni]	XP_026743711.1	71.92	317	60	5	1	301	389	692	1e-150	448
maker-tulip_contig_572_pilon_pilon-augustus-gene-0.20-mRNA-1	XP_022817079.1 LOW QUALITY PROTEIN: uncharacterized protein LOC111349946 [Spodoptera litura]	XP_022817079.1	71.26	341	65	4	1	339	1	310	2e-138	414
maker-tulip_contig_572_pilon_pilon-augustus-gene-0.21-mRNA-1	KPJ10377.1 hypothetical protein RR48_09511 [Papilio machaon]	KPJ10377.1	37.5	216	60	5	1	143	369	582	1e-26	114
augustus_masked-tulip_contig_572_pilon_pilon-processed-gene-0.66-mRNA-1	XP_022815048.1 uncharacterized protein LOC111348610 [Spodoptera litura]	XP_022815048.1	82.27	203	9	1	1	203	1	176	8e-106	311
maker-tulip_contig_572_pilon_pilon-augustus-gene-0.28-mRNA-1	XP_022817113.1 igLON family member 5-like [Spodoptera litura]	XP_022817113.1	74.05	185	9	2	47	195	157	338	4e-88	275
augustus_masked-tulip_contig_572_pilon_pilon-processed-gene-0.70-mRNA-1	XP_022834720.1 uncharacterized protein LOC111362298 [Spodoptera litura]	XP_022834720.1	98.24	340	6	0	32	371	54	393	0	691
maker-tulip_contig_572_pilon_pilon-augustus-gene-0.31-mRNA-1	XP_026331553.1 uncharacterized protein LOC113238919 [Hyposmocoma kahamanoa]	XP_026331553.1	39.67	305	140	8	1	263	246	548	2e-44	166
augustus_masked-tulip_contig_572_pilon_pilon-processed-gene-0.72-mRNA-1	XP_022823927.1 uncharacterized protein LOC111354613 [Spodoptera litura]	XP_022823927.1	90.4	125	12	0	78	202	1	125	1e-76	241
augustus_masked-tulip_contig_572_pilon_pilon-processed-gene-0.74-mRNA-1	JAT79518.1 hypothetical protein g.12896 [Pectinophora gossypiella]	JAT79518.1	78.92	166	35	0	1	166	195	360	2e-92	290
augustus_masked-tulip_contig_572_pilon_pilon-processed-gene-0.76-mRNA-1	OWR41286.1 hypothetical protein KGM_202837A, partial [Danaus plexippus plexippus]	OWR41286.1	88.33	120	14	0	92	211	1	120	2e-68	217
augustus_masked-tulip_contig_572_pilon_pilon-processed-gene-0.77-mRNA-1	XP_013189495.1 PREDICTED: uncharacterized protein LOC106134085 [Amyelois transitella]	XP_013189495.1	48.98	49	25	0	33	81	711	759	3e-07	55.1
augustus_masked-tulip_contig_572_pilon_pilon-processed-gene-0.78-mRNA-1	XP_026743699.1 E3 ubiquitin-protein ligase AMFR-like [Trichoplusia ni]	XP_026743699.1	84	75	7	2	69	143	413	482	8e-21	98.6
augustus_masked-tulip_contig_572_pilon_pilon-processed-gene-0.79-mRNA-1	XP_021190408.1 E3 ubiquitin-protein ligase AMFR-like [Helicoverpa armigera]	XP_021190408.1	84.48	174	20	1	41	207	95	268	3e-86	278
maker-tulip_contig_572_pilon_pilon-augustus-gene-0.40-mRNA-1	XP_022835575.1 LOW QUALITY PROTEIN: serine/threonine-protein kinase TBK1 [Spodoptera litura]	XP_022835575.1	69.23	182	35	5	5	168	549	727	2e-50	180
maker-tulip_contig_572_pilon_pilon-augustus-gene-0.41-mRNA-1	KPI94496.1 Inhibitor of nuclear factor kappa-B kinase subunit epsilon [Papilio xuthus]	KPI94496.1	80.49	446	46	3	1	406	1	445	0	739
augustus_masked-tulip_contig_572_pilon_pilon-processed-gene-0.82-mRNA-1	JAV79677.1 hypothetical protein [Photinus pyralis]	JAV79677.1	32.98	94	59	2	1	94	414	503	6e-06	51.2
maker-tulip_contig_572_pilon_pilon-augustus-gene-0.44-mRNA-1	KPJ08404.1 THAP domain-containing protein 1 [Papilio machaon]	KPJ08404.1	33.65	104	62	4	39	140	146	244	1e-07	57.4
augustus_masked-tulip_contig_572_pilon_pilon-processed-gene-0.84-mRNA-1	XP_022816210.1 NADH dehydrogenase [ubiquinone] iron-sulfur protein 3, mitochondrial-like [Spodoptera litura]	XP_022816210.1	94.72	265	14	0	1	265	1	265	0	521
augustus_masked-tulip_contig_572_pilon_pilon-processed-gene-0.85-mRNA-1	XP_022815037.1 uroporphyrinogen-III synthase-like [Spodoptera litura]	XP_022815037.1	90.2	245	24	0	1	245	1	245	1e-164	466
maker-tulip_contig_572_pilon_pilon-augustus-gene-0.26-mRNA-1	RVE52951.1 hypothetical protein evm_002428 [Chilo suppressalis]	RVE52951.1	59.27	248	78	3	7	234	73	317	6e-59	198
maker-tulip_contig_572_pilon_pilon-augustus-gene-0.30-mRNA-1	RVE51723.1 hypothetical protein evm_003695 [Chilo suppressalis]	RVE51723.1	60.87	207	77	3	7	210	359	564	1e-76	251
augustus_masked-tulip_contig_165_pilon_pilon-processed-gene-0.2-mRNA-1	XP_013185039.1 PREDICTED: uncharacterized protein LOC106130686, partial [Amyelois transitella]	XP_013185039.1	55.7	149	58	1	89	229	137	285	2e-49	173
maker-tulip_contig_165_pilon_pilon-augustus-gene-0.4-mRNA-1	XP_021197411.1 voltage-dependent L-type calcium channel subunit beta-3 isoform X14 [Helicoverpa armigera]	XP_021197411.1	59.49	79	21	4	21	92	404	478	2e-13	74.3
maker-tulip_contig_407_pilon_pilon-augustus-gene-0.30-mRNA-1	JAT82022.1 hypothetical protein g.15710, partial [Pectinophora gossypiella]	JAT82022.1	57.66	111	46	1	101	211	276	385	2e-35	137
augustus_masked-tulip_contig_407_pilon_pilon-processed-gene-0.2-mRNA-1	XP_022820369.1 uncharacterized protein LOC111352218 [Spodoptera litura]	XP_022820369.1	86.58	298	40	0	1	298	1	298	0	522
augustus_masked-tulip_contig_407_pilon_pilon-processed-gene-0.3-mRNA-1	XP_022820337.1 arginase, hepatic isoform X3 [Spodoptera litura]	XP_022820337.1	88.99	327	15	1	1	306	1	327	0	585
maker-tulip_contig_407_pilon_pilon-augustus-gene-0.32-mRNA-1	XP_022820384.1 uncharacterized protein LOC111352223 [Spodoptera litura]	XP_022820384.1	82.73	139	24	0	1	139	3	141	2e-78	239
maker-tulip_contig_407_pilon_pilon-augustus-gene-0.33-mRNA-1	XP_022825582.1 FK506-binding protein 15-like [Spodoptera litura]	XP_022825582.1	84.49	535	69	1	1	521	1	535	0	924
maker-tulip_contig_407_pilon_pilon-augustus-gene-0.40-mRNA-1	XP_022825562.1 zinc finger CCCH-type with G patch domain-containing protein isoform X1 [Spodoptera litura]	XP_022825562.1	93.78	547	33	1	1	547	1	546	0	1033
maker-tulip_contig_407_pilon_pilon-augustus-gene-0.41-mRNA-1	XP_022820684.1 uncharacterized protein LOC111352415 isoform X2 [Spodoptera litura]	XP_022820684.1	92.92	1384	72	4	1	1359	1	1383	0	2343
maker-tulip_contig_407_pilon_pilon-augustus-gene-0.43-mRNA-1	XP_021182851.1 host cell factor-like [Helicoverpa armigera]	XP_021182851.1	86.61	605	46	8	1	585	1	590	0	907
maker-tulip_contig_407_pilon_pilon-augustus-gene-0.45-mRNA-1	ABU62829.1 serpin-2 [Spodoptera exigua]	ABU62829.1	79.14	374	26	2	25	346	1	374	0	557
maker-tulip_contig_407_pilon_pilon-augustus-gene-0.50-mRNA-1	XP_022827737.1 uncharacterized protein LOC111357326 isoform X2 [Spodoptera litura]	XP_022827737.1	61.71	457	104	7	1	390	1	453	0	539
maker-tulip_contig_407_pilon_pilon-augustus-gene-0.51-mRNA-1	XP_022827744.1 ovalbumin-related protein Y-like isoform X3 [Spodoptera litura]	XP_022827744.1	92.31	104	8	0	1	104	332	435	9e-63	206
maker-tulip_contig_407_pilon_pilon-augustus-gene-0.54-mRNA-1	XP_022822927.1 protein Mpv17 [Spodoptera litura]	XP_022822927.1	90.1	192	19	0	1	192	1	192	5e-126	363
maker-tulip_contig_407_pilon_pilon-augustus-gene-0.56-mRNA-1	XP_022822878.1 S-formylglutathione hydrolase isoform X2 [Spodoptera litura]	XP_022822878.1	96.52	287	10	0	1	287	1	287	0	582
maker-tulip_contig_407_pilon_pilon-augustus-gene-0.59-mRNA-1	XP_021181614.1 uncharacterized protein LOC110370189 isoform X2 [Helicoverpa armigera]	XP_021181614.1	53.69	203	84	4	1	202	1	194	3e-68	218
maker-tulip_contig_407_pilon_pilon-augustus-gene-0.61-mRNA-1	XP_022826473.1 odorant receptor 4-like isoform X2 [Spodoptera litura]	XP_022826473.1	91.42	233	17	1	19	248	108	340	1e-150	434
maker-tulip_contig_407_pilon_pilon-augustus-gene-0.63-mRNA-1	XP_022820319.1 zinc finger protein 622 [Spodoptera litura]	XP_022820319.1	97.26	401	10	1	1	401	1	400	0	815
maker-tulip_contig_407_pilon_pilon-augustus-gene-0.64-mRNA-1	XP_022825543.1 uncharacterized protein LOC111355680 isoform X3 [Spodoptera litura]	XP_022825543.1	90.23	440	16	4	277	690	325	763	0	772
maker-tulip_contig_407_pilon_pilon-augustus-gene-0.68-mRNA-1	XP_022825365.1 rab-like protein 6 isoform X1 [Spodoptera litura]	XP_022825365.1	94.23	589	30	1	1	585	1	589	0	1076
maker-tulip_contig_407_pilon_pilon-augustus-gene-0.70-mRNA-1	XP_021201261.1 regulating synaptic membrane exocytosis protein 1 [Helicoverpa armigera]	XP_021201261.1	98.56	209	2	1	18	225	1709	1917	8e-133	420
maker-tulip_contig_407_pilon_pilon-augustus-gene-0.71-mRNA-1	XP_021201261.1 regulating synaptic membrane exocytosis protein 1 [Helicoverpa armigera]	XP_021201261.1	72.16	916	223	16	25	931	819	1711	0	1125
maker-tulip_contig_407_pilon_pilon-augustus-gene-0.72-mRNA-1	XP_021201261.1 regulating synaptic membrane exocytosis protein 1 [Helicoverpa armigera]	XP_021201261.1	94.62	818	19	2	1	793	1	818	0	1609
augustus_masked-tulip_contig_407_pilon_pilon-processed-gene-0.24-mRNA-1	PCG73909.1 hypothetical protein B5V51_14140 [Heliothis virescens]	PCG73909.1	65.31	147	48	2	1	147	1	144	3e-57	184
augustus_masked-tulip_contig_407_pilon_pilon-processed-gene-0.26-mRNA-1	XP_022827766.1 neuronal acetylcholine receptor subunit alpha-5-like [Spodoptera litura]	XP_022827766.1	96.51	430	15	0	37	466	1	430	0	873
maker-tulip_contig_407_pilon_pilon-augustus-gene-0.88-mRNA-1	XP_022827789.1 uncharacterized protein LOC111357365 isoform X2 [Spodoptera litura]	XP_022827789.1	88.99	218	24	0	1	218	1	218	3e-145	414
augustus_masked-tulip_contig_407_pilon_pilon-processed-gene-0.28-mRNA-1	XP_021200891.1 dnaJ homolog subfamily C member 5 isoform X2 [Helicoverpa armigera]	XP_021200891.1	99.49	195	1	0	1	195	1	195	3e-142	405
maker-tulip_contig_407_pilon_pilon-augustus-gene-0.90-mRNA-1	XP_022822859.1 presenilins-associated rhomboid-like protein, mitochondrial [Spodoptera litura]	XP_022822859.1	95.14	350	17	0	1	350	1	350	0	698
augustus_masked-tulip_contig_407_pilon_pilon-processed-gene-1.0-mRNA-1	XP_022825811.1 saccharopine dehydrogenase-like oxidoreductase [Spodoptera litura]	XP_022825811.1	93.57	420	27	0	1	420	1	420	0	830
maker-tulip_contig_407_pilon_pilon-augustus-gene-1.23-mRNA-1	XP_022826641.1 sodium-dependent phosphate transporter 1-A isoform X1 [Spodoptera litura]	XP_022826641.1	86.97	499	13	1	1	447	1	499	0	858
maker-tulip_contig_407_pilon_pilon-augustus-gene-1.26-mRNA-1	XP_022820187.1 lipopolysaccharide-induced tumor necrosis factor-alpha factor homolog isoform X1 [Spodoptera litura]	XP_022820187.1	80.6	134	11	1	1	134	1	119	1e-58	187
maker-tulip_contig_407_pilon_pilon-augustus-gene-1.28-mRNA-1	XP_021185950.1 lipopolysaccharide-induced tumor necrosis factor-alpha factor homolog [Helicoverpa armigera]	XP_021185950.1	80.95	105	20	0	1	105	1	105	7e-60	188
augustus_masked-tulip_contig_407_pilon_pilon-processed-gene-1.4-mRNA-1	XP_022824784.1 uncharacterized protein LOC111355236 [Spodoptera litura]	XP_022824784.1	95.4	239	8	2	1	238	24	260	1e-155	443
maker-tulip_contig_407_pilon_pilon-augustus-gene-1.31-mRNA-1	XP_022825854.1 transcription termination factor 5, mitochondrial-like [Spodoptera litura]	XP_022825854.1	76.17	533	38	3	1	445	1	532	0	804
augustus_masked-tulip_contig_407_pilon_pilon-processed-gene-1.6-mRNA-1	XP_022828426.1 mitochondrial chaperone BCS1 [Spodoptera litura]	XP_022828426.1	98.91	275	3	0	1	275	1	275	0	578
maker-tulip_contig_407_pilon_pilon-augustus-gene-1.36-mRNA-1	XP_022822115.1 nicastrin [Spodoptera litura]	XP_022822115.1	89.7	631	30	2	1	596	1	631	0	1144
maker-tulip_contig_407_pilon_pilon-augustus-gene-1.39-mRNA-1	XP_022822939.1 cytosolic non-specific dipeptidase [Spodoptera litura]	XP_022822939.1	95.06	526	26	0	1	526	1	526	0	1042
augustus_masked-tulip_contig_407_pilon_pilon-processed-gene-1.8-mRNA-1	XP_022824161.1 serine protease inhibitor 88Ea-like [Spodoptera litura]	XP_022824161.1	93.2	412	15	1	1	399	1	412	0	784
maker-tulip_contig_407_pilon_pilon-augustus-gene-1.46-mRNA-1	XP_022820175.1 integrator complex subunit 8 [Spodoptera litura]	XP_022820175.1	98.03	152	3	0	1	152	897	1048	2e-94	303
maker-tulip_contig_407_pilon_pilon-augustus-gene-1.47-mRNA-1	XP_022820175.1 integrator complex subunit 8 [Spodoptera litura]	XP_022820175.1	92.8	764	48	2	1	764	1	757	0	1394
maker-tulip_contig_407_pilon_pilon-augustus-gene-1.50-mRNA-1	XP_022826544.1 lipopolysaccharide-induced tumor necrosis factor-alpha factor-like [Spodoptera litura]	XP_022826544.1	97.86	140	3	0	1	140	1	140	1e-91	271
maker-tulip_contig_407_pilon_pilon-augustus-gene-1.51-mRNA-1	XP_022821801.1 stromelysin-3 isoform X1 [Spodoptera litura]	XP_022821801.1	97.63	380	9	0	18	397	218	597	0	771
maker-tulip_contig_407_pilon_pilon-augustus-gene-1.52-mRNA-1	XP_022821826.1 matrix metalloproteinase-14 isoform X3 [Spodoptera litura]	XP_022821826.1	100	135	0	0	1	135	62	196	7e-90	281
maker-tulip_contig_407_pilon_pilon-augustus-gene-1.53-mRNA-1	XP_022826171.1 beta-galactoside alpha-2,6-sialyltransferase 2 [Spodoptera litura]	XP_022826171.1	75.59	213	13	2	12	185	251	463	5e-107	324
maker-tulip_contig_407_pilon_pilon-augustus-gene-1.54-mRNA-1	XP_022826171.1 beta-galactoside alpha-2,6-sialyltransferase 2 [Spodoptera litura]	XP_022826171.1	89.96	259	26	0	1	259	1	259	1e-172	496
maker-tulip_contig_407_pilon_pilon-augustus-gene-1.55-mRNA-1	XP_022827614.1 transmembrane protein 43 homolog isoform X1 [Spodoptera litura]	XP_022827614.1	91.84	392	19	1	1	379	1	392	0	752
maker-tulip_contig_407_pilon_pilon-augustus-gene-1.62-mRNA-1	XP_022828556.1 retinal homeobox protein Rx2-like [Spodoptera litura]	XP_022828556.1	97.86	373	8	0	1	373	1	373	0	757
augustus_masked-tulip_contig_407_pilon_pilon-processed-gene-1.19-mRNA-1	XP_022818603.1 uncharacterized protein LOC111351065 [Spodoptera litura]	XP_022818603.1	64.86	387	122	9	349	726	51	432	4e-146	444
maker-tulip_contig_407_pilon_pilon-augustus-gene-1.71-mRNA-1	XP_022825448.1 uncharacterized protein LOC111355652 [Spodoptera litura]	XP_022825448.1	77.99	827	167	9	1	822	2	818	0	1227
maker-tulip_contig_407_pilon_pilon-augustus-gene-1.73-mRNA-1	XP_022822523.1 uncharacterized protein LOC111353662 [Spodoptera litura]	XP_022822523.1	92.81	501	31	2	1	497	1	500	0	862
augustus_masked-tulip_contig_407_pilon_pilon-processed-gene-1.22-mRNA-1	XP_022823102.1 asparagine-rich zinc finger protein AZF1 [Spodoptera litura]	XP_022823102.1	98.42	569	7	2	1	568	1	568	0	1159
maker-tulip_contig_407_pilon_pilon-augustus-gene-2.0-mRNA-1	XP_022818849.1 serine/threonine-protein kinase mig-15 isoform X2 [Spodoptera litura]	XP_022818849.1	95.55	1393	16	2	1	1347	1	1393	0	2738
maker-tulip_contig_407_pilon_pilon-augustus-gene-2.5-mRNA-1	XP_022820764.1 proline-rich protein HaeIII subfamily 1-like [Spodoptera litura]	XP_022820764.1	97.27	366	9	1	1	366	1	365	0	619
augustus_masked-tulip_contig_407_pilon_pilon-processed-gene-2.53-mRNA-1	XP_022822767.1 very-long-chain (3R)-3-hydroxyacyl-CoA dehydratase hpo-8 [Spodoptera litura]	XP_022822767.1	98.28	232	4	0	1	232	1	232	2e-166	469
maker-tulip_contig_407_pilon_pilon-augustus-gene-2.10-mRNA-1	XP_022822755.1 uncharacterized protein LOC111353804 [Spodoptera litura]	XP_022822755.1	95.2	250	12	0	33	282	1	250	3e-163	464
maker-tulip_contig_407_pilon_pilon-augustus-gene-2.12-mRNA-1	XP_022826556.1 bystin [Spodoptera litura]	XP_022826556.1	96.49	427	11	1	1	427	1	423	0	850
maker-tulip_contig_407_pilon_pilon-augustus-gene-2.14-mRNA-1	AUO38741.1 ABCC3 protein [Spodoptera frugiperda]	AUO38741.1	79.69	1359	93	11	1	1176	1	1359	0	2110
augustus_masked-tulip_contig_407_pilon_pilon-processed-gene-2.56-mRNA-1	XP_022822031.1 multidrug resistance-associated protein 4-like isoform X1 [Spodoptera litura]	XP_022822031.1	100	75	0	0	1	75	1	75	3e-48	172
maker-tulip_contig_407_pilon_pilon-augustus-gene-2.17-mRNA-1	XP_024873932.1 uncharacterized protein LOC112455941, partial [Temnothorax curvispinosus]	XP_024873932.1	37.79	696	393	17	43	709	414	1098	8e-141	459
augustus_masked-tulip_contig_407_pilon_pilon-processed-gene-2.58-mRNA-1	XP_011569045.1 PREDICTED: uncharacterized protein LOC105398601 [Plutella xylostella]	XP_011569045.1	63	100	36	1	1	100	13	111	2e-35	136
augustus_masked-tulip_contig_407_pilon_pilon-processed-gene-2.59-mRNA-1	PZC79890.1 hypothetical protein B5X24_HaOG215654 [Helicoverpa armigera]	PZC79890.1	51.41	568	256	7	2	562	1178	1732	0	593
maker-tulip_contig_407_pilon_pilon-augustus-gene-2.18-mRNA-1	XP_021196505.1 multidrug resistance-associated protein 4 isoform X1 [Helicoverpa armigera]	XP_021196505.1	90.1	1394	64	5	17	1410	75	1394	0	2524
augustus_masked-tulip_contig_407_pilon_pilon-processed-gene-2.61-mRNA-1	XP_022827498.1 uncharacterized protein CG16817-like [Spodoptera litura]	XP_022827498.1	96.82	157	5	0	1	157	1	157	1e-106	311
maker-tulip_contig_407_pilon_pilon-augustus-gene-2.21-mRNA-1	XP_022836184.1 putative leucine-rich repeat-containing protein DDB_G0290503 [Spodoptera litura]	XP_022836184.1	90.18	1344	130	2	1	1344	1	1342	0	2340
augustus_masked-tulip_contig_407_pilon_pilon-processed-gene-2.64-mRNA-1	PZC87077.1 hypothetical protein B5X24_HaOG201313 [Helicoverpa armigera]	PZC87077.1	85.16	128	19	0	1	128	1	128	1e-76	233
maker-tulip_contig_407_pilon_pilon-augustus-gene-2.23-mRNA-1	XP_022819947.1 U7 snRNA-associated Sm-like protein LSm10 [Spodoptera litura]	XP_022819947.1	87.12	132	17	0	1	132	1	132	6e-83	249
augustus_masked-tulip_contig_407_pilon_pilon-processed-gene-2.67-mRNA-1	PCG74495.1 hypothetical protein B5V51_13237 [Heliothis virescens]	PCG74495.1	79.39	131	27	0	2	132	1	131	2e-69	214
maker-tulip_contig_407_pilon_pilon-augustus-gene-2.27-mRNA-1	AAK92165.1 ribosomal protein L30 [Spodoptera frugiperda]	AAK92165.1	100	113	0	0	1	113	1	113	4e-76	230
maker-tulip_contig_407_pilon_pilon-augustus-gene-2.30-mRNA-1	XP_022820730.1 potassium voltage-gated channel unc-103-like isoform X3 [Spodoptera litura]	XP_022820730.1	99.3	711	5	0	12	722	222	932	0	1456
augustus_masked-tulip_contig_407_pilon_pilon-processed-gene-2.71-mRNA-1	KPJ13566.1 Potassium voltage-gated channel subfamily H member 7 [Papilio machaon]	KPJ13566.1	85.86	198	17	3	1	197	1	188	2e-106	337
maker-tulip_contig_407_pilon_pilon-augustus-gene-2.36-mRNA-1	AIB06821.1 ABCC2 [Spodoptera exigua]	AIB06821.1	91.29	1343	13	7	1	1239	1	1343	0	2398
augustus_masked-tulip_contig_407_pilon_pilon-processed-gene-2.73-mRNA-1	XP_022829083.1 uncharacterized protein LOC111358254 isoform X2 [Spodoptera litura]	XP_022829083.1	73.62	1797	407	14	2	1748	33	1812	0	2623
augustus_masked-tulip_contig_407_pilon_pilon-processed-gene-2.74-mRNA-1	XP_022823616.1 zinc finger matrin-type protein 3-like [Spodoptera litura]	XP_022823616.1	62.82	347	78	8	37	335	1	344	1e-136	402
maker-tulip_contig_407_pilon_pilon-augustus-gene-2.48-mRNA-1	XP_022836185.1 uncharacterized protein C9orf85 homolog [Spodoptera litura]	XP_022836185.1	79.38	194	20	2	1	177	1	191	5e-102	301
maker-tulip_contig_407_pilon_pilon-augustus-gene-3.1-mRNA-1	AAL26575.1 ribosomal protein L8 [Spodoptera frugiperda]	AAL26575.1	100	257	0	0	1	257	1	257	0	518
augustus_masked-tulip_contig_407_pilon_pilon-processed-gene-3.53-mRNA-1	PZC78267.1 hypothetical protein B5X24_HaOG202339 [Helicoverpa armigera]	PZC78267.1	75.23	440	109	0	1	440	1	440	0	683
augustus_masked-tulip_contig_407_pilon_pilon-processed-gene-3.54-mRNA-1	XP_022829844.1 DNA replication complex GINS protein SLD5 [Spodoptera litura]	XP_022829844.1	97.85	186	4	0	1	186	1	186	1e-131	378
augustus_masked-tulip_contig_407_pilon_pilon-processed-gene-3.55-mRNA-1	PCG62825.1 hypothetical protein B5V51_13562 [Heliothis virescens]	PCG62825.1	93.83	454	22	3	1	448	1	454	0	869
maker-tulip_contig_407_pilon_pilon-augustus-gene-3.12-mRNA-1	XP_022821011.1 uncharacterized protein LOC111352643 [Spodoptera litura]	XP_022821011.1	98.23	226	4	0	1	226	1	226	6e-162	457
maker-tulip_contig_407_pilon_pilon-augustus-gene-3.13-mRNA-1	XP_022821022.1 uncharacterized protein LOC111352652 [Spodoptera litura]	XP_022821022.1	99.1	222	2	0	1	222	1	222	3e-161	455
maker-tulip_contig_407_pilon_pilon-augustus-gene-3.14-mRNA-1	XP_022820999.1 uncharacterized protein LOC111352634 [Spodoptera litura]	XP_022820999.1	99.18	243	2	0	1	243	1	243	7e-177	496
maker-tulip_contig_407_pilon_pilon-augustus-gene-3.24-mRNA-1	XP_026730869.1 uncharacterized protein LOC113496015 [Trichoplusia ni]	XP_026730869.1	76.29	447	56	4	1	397	1	447	0	660
augustus_masked-tulip_contig_407_pilon_pilon-processed-gene-3.60-mRNA-1	XP_022820988.1 CD82 antigen-like [Spodoptera litura]	XP_022820988.1	99.73	367	1	0	1	367	1	367	0	735
maker-tulip_contig_407_pilon_pilon-augustus-gene-3.25-mRNA-1	PCG75415.1 hypothetical protein B5V51_11749 [Heliothis virescens]	PCG75415.1	93.58	187	12	0	1	187	1	187	1e-130	382
augustus_masked-tulip_contig_407_pilon_pilon-processed-gene-3.62-mRNA-1	XP_022820957.1 EF-hand domain-containing protein 1-like [Spodoptera litura]	XP_022820957.1	84.92	590	48	1	2	550	240	829	0	948
augustus_masked-tulip_contig_407_pilon_pilon-processed-gene-3.63-mRNA-1	XP_022836337.1 neuronal membrane glycoprotein M6-b-like [Spodoptera litura]	XP_022836337.1	100	249	0	0	1	249	1	249	0	511
augustus_masked-tulip_contig_407_pilon_pilon-processed-gene-3.52-mRNA-1	XP_022819918.1 cryptochrome-1-like isoform X1 [Spodoptera litura]	XP_022819918.1	91.3	793	21	3	1	747	24	814	0	1481
maker-tulip_contig_407_pilon_pilon-augustus-gene-3.33-mRNA-1	XP_022829806.1 zinc finger protein DZIP1L [Spodoptera litura]	XP_022829806.1	85.33	1104	142	5	1	1096	1	1092	0	1842
maker-tulip_contig_407_pilon_pilon-augustus-gene-3.36-mRNA-1	AHA48192.1 long-wavelength opsin [Spodoptera exigua]	AHA48192.1	100	381	0	0	1	381	1	381	0	782
augustus_masked-tulip_contig_407_pilon_pilon-processed-gene-3.67-mRNA-1	XP_026764659.1 multidrug resistance-associated protein 4-like [Galleria mellonella]	XP_026764659.1	83.01	465	54	1	62	501	851	1315	0	781
augustus_masked-tulip_contig_407_pilon_pilon-processed-gene-3.68-mRNA-1	XP_022829795.1 multidrug resistance-associated protein 4-like [Spodoptera litura]	XP_022829795.1	98.14	644	12	0	15	658	24	667	0	1303
maker-tulip_contig_407_pilon_pilon-augustus-gene-3.42-mRNA-1	XP_022823637.1 COMM domain-containing protein 2-like [Spodoptera litura]	XP_022823637.1	88.75	240	24	1	1	237	1	240	6e-150	427
maker-tulip_contig_407_pilon_pilon-augustus-gene-3.44-mRNA-1	XP_022821965.1 succinate--CoA ligase [ADP-forming] subunit beta, mitochondrial [Spodoptera litura]	XP_022821965.1	95.8	452	19	0	1	452	1	452	0	888
augustus_masked-tulip_contig_407_pilon_pilon-processed-gene-3.71-mRNA-1	XP_022828438.1 transcription termination factor 5, mitochondrial-like [Spodoptera litura]	XP_022828438.1	85.96	527	74	0	1	527	39	565	0	940
augustus_masked-tulip_contig_407_pilon_pilon-processed-gene-3.72-mRNA-1	XP_022820970.1 pseudouridine-metabolizing bifunctional protein C1861.05 [Spodoptera litura]	XP_022820970.1	71.76	131	37	0	1	131	569	699	3e-57	197
maker-tulip_contig_407_pilon_pilon-augustus-gene-3.48-mRNA-1	XP_022820970.1 pseudouridine-metabolizing bifunctional protein C1861.05 [Spodoptera litura]	XP_022820970.1	85.02	434	32	1	1	434	1	401	0	743
augustus_masked-tulip_contig_407_pilon_pilon-processed-gene-3.74-mRNA-1	AIH07604.1 microsomal glutathione S-transferase 1-2 [Spodoptera litura]	AIH07604.1	93.33	150	10	0	1	150	1	150	2e-97	287
augustus_masked-tulip_contig_407_pilon_pilon-processed-gene-3.75-mRNA-1	AYM01171.1 glutathione-S-transferase microsomal [Spodoptera littoralis]	AYM01171.1	78	150	33	0	1	150	1	150	6e-79	240
augustus_masked-tulip_contig_407_pilon_pilon-processed-gene-3.76-mRNA-1	AIH07603.1 microsomal glutathione S-transferase 1-1 [Spodoptera litura]	AIH07603.1	94.04	151	9	0	1	151	1	151	2e-98	290
maker-tulip_contig_407_pilon_pilon-augustus-gene-3.50-mRNA-1	XP_022829367.1 probable Golgi SNAP receptor complex member 2 [Spodoptera litura]	XP_022829367.1	97.61	209	5	0	1	209	1	209	4e-148	421
augustus_masked-tulip_contig_407_pilon_pilon-processed-gene-4.1-mRNA-1	PZC87099.1 hypothetical protein B5X24_HaOG201335 [Helicoverpa armigera]	PZC87099.1	68.17	578	106	9	23	522	101	678	0	733
maker-tulip_contig_407_pilon_pilon-augustus-gene-4.19-mRNA-1	XP_022823214.1 proteoglycan 4-like isoform X1 [Spodoptera litura]	XP_022823214.1	92.56	336	25	0	1	336	1	336	0	653
maker-tulip_contig_407_pilon_pilon-augustus-gene-4.20-mRNA-1	XP_022823214.1 proteoglycan 4-like isoform X1 [Spodoptera litura]	XP_022823214.1	72.26	584	54	10	4	487	358	933	0	652
maker-tulip_contig_407_pilon_pilon-augustus-gene-4.30-mRNA-1	XP_022823661.1 aquaporin AQPAe.a [Spodoptera litura]	XP_022823661.1	94.04	285	1	1	47	331	1	269	0	518
maker-tulip_contig_407_pilon_pilon-augustus-gene-4.33-mRNA-1	XP_022829243.1 uncharacterized protein LOC111358359 [Spodoptera litura]	XP_022829243.1	93.08	1401	65	7	1	1381	1	1389	0	2525
maker-tulip_contig_407_pilon_pilon-augustus-gene-4.35-mRNA-1	XP_022829252.1 uncharacterized protein LOC111358365 [Spodoptera litura]	XP_022829252.1	97.31	670	18	0	1	670	1	670	0	1372
maker-tulip_contig_407_pilon_pilon-augustus-gene-4.38-mRNA-1	XP_022825999.1 uncharacterized protein LOC111356031 [Spodoptera litura]	XP_022825999.1	83.33	288	46	2	1	287	1	287	2e-177	501
maker-tulip_contig_407_pilon_pilon-augustus-gene-4.42-mRNA-1	XP_022829233.1 diuretic hormone 1 isoform X3 [Spodoptera litura]	XP_022829233.1	78.01	141	14	2	22	162	1	124	4e-53	177
maker-tulip_contig_407_pilon_pilon-augustus-gene-4.46-mRNA-1	XP_022826966.1 IQ domain-containing protein G-like [Spodoptera litura]	XP_022826966.1	84.71	85	13	0	38	122	58	142	1e-42	151
maker-tulip_contig_407_pilon_pilon-augustus-gene-4.47-mRNA-1	PCG79895.1 hypothetical protein B5V51_13357 [Heliothis virescens]	PCG79895.1	64.57	175	18	1	2	132	124	298	2e-67	215
maker-tulip_contig_407_pilon_pilon-augustus-gene-4.52-mRNA-1	XP_022829344.1 multiple C2 and transmembrane domain-containing protein-like [Spodoptera litura]	XP_022829344.1	85.23	149	10	1	33	169	491	639	1e-77	253
maker-tulip_contig_407_pilon_pilon-augustus-gene-4.53-mRNA-1	XP_022829344.1 multiple C2 and transmembrane domain-containing protein-like [Spodoptera litura]	XP_022829344.1	95.9	293	12	0	8	300	156	448	0	591
maker-tulip_contig_407_pilon_pilon-augustus-gene-4.60-mRNA-1	XP_022825879.1 exostosin-3 [Spodoptera litura]	XP_022825879.1	93.56	838	31	2	5	819	82	919	0	1460
maker-tulip_contig_407_pilon_pilon-augustus-gene-4.61-mRNA-1	XP_022826427.1 zinc finger protein 611-like [Spodoptera litura]	XP_022826427.1	62.8	793	239	6	16	759	1	786	0	972
maker-tulip_contig_407_pilon_pilon-augustus-gene-4.66-mRNA-1	RVE41320.1 hypothetical protein evm_014034 [Chilo suppressalis]	RVE41320.1	51.65	273	132	0	21	293	65	337	1e-85	294
maker-tulip_contig_407_pilon_pilon-augustus-gene-4.67-mRNA-1	XP_022829261.1 decapping and exoribonuclease protein-like [Spodoptera litura]	XP_022829261.1	91.62	382	32	0	1	382	1	382	0	740
maker-tulip_contig_407_pilon_pilon-augustus-gene-4.69-mRNA-1	XP_022823296.1 uncharacterized protein LOC111354184 [Spodoptera litura]	XP_022823296.1	85.96	883	124	0	1	883	1	883	0	1562
maker-tulip_contig_407_pilon_pilon-augustus-gene-4.70-mRNA-1	XP_022825248.1 transmembrane and TPR repeat-containing protein 4-like isoform X2 [Spodoptera litura]	XP_022825248.1	88.43	726	61	2	1	708	1	721	0	1333
maker-tulip_contig_407_pilon_pilon-augustus-gene-4.73-mRNA-1	XP_022828493.1 integrator complex subunit 14 [Spodoptera litura]	XP_022828493.1	85.62	313	10	1	1	278	203	515	0	540
maker-tulip_contig_407_pilon_pilon-augustus-gene-4.74-mRNA-1	XP_022828493.1 integrator complex subunit 14 [Spodoptera litura]	XP_022828493.1	96.89	161	5	0	1	161	1	161	3e-106	323
maker-tulip_contig_407_pilon_pilon-augustus-gene-4.75-mRNA-1	XP_022828404.1 uncharacterized protein LOC111357830 [Spodoptera litura]	XP_022828404.1	78.02	91	20	0	10	100	13	103	3e-47	155
maker-tulip_contig_407_pilon_pilon-augustus-gene-5.21-mRNA-1	XP_022819394.1 uncharacterized protein LOC111351607 isoform X1 [Spodoptera litura]	XP_022819394.1	87.16	405	48	2	3	405	73	475	0	639
maker-tulip_contig_407_pilon_pilon-augustus-gene-5.23-mRNA-1	XP_022824004.1 beta-1,3-galactosyltransferase 6 [Spodoptera litura]	XP_022824004.1	92.84	363	26	0	1	363	1	363	0	709
maker-tulip_contig_407_pilon_pilon-augustus-gene-5.25-mRNA-1	ASQ41641.1 P-glycoprotein [Spodoptera exigua]	ASQ41641.1	83.75	480	43	6	478	932	832	1301	0	773
maker-tulip_contig_407_pilon_pilon-augustus-gene-5.27-mRNA-1	XP_022828807.1 uncharacterized protein LOC111358121 [Spodoptera litura]	XP_022828807.1	97.94	97	2	0	1	97	1	97	3e-63	198
maker-tulip_contig_407_pilon_pilon-augustus-gene-5.29-mRNA-1	ASS36021.1 ABCC4 [Samia ricini]	ASS36021.1	77.85	817	108	8	11	755	555	1370	0	1253
maker-tulip_contig_407_pilon_pilon-augustus-gene-5.30-mRNA-1	AKC34900.1 ABCC4-like protein [Spodoptera litura]	AKC34900.1	94.59	351	19	0	1	351	127	477	0	666
maker-tulip_contig_407_pilon_pilon-augustus-gene-5.47-mRNA-1	XP_022823994.1 UDP-glucuronic acid decarboxylase 1 [Spodoptera litura]	XP_022823994.1	95.05	444	22	0	1	444	1	444	0	867
augustus_masked-tulip_contig_407_pilon_pilon-processed-gene-5.13-mRNA-1	XP_022826933.1 glycerophosphodiester phosphodiesterase GDPD6-like [Spodoptera litura]	XP_022826933.1	89.1	376	41	0	1	376	3	378	0	710
augustus_masked-tulip_contig_407_pilon_pilon-processed-gene-5.14-mRNA-1	XP_022823191.1 glycerophosphodiester phosphodiesterase GDPD6-like [Spodoptera litura]	XP_022823191.1	91.64	383	32	0	1	383	1	383	0	709
augustus_masked-tulip_contig_407_pilon_pilon-processed-gene-5.15-mRNA-1	XP_022826978.1 zinc finger protein ZIC 4-like [Spodoptera litura]	XP_022826978.1	100	207	0	0	31	237	237	443	2e-146	426
augustus_masked-tulip_contig_407_pilon_pilon-processed-gene-5.16-mRNA-1	XP_022826978.1 zinc finger protein ZIC 4-like [Spodoptera litura]	XP_022826978.1	99.17	241	2	0	1	241	1	241	3e-173	495
maker-tulip_contig_407_pilon_pilon-augustus-gene-5.59-mRNA-1	XP_022825953.1 ATP-dependent RNA helicase bel [Spodoptera litura]	XP_022825953.1	93.43	700	15	2	34	702	9	708	0	1311
maker-tulip_contig_407_pilon_pilon-augustus-gene-5.64-mRNA-1	XP_022828774.1 uncharacterized protein LOC111358100 [Spodoptera litura]	XP_022828774.1	90.62	256	24	0	1	256	1	256	2e-145	417
augustus_masked-tulip_contig_407_pilon_pilon-processed-gene-5.19-mRNA-1	XP_022828752.1 filamin-A [Spodoptera litura]	XP_022828752.1	86.03	1797	85	13	1	1652	1110	2885	0	2944
maker-tulip_contig_407_pilon_pilon-augustus-gene-6.15-mRNA-1	PCG73927.1 hypothetical protein B5V51_14119 [Heliothis virescens]	PCG73927.1	78.25	708	63	3	1	617	1	708	0	1091
maker-tulip_contig_407_pilon_pilon-augustus-gene-6.17-mRNA-1	XP_022828631.1 zinc finger protein 395 isoform X2 [Spodoptera litura]	XP_022828631.1	98.81	168	2	0	1	168	250	417	1e-121	359
maker-tulip_contig_407_pilon_pilon-augustus-gene-6.19-mRNA-1	XP_022821955.1 probable serine incorporator isoform X5 [Spodoptera litura]	XP_022821955.1	90.16	437	42	1	1	437	1	436	0	784
augustus_masked-tulip_contig_407_pilon_pilon-processed-gene-6.7-mRNA-1	XP_022822232.1 O-glucosyltransferase rumi homolog [Spodoptera litura]	XP_022822232.1	83.29	413	26	3	1	384	1	399	0	701
augustus_masked-tulip_contig_407_pilon_pilon-processed-gene-6.8-mRNA-1	XP_022819970.1 NAD(P) transhydrogenase, mitochondrial-like [Spodoptera litura]	XP_022819970.1	81.71	257	6	1	1	216	1	257	2e-116	367
maker-tulip_contig_407_pilon_pilon-augustus-gene-6.31-mRNA-1	XP_022819970.1 NAD(P) transhydrogenase, mitochondrial-like [Spodoptera litura]	XP_022819970.1	99.1	780	7	0	1	780	269	1048	0	1561
augustus_masked-tulip_contig_407_pilon_pilon-processed-gene-6.0-mRNA-1	XP_022828752.1 filamin-A [Spodoptera litura]	XP_022828752.1	92.64	883	29	4	1	850	226	1105	0	1647
augustus_masked-tulip_contig_407_pilon_pilon-processed-gene-6.10-mRNA-1	XP_022828752.1 filamin-A [Spodoptera litura]	XP_022828752.1	89.36	235	6	1	1	235	1	216	2e-139	442
maker-tulip_contig_407_pilon_pilon-augustus-gene-6.40-mRNA-1	XP_022825748.1 cyclic nucleotide-gated cation channel alpha-3 isoform X3 [Spodoptera litura]	XP_022825748.1	92.51	227	3	1	26	252	510	722	4e-112	348
maker-tulip_contig_407_pilon_pilon-augustus-gene-6.41-mRNA-1	ERL92243.1 hypothetical protein D910_09560 [Dendroctonus ponderosae]	ERL92243.1	84.83	178	26	1	11	188	49	225	2e-103	310
maker-tulip_contig_407_pilon_pilon-augustus-gene-6.42-mRNA-1	XP_022825741.1 cyclic nucleotide-gated cation channel alpha-3 isoform X2 [Spodoptera litura]	XP_022825741.1	73.11	212	3	2	8	219	1	158	1e-92	296
augustus_masked-tulip_contig_407_pilon_pilon-processed-gene-6.12-mRNA-1	PZC87132.1 hypothetical protein B5X24_HaOG201368 [Helicoverpa armigera]	PZC87132.1	91.11	45	4	0	8	52	712	756	2e-16	82.4
maker-tulip_contig_407_pilon_pilon-augustus-gene-6.55-mRNA-1	XP_022828720.1 flap endonuclease GEN [Spodoptera litura]	XP_022828720.1	79.95	743	66	5	1	661	1	742	0	1196
maker-tulip_contig_407_pilon_pilon-augustus-gene-6.58-mRNA-1	XP_022822161.1 isocitrate dehydrogenase [NADP] cytoplasmic-like [Spodoptera litura]	XP_022822161.1	99.27	411	3	0	16	426	24	434	0	858
maker-tulip_contig_407_pilon_pilon-augustus-gene-7.39-mRNA-1	XP_022819052.1 extended synaptotagmin-2 isoform X2 [Spodoptera litura]	XP_022819052.1	98.32	357	1	1	5	356	2	358	0	721
maker-tulip_contig_407_pilon_pilon-augustus-gene-7.40-mRNA-1	PCG64937.1 hypothetical protein B5V51_9887 [Heliothis virescens]	PCG64937.1	79.07	497	40	5	12	450	1	491	0	748
maker-tulip_contig_407_pilon_pilon-augustus-gene-7.45-mRNA-1	XP_022824116.1 uncharacterized protein LOC111354772 [Spodoptera litura]	XP_022824116.1	92.34	261	20	0	1	261	1	261	4e-175	493
maker-tulip_contig_407_pilon_pilon-augustus-gene-7.47-mRNA-1	XP_022824128.1 ras-like GTP-binding protein RhoL [Spodoptera litura]	XP_022824128.1	100	183	0	0	1	183	1	183	1e-132	379
augustus_masked-tulip_contig_407_pilon_pilon-processed-gene-7.5-mRNA-1	XP_013186598.1 PREDICTED: uncharacterized protein LOC106131883 isoform X1 [Amyelois transitella]	XP_013186598.1	95.8	143	6	0	49	191	407	549	2e-92	290
augustus_masked-tulip_contig_407_pilon_pilon-processed-gene-7.6-mRNA-1	XP_022824087.1 DTW domain-containing protein 1 isoform X1 [Spodoptera litura]	XP_022824087.1	91.21	307	27	0	1	307	1	307	0	597
maker-tulip_contig_407_pilon_pilon-augustus-gene-7.49-mRNA-1	XP_022818595.1 LOW QUALITY PROTEIN: probable ubiquitin carboxyl-terminal hydrolase FAF-X [Spodoptera litura]	XP_022818595.1	99.16	1312	10	1	1	1312	1	1311	0	2692
augustus_masked-tulip_contig_407_pilon_pilon-processed-gene-7.9-mRNA-1	XP_012544515.1 probable ubiquitin carboxyl-terminal hydrolase FAF-X isoform X3 [Bombyx mori]	XP_012544515.1	79.05	1160	151	11	17	1110	1298	2431	0	1844
maker-tulip_contig_407_pilon_pilon-augustus-gene-7.64-mRNA-1	XP_022822073.1 hydroxyacid oxidase 1 [Spodoptera litura]	XP_022822073.1	93.64	346	8	1	30	361	1	346	0	660
maker-tulip_contig_407_pilon_pilon-augustus-gene-7.67-mRNA-1	XP_026323602.1 beta-catenin-like protein 1 [Hyposmocoma kahamanoa]	XP_026323602.1	73.67	562	82	6	1	501	1	557	0	806
maker-tulip_contig_407_pilon_pilon-augustus-gene-7.69-mRNA-1	XP_022826370.1 mediator of RNA polymerase II transcription subunit 14 [Spodoptera litura]	XP_022826370.1	94.85	1087	28	1	1	1059	1	1087	0	1873
maker-tulip_contig_407_pilon_pilon-augustus-gene-7.74-mRNA-1	XP_022822673.1 uncharacterized protein LOC111353753 [Spodoptera litura]	XP_022822673.1	62.61	591	112	5	32	548	23	578	0	713
augustus_masked-tulip_contig_407_pilon_pilon-processed-gene-7.14-mRNA-1	RVE49487.1 hypothetical protein evm_005828 [Chilo suppressalis]	RVE49487.1	63.19	345	118	4	5	346	29	367	7e-152	446
maker-tulip_contig_407_pilon_pilon-augustus-gene-7.79-mRNA-1	XP_022822649.1 pantothenate kinase 4 isoform X2 [Spodoptera litura]	XP_022822649.1	84.53	181	19	2	1	176	1	177	6e-102	306
maker-tulip_contig_407_pilon_pilon-augustus-gene-7.80-mRNA-1	XP_022822641.1 pantothenate kinase 4 isoform X1 [Spodoptera litura]	XP_022822641.1	99.03	206	2	0	1	206	171	376	3e-143	414
augustus_masked-tulip_contig_407_pilon_pilon-processed-gene-7.17-mRNA-1	XP_022818717.1 UDP-glucose:glycoprotein glucosyltransferase [Spodoptera litura]	XP_022818717.1	84.09	1018	71	5	1	927	1	1018	0	1664
maker-tulip_contig_407_pilon_pilon-augustus-gene-7.86-mRNA-1	XP_022828036.1 E3 SUMO-protein ligase RanBP2-like [Spodoptera litura]	XP_022828036.1	89.2	2972	273	13	1	2936	1	2960	0	5318
augustus_masked-tulip_contig_407_pilon_pilon-processed-gene-7.21-mRNA-1	XP_022826060.1 uncharacterized protein LOC111356065 [Spodoptera litura]	XP_022826060.1	79.02	348	31	2	1	306	490	837	0	565
maker-tulip_contig_407_pilon_pilon-augustus-gene-7.95-mRNA-1	XP_021182782.1 methionine-R-sulfoxide reductase B1 isoform X2 [Helicoverpa armigera]	XP_021182782.1	96.67	120	4	0	1	120	1	120	6e-83	250
maker-tulip_contig_407_pilon_pilon-augustus-gene-7.96-mRNA-1	XP_021182791.1 methionine-R-sulfoxide reductase B1 isoform X3 [Helicoverpa armigera]	XP_021182791.1	100	47	0	0	64	110	97	143	3e-25	101
maker-tulip_contig_407_pilon_pilon-augustus-gene-7.97-mRNA-1	XP_022820256.1 GRIP and coiled-coil domain-containing protein 2 isoform X1 [Spodoptera litura]	XP_022820256.1	92.01	1314	105	0	1	1314	1	1314	0	2377
maker-tulip_contig_407_pilon_pilon-augustus-gene-7.99-mRNA-1	XP_026726176.1 elongation factor 1-alpha 2 [Trichoplusia ni]	XP_026726176.1	99.57	462	2	0	1	462	1	462	0	946
augustus_masked-tulip_contig_407_pilon_pilon-processed-gene-7.26-mRNA-1	XP_022821069.1 glutamine--fructose-6-phosphate aminotransferase [isomerizing] 1-like [Spodoptera litura]	XP_022821069.1	99.26	674	5	0	1	674	1	674	0	1395
maker-tulip_contig_407_pilon_pilon-augustus-gene-7.101-mRNA-1	XP_022824140.1 nuclear cap-binding protein subunit 2 [Spodoptera litura]	XP_022824140.1	99.38	161	1	0	1	161	1	161	1e-113	329
maker-tulip_contig_407_pilon_pilon-augustus-gene-7.103-mRNA-1	XP_022824059.1 gamma-tubulin complex component 3 homolog [Spodoptera litura]	XP_022824059.1	87.17	834	33	5	1	767	1	827	0	1358
maker-tulip_contig_407_pilon_pilon-augustus-gene-7.107-mRNA-1	XP_021196698.1 F-box-like/WD repeat-containing protein TBL1XR1 [Helicoverpa armigera]	XP_021196698.1	99.61	507	2	0	1	507	1	507	0	1050
maker-tulip_contig_407_pilon_pilon-augustus-gene-7.109-mRNA-1	XP_021201415.1 uncharacterized protein LOC110384448 [Helicoverpa armigera]	XP_021201415.1	48.38	587	255	16	1	559	134	700	9e-164	493
augustus_masked-tulip_contig_407_pilon_pilon-processed-gene-7.30-mRNA-1	XP_022826378.1 glutamate--cysteine ligase catalytic subunit isoform X1 [Spodoptera litura]	XP_022826378.1	95.05	667	16	2	1	650	1	667	0	1317
augustus_masked-tulip_contig_407_pilon_pilon-processed-gene-7.32-mRNA-1	XP_022822619.1 protein ECT2 isoform X5 [Spodoptera litura]	XP_022822619.1	89.68	1396	65	9	1	1326	1	1387	0	2451
maker-tulip_contig_407_pilon_pilon-augustus-gene-7.121-mRNA-1	XP_022822661.1 transport and Golgi organization protein 11 [Spodoptera litura]	XP_022822661.1	99.56	226	1	0	1	226	1	226	7e-166	467
maker-tulip_contig_407_pilon_pilon-augustus-gene-7.124-mRNA-1	RVE50988.1 hypothetical protein evm_004397 [Chilo suppressalis]	RVE50988.1	82.48	314	50	2	7	320	85	393	5e-163	473
augustus_masked-tulip_contig_407_pilon_pilon-processed-gene-7.35-mRNA-1	XP_022818739.1 uncharacterized protein LOC111351170 [Spodoptera litura]	XP_022818739.1	96.51	344	12	0	1	344	1	344	0	691
augustus_masked-tulip_contig_407_pilon_pilon-processed-gene-7.36-mRNA-1	XP_022823284.1 transcription initiation factor TFIID subunit 6 isoform X2 [Spodoptera litura]	XP_022823284.1	88.39	620	25	4	1	584	1	609	0	1030
maker-tulip_contig_407_pilon_pilon-augustus-gene-7.130-mRNA-1	XP_022828260.1 uncharacterized protein LOC111357690 [Spodoptera litura]	XP_022828260.1	88.55	227	26	0	1	227	1	227	2e-147	420
maker-tulip_contig_407_pilon_pilon-augustus-gene-7.131-mRNA-1	XP_022820937.1 serine/threonine-protein kinase PAK 3 isoform X1 [Spodoptera litura]	XP_022820937.1	81.98	616	14	4	1	559	1	576	0	984
maker-tulip_contig_407_pilon_pilon-augustus-gene-7.87-mRNA-1	XP_022826060.1 uncharacterized protein LOC111356065 [Spodoptera litura]	XP_022826060.1	72.5	80	16	3	43	122	3	76	3e-25	108
augustus_masked-tulip_contig_407_pilon_pilon-processed-gene-8.0-mRNA-1	PZC87169.1 hypothetical protein B5X24_HaOG201405 [Helicoverpa armigera]	PZC87169.1	97.95	390	8	0	2	391	3	392	0	760
maker-tulip_contig_407_pilon_pilon-augustus-gene-8.30-mRNA-1	XP_022827528.1 E3 ubiquitin-protein ligase UBR5 isoform X2 [Spodoptera litura]	XP_022827528.1	91.97	2877	72	13	27	2766	21	2875	0	5293
maker-tulip_contig_407_pilon_pilon-augustus-gene-8.35-mRNA-1	XP_022826074.1 uncharacterized protein LOC111356072 [Spodoptera litura]	XP_022826074.1	75.23	218	54	0	27	244	3	220	1e-117	345
maker-tulip_contig_407_pilon_pilon-augustus-gene-8.38-mRNA-1	XP_022823168.1 uncharacterized protein LOC111354110 [Spodoptera litura]	XP_022823168.1	89.42	274	29	0	1	274	1	274	2e-174	492
maker-tulip_contig_407_pilon_pilon-augustus-gene-8.41-mRNA-1	XP_022826111.1 cyclin-C [Spodoptera litura]	XP_022826111.1	99.25	268	2	0	1	268	1	268	0	554
maker-tulip_contig_407_pilon_pilon-augustus-gene-8.43-mRNA-1	XP_022825057.1 uncharacterized protein LOC111355413 [Spodoptera litura]	XP_022825057.1	92.41	158	12	0	1	158	1	158	2e-99	293
maker-tulip_contig_407_pilon_pilon-augustus-gene-8.45-mRNA-1	XP_022819812.1 COP9 signalosome complex subunit 6 [Spodoptera litura]	XP_022819812.1	100	342	0	0	1	342	1	342	0	708
augustus_masked-tulip_contig_407_pilon_pilon-processed-gene-8.8-mRNA-1	XP_022819823.1 GTP:AMP phosphotransferase AK3, mitochondrial [Spodoptera litura]	XP_022819823.1	98.61	216	3	0	1	216	1	216	3e-149	424
maker-tulip_contig_407_pilon_pilon-augustus-gene-8.51-mRNA-1	XP_022824565.1 uncharacterized protein LOC111355070 [Spodoptera litura]	XP_022824565.1	96.3	81	3	0	1	81	1	81	8e-50	167
maker-tulip_contig_407_pilon_pilon-augustus-gene-8.52-mRNA-1	XP_021183325.1 uncharacterized protein LOC110371415 isoform X1 [Helicoverpa armigera]	XP_021183325.1	87.5	248	29	1	1	248	1	246	1e-161	458
maker-tulip_contig_407_pilon_pilon-augustus-gene-8.48-mRNA-1	XP_022826123.1 uncharacterized protein LOC111356106 [Spodoptera litura]	XP_022826123.1	94.3	263	15	0	1	263	42	304	0	532
maker-tulip_contig_407_pilon_pilon-augustus-gene-8.49-mRNA-1	XP_022821519.1 uncharacterized protein LOC111352987 [Spodoptera litura]	XP_022821519.1	92.63	190	12	1	1	188	1	190	4e-109	327
augustus_masked-tulip_contig_407_pilon_pilon-processed-gene-8.12-mRNA-1	PZC87188.1 hypothetical protein B5X24_HaOG201424 [Helicoverpa armigera]	PZC87188.1	61.32	106	38	2	1	104	1	105	1e-37	137
maker-tulip_contig_407_pilon_pilon-augustus-gene-8.50-mRNA-1	XP_022821519.1 uncharacterized protein LOC111352987 [Spodoptera litura]	XP_022821519.1	94.39	107	6	0	6	112	247	353	9e-66	212
augustus_masked-tulip_contig_407_pilon_pilon-processed-gene-8.13-mRNA-1	XP_022820162.1 ommochrome-binding protein-like [Spodoptera litura]	XP_022820162.1	86.01	286	40	0	1	286	9	294	0	523
maker-tulip_contig_407_pilon_pilon-augustus-gene-8.71-mRNA-1	KOB73749.1 Armadillo repeat-containing protein 7 [Operophtera brumata]	KOB73749.1	64.64	280	37	5	1	218	1	280	2e-111	331
maker-tulip_contig_407_pilon_pilon-augustus-gene-8.73-mRNA-1	XP_022825728.1 follicle cell protein 3C-1 [Spodoptera litura]	XP_022825728.1	95.27	169	8	0	1	169	1	169	8e-117	338
maker-tulip_contig_407_pilon_pilon-augustus-gene-8.75-mRNA-1	XP_022827921.1 protein tramtrack, beta isoform-like isoform X1 [Spodoptera litura]	XP_022827921.1	98.54	547	8	0	1	547	1	547	0	1128
augustus_masked-tulip_contig_407_pilon_pilon-processed-gene-8.17-mRNA-1	XP_022827947.1 protein tramtrack, alpha isoform-like isoform X2 [Spodoptera litura]	XP_022827947.1	98.14	215	4	0	11	225	285	499	2e-155	451
augustus_masked-tulip_contig_407_pilon_pilon-processed-gene-8.18-mRNA-1	XP_022827955.1 zinc finger and BTB domain-containing protein 37-like isoform X3 [Spodoptera litura]	XP_022827955.1	95.79	261	11	0	1	261	306	566	0	526
augustus_masked-tulip_contig_407_pilon_pilon-processed-gene-8.19-mRNA-1	XP_022820623.1 MRN complex-interacting protein [Spodoptera litura]	XP_022820623.1	74.24	264	61	5	1	260	1	261	6e-130	379
maker-tulip_contig_407_pilon_pilon-augustus-gene-8.81-mRNA-1	XP_022825625.1 uncharacterized protein LOC111355793 [Spodoptera litura]	XP_022825625.1	91.68	637	49	3	1	635	1	635	0	1125
augustus_masked-tulip_contig_407_pilon_pilon-processed-gene-8.21-mRNA-1	XP_022822357.1 lethal(2)neighbour of tid protein 2 [Spodoptera litura]	XP_022822357.1	94.95	495	25	0	1	495	1	495	0	948
maker-tulip_contig_407_pilon_pilon-augustus-gene-8.83-mRNA-1	XP_022828205.1 uncharacterized protein LOC111357655 [Spodoptera litura]	XP_022828205.1	57.94	252	96	2	1	242	1	252	3e-102	307
maker-tulip_contig_407_pilon_pilon-augustus-gene-8.86-mRNA-1	XP_022828569.1 uncharacterized protein LOC111357969 isoform X1 [Spodoptera litura]	XP_022828569.1	66.67	138	45	1	1	138	1	137	3e-60	196
maker-tulip_contig_407_pilon_pilon-augustus-gene-8.88-mRNA-1	XP_022821493.1 zinc finger CCCH domain-containing protein 13 [Spodoptera litura]	XP_022821493.1	84.6	630	48	3	1	581	1	630	0	912
augustus_masked-tulip_contig_407_pilon_pilon-processed-gene-8.24-mRNA-1	XP_022821505.1 phosphatidate cytidylyltransferase, mitochondrial [Spodoptera litura]	XP_022821505.1	96.45	338	12	0	1	338	1	338	0	692
maker-tulip_contig_407_pilon_pilon-augustus-gene-8.90-mRNA-1	XP_026726214.1 uncharacterized protein LOC113492759 isoform X5 [Trichoplusia ni]	XP_026726214.1	98.21	112	2	0	1	112	688	799	1e-70	234
maker-tulip_contig_407_pilon_pilon-augustus-gene-8.91-mRNA-1	XP_022819773.1 uncharacterized protein LOC111351833 isoform X1 [Spodoptera litura]	XP_022819773.1	88.24	374	9	2	188	526	413	786	0	648
maker-tulip_contig_407_pilon_pilon-augustus-gene-8.94-mRNA-1	XP_022820150.1 MFS-type transporter SLC18B1-like [Spodoptera litura]	XP_022820150.1	89.75	771	15	3	1	708	1	770	0	1395
augustus_masked-tulip_contig_407_pilon_pilon-processed-gene-8.28-mRNA-1	XP_022826159.1 eukaryotic translation initiation factor 2A [Spodoptera litura]	XP_022826159.1	68.96	422	22	4	1	313	1	422	0	560
maker-tulip_contig_407_pilon_pilon-augustus-gene-8.106-mRNA-1	XP_022820614.1 extracellular sulfatase SULF-1 homolog [Spodoptera litura]	XP_022820614.1	94.81	983	47	1	7	985	375	1357	0	1854
augustus_masked-tulip_contig_407_pilon_pilon-processed-gene-9.0-mRNA-1	XP_022819369.1 uncharacterized protein LOC111351582 isoform X4 [Spodoptera litura]	XP_022819369.1	65.45	356	79	5	308	624	515	865	6e-127	417
maker-tulip_contig_407_pilon_pilon-augustus-gene-9.42-mRNA-1	XP_022825396.1 transcription factor E2F7-like [Spodoptera litura]	XP_022825396.1	98.51	336	5	0	1	336	1	336	0	682
augustus_masked-tulip_contig_407_pilon_pilon-processed-gene-9.2-mRNA-1	XP_022826182.1 RNMT-activating mini protein [Spodoptera litura]	XP_022826182.1	90	110	10	1	1	109	1	110	2e-54	174
augustus_masked-tulip_contig_407_pilon_pilon-processed-gene-9.3-mRNA-1	XP_022824697.1 ankyrin repeat domain-containing protein 13C [Spodoptera litura]	XP_022824697.1	99.32	443	3	0	1	443	1	443	0	908
maker-tulip_contig_407_pilon_pilon-augustus-gene-9.43-mRNA-1	XP_022823757.1 zinc finger protein 2 isoform X1 [Spodoptera litura]	XP_022823757.1	81.08	555	60	2	1	511	1	554	0	904
augustus_masked-tulip_contig_407_pilon_pilon-processed-gene-9.5-mRNA-1	XP_021181227.1 LOW QUALITY PROTEIN: E3 ubiquitin-protein ligase TRIP12 [Helicoverpa armigera]	XP_021181227.1	78.4	1088	140	14	411	1443	498	1545	0	1430
augustus_masked-tulip_contig_407_pilon_pilon-processed-gene-9.6-mRNA-1	XP_026726265.1 GTPase-activating protein [Trichoplusia ni]	XP_026726265.1	78.83	789	104	8	501	1287	631	1358	0	1126
augustus_masked-tulip_contig_407_pilon_pilon-processed-gene-9.7-mRNA-1	XP_022820593.1 serine/arginine repetitive matrix protein 2-like [Spodoptera litura]	XP_022820593.1	95.29	382	18	0	1	382	7	388	2e-155	453
augustus_masked-tulip_contig_407_pilon_pilon-processed-gene-9.8-mRNA-1	XP_022820583.1 uncharacterized protein LOC111352339 [Spodoptera litura]	XP_022820583.1	96.91	713	21	1	1	712	1	713	0	1437
maker-tulip_contig_407_pilon_pilon-augustus-gene-9.67-mRNA-1	XP_022828594.1 peptidyl-prolyl cis-trans isomerase NIMA-interacting 4 [Spodoptera litura]	XP_022828594.1	98.51	134	2	0	1	134	1	134	3e-90	268
maker-tulip_contig_407_pilon_pilon-augustus-gene-9.69-mRNA-1	XP_022822890.1 SPRY domain-containing protein 7 [Spodoptera litura]	XP_022822890.1	97.88	189	4	0	1	189	1	189	3e-136	391
maker-tulip_contig_407_pilon_pilon-augustus-gene-9.71-mRNA-1	XP_022824706.1 uncharacterized protein LOC111355173 [Spodoptera litura]	XP_022824706.1	85.56	540	77	1	1	540	1	539	0	975
augustus_masked-tulip_contig_407_pilon_pilon-processed-gene-9.12-mRNA-1	XP_026726284.1 uncharacterized protein LOC113492805 [Trichoplusia ni]	XP_026726284.1	48.63	1096	513	14	1	1074	3	1070	0	1065
maker-tulip_contig_407_pilon_pilon-augustus-gene-9.74-mRNA-1	XP_022828849.1 juvenile hormone esterase-like [Spodoptera litura]	XP_022828849.1	84.78	578	80	2	1	570	1	578	0	1016
maker-tulip_contig_407_pilon_pilon-augustus-gene-9.75-mRNA-1	XP_022826306.1 cholinesterase 1-like [Spodoptera litura]	XP_022826306.1	86.53	527	71	0	2	528	15	541	0	966
maker-tulip_contig_407_pilon_pilon-augustus-gene-9.76-mRNA-1	XP_022824677.1 uncharacterized protein LOC111355150 [Spodoptera litura]	XP_022824677.1	90	570	57	0	1	570	1	570	0	1084
augustus_masked-tulip_contig_407_pilon_pilon-processed-gene-9.16-mRNA-1	XP_022826505.1 juvenile hormone esterase-like [Spodoptera litura]	XP_022826505.1	83.91	553	66	1	1	530	1	553	0	963
maker-tulip_contig_407_pilon_pilon-augustus-gene-9.78-mRNA-1	ACV60241.1 antennal esterase CXE14 [Spodoptera littoralis]	ACV60241.1	88.53	497	57	0	11	507	61	557	0	911
augustus_masked-tulip_contig_407_pilon_pilon-processed-gene-9.18-mRNA-1	XP_022819009.1 uncharacterized protein LOC111351337 [Spodoptera litura]	XP_022819009.1	40.45	220	130	1	16	234	33	252	3e-53	191
maker-tulip_contig_407_pilon_pilon-augustus-gene-9.151-mRNA-1	XP_022819329.1 uncharacterized protein LOC111351575 [Spodoptera litura]	XP_022819329.1	81.95	1546	248	12	1	1524	1	1537	0	2369
maker-tulip_contig_407_pilon_pilon-augustus-gene-9.153-mRNA-1	XP_022825416.1 prenylated Rab acceptor protein 1 isoform X2 [Spodoptera litura]	XP_022825416.1	97.47	198	5	0	1	198	1	198	6e-142	404
maker-tulip_contig_407_pilon_pilon-augustus-gene-9.156-mRNA-1	XP_022824962.1 TLD domain-containing protein 2 isoform X14 [Spodoptera litura]	XP_022824962.1	85.38	260	10	1	1	232	2	261	5e-161	456
maker-tulip_contig_407_pilon_pilon-augustus-gene-9.157-mRNA-1	XP_022824972.1 oxidation resistance protein 1 isoform X15 [Spodoptera litura]	XP_022824972.1	73.44	241	14	2	8	198	708	948	5e-103	331
maker-tulip_contig_407_pilon_pilon-augustus-gene-9.158-mRNA-1	XP_022824925.1 oxidation resistance protein 1 isoform X9 [Spodoptera litura]	XP_022824925.1	81.15	626	54	8	6	591	11	612	0	991
augustus_masked-tulip_contig_407_pilon_pilon-processed-gene-9.26-mRNA-1	PCG77121.1 hypothetical protein B5V51_8059 [Heliothis virescens]	PCG77121.1	91.85	184	13	1	1	182	1	184	3e-116	338
maker-tulip_contig_407_pilon_pilon-augustus-gene-9.168-mRNA-1	XP_022820634.1 coiled-coil domain-containing protein 39 [Spodoptera litura]	XP_022820634.1	80.45	179	35	0	1	179	733	911	1e-94	305
maker-tulip_contig_407_pilon_pilon-augustus-gene-9.169-mRNA-1	XP_022820634.1 coiled-coil domain-containing protein 39 [Spodoptera litura]	XP_022820634.1	91.74	678	56	0	1	678	1	678	0	1279
maker-tulip_contig_407_pilon_pilon-augustus-gene-9.180-mRNA-1	XP_022824658.1 transmembrane protein 256-like isoform X1 [Spodoptera litura]	XP_022824658.1	96.93	163	5	0	1	163	1	163	3e-113	328
maker-tulip_contig_407_pilon_pilon-augustus-gene-9.181-mRNA-1	XP_022820411.1 inter-alpha-trypsin inhibitor heavy chain H4-like isoform X2 [Spodoptera litura]	XP_022820411.1	81.51	1022	82	5	1	978	1	959	0	1630
augustus_masked-tulip_contig_407_pilon_pilon-processed-gene-9.32-mRNA-1	XP_021200247.1 probable histone-lysine N-methyltransferase set-23 [Helicoverpa armigera]	XP_021200247.1	65.4	263	89	2	1	261	1	263	2e-121	357
augustus_masked-tulip_contig_407_pilon_pilon-processed-gene-9.33-mRNA-1	XP_022820602.1 protein cereblon-like [Spodoptera litura]	XP_022820602.1	97.16	141	3	1	10	150	34	173	9e-99	291
maker-tulip_contig_407_pilon_pilon-augustus-gene-9.187-mRNA-1	XP_022828699.1 twinkle protein, mitochondrial [Spodoptera litura]	XP_022828699.1	86.01	343	8	2	23	325	1	343	0	598
maker-tulip_contig_407_pilon_pilon-augustus-gene-9.189-mRNA-1	XP_021187474.1 mediator of RNA polymerase II transcription subunit 12-like isoform X3 [Helicoverpa armigera]	XP_021187474.1	85.39	1020	84	11	1	969	1407	2412	0	1701
maker-tulip_contig_407_pilon_pilon-augustus-gene-9.191-mRNA-1	XP_022818940.1 mediator of RNA polymerase II transcription subunit 12-like isoform X1 [Spodoptera litura]	XP_022818940.1	97.57	987	15	1	1	978	1	987	0	1930
maker-tulip_contig_407_pilon_pilon-augustus-gene-9.201-mRNA-1	AQX37242.1 LL7 [Spodoptera exigua]	AQX37242.1	100	217	0	0	1	217	1	217	1e-161	455
augustus_masked-tulip_contig_407_pilon_pilon-processed-gene-9.39-mRNA-1	AMO44417.1 carboxylesterase [Helicoverpa armigera]	AMO44417.1	66.67	528	163	5	14	529	14	540	0	741
maker-tulip_contig_564_pilon_pilon-augustus-gene-0.0-mRNA-1	XP_022824258.1 26S proteasome non-ATPase regulatory subunit 13-like isoform X2 [Spodoptera litura]	XP_022824258.1	85.55	346	11	2	1	307	1	346	0	589
augustus_masked-tulip_contig_564_pilon_pilon-processed-gene-0.7-mRNA-1	XP_022824125.1 uncharacterized protein LOC111354778 isoform X1 [Spodoptera litura]	XP_022824125.1	79.75	1269	120	19	142	1294	554	1801	0	1872
augustus_masked-tulip_contig_624_pilon_pilon-processed-gene-0.0-mRNA-1	BAM78680.1 glucosidase II alpha-subunit [Spodoptera frugiperda]	BAM78680.1	69.68	221	41	3	1	195	707	927	8e-92	296
maker-tulip_contig_624_pilon_pilon-augustus-gene-0.3-mRNA-1	XP_022828470.1 putative zinc finger protein 286B [Spodoptera litura]	XP_022828470.1	66.67	312	87	5	1	299	1	308	2e-139	413
maker-tulip_contig_624_pilon_pilon-augustus-gene-0.5-mRNA-1	XP_022828738.1 zinc finger protein 271-like [Spodoptera litura]	XP_022828738.1	86.06	796	79	5	1	768	1	792	0	1356
maker-tulip_contig_619_pilon_pilon-augustus-gene-0.20-mRNA-1	XP_022828761.1 uncharacterized protein LOC111358093 [Spodoptera litura]	XP_022828761.1	62.07	87	33	0	27	113	1	87	8e-31	118
maker-tulip_contig_619_pilon_pilon-augustus-gene-0.22-mRNA-1	XP_022828719.1 uncharacterized protein LOC111358069 isoform X1 [Spodoptera litura]	XP_022828719.1	56.6	106	43	2	1	105	121	224	2e-23	101
maker-tulip_contig_619_pilon_pilon-augustus-gene-0.24-mRNA-1	XP_022828482.1 probable cyclin-dependent serine/threonine-protein kinase DDB_G0292550 [Spodoptera litura]	XP_022828482.1	42.68	164	44	6	485	612	571	720	9e-17	91.7
maker-tulip_contig_619_pilon_pilon-augustus-gene-0.27-mRNA-1	XP_022828483.1 proton-coupled amino acid transporter-like protein pathetic [Spodoptera litura]	XP_022828483.1	57.51	626	168	11	1	548	1	606	0	644
maker-tulip_contig_619_pilon_pilon-augustus-gene-0.29-mRNA-1	XP_022828484.1 proton-coupled amino acid transporter-like protein pathetic [Spodoptera litura]	XP_022828484.1	77.58	281	16	1	1	234	1	281	1e-139	408
maker-tulip_contig_619_pilon_pilon-augustus-gene-0.30-mRNA-1	XP_022828484.1 proton-coupled amino acid transporter-like protein pathetic [Spodoptera litura]	XP_022828484.1	94	50	3	0	92	141	368	417	8e-22	97.1
maker-tulip_contig_619_pilon_pilon-augustus-gene-0.31-mRNA-1	XP_022828730.1 proton-coupled amino acid transporter-like protein CG1139 [Spodoptera litura]	XP_022828730.1	73.48	132	35	0	5	136	134	265	2e-60	205
maker-tulip_contig_619_pilon_pilon-augustus-gene-0.35-mRNA-1	XP_022828731.1 homeobox protein 5-like isoform X1 [Spodoptera litura]	XP_022828731.1	67.25	400	112	5	12	392	15	414	0	520
maker-tulip_contig_619_pilon_pilon-augustus-gene-0.36-mRNA-1	XP_022828694.1 zinc finger matrin-type protein 5 [Spodoptera litura]	XP_022828694.1	80.35	173	11	1	1	150	1	173	6e-97	286
augustus_masked-tulip_contig_619_pilon_pilon-processed-gene-0.10-mRNA-1	XP_022828789.1 uncharacterized protein LOC111358112 isoform X2 [Spodoptera litura]	XP_022828789.1	58.15	227	95	0	222	448	4	230	1e-78	254
augustus_masked-tulip_contig_619_pilon_pilon-processed-gene-0.11-mRNA-1	XP_022828589.1 uncharacterized protein LOC111357974 isoform X4 [Spodoptera litura]	XP_022828589.1	98.04	509	10	0	1	509	1	509	0	1042
maker-tulip_contig_619_pilon_pilon-augustus-gene-0.43-mRNA-1	XP_022828588.1 uncharacterized protein LOC111357974 isoform X3 [Spodoptera litura]	XP_022828588.1	77.18	206	27	3	6	197	734	933	2e-95	306
augustus_masked-tulip_contig_619_pilon_pilon-processed-gene-0.13-mRNA-1	XP_022828101.1 histidine-rich glycoprotein-like [Spodoptera litura]	XP_022828101.1	97.67	43	1	0	1	43	1	43	3e-09	57
maker-tulip_contig_619_pilon_pilon-augustus-gene-0.46-mRNA-1	KOB65768.1 putative transposon Ty3-I Gag-Pol polyprotein [Operophtera brumata]	KOB65768.1	45.69	197	100	3	4	199	580	770	2e-44	166
augustus_masked-tulip_contig_619_pilon_pilon-processed-gene-0.16-mRNA-1	PCG69827.1 hypothetical protein B5V51_3628 [Heliothis virescens]	PCG69827.1	42.62	420	201	9	64	459	77	480	1e-96	309
maker-tulip_contig_619_pilon_pilon-augustus-gene-0.47-mRNA-1	XP_022828730.1 proton-coupled amino acid transporter-like protein CG1139 [Spodoptera litura]	XP_022828730.1	82.23	242	43	0	26	267	44	285	9e-140	412
augustus_masked-tulip_contig_619_pilon_pilon-processed-gene-1.40-mRNA-1	ALL55467.1 ryanodine receptor [Spodoptera exigua]	ALL55467.1	99.66	2062	7	0	1	2062	22	2083	0	4342
maker-tulip_contig_619_pilon_pilon-augustus-gene-1.4-mRNA-1	ALL55473.1 ryanodine receptor [Spodoptera exigua]	ALL55473.1	81.8	654	23	4	2	559	3314	3967	0	970
maker-tulip_contig_619_pilon_pilon-augustus-gene-1.31-mRNA-1	XP_026762362.1 uncharacterized protein LOC113521129, partial [Galleria mellonella]	XP_026762362.1	63.04	349	128	1	133	480	545	893	2e-147	469
augustus_masked-tulip_contig_619_pilon_pilon-processed-gene-1.44-mRNA-1	XP_022828688.1 uncharacterized protein LOC111358037 [Spodoptera litura]	XP_022828688.1	75.14	354	88	0	22	375	22	375	0	593
augustus_masked-tulip_contig_619_pilon_pilon-processed-gene-1.45-mRNA-1	PZC70378.1 hypothetical protein B5X24_HaOG217181 [Helicoverpa armigera]	PZC70378.1	60.42	96	34	2	7	99	8	102	2e-27	106
maker-tulip_contig_619_pilon_pilon-augustus-gene-1.33-mRNA-1	XP_022828811.1 uncharacterized protein LOC111358126 [Spodoptera litura]	XP_022828811.1	65.52	87	30	0	526	612	113	199	4e-29	123
augustus_masked-tulip_contig_619_pilon_pilon-processed-gene-1.49-mRNA-1	PCG71129.1 hypothetical protein B5V51_2208, partial [Heliothis virescens]	PCG71129.1	79.69	128	26	0	1	128	60	187	5e-54	183
maker-tulip_contig_619_pilon_pilon-augustus-gene-1.35-mRNA-1	XP_022828644.1 Golgi pH regulator [Spodoptera litura]	XP_022828644.1	98.44	257	4	0	1	257	1	257	8e-179	516
augustus_masked-tulip_contig_619_pilon_pilon-processed-gene-1.51-mRNA-1	XP_022828800.1 zinc finger protein 41-like [Spodoptera litura]	XP_022828800.1	86.22	479	60	2	1	473	78	556	0	862
augustus_masked-tulip_contig_619_pilon_pilon-processed-gene-1.52-mRNA-1	PCG69590.1 hypothetical protein B5V51_3935, partial [Heliothis virescens]	PCG69590.1	75.26	194	45	1	1	194	189	379	3e-95	293
augustus_masked-tulip_contig_619_pilon_pilon-processed-gene-2.2-mRNA-1	KOB72988.1 Uncharacterized protein OBRU01_11452 [Operophtera brumata]	KOB72988.1	83.33	114	19	0	1	114	115	228	2e-62	204
augustus_masked-tulip_contig_619_pilon_pilon-processed-gene-2.3-mRNA-1	KOB72988.1 Uncharacterized protein OBRU01_11452 [Operophtera brumata]	KOB72988.1	70.06	157	43	1	1	157	252	404	4e-75	239
augustus_masked-tulip_contig_619_pilon_pilon-processed-gene-2.4-mRNA-1	PZC78213.1 hypothetical protein B5X24_HaOG202464 [Helicoverpa armigera]	PZC78213.1	90.14	355	35	0	1	355	98	452	0	654
augustus_masked-tulip_contig_619_pilon_pilon-processed-gene-2.5-mRNA-1	PCG63543.1 hypothetical protein B5V51_12121 [Heliothis virescens]	PCG63543.1	84.86	350	53	0	4	353	1	350	0	645
augustus_masked-tulip_contig_619_pilon_pilon-processed-gene-2.6-mRNA-1	PCG73264.1 hypothetical protein B5V51_14987 [Heliothis virescens]	PCG73264.1	77.49	231	52	0	2	232	245	475	6e-109	339
augustus_masked-tulip_contig_619_pilon_pilon-processed-gene-2.7-mRNA-1	XP_014360043.1 PREDICTED: uncharacterized protein LOC106712108 [Papilio machaon]	XP_014360043.1	42.86	518	262	4	41	527	1	515	5e-125	396
augustus_masked-tulip_contig_283_pilon_pilon-processed-gene-0.4-mRNA-1	XP_012552749.1 proteoglycan Cow [Bombyx mori]	XP_012552749.1	40.1	207	65	4	1	200	291	445	9e-29	119
augustus_masked-tulip_contig_283_pilon_pilon-processed-gene-0.5-mRNA-1	RVE54047.1 hypothetical protein evm_001170 [Chilo suppressalis]	RVE54047.1	68.34	499	113	10	1	493	1	460	1e-166	489
augustus_masked-tulip_contig_283_pilon_pilon-processed-gene-0.8-mRNA-1	XP_022825443.1 tensin-like isoform X2 [Spodoptera litura]	XP_022825443.1	89.53	86	9	0	3	88	31	116	8e-38	139
maker-tulip_contig_283_pilon_pilon-augustus-gene-0.1-mRNA-1	XP_026737528.1 uncharacterized protein LOC113500832 [Trichoplusia ni]	XP_026737528.1	72.19	302	23	4	14	254	241	542	5e-122	372
maker-tulip_contig_283_pilon_pilon-augustus-gene-0.3-mRNA-1	XP_022824611.1 uncharacterized protein LOC111355114 [Spodoptera litura]	XP_022824611.1	86.24	189	26	0	5	193	255	443	2e-105	342
maker-tulip_contig_283_pilon_pilon-augustus-gene-1.6-mRNA-1	XP_022825652.1 protein amalgam-like [Spodoptera litura]	XP_022825652.1	86.79	280	3	1	1	246	112	391	6e-175	499
augustus_masked-tulip_contig_283_pilon_pilon-processed-gene-1.3-mRNA-1	PZC75149.1 hypothetical protein B5X24_HaOG206711 [Helicoverpa armigera]	PZC75149.1	58.26	539	202	6	196	726	517	1040	0	620
maker-tulip_contig_283_pilon_pilon-augustus-gene-1.9-mRNA-1	XP_026726774.1 uncharacterized protein LOC113493150 [Trichoplusia ni]	XP_026726774.1	41.46	123	53	8	3	113	418	533	2e-08	61.6
augustus_masked-tulip_contig_283_pilon_pilon-processed-gene-1.1-mRNA-1	XP_026726774.1 uncharacterized protein LOC113493150 [Trichoplusia ni]	XP_026726774.1	63.48	397	131	5	1	393	1	387	5e-169	494
maker-tulip_contig_283_pilon_pilon-augustus-gene-1.11-mRNA-1	XP_022825583.1 delta(7)-sterol 5(6)-desaturase erg32-like [Spodoptera litura]	XP_022825583.1	94.16	411	24	0	1	411	1	411	0	788
maker-tulip_contig_283_pilon_pilon-augustus-gene-2.9-mRNA-1	XP_022825357.1 zinc finger protein Elbow [Spodoptera litura]	XP_022825357.1	99.52	419	2	0	1	419	1	419	0	823
augustus_masked-tulip_contig_283_pilon_pilon-processed-gene-2.2-mRNA-1	XP_022825410.1 zinc finger protein Noc isoform X2 [Spodoptera litura]	XP_022825410.1	99.55	449	2	0	1	449	1	449	0	906
maker-tulip_contig_283_pilon_pilon-augustus-gene-2.11-mRNA-1	PZC79890.1 hypothetical protein B5X24_HaOG215654 [Helicoverpa armigera]	PZC79890.1	47.95	488	211	6	118	570	1253	1732	5e-139	454
maker-tulip_contig_283_pilon_pilon-augustus-gene-2.12-mRNA-1	XP_011563990.1 PREDICTED: uncharacterized protein LOC105393840 [Plutella xylostella]	XP_011563990.1	57.99	369	150	4	286	651	1006	1372	3e-140	459
maker-tulip_contig_283_pilon_pilon-augustus-gene-2.13-mRNA-1	XP_021194638.1 solute carrier family 22 member 13-like [Helicoverpa armigera]	XP_021194638.1	81.55	515	89	2	1	515	1	509	0	862
maker-tulip_contig_283_pilon_pilon-augustus-gene-2.16-mRNA-1	XP_022825599.1 pickpocket protein 28 [Spodoptera litura]	XP_022825599.1	75.91	465	73	1	106	531	1	465	0	694
maker-tulip_contig_283_pilon_pilon-augustus-gene-3.0-mRNA-1	XP_022825455.1 IQ and AAA domain-containing protein 1-like [Spodoptera litura]	XP_022825455.1	71.88	640	127	6	1	588	243	881	0	903
maker-tulip_contig_283_pilon_pilon-augustus-gene-3.3-mRNA-1	XP_022825212.1 myc box-dependent-interacting protein 1 isoform X1 [Spodoptera litura]	XP_022825212.1	85.03	461	41	4	6	439	23	482	0	757
augustus_masked-tulip_contig_283_pilon_pilon-processed-gene-3.18-mRNA-1	XP_022825050.1 fatty-acid amide hydrolase 2-B-like isoform X2 [Spodoptera litura]	XP_022825050.1	92.2	205	8	2	1	198	1	204	2e-122	374
augustus_masked-tulip_contig_283_pilon_pilon-processed-gene-3.19-mRNA-1	XP_022825038.1 inner nuclear membrane protein Man1-like [Spodoptera litura]	XP_022825038.1	96.42	783	26	2	1	782	1	782	0	1554
augustus_masked-tulip_contig_283_pilon_pilon-processed-gene-3.20-mRNA-1	XP_026737385.1 uncharacterized protein LOC113500707 isoform X1 [Trichoplusia ni]	XP_026737385.1	95.04	121	6	0	1	121	2	122	5e-78	237
maker-tulip_contig_283_pilon_pilon-augustus-gene-3.8-mRNA-1	XP_022825425.1 meiosis-specific nuclear structural protein 1-like [Spodoptera litura]	XP_022825425.1	54.89	501	94	6	1	372	1	498	2e-172	501
augustus_masked-tulip_contig_283_pilon_pilon-processed-gene-3.24-mRNA-1	XP_022825046.1 2-oxoisovalerate dehydrogenase subunit beta, mitochondrial [Spodoptera litura]	XP_022825046.1	83.52	176	19	2	111	276	193	368	4e-98	302
maker-tulip_contig_109_pilon_pilon-augustus-gene-0.0-mRNA-1	XP_022835178.1 uncharacterized protein LOC111362690 [Spodoptera litura]	XP_022835178.1	83.3	503	50	1	1	469	1	503	0	863
augustus_masked-tulip_contig_109_pilon_pilon-processed-gene-0.44-mRNA-1	XP_022819096.1 uncharacterized protein LOC111351405 isoform X2 [Spodoptera litura]	XP_022819096.1	58.17	416	133	7	1	381	85	494	1e-122	373
augustus_masked-tulip_contig_109_pilon_pilon-processed-gene-0.45-mRNA-1	XP_022819095.1 kielin/chordin-like protein isoform X1 [Spodoptera litura]	XP_022819095.1	57.74	336	121	10	1	329	52	373	2e-81	283
augustus_masked-tulip_contig_109_pilon_pilon-processed-gene-0.46-mRNA-1	XP_026331488.1 uncharacterized protein LOC113238860 [Hyposmocoma kahamanoa]	XP_026331488.1	38.6	456	231	11	9	458	12	424	8e-79	267
augustus_masked-tulip_contig_109_pilon_pilon-processed-gene-0.47-mRNA-1	XP_026735791.1 piggyBac transposable element-derived protein 4-like [Trichoplusia ni]	XP_026735791.1	65.69	102	33	1	1	100	140	241	2e-37	139
augustus_masked-tulip_contig_109_pilon_pilon-processed-gene-0.48-mRNA-1	XP_026735791.1 piggyBac transposable element-derived protein 4-like [Trichoplusia ni]	XP_026735791.1	42.06	126	67	3	2	121	325	450	7e-22	97.1
maker-tulip_contig_109_pilon_pilon-augustus-gene-0.2-mRNA-1	ABM66814.2 trehalose 6-phosphate synthase [Spodoptera exigua]	ABM66814.2	99.76	826	2	0	1	826	1	826	0	1719
maker-tulip_contig_109_pilon_pilon-augustus-gene-0.7-mRNA-1	XP_022814641.1 uncharacterized protein LOC111348306 isoform X1 [Spodoptera litura]	XP_022814641.1	98.09	471	9	0	1	471	1	471	0	928
maker-tulip_contig_109_pilon_pilon-augustus-gene-0.8-mRNA-1	XP_022814616.1 protein dpy-30 homolog [Spodoptera litura]	XP_022814616.1	90.43	115	11	0	1	115	1	115	2e-68	211
maker-tulip_contig_109_pilon_pilon-augustus-gene-0.10-mRNA-1	XP_022814734.1 pancreatic triacylglycerol lipase-like [Spodoptera litura]	XP_022814734.1	81.4	387	18	3	1	334	1	386	0	595
maker-tulip_contig_109_pilon_pilon-augustus-gene-0.12-mRNA-1	XP_022814934.1 uncharacterized protein LOC111348524 [Spodoptera litura]	XP_022814934.1	92.82	195	13	1	1	195	1	194	9e-132	378
augustus_masked-tulip_contig_109_pilon_pilon-processed-gene-0.56-mRNA-1	XP_022814747.1 VWFA and cache domain-containing protein CG16868 [Spodoptera litura]	XP_022814747.1	97.4	1193	31	0	1	1193	1	1193	0	2451
augustus_masked-tulip_contig_109_pilon_pilon-processed-gene-0.57-mRNA-1	XP_022835100.1 transcription elongation regulator 1 isoform X5 [Spodoptera litura]	XP_022835100.1	85.71	133	19	0	21	153	957	1089	4e-54	192
maker-tulip_contig_109_pilon_pilon-augustus-gene-0.14-mRNA-1	PCG79393.1 hypothetical protein B5V51_881 [Heliothis virescens]	PCG79393.1	87.2	125	15	1	11	134	745	869	7e-55	196
maker-tulip_contig_109_pilon_pilon-augustus-gene-0.16-mRNA-1	XP_022835098.1 transcription elongation regulator 1 isoform X3 [Spodoptera litura]	XP_022835098.1	50	102	12	3	1	63	235	336	2e-13	72
maker-tulip_contig_109_pilon_pilon-augustus-gene-0.18-mRNA-1	XP_022835097.1 transcription elongation regulator 1 isoform X2 [Spodoptera litura]	XP_022835097.1	94.47	235	12	1	1	235	1	234	2e-71	244
augustus_masked-tulip_contig_109_pilon_pilon-processed-gene-0.60-mRNA-1	PCG79396.1 hypothetical protein B5V51_884 [Heliothis virescens]	PCG79396.1	40.11	187	75	8	4	159	7	187	1e-14	76.3
augustus_masked-tulip_contig_109_pilon_pilon-processed-gene-0.62-mRNA-1	XP_022819040.1 dnaJ homolog subfamily B member 12 isoform X2 [Spodoptera litura]	XP_022819040.1	95.54	112	5	0	1	112	1	112	4e-70	223
maker-tulip_contig_109_pilon_pilon-augustus-gene-0.20-mRNA-1	XP_022814360.1 protein YIPF6 [Spodoptera litura]	XP_022814360.1	99.11	224	2	0	1	224	1	224	2e-161	455
maker-tulip_contig_109_pilon_pilon-augustus-gene-0.23-mRNA-1	XP_022814735.1 radial spoke head 1 homolog [Spodoptera litura]	XP_022814735.1	91.94	310	25	0	1	310	1	310	0	538
augustus_masked-tulip_contig_109_pilon_pilon-processed-gene-0.66-mRNA-1	XP_022814733.1 coiled-coil domain-containing protein 85C-B [Spodoptera litura]	XP_022814733.1	98.28	407	6	1	1	407	1	406	0	813
maker-tulip_contig_109_pilon_pilon-augustus-gene-0.24-mRNA-1	XP_022814958.1 RNA-binding protein 42 [Spodoptera litura]	XP_022814958.1	97.83	322	7	0	1	322	1	322	0	627
maker-tulip_contig_109_pilon_pilon-augustus-gene-0.27-mRNA-1	XP_022814933.1 transmembrane protein 136-like [Spodoptera litura]	XP_022814933.1	79.54	259	52	1	1	259	1	258	3e-152	435
maker-tulip_contig_109_pilon_pilon-augustus-gene-0.28-mRNA-1	XP_022815050.1 uncharacterized protein LOC111348616 [Spodoptera litura]	XP_022815050.1	88.08	411	46	2	36	443	778	1188	0	686
maker-tulip_contig_109_pilon_pilon-augustus-gene-0.29-mRNA-1	XP_022815050.1 uncharacterized protein LOC111348616 [Spodoptera litura]	XP_022815050.1	98.76	726	8	1	1	726	1	725	0	1475
maker-tulip_contig_109_pilon_pilon-augustus-gene-0.39-mRNA-1	XP_022814971.1 la-related protein 7 [Spodoptera litura]	XP_022814971.1	83.12	539	48	3	1	514	1	521	0	824
maker-tulip_contig_109_pilon_pilon-augustus-gene-0.6-mRNA-1	XP_022814643.1 anaphase-promoting complex subunit 11-like isoform X2 [Spodoptera litura]	XP_022814643.1	100	84	0	0	1	84	1	84	5e-55	174
maker-tulip_contig_109_pilon_pilon-augustus-gene-1.2-mRNA-1	XP_022814286.1 1-phosphatidylinositol 4,5-bisphosphate phosphodiesterase classes I and II isoform X2 [Spodoptera litura]	XP_022814286.1	78.18	614	29	6	1	509	1	614	0	934
maker-tulip_contig_109_pilon_pilon-augustus-gene-1.1-mRNA-1	XP_022814286.1 1-phosphatidylinositol 4,5-bisphosphate phosphodiesterase classes I and II isoform X2 [Spodoptera litura]	XP_022814286.1	61.9	441	87	6	14	411	613	1015	1e-146	478
maker-tulip_contig_109_pilon_pilon-augustus-gene-1.8-mRNA-1	PCG71101.1 hypothetical protein B5V51_2246 [Heliothis virescens]	PCG71101.1	77.16	416	69	4	1	390	1	416	0	649
maker-tulip_contig_109_pilon_pilon-augustus-gene-1.11-mRNA-1	XP_022814551.1 carotenoid isomerooxygenase [Spodoptera litura]	XP_022814551.1	86.25	509	19	1	1	458	1	509	0	899
maker-tulip_contig_109_pilon_pilon-augustus-gene-1.14-mRNA-1	XP_022814851.1 neuromedin-U receptor 1-like [Spodoptera litura]	XP_022814851.1	85.24	393	19	1	1	393	1	354	0	674
augustus_masked-tulip_contig_109_pilon_pilon-processed-gene-1.52-mRNA-1	PCG71106.1 hypothetical protein B5V51_2251, partial [Heliothis virescens]	PCG71106.1	96.49	114	4	0	1	114	1	114	7e-70	215
augustus_masked-tulip_contig_109_pilon_pilon-processed-gene-1.54-mRNA-1	XP_022814637.1 serine/threonine-protein phosphatase 6 regulatory ankyrin repeat subunit A [Spodoptera litura]	XP_022814637.1	99.62	1598	6	0	1	1598	118	1715	0	3305
maker-tulip_contig_109_pilon_pilon-augustus-gene-1.18-mRNA-1	XP_022814428.1 phospholipase A1-like [Spodoptera litura]	XP_022814428.1	56.15	130	29	1	88	189	1	130	3e-41	146
maker-tulip_contig_109_pilon_pilon-augustus-gene-1.21-mRNA-1	XP_022814428.1 phospholipase A1-like [Spodoptera litura]	XP_022814428.1	78.44	167	36	0	71	237	1	167	2e-90	277
maker-tulip_contig_109_pilon_pilon-augustus-gene-1.22-mRNA-1	XP_022814679.1 phospholipase A1-like [Spodoptera litura]	XP_022814679.1	76.19	189	45	0	1	189	154	342	3e-106	318
augustus_masked-tulip_contig_109_pilon_pilon-processed-gene-1.59-mRNA-1	XP_022814520.1 mediator of RNA polymerase II transcription subunit 17 [Spodoptera litura]	XP_022814520.1	99.69	643	2	0	1	643	1	643	0	1337
augustus_masked-tulip_contig_109_pilon_pilon-processed-gene-1.61-mRNA-1	XP_022815044.1 protein bark beetle isoform X2 [Spodoptera litura]	XP_022815044.1	97.24	2903	38	3	4	2864	122	3024	0	5856
maker-tulip_contig_109_pilon_pilon-augustus-gene-1.28-mRNA-1	XP_022815033.1 equilibrative nucleoside transporter 1 [Spodoptera litura]	XP_022815033.1	97.66	128	3	0	1	128	1	128	2e-83	259
maker-tulip_contig_109_pilon_pilon-augustus-gene-1.29-mRNA-1	XP_026732491.1 equilibrative nucleoside transporter 1 [Trichoplusia ni]	XP_026732491.1	83.75	277	33	1	7	271	179	455	3e-165	476
augustus_masked-tulip_contig_109_pilon_pilon-processed-gene-1.65-mRNA-1	XP_022814310.1 ATP-binding cassette sub-family G member 4-like isoform X2 [Spodoptera litura]	XP_022814310.1	73.27	404	16	4	4	315	84	487	0	560
maker-tulip_contig_109_pilon_pilon-augustus-gene-1.34-mRNA-1	XP_022814670.1 ATP-binding cassette sub-family G member 1-like [Spodoptera litura]	XP_022814670.1	77.94	281	9	2	1	229	82	361	4e-145	435
maker-tulip_contig_109_pilon_pilon-augustus-gene-1.35-mRNA-1	JAV76843.1 hypothetical protein [Photinus pyralis]	JAV76843.1	52.13	470	217	6	73	538	1	466	5e-176	518
maker-tulip_contig_109_pilon_pilon-augustus-gene-1.36-mRNA-1	XP_022814427.1 uncharacterized protein LOC111348150 [Spodoptera litura]	XP_022814427.1	74.09	274	71	0	1	274	545	818	5e-141	434
augustus_masked-tulip_contig_109_pilon_pilon-processed-gene-1.70-mRNA-1	XP_022815021.1 acyl-CoA synthetase family member 2, mitochondrial [Spodoptera litura]	XP_022815021.1	86.68	368	41	2	153	512	210	577	0	667
maker-tulip_contig_109_pilon_pilon-augustus-gene-1.41-mRNA-1	XP_022814522.1 uncharacterized protein LOC111348218 isoform X2 [Spodoptera litura]	XP_022814522.1	96.67	240	8	0	1	240	1	240	1e-171	483
augustus_masked-tulip_contig_109_pilon_pilon-processed-gene-1.74-mRNA-1	XP_022814523.1 RNA-binding protein Rsf1 [Spodoptera litura]	XP_022814523.1	100	147	0	0	1	147	1	147	2e-97	287
maker-tulip_contig_109_pilon_pilon-augustus-gene-1.43-mRNA-1	XP_021201292.1 etoposide-induced protein 2.4 homolog [Helicoverpa armigera]	XP_021201292.1	97.22	144	4	0	1	144	1	144	7e-93	284
augustus_masked-tulip_contig_109_pilon_pilon-processed-gene-1.76-mRNA-1	XP_021201419.1 uncharacterized protein LOC110384454 [Helicoverpa armigera]	XP_021201419.1	58.95	514	210	1	1	514	72	584	0	661
augustus_masked-tulip_contig_109_pilon_pilon-processed-gene-1.77-mRNA-1	PZC85044.1 hypothetical protein B5X24_HaOG200682 [Helicoverpa armigera]	PZC85044.1	58.2	579	236	4	1	577	10	584	0	715
augustus_masked-tulip_contig_109_pilon_pilon-processed-gene-1.78-mRNA-1	XP_022814432.1 uncharacterized protein LOC111348156 [Spodoptera litura]	XP_022814432.1	93.85	553	34	0	1458	2010	35	587	0	1087
augustus_masked-tulip_contig_109_pilon_pilon-processed-gene-1.79-mRNA-1	XP_021201262.1 polypeptide N-acetylgalactosaminyltransferase 2-like [Helicoverpa armigera]	XP_021201262.1	89.37	301	11	1	1	280	247	547	0	561
augustus_masked-tulip_contig_109_pilon_pilon-processed-gene-1.81-mRNA-1	JAI33313.1 PiggyBac transposable element-derived protein 4, partial [Bactrocera latifrons]	JAI33313.1	60.23	88	35	0	49	136	118	205	2e-29	117
augustus_masked-tulip_contig_346_pilon_pilon-processed-gene-0.44-mRNA-1	XP_021199144.1 UHRF1-binding protein 1-like, partial [Helicoverpa armigera]	XP_021199144.1	94.59	74	4	0	29	102	9	82	1e-27	106
augustus_masked-tulip_contig_346_pilon_pilon-processed-gene-0.45-mRNA-1	PCG65770.1 hypothetical protein B5V51_8699, partial [Heliothis virescens]	PCG65770.1	89.16	166	13	1	5	170	221	381	3e-95	301
maker-tulip_contig_346_pilon_pilon-augustus-gene-0.2-mRNA-1	XP_026736265.1 UHRF1-binding protein 1-like isoform X3 [Trichoplusia ni]	XP_026736265.1	75.81	215	21	3	6	190	655	868	1e-99	322
maker-tulip_contig_346_pilon_pilon-augustus-gene-0.12-mRNA-1	XP_022823409.1 UHRF1-binding protein 1-like isoform X6 [Spodoptera litura]	XP_022823409.1	97.89	237	5	0	1	237	1014	1250	9e-149	456
maker-tulip_contig_346_pilon_pilon-augustus-gene-0.14-mRNA-1	PZC71403.1 hypothetical protein B5X24_HaOG213494 [Helicoverpa armigera]	PZC71403.1	98.77	81	1	0	1	81	48	128	7e-52	176
augustus_masked-tulip_contig_346_pilon_pilon-processed-gene-0.49-mRNA-1	PZC71404.1 hypothetical protein B5X24_HaOG213495 [Helicoverpa armigera]	PZC71404.1	91.67	72	6	0	1	72	1	72	3e-40	138
augustus_masked-tulip_contig_346_pilon_pilon-processed-gene-0.50-mRNA-1	PCG66572.1 hypothetical protein B5V51_7535, partial [Heliothis virescens]	PCG66572.1	79.74	227	16	2	42	268	1	197	2e-127	374
augustus_masked-tulip_contig_346_pilon_pilon-processed-gene-0.51-mRNA-1	KPJ06998.1 Antigen EG13 [Papilio machaon]	KPJ06998.1	64.41	59	18	1	15	70	25	83	2e-15	75.5
maker-tulip_contig_346_pilon_pilon-augustus-gene-0.16-mRNA-1	XP_022823730.1 protein kinase C and casein kinase substrate in neurons protein 2 [Spodoptera litura]	XP_022823730.1	100	104	0	0	11	114	318	421	5e-68	219
maker-tulip_contig_346_pilon_pilon-augustus-gene-0.19-mRNA-1	XP_022823548.1 uncharacterized protein LOC111354351 [Spodoptera litura]	XP_022823548.1	80	55	11	0	24	78	129	183	2e-22	93.2
maker-tulip_contig_346_pilon_pilon-augustus-gene-0.20-mRNA-1	XP_022823549.1 calsequestrin-1-like [Spodoptera litura]	XP_022823549.1	74.47	94	24	0	1	94	1	94	3e-44	152
augustus_masked-tulip_contig_346_pilon_pilon-processed-gene-0.53-mRNA-1	XP_022823549.1 calsequestrin-1-like [Spodoptera litura]	XP_022823549.1	64.71	51	18	0	11	61	147	197	2e-16	77.8
maker-tulip_contig_346_pilon_pilon-augustus-gene-0.21-mRNA-1	XP_022823547.1 uncharacterized protein LOC111354350 [Spodoptera litura]	XP_022823547.1	84.31	51	8	0	14	64	130	180	7e-24	97.4
augustus_masked-tulip_contig_346_pilon_pilon-processed-gene-0.55-mRNA-1	PCG65213.1 hypothetical protein B5V51_9515 [Heliothis virescens]	PCG65213.1	96.94	98	3	0	1	98	1	98	4e-60	188
augustus_masked-tulip_contig_346_pilon_pilon-processed-gene-0.56-mRNA-1	XP_022823601.1 uncharacterized protein LOC111354392 [Spodoptera litura]	XP_022823601.1	91.74	242	20	0	1	242	1	242	7e-149	425
augustus_masked-tulip_contig_346_pilon_pilon-processed-gene-0.57-mRNA-1	XP_026746639.1 uncharacterized protein LOC113507901 isoform X2 [Trichoplusia ni]	XP_026746639.1	43.14	255	135	6	21	271	199	447	3e-56	201
maker-tulip_contig_346_pilon_pilon-augustus-gene-0.35-mRNA-1	PZC70485.1 hypothetical protein B5X24_HaOG215879, partial [Helicoverpa armigera]	PZC70485.1	83.08	260	29	1	1	245	1	260	1e-140	437
augustus_masked-tulip_contig_346_pilon_pilon-processed-gene-0.60-mRNA-1	XP_022823542.1 myotubularin-related protein 5 isoform X3 [Spodoptera litura]	XP_022823542.1	76.69	519	44	6	66	508	99	616	0	729
maker-tulip_contig_346_pilon_pilon-augustus-gene-0.42-mRNA-1	XP_022825451.1 arylsulfatase B-like [Spodoptera litura]	XP_022825451.1	86.6	597	28	2	1	546	1	596	0	1042
maker-tulip_contig_346_pilon_pilon-augustus-gene-0.3-mRNA-1	XP_021199337.1 uncharacterized protein LOC110382954, partial [Helicoverpa armigera]	XP_021199337.1	90.32	93	5	2	1	90	621	712	3e-46	167
augustus_masked-tulip_contig_172_pilon_pilon-processed-gene-0.2-mRNA-1	XP_022814998.1 uncharacterized protein LOC111348571 [Spodoptera litura]	XP_022814998.1	99.09	770	7	0	1	770	1	770	0	1589
maker-tulip_contig_172_pilon_pilon-augustus-gene-0.0-mRNA-1	PZC79890.1 hypothetical protein B5X24_HaOG215654 [Helicoverpa armigera]	PZC79890.1	50.59	678	301	12	99	767	1080	1732	0	680
maker-tulip_contig_439_pilon_pilon-augustus-gene-0.0-mRNA-1	XP_022825251.1 flexible cuticle protein 12-like [Spodoptera litura]	XP_022825251.1	80.37	107	20	1	1	107	1	106	2e-44	149
augustus_masked-tulip_contig_473_pilon_pilon-processed-gene-0.21-mRNA-1	PCG79300.1 hypothetical protein B5V51_1264 [Heliothis virescens]	PCG79300.1	67.01	194	21	1	60	210	1	194	5e-77	249
augustus_masked-tulip_contig_473_pilon_pilon-processed-gene-0.22-mRNA-1	XP_022835168.1 uncharacterized protein LOC111362683 [Spodoptera litura]	XP_022835168.1	89.64	338	35	0	1	338	1	338	0	626
maker-tulip_contig_473_pilon_pilon-augustus-gene-0.1-mRNA-1	XP_022831800.1 fatty acid synthase-like [Spodoptera litura]	XP_022831800.1	78.47	2327	362	7	1	2194	1	2321	0	3760
maker-tulip_contig_473_pilon_pilon-augustus-gene-0.9-mRNA-1	XP_022831465.1 serine protease gd-like isoform X7 [Spodoptera litura]	XP_022831465.1	75.18	278	10	2	3	221	250	527	7e-141	414
augustus_masked-tulip_contig_473_pilon_pilon-processed-gene-0.26-mRNA-1	XP_022831505.1 fatty acid synthase [Spodoptera litura]	XP_022831505.1	94.67	2422	68	3	9	2369	1	2422	0	4737
maker-tulip_contig_473_pilon_pilon-augustus-gene-0.13-mRNA-1	XP_022831839.1 uncharacterized protein LOC111360200 [Spodoptera litura]	XP_022831839.1	54.8	177	19	2	41	156	3	179	5e-55	180
maker-tulip_contig_473_pilon_pilon-augustus-gene-0.15-mRNA-1	XP_022832031.1 uncharacterized protein LOC111360359 isoform X2 [Spodoptera litura]	XP_022832031.1	89.52	105	11	0	43	147	803	907	7e-64	218
maker-tulip_contig_473_pilon_pilon-augustus-gene-0.16-mRNA-1	XP_022832030.1 uncharacterized protein LOC111360359 isoform X1 [Spodoptera litura]	XP_022832030.1	69.12	625	132	9	1	575	1	614	0	808
maker-tulip_contig_473_pilon_pilon-augustus-gene-0.19-mRNA-1	XP_022832138.1 uncharacterized protein LOC111360434 [Spodoptera litura]	XP_022832138.1	66.51	209	34	1	1	173	1	209	4e-85	259
augustus_masked-tulip_contig_473_pilon_pilon-processed-gene-1.2-mRNA-1	XP_022831600.1 uncharacterized protein LOC111360033 [Spodoptera litura]	XP_022831600.1	84.68	803	73	9	247	1000	269	1070	0	1183
augustus_masked-tulip_contig_473_pilon_pilon-processed-gene-1.3-mRNA-1	PCG79111.1 hypothetical protein B5V51_2027 [Heliothis virescens]	PCG79111.1	50.27	183	79	4	1	180	88	261	8e-49	177
maker-tulip_contig_473_pilon_pilon-augustus-gene-1.23-mRNA-1	XP_022832056.1 DNA-directed RNA polymerase III subunit RPC10 [Spodoptera litura]	XP_022832056.1	99.07	108	1	0	1	108	1	108	2e-76	230
augustus_masked-tulip_contig_473_pilon_pilon-processed-gene-1.5-mRNA-1	XP_022832054.1 yrdC domain-containing protein, mitochondrial [Spodoptera litura]	XP_022832054.1	93.06	245	17	0	1	245	1	245	3e-169	477
augustus_masked-tulip_contig_473_pilon_pilon-processed-gene-1.6-mRNA-1	XP_022832016.1 ataxin-7-like protein 1 [Spodoptera litura]	XP_022832016.1	99.02	712	6	1	1	712	1	711	0	1432
maker-tulip_contig_473_pilon_pilon-augustus-gene-1.25-mRNA-1	XP_022831808.1 merlin-like [Spodoptera litura]	XP_022831808.1	77.47	648	18	5	1	520	1	648	0	971
maker-tulip_contig_473_pilon_pilon-augustus-gene-1.28-mRNA-1	XP_022832177.1 Meckel syndrome type 1 protein-like [Spodoptera litura]	XP_022832177.1	83.46	508	63	2	1	487	1	508	0	860
augustus_masked-tulip_contig_473_pilon_pilon-processed-gene-1.11-mRNA-1	XP_022831592.1 uncharacterized protein LOC111360028 isoform X1 [Spodoptera litura]	XP_022831592.1	93.74	431	22	3	1	428	1	429	0	761
augustus_masked-tulip_contig_473_pilon_pilon-processed-gene-1.0-mRNA-1	XP_022831476.1 sex-lethal homolog isoform X2 [Spodoptera litura]	XP_022831476.1	97.78	90	2	0	10	99	204	293	5e-59	192
maker-tulip_contig_473_pilon_pilon-augustus-gene-1.29-mRNA-1	XP_022831477.1 sex-lethal homolog isoform X3 [Spodoptera litura]	XP_022831477.1	77	313	8	2	1	313	1	249	3e-167	477
maker-tulip_contig_473_pilon_pilon-augustus-gene-1.32-mRNA-1	XP_022831599.1 ceramide synthase 6-like [Spodoptera litura]	XP_022831599.1	98.13	267	5	0	1	267	99	365	0	541
maker-tulip_contig_473_pilon_pilon-augustus-gene-1.35-mRNA-1	XP_022832161.1 ceramide synthase 6-like [Spodoptera litura]	XP_022832161.1	80.53	113	22	0	46	158	249	361	5e-55	186
maker-tulip_contig_473_pilon_pilon-augustus-gene-1.40-mRNA-1	XP_022832053.1 ceramide synthase 5-like isoform X3 [Spodoptera litura]	XP_022832053.1	81.78	258	17	2	1	228	117	374	1e-127	376
augustus_masked-tulip_contig_473_pilon_pilon-processed-gene-1.16-mRNA-1	XP_022832055.1 mitochondrial inner membrane protease subunit 2 [Spodoptera litura]	XP_022832055.1	96.32	163	6	0	1	163	1	163	2e-112	326
augustus_masked-tulip_contig_473_pilon_pilon-processed-gene-1.17-mRNA-1	XP_022831509.1 RRP12-like protein isoform X1 [Spodoptera litura]	XP_022831509.1	73.37	1322	94	16	52	1115	47	1368	0	1819
augustus_masked-tulip_contig_473_pilon_pilon-processed-gene-1.18-mRNA-1	XP_022831651.1 uncharacterized protein KIAA2013 homolog [Spodoptera litura]	XP_022831651.1	98.72	625	8	0	1	625	1	625	0	1290
augustus_masked-tulip_contig_473_pilon_pilon-processed-gene-1.19-mRNA-1	PCG65958.1 hypothetical protein B5V51_8377 [Heliothis virescens]	PCG65958.1	56.78	1157	310	21	34	1062	18	1112	0	1219
maker-tulip_contig_473_pilon_pilon-augustus-gene-1.55-mRNA-1	XP_021199026.1 rhomboid-related protein 1-like isoform X1 [Helicoverpa armigera]	XP_021199026.1	67.94	287	78	4	1	276	1	284	2e-112	336
augustus_masked-tulip_contig_473_pilon_pilon-processed-gene-1.22-mRNA-1	XP_022831595.1 uncharacterized protein LOC111360030 isoform X1 [Spodoptera litura]	XP_022831595.1	83.69	282	19	2	10	265	21	301	3e-135	394
maker-tulip_contig_473_pilon_pilon-augustus-gene-1.36-mRNA-1	XP_022832161.1 ceramide synthase 6-like [Spodoptera litura]	XP_022832161.1	64.41	177	39	1	1	153	110	286	8e-71	227
maker-tulip_contig_473_pilon_pilon-augustus-gene-1.34-mRNA-1	XP_022831599.1 ceramide synthase 6-like [Spodoptera litura]	XP_022831599.1	98.33	60	1	0	9	68	1	60	1e-33	125
maker-tulip_contig_473_pilon_pilon-augustus-gene-2.0-mRNA-1	XP_022831592.1 uncharacterized protein LOC111360028 isoform X1 [Spodoptera litura]	XP_022831592.1	92.25	258	8	3	1	249	501	755	4e-159	479
maker-tulip_contig_473_pilon_pilon-augustus-gene-2.1-mRNA-1	XP_022831594.1 rho GTPase-activating protein 27-like isoform X3 [Spodoptera litura]	XP_022831594.1	99.61	254	1	0	54	307	690	943	7e-177	524
maker-tulip_contig_473_pilon_pilon-augustus-gene-2.4-mRNA-1	PCG76773.1 hypothetical protein B5V51_8711 [Heliothis virescens]	PCG76773.1	83.52	182	30	0	1	182	1	182	2e-107	327
maker-tulip_contig_473_pilon_pilon-augustus-gene-2.5-mRNA-1	PCG76773.1 hypothetical protein B5V51_8711 [Heliothis virescens]	PCG76773.1	61.21	214	49	2	32	234	325	515	1e-83	268
maker-tulip_contig_473_pilon_pilon-augustus-gene-2.8-mRNA-1	XP_011554026.1 PREDICTED: uncharacterized protein LOC105385364 [Plutella xylostella]	XP_011554026.1	47.86	117	51	2	107	213	11	127	4e-23	99.8
augustus_masked-tulip_contig_473_pilon_pilon-processed-gene-2.22-mRNA-1	XP_021191395.1 GPI transamidase component PIG-S [Helicoverpa armigera]	XP_021191395.1	70.24	420	62	5	1	362	16	430	0	552
augustus_masked-tulip_contig_473_pilon_pilon-processed-gene-2.24-mRNA-1	XP_022837098.1 uncharacterized protein K02A2.6-like [Spodoptera litura]	XP_022837098.1	91.55	71	6	0	1	71	1	71	2e-38	147
augustus_masked-tulip_contig_473_pilon_pilon-processed-gene-2.26-mRNA-1	XP_022831690.1 uncharacterized protein LOC111360090 [Spodoptera litura]	XP_022831690.1	100	177	0	0	1	177	1	177	2e-124	358
augustus_masked-tulip_contig_473_pilon_pilon-processed-gene-2.28-mRNA-1	XP_022831796.1 uncharacterized protein LOC111360156 [Spodoptera litura]	XP_022831796.1	92.28	583	44	1	1	583	1	582	0	1040
maker-tulip_contig_473_pilon_pilon-augustus-gene-2.12-mRNA-1	XP_022831528.1 alpha-tocopherol transfer protein-like [Spodoptera litura]	XP_022831528.1	99.33	149	1	0	1	149	153	301	2e-102	305
augustus_masked-tulip_contig_473_pilon_pilon-processed-gene-2.30-mRNA-1	PZC77174.1 hypothetical protein B5X24_HaOG203652 [Helicoverpa armigera]	PZC77174.1	95.92	98	4	0	1	98	1	98	4e-62	193
maker-tulip_contig_473_pilon_pilon-augustus-gene-2.14-mRNA-1	XP_022831342.1 protein I'm not dead yet [Spodoptera litura]	XP_022831342.1	75.28	360	41	5	141	473	212	550	2e-158	475
augustus_masked-tulip_contig_473_pilon_pilon-processed-gene-2.32-mRNA-1	XP_011883917.1 PREDICTED: putative nuclease HARBI1, partial [Vollenhovia emeryi]	XP_011883917.1	49.23	130	65	1	71	199	46	175	2e-30	119
maker-tulip_contig_473_pilon_pilon-augustus-gene-2.15-mRNA-1	XP_022831806.1 uncharacterized protein LOC111360166 [Spodoptera litura]	XP_022831806.1	100	348	0	0	1	348	1	348	0	726
maker-tulip_contig_473_pilon_pilon-augustus-gene-2.11-mRNA-1	PCG76777.1 hypothetical protein B5V51_8715 [Heliothis virescens]	PCG76777.1	88.59	412	47	0	14	425	63	474	0	742
maker-tulip_contig_386_pilon_pilon-augustus-gene-0.0-mRNA-1	JAV94073.1 hypothetical protein [Photinus pyralis]	JAV94073.1	39.22	640	366	11	92	712	6	641	2e-144	447
maker-tulip_contig_725_pilon_pilon-augustus-gene-0.1-mRNA-1	XP_022816304.1 degenerin del-1-like [Spodoptera litura]	XP_022816304.1	79.73	74	4	1	8	81	156	218	4e-31	119
maker-tulip_contig_457_pilon_pilon-augustus-gene-0.0-mRNA-1	XP_022820972.1 nephrin [Spodoptera litura]	XP_022820972.1	99.57	231	1	0	4	234	71	301	1e-162	475
augustus_masked-tulip_contig_457_pilon_pilon-processed-gene-0.14-mRNA-1	XP_026314447.1 nephrin-like [Hyposmocoma kahamanoa]	XP_026314447.1	63.09	363	117	7	60	407	378	738	2e-126	392
augustus_masked-tulip_contig_457_pilon_pilon-processed-gene-0.15-mRNA-1	XP_022820971.1 uncharacterized protein LOC111352613 [Spodoptera litura]	XP_022820971.1	61.69	650	241	4	34	677	124	771	0	804
maker-tulip_contig_457_pilon_pilon-augustus-gene-0.7-mRNA-1	XP_022820644.1 glutathione hydrolase 6-like [Spodoptera litura]	XP_022820644.1	86.84	190	13	2	101	286	14	195	3e-81	263
maker-tulip_contig_457_pilon_pilon-augustus-gene-0.8-mRNA-1	XP_022820644.1 glutathione hydrolase 6-like [Spodoptera litura]	XP_022820644.1	63.64	176	37	3	29	186	320	486	1e-43	160
augustus_masked-tulip_contig_457_pilon_pilon-processed-gene-0.19-mRNA-1	XP_026726610.1 uncharacterized protein LOC113493030 [Trichoplusia ni]	XP_026726610.1	59.53	514	178	9	43	541	25	523	2e-160	498
maker-tulip_contig_457_pilon_pilon-augustus-gene-0.10-mRNA-1	XP_026726610.1 uncharacterized protein LOC113493030 [Trichoplusia ni]	XP_026726610.1	56.92	130	54	1	6	133	695	824	4e-34	139
maker-tulip_contig_457_pilon_pilon-augustus-gene-0.11-mRNA-1	XP_022820973.1 arrestin homolog [Spodoptera litura]	XP_022820973.1	99.03	206	2	0	24	229	1	206	8e-145	424
maker-tulip_contig_457_pilon_pilon-augustus-gene-0.12-mRNA-1	RVE43552.1 hypothetical protein evm_011779 [Chilo suppressalis]	RVE43552.1	73.83	363	77	5	1	350	31	388	5e-169	490
maker-tulip_contig_773_pilon_pilon-augustus-gene-0.13-mRNA-1	XP_023949287.1 neuropeptide CCHamide-1 receptor-like [Bicyclus anynana]	XP_023949287.1	91.14	79	7	0	5	83	59	137	6e-45	150
augustus_masked-tulip_contig_773_pilon_pilon-processed-gene-0.1-mRNA-1	XP_022822770.1 neuropeptide CCHamide-1 receptor [Spodoptera litura]	XP_022822770.1	97.96	245	5	0	6	250	144	388	9e-175	497
maker-tulip_contig_773_pilon_pilon-augustus-gene-0.17-mRNA-1	XP_022822976.1 zinc finger HIT domain-containing protein 1 [Spodoptera litura]	XP_022822976.1	98.68	152	2	0	1	152	1	152	3e-108	315
augustus_masked-tulip_contig_773_pilon_pilon-processed-gene-0.4-mRNA-1	XP_022823204.1 glyoxylate reductase/hydroxypyruvate reductase-like [Spodoptera litura]	XP_022823204.1	92.55	322	24	0	1	322	1	322	0	597
maker-tulip_contig_773_pilon_pilon-augustus-gene-0.19-mRNA-1	XP_022822908.1 glyoxylate reductase/hydroxypyruvate reductase-like isoform X1 [Spodoptera litura]	XP_022822908.1	81.36	354	11	2	1	299	1	354	0	537
augustus_masked-tulip_contig_773_pilon_pilon-processed-gene-0.10-mRNA-1	XP_022822970.1 uncharacterized protein LOC111353967 isoform X1 [Spodoptera litura]	XP_022822970.1	70.18	1945	493	19	558	2474	816	2701	0	2642
maker-tulip_contig_773_pilon_pilon-augustus-gene-0.32-mRNA-1	XP_021186097.1 meiotic nuclear division protein 1 homolog [Helicoverpa armigera]	XP_021186097.1	89.32	206	22	0	1	206	1	206	1e-131	379
augustus_masked-tulip_contig_773_pilon_pilon-processed-gene-0.12-mRNA-1	XP_022823170.1 protein atonal homolog 8 [Spodoptera litura]	XP_022823170.1	97.89	237	5	0	62	298	17	253	1e-164	468
maker-tulip_contig_773_pilon_pilon-augustus-gene-1.24-mRNA-1	XP_022823292.1 uncharacterized protein LOC111354185 isoform X1 [Spodoptera litura]	XP_022823292.1	97.61	585	14	0	1	585	1	585	0	1183
maker-tulip_contig_773_pilon_pilon-augustus-gene-1.27-mRNA-1	KPJ18622.1 hypothetical protein RR48_10566 [Papilio machaon]	KPJ18622.1	87.58	161	11	1	1	161	1	152	6e-94	279
augustus_masked-tulip_contig_773_pilon_pilon-processed-gene-1.6-mRNA-1	XP_022822633.1 nucleoside diphosphate-linked moiety X motif 8-like [Spodoptera litura]	XP_022822633.1	96.79	218	7	0	1	218	12	229	5e-157	444
augustus_masked-tulip_contig_773_pilon_pilon-processed-gene-1.7-mRNA-1	XP_022823076.1 serine protease inhibitor dipetalogastin-like [Spodoptera litura]	XP_022823076.1	91.8	183	15	0	1	183	1	183	2e-116	353
augustus_masked-tulip_contig_773_pilon_pilon-processed-gene-1.8-mRNA-1	XP_022822725.1 congested-like trachea protein [Spodoptera litura]	XP_022822725.1	98.32	298	5	0	1	298	1	298	0	604
maker-tulip_contig_773_pilon_pilon-augustus-gene-1.28-mRNA-1	XP_022823162.1 sarcoplasmic calcium-binding protein 1 isoform X1 [Spodoptera litura]	XP_022823162.1	86.94	222	2	1	1	222	1	195	3e-134	385
maker-tulip_contig_773_pilon_pilon-augustus-gene-1.31-mRNA-1	XP_022822855.1 myb/SANT-like DNA-binding domain-containing protein 3 [Spodoptera litura]	XP_022822855.1	90.48	231	22	0	1	231	1	231	1e-157	446
augustus_masked-tulip_contig_773_pilon_pilon-processed-gene-1.11-mRNA-1	XP_022823130.1 glyoxylate reductase/hydroxypyruvate reductase [Spodoptera litura]	XP_022823130.1	93.91	345	21	0	1	345	1	345	0	677
maker-tulip_contig_773_pilon_pilon-augustus-gene-1.35-mRNA-1	XP_022822729.1 SH2 domain-containing protein 4A-like [Spodoptera litura]	XP_022822729.1	85.03	294	8	1	14	271	45	338	4e-173	496
maker-tulip_contig_773_pilon_pilon-augustus-gene-1.38-mRNA-1	XP_022822910.1 ragulator complex protein LAMTOR3 homolog [Spodoptera litura]	XP_022822910.1	99.2	125	1	0	1	125	1	125	2e-86	257
augustus_masked-tulip_contig_773_pilon_pilon-processed-gene-1.14-mRNA-1	XP_022823297.1 pre-mRNA-splicing factor Syf2-like [Spodoptera litura]	XP_022823297.1	99.15	235	2	0	1	235	1	235	1e-169	477
augustus_masked-tulip_contig_773_pilon_pilon-processed-gene-1.15-mRNA-1	XP_022823297.1 pre-mRNA-splicing factor Syf2-like [Spodoptera litura]	XP_022823297.1	94.04	235	14	0	1	235	1	235	1e-157	447
augustus_masked-tulip_contig_773_pilon_pilon-processed-gene-1.16-mRNA-1	XP_022823297.1 pre-mRNA-splicing factor Syf2-like [Spodoptera litura]	XP_022823297.1	97.87	235	5	0	1	235	1	235	2e-166	469
augustus_masked-tulip_contig_773_pilon_pilon-processed-gene-1.17-mRNA-1	XP_022822636.1 nucleoside diphosphate-linked moiety X motif 8-like [Spodoptera litura]	XP_022822636.1	81.94	216	39	0	1	216	1	216	9e-133	382
maker-tulip_contig_773_pilon_pilon-augustus-gene-1.40-mRNA-1	PCG66359.1 hypothetical protein B5V51_7779 [Heliothis virescens]	PCG66359.1	66.67	75	25	0	1	75	1	75	1e-32	116
augustus_masked-tulip_contig_773_pilon_pilon-processed-gene-1.18-mRNA-1	XP_022822722.1 SWI/SNF-related matrix-associated actin-dependent regulator of chromatin subfamily A-like protein 1 [Spodoptera litura]	XP_022822722.1	74.42	301	21	3	1	245	1	301	2e-142	434
augustus_masked-tulip_contig_773_pilon_pilon-processed-gene-1.19-mRNA-1	XP_022822724.1 G patch domain and ankyrin repeat-containing protein 1 homolog [Spodoptera litura]	XP_022822724.1	86.6	306	39	2	1	306	1	304	0	528
maker-tulip_contig_773_pilon_pilon-augustus-gene-1.44-mRNA-1	XP_022822707.1 Niemann-Pick C1 protein isoform X2 [Spodoptera litura]	XP_022822707.1	95.32	1004	43	1	1	1004	336	1335	0	1939
maker-tulip_contig_773_pilon_pilon-augustus-gene-1.49-mRNA-1	XP_022823197.1 cyclin-dependent kinase-like 1 [Spodoptera litura]	XP_022823197.1	97.71	349	8	0	1	349	1	349	0	706
maker-tulip_contig_773_pilon_pilon-augustus-gene-2.26-mRNA-1	XP_022823167.1 zinc finger CCHC domain-containing protein 24-like [Spodoptera litura]	XP_022823167.1	99.48	194	1	0	1	194	1	194	1e-139	398
maker-tulip_contig_773_pilon_pilon-augustus-gene-2.28-mRNA-1	XP_026744937.1 serine protease inhibitor Kazal-type 1-like [Trichoplusia ni]	XP_026744937.1	47.44	78	39	2	1	78	1	76	7e-17	76.3
maker-tulip_contig_773_pilon_pilon-augustus-gene-2.31-mRNA-1	XP_022822792.1 organic cation transporter protein-like [Spodoptera litura]	XP_022822792.1	92.47	425	32	0	23	447	120	544	0	808
maker-tulip_contig_773_pilon_pilon-augustus-gene-2.33-mRNA-1	PCG69969.1 hypothetical protein B5V51_3501 [Heliothis virescens]	PCG69969.1	59.38	64	24	1	186	249	154	215	1e-15	81.6
maker-tulip_contig_773_pilon_pilon-augustus-gene-2.34-mRNA-1	AYM01176.1 glutathione-S-transferase sigma class [Spodoptera littoralis]	AYM01176.1	82.84	204	35	0	1	204	1	204	5e-124	359
maker-tulip_contig_773_pilon_pilon-augustus-gene-2.35-mRNA-1	AFF27579.1 glutathione S-transferase S protein [Spodoptera exigua]	AFF27579.1	85.91	149	21	0	1	149	51	199	3e-86	261
maker-tulip_contig_773_pilon_pilon-augustus-gene-2.36-mRNA-1	XP_022822916.1 non-structural maintenance of chromosomes element 3 homolog [Spodoptera litura]	XP_022822916.1	59.01	222	34	4	4	168	1	222	7e-77	238
augustus_masked-tulip_contig_773_pilon_pilon-processed-gene-2.7-mRNA-1	XP_022823072.1 mitochondrial 2-oxoglutarate/malate carrier protein-like, partial [Spodoptera litura]	XP_022823072.1	88.24	68	8	0	3	70	20	87	8e-33	121
maker-tulip_contig_773_pilon_pilon-augustus-gene-2.40-mRNA-1	XP_022822924.1 mitochondrial 2-oxoglutarate/malate carrier protein-like [Spodoptera litura]	XP_022822924.1	71.15	156	43	1	9	162	303	458	3e-76	244
maker-tulip_contig_773_pilon_pilon-augustus-gene-2.42-mRNA-1	XP_022822940.1 slowpoke-binding protein isoform X3 [Spodoptera litura]	XP_022822940.1	92.08	366	5	1	1	342	1	366	0	687
maker-tulip_contig_773_pilon_pilon-augustus-gene-2.45-mRNA-1	XP_022822982.1 mitochondrial 2-oxoglutarate/malate carrier protein-like [Spodoptera litura]	XP_022822982.1	86.58	298	39	1	1	298	1	297	0	539
augustus_masked-tulip_contig_773_pilon_pilon-processed-gene-2.10-mRNA-1	XP_022822620.1 ski oncogene [Spodoptera litura]	XP_022822620.1	97.45	274	7	0	1	274	1	274	0	544
maker-tulip_contig_773_pilon_pilon-augustus-gene-2.48-mRNA-1	XP_022823240.1 transcription activator MSS11-like [Spodoptera litura]	XP_022823240.1	77.57	798	140	10	1	791	1	766	0	1015
maker-tulip_contig_773_pilon_pilon-augustus-gene-2.49-mRNA-1	XP_022822720.1 myeloid leukemia factor isoform X2 [Spodoptera litura]	XP_022822720.1	52.94	221	59	5	1	176	1	221	4e-60	197
augustus_masked-tulip_contig_773_pilon_pilon-processed-gene-2.13-mRNA-1	XP_026739279.1 uncharacterized protein LOC113502097 [Trichoplusia ni]	XP_026739279.1	38.43	216	128	4	335	546	12	226	7e-38	153
augustus_masked-tulip_contig_773_pilon_pilon-processed-gene-2.14-mRNA-1	XP_022822671.1 glutathione S-transferase 2-like [Spodoptera litura]	XP_022822671.1	80.6	201	15	1	1	177	1	201	5e-110	322
maker-tulip_contig_773_pilon_pilon-augustus-gene-2.54-mRNA-1	AEG75844.1 glutathione S-transferase s3 protein [Spodoptera litura]	AEG75844.1	70.1	204	37	1	1	180	1	204	7e-99	294
maker-tulip_contig_773_pilon_pilon-augustus-gene-2.55-mRNA-1	AFF27579.1 glutathione S-transferase S protein [Spodoptera exigua]	AFF27579.1	83.82	204	1	1	1	172	1	204	6e-112	327
maker-tulip_contig_773_pilon_pilon-augustus-gene-2.56-mRNA-1	AEG75843.1 glutathione S-transferase s2 protein [Spodoptera litura]	AEG75843.1	47.09	206	33	4	1	132	1	204	1e-43	151
maker-tulip_contig_773_pilon_pilon-augustus-gene-2.75-mRNA-1	AFF27579.1 glutathione S-transferase S protein [Spodoptera exigua]	AFF27579.1	87.66	154	19	0	1	154	51	204	2e-91	274
augustus_masked-tulip_contig_773_pilon_pilon-processed-gene-2.19-mRNA-1	AIH07591.1 glutathione S-transferase sigma 4 [Spodoptera litura]	AIH07591.1	94.61	204	11	0	1	204	1	204	1e-138	396
maker-tulip_contig_773_pilon_pilon-augustus-gene-2.87-mRNA-1	XP_022822914.1 SET and MYND domain-containing protein 4-like [Spodoptera litura]	XP_022822914.1	71.81	454	123	3	1	449	1	454	0	664
augustus_masked-tulip_contig_773_pilon_pilon-processed-gene-2.21-mRNA-1	XP_013180151.1 PREDICTED: uncharacterized protein LOC106126821 isoform X3 [Papilio xuthus]	XP_013180151.1	78.16	87	19	0	2	88	3	89	4e-44	147
augustus_masked-tulip_contig_773_pilon_pilon-processed-gene-2.22-mRNA-1	XP_022822858.1 sepiapterin reductase [Spodoptera litura]	XP_022822858.1	96.64	268	9	0	1	268	1	268	0	535
maker-tulip_contig_773_pilon_pilon-augustus-gene-2.89-mRNA-1	PCG80324.1 hypothetical protein B5V51_9313 [Heliothis virescens]	PCG80324.1	91.11	90	8	0	1	90	1	90	4e-54	172
maker-tulip_contig_773_pilon_pilon-augustus-gene-2.90-mRNA-1	AAT72922.1 sterol carrier protein 2/3-oxoacyl-CoA thiolase [Spodoptera littoralis]	AAT72922.1	98.69	535	7	0	1	535	1	535	0	1091
maker-tulip_contig_773_pilon_pilon-augustus-gene-2.93-mRNA-1	XP_022823073.1 uncharacterized protein LOC111354035 [Spodoptera litura]	XP_022823073.1	94.86	389	20	0	2	390	31	419	0	772
maker-tulip_contig_773_pilon_pilon-augustus-gene-2.76-mRNA-1	AEG75843.1 glutathione S-transferase s2 protein [Spodoptera litura]	AEG75843.1	84.09	44	7	0	26	69	1	44	5e-19	84.7
maker-tulip_contig_773_pilon_pilon-augustus-gene-3.20-mRNA-1	XP_021186126.1 uncharacterized protein LOC110373240 [Helicoverpa armigera]	XP_021186126.1	94.92	118	6	0	10	127	15	132	7e-79	238
maker-tulip_contig_773_pilon_pilon-augustus-gene-3.21-mRNA-1	XP_022823149.1 uncharacterized protein LOC111354100 [Spodoptera litura]	XP_022823149.1	86.43	140	19	0	1	140	1	140	5e-81	244
augustus_masked-tulip_contig_773_pilon_pilon-processed-gene-3.3-mRNA-1	XP_022823305.1 uncharacterized protein LOC111354196 isoform X1 [Spodoptera litura]	XP_022823305.1	96.02	1105	44	0	1	1105	1	1105	0	2187
maker-tulip_contig_773_pilon_pilon-augustus-gene-3.27-mRNA-1	XP_022822931.1 uncharacterized protein LOC111353940 isoform X2 [Spodoptera litura]	XP_022822931.1	82.93	205	35	0	1	205	1	205	4e-131	378
maker-tulip_contig_773_pilon_pilon-augustus-gene-3.29-mRNA-1	XP_022823017.1 nucleolar MIF4G domain-containing protein 1 homolog [Spodoptera litura]	XP_022823017.1	81.62	593	65	6	10	572	13	591	0	869
maker-tulip_contig_773_pilon_pilon-augustus-gene-3.30-mRNA-1	PCG68114.1 hypothetical protein B5V51_5582 [Heliothis virescens]	PCG68114.1	85.12	242	23	1	1	229	447	688	2e-142	424
augustus_masked-tulip_contig_773_pilon_pilon-processed-gene-3.7-mRNA-1	PCG68113.1 hypothetical protein B5V51_5581 [Heliothis virescens]	PCG68113.1	95.79	95	4	0	1	95	1	95	2e-58	184
maker-tulip_contig_773_pilon_pilon-augustus-gene-3.33-mRNA-1	XP_022822881.1 phosphatidylinositol 3,4,5-trisphosphate 3-phosphatase and dual-specificity protein phosphatase PTEN isoform X2 [Spodoptera litura]	XP_022822881.1	99.19	248	2	0	1	248	139	386	0	522
maker-tulip_contig_773_pilon_pilon-augustus-gene-3.35-mRNA-1	XP_022822721.1 uncharacterized protein LOC111353782 [Spodoptera litura]	XP_022822721.1	84	300	32	3	1	284	1	300	2e-179	506
maker-tulip_contig_773_pilon_pilon-augustus-gene-3.37-mRNA-1	XP_022823011.1 uncharacterized protein LOC111353992 [Spodoptera litura]	XP_022823011.1	91.49	141	12	0	3	143	1	141	4e-92	273
maker-tulip_contig_773_pilon_pilon-augustus-gene-3.38-mRNA-1	XP_022823194.1 uncharacterized protein LOC111354135 [Spodoptera litura]	XP_022823194.1	87.69	130	16	0	8	137	24	153	2e-82	249
augustus_masked-tulip_contig_773_pilon_pilon-processed-gene-3.12-mRNA-1	XP_022822932.1 uncharacterized protein LOC111353941 [Spodoptera litura]	XP_022822932.1	90.8	163	15	0	25	187	65	227	1e-106	315
augustus_masked-tulip_contig_773_pilon_pilon-processed-gene-3.14-mRNA-1	XP_022836067.1 ATPase family AAA domain-containing protein 1-B-like [Spodoptera litura]	XP_022836067.1	97.49	199	5	0	1	199	1	199	7e-142	404
augustus_masked-tulip_contig_773_pilon_pilon-processed-gene-3.15-mRNA-1	XP_022823158.1 methyltransferase-like protein 14 homolog [Spodoptera litura]	XP_022823158.1	99.35	307	2	0	5	311	76	382	0	642
maker-tulip_contig_773_pilon_pilon-augustus-gene-3.48-mRNA-1	JAT86239.1 hypothetical protein g.6068, partial [Pectinophora gossypiella]	JAT86239.1	81.87	182	33	0	218	399	1	182	6e-97	303
maker-tulip_contig_773_pilon_pilon-augustus-gene-3.51-mRNA-1	XP_022835694.1 zonadhesin-like, partial [Spodoptera litura]	XP_022835694.1	95.1	102	5	0	1	102	61	162	1e-62	202
maker-tulip_contig_773_pilon_pilon-augustus-gene-3.52-mRNA-1	XP_022822612.1 uncharacterized protein LOC111353717 [Spodoptera litura]	XP_022822612.1	97.95	683	14	0	6	688	165	847	0	1385
augustus_masked-tulip_contig_773_pilon_pilon-processed-gene-3.19-mRNA-1	JAA84937.1 Protein Dok-7, partial [Pararge aegeria]	JAA84937.1	91.34	127	11	0	11	137	10	136	3e-82	248
maker-tulip_contig_773_pilon_pilon-augustus-gene-4.20-mRNA-1	XP_022822613.1 uncharacterized protein LOC111353718 [Spodoptera litura]	XP_022822613.1	87.85	247	27	2	1	245	1	246	4e-156	444
augustus_masked-tulip_contig_773_pilon_pilon-processed-gene-4.1-mRNA-1	XP_022832209.1 igLON family member 5 isoform X2 [Spodoptera litura]	XP_022832209.1	68.09	351	35	5	6	279	94	444	5e-149	435
maker-tulip_contig_773_pilon_pilon-augustus-gene-4.25-mRNA-1	XP_022834725.1 uncharacterized protein LOC111362301 isoform X3 [Spodoptera litura]	XP_022834725.1	79.78	89	18	0	1	89	1	89	1e-45	161
augustus_masked-tulip_contig_773_pilon_pilon-processed-gene-4.3-mRNA-1	XP_022833841.1 zinc finger protein 879-like isoform X2 [Spodoptera litura]	XP_022833841.1	80	40	8	0	78	117	362	401	5e-13	72.8
augustus_masked-tulip_contig_773_pilon_pilon-processed-gene-4.4-mRNA-1	XP_022830338.1 uncharacterized protein LOC111359121 [Spodoptera litura]	XP_022830338.1	88.32	214	24	1	77	290	248	460	2e-121	365
maker-tulip_contig_773_pilon_pilon-augustus-gene-4.28-mRNA-1	XP_022830338.1 uncharacterized protein LOC111359121 [Spodoptera litura]	XP_022830338.1	88.02	167	20	0	1	167	294	460	3e-91	283
maker-tulip_contig_773_pilon_pilon-augustus-gene-4.31-mRNA-1	XP_022833858.1 tubulin beta chain-like [Spodoptera litura]	XP_022833858.1	82.42	91	0	1	1	75	74	164	3e-41	149
maker-tulip_contig_773_pilon_pilon-augustus-gene-4.33-mRNA-1	XP_021197315.1 transcriptional regulator Erg-like, partial [Helicoverpa armigera]	XP_021197315.1	42.68	82	5	2	1	81	1	41	2e-08	56.2
maker-tulip_contig_773_pilon_pilon-augustus-gene-4.35-mRNA-1	XP_022830303.1 BTB/POZ domain-containing protein 7, partial [Spodoptera litura]	XP_022830303.1	78.57	56	12	0	7	62	331	386	3e-09	64.7
augustus_masked-tulip_contig_773_pilon_pilon-processed-gene-4.9-mRNA-1	PCG74670.1 hypothetical protein B5V51_12954 [Heliothis virescens]	PCG74670.1	50	98	19	2	1	68	231	328	1e-17	81.6
maker-tulip_contig_773_pilon_pilon-augustus-gene-4.37-mRNA-1	XP_022833872.1 zinc finger protein 7-like isoform X1 [Spodoptera litura]	XP_022833872.1	71.88	96	11	1	1	80	1	96	2e-36	134
maker-tulip_contig_773_pilon_pilon-augustus-gene-4.39-mRNA-1	XP_022833828.1 zinc finger protein 70-like [Spodoptera litura]	XP_022833828.1	50.93	269	30	4	1	168	1	268	8e-70	233
augustus_masked-tulip_contig_773_pilon_pilon-processed-gene-4.11-mRNA-1	XP_022833866.1 zinc finger protein 58-like [Spodoptera litura]	XP_022833866.1	98.26	403	7	0	1	403	1	403	0	812
maker-tulip_contig_773_pilon_pilon-augustus-gene-4.40-mRNA-1	XP_022830284.1 uncharacterized protein LOC111359074, partial [Spodoptera litura]	XP_022830284.1	74.34	265	63	3	2	261	12	276	4e-137	398
maker-tulip_contig_773_pilon_pilon-augustus-gene-4.42-mRNA-1	XP_022833328.1 uncharacterized protein LOC111361187 [Spodoptera litura]	XP_022833328.1	70.56	496	119	4	1	478	1	487	0	712
augustus_masked-tulip_contig_773_pilon_pilon-processed-gene-4.14-mRNA-1	XP_026744666.1 uncharacterized protein LOC113506002 [Trichoplusia ni]	XP_026744666.1	58.56	111	46	0	1	111	133	243	1e-40	148
augustus_masked-tulip_contig_773_pilon_pilon-processed-gene-4.15-mRNA-1	PCG69827.1 hypothetical protein B5V51_3628 [Heliothis virescens]	PCG69827.1	42.62	420	201	9	64	459	77	480	8e-96	306
augustus_masked-tulip_contig_773_pilon_pilon-processed-gene-4.16-mRNA-1	XP_022831833.1 protein toll-like [Spodoptera litura]	XP_022831833.1	60.31	776	213	9	36	718	215	988	0	883
augustus_masked-tulip_contig_773_pilon_pilon-processed-gene-4.17-mRNA-1	XP_026744705.1 uncharacterized protein LOC113506043 [Trichoplusia ni]	XP_026744705.1	58.17	153	62	1	1	151	1	153	3e-58	192
maker-tulip_contig_773_pilon_pilon-augustus-gene-4.45-mRNA-1	XP_022832292.1 mitochondrial coenzyme A transporter SLC25A42 [Spodoptera litura]	XP_022832292.1	96	75	3	0	1	75	1	75	6e-42	147
augustus_masked-tulip_contig_773_pilon_pilon-processed-gene-4.18-mRNA-1	XP_022833677.1 E3 ubiquitin-protein ligase RFWD3-like [Spodoptera litura]	XP_022833677.1	89.95	577	50	1	1	569	1	577	0	1090
augustus_masked-tulip_contig_240_pilon_pilon-processed-gene-0.7-mRNA-1	PZC83421.1 hypothetical protein B5X24_HaOG207804 [Helicoverpa armigera]	PZC83421.1	44.98	558	264	10	5	537	17	556	6e-144	437
maker-tulip_contig_240_pilon_pilon-augustus-gene-0.1-mRNA-1	XP_022818713.1 uncharacterized protein LOC111351155 [Spodoptera litura]	XP_022818713.1	71.95	82	17	2	1	76	1	82	3e-26	103
maker-tulip_contig_240_pilon_pilon-augustus-gene-0.2-mRNA-1	XP_022818485.1 myrosinase 1-like [Spodoptera litura]	XP_022818485.1	74.7	83	21	0	2	84	214	296	1e-37	139
maker-tulip_contig_573_pilon_pilon-augustus-gene-0.5-mRNA-1	XP_022814854.1 xanthine dehydrogenase [Spodoptera litura]	XP_022814854.1	97.72	1271	29	0	9	1279	78	1348	0	2601
maker-tulip_contig_573_pilon_pilon-augustus-gene-0.7-mRNA-1	XP_022814746.1 uncharacterized protein LOC111348385 [Spodoptera litura]	XP_022814746.1	82.78	209	36	0	1	209	1	209	2e-101	322
maker-tulip_contig_573_pilon_pilon-augustus-gene-0.8-mRNA-1	XP_022814746.1 uncharacterized protein LOC111348385 [Spodoptera litura]	XP_022814746.1	87.04	548	70	1	1	548	279	825	0	949
maker-tulip_contig_573_pilon_pilon-augustus-gene-0.11-mRNA-1	XP_022814856.1 transport and Golgi organization protein 1-like isoform X2 [Spodoptera litura]	XP_022814856.1	88.41	785	43	3	1	738	356	1139	0	1222
maker-tulip_contig_573_pilon_pilon-augustus-gene-0.12-mRNA-1	XP_022814855.1 transport and Golgi organization protein 1-like isoform X1 [Spodoptera litura]	XP_022814855.1	71.74	453	77	8	1	409	1	446	0	569
maker-tulip_contig_812_pilon_pilon-augustus-gene-0.14-mRNA-1	PCG73265.1 hypothetical protein B5V51_14987 [Heliothis virescens]	PCG73265.1	75.41	61	13	1	42	102	421	479	1e-20	95.5
augustus_masked-tulip_contig_812_pilon_pilon-processed-gene-0.1-mRNA-1	XP_022825505.1 uncharacterized protein LOC111355702 [Spodoptera litura]	XP_022825505.1	65.7	277	95	0	11	287	1	277	3e-97	315
maker-tulip_contig_812_pilon_pilon-augustus-gene-0.15-mRNA-1	XP_022830889.1 ubiquitin carboxyl-terminal hydrolase 7-like [Spodoptera litura]	XP_022830889.1	91.58	487	10	1	1	456	1	487	0	930
augustus_masked-tulip_contig_812_pilon_pilon-processed-gene-0.4-mRNA-1	XP_022830606.1 protein asunder [Spodoptera litura]	XP_022830606.1	72.76	635	23	6	1	485	1	635	0	865
maker-tulip_contig_812_pilon_pilon-augustus-gene-0.19-mRNA-1	XP_022831305.1 mitochondrial uncoupling protein 4-like [Spodoptera litura]	XP_022831305.1	97.47	316	8	0	1	316	1	316	0	643
maker-tulip_contig_812_pilon_pilon-augustus-gene-0.21-mRNA-1	XP_026317500.1 LOW QUALITY PROTEIN: 40S ribosomal protein SA [Hyposmocoma kahamanoa]	XP_026317500.1	77.44	328	27	6	1	318	1	291	3e-166	474
maker-tulip_contig_812_pilon_pilon-augustus-gene-0.24-mRNA-1	XP_022831179.1 uncharacterized protein LOC111359777 [Spodoptera litura]	XP_022831179.1	84.97	346	32	1	7	332	1591	1936	0	601
augustus_masked-tulip_contig_812_pilon_pilon-processed-gene-0.8-mRNA-1	XP_022831179.1 uncharacterized protein LOC111359777 [Spodoptera litura]	XP_022831179.1	87.4	1452	183	0	87	1538	1	1452	0	2674
maker-tulip_contig_812_pilon_pilon-augustus-gene-0.31-mRNA-1	RVE45765.1 hypothetical protein evm_009565 [Chilo suppressalis]	RVE45765.1	44.73	731	314	11	37	722	26	711	0	612
maker-tulip_contig_812_pilon_pilon-augustus-gene-0.33-mRNA-1	XP_022831286.1 ubiquitin carboxyl-terminal hydrolase 7-like isoform X10 [Spodoptera litura]	XP_022831286.1	98.09	1154	8	1	1	1140	1	1154	0	2366
maker-tulip_contig_812_pilon_pilon-augustus-gene-0.39-mRNA-1	XP_022830607.1 uncharacterized protein LOC111359338 [Spodoptera litura]	XP_022830607.1	98.8	333	4	0	1	333	1	333	0	681
maker-tulip_contig_812_pilon_pilon-augustus-gene-0.42-mRNA-1	XP_022831308.1 protein enhancer of sevenless 2B [Spodoptera litura]	XP_022831308.1	100	191	0	0	1	191	1	191	1e-139	399
maker-tulip_contig_812_pilon_pilon-augustus-gene-0.30-mRNA-1	PCG79908.1 hypothetical protein B5V51_13249 [Heliothis virescens]	PCG79908.1	81.58	38	7	0	111	148	171	208	3e-15	77.4
augustus_masked-tulip_contig_812_pilon_pilon-processed-gene-1.2-mRNA-1	XP_022830522.1 uncharacterized protein LOC111359286 [Spodoptera litura]	XP_022830522.1	85.6	257	37	0	1	257	28	284	5e-152	436
augustus_masked-tulip_contig_812_pilon_pilon-processed-gene-1.3-mRNA-1	XP_026725667.1 formin-like protein 5 [Trichoplusia ni]	XP_026725667.1	100	169	0	0	1	169	1	169	6e-104	305
augustus_masked-tulip_contig_812_pilon_pilon-processed-gene-1.5-mRNA-1	PZC74825.1 hypothetical protein B5X24_HaOG207138 [Helicoverpa armigera]	PZC74825.1	41.54	260	127	5	1	245	31	280	1e-48	179
augustus_masked-tulip_contig_812_pilon_pilon-processed-gene-1.6-mRNA-1	PZC71600.1 hypothetical protein B5X24_HaOG212946 [Helicoverpa armigera]	PZC71600.1	50.25	394	145	4	2	347	229	619	5e-137	414
augustus_masked-tulip_contig_812_pilon_pilon-processed-gene-1.7-mRNA-1	XP_022830861.1 inactive rhomboid protein 1 isoform X2 [Spodoptera litura]	XP_022830861.1	99.63	538	2	0	11	548	412	949	0	1105
augustus_masked-tulip_contig_812_pilon_pilon-processed-gene-1.8-mRNA-1	XP_022831061.1 putative inorganic phosphate cotransporter [Spodoptera litura]	XP_022831061.1	83.37	517	18	3	1	449	1	517	0	854
maker-tulip_contig_812_pilon_pilon-augustus-gene-1.15-mRNA-1	XP_022830767.1 putative inorganic phosphate cotransporter [Spodoptera litura]	XP_022830767.1	94.8	519	27	0	1	519	1	519	0	1014
maker-tulip_contig_812_pilon_pilon-augustus-gene-1.22-mRNA-1	XP_022831018.1 SUN domain-containing protein 3-like [Spodoptera litura]	XP_022831018.1	89.58	336	33	1	12	347	30	363	0	628
maker-tulip_contig_812_pilon_pilon-augustus-gene-2.18-mRNA-1	XP_022830965.1 putative inorganic phosphate cotransporter [Spodoptera litura]	XP_022830965.1	98.62	508	7	0	1	508	1	508	0	1039
maker-tulip_contig_812_pilon_pilon-augustus-gene-2.23-mRNA-1	XP_022830909.1 putative inorganic phosphate cotransporter [Spodoptera litura]	XP_022830909.1	99.44	354	2	0	1	354	180	533	0	729
augustus_masked-tulip_contig_812_pilon_pilon-processed-gene-2.5-mRNA-1	XP_022831131.1 protein I'm not dead yet-like [Spodoptera litura]	XP_022831131.1	88.64	176	20	0	1	176	102	277	1e-102	321
maker-tulip_contig_812_pilon_pilon-augustus-gene-2.29-mRNA-1	XP_022831013.1 protein I'm not dead yet-like [Spodoptera litura]	XP_022831013.1	64.71	578	99	7	1	473	1	578	0	685
augustus_masked-tulip_contig_812_pilon_pilon-processed-gene-2.7-mRNA-1	PCG75768.1 hypothetical protein B5V51_11010, partial [Heliothis virescens]	PCG75768.1	64.37	87	27	1	2	84	5	91	7e-29	114
augustus_masked-tulip_contig_812_pilon_pilon-processed-gene-2.8-mRNA-1	XP_011551371.1 PREDICTED: uncharacterized protein LOC105383056 [Plutella xylostella]	XP_011551371.1	87.31	197	22	3	63	258	343	537	9e-105	350
maker-tulip_contig_812_pilon_pilon-augustus-gene-2.38-mRNA-1	XP_026734744.1 uncharacterized protein LOC113498798 [Trichoplusia ni]	XP_026734744.1	94.17	343	20	0	170	512	234	576	0	599
augustus_masked-tulip_contig_812_pilon_pilon-processed-gene-2.10-mRNA-1	XP_022823341.1 piggyBac transposable element-derived protein 3-like [Spodoptera litura]	XP_022823341.1	62.01	329	109	5	1	317	1	325	6e-137	403
augustus_masked-tulip_contig_812_pilon_pilon-processed-gene-2.11-mRNA-1	XP_022830900.1 coiled-coil domain-containing protein 96 [Spodoptera litura]	XP_022830900.1	70.35	199	49	2	1	189	1	199	2e-79	258
maker-tulip_contig_812_pilon_pilon-augustus-gene-2.41-mRNA-1	XP_022831138.1 uncharacterized protein LOC111359743 [Spodoptera litura]	XP_022831138.1	74.15	205	4	1	13	217	110	265	2e-98	297
maker-tulip_contig_812_pilon_pilon-augustus-gene-2.42-mRNA-1	PCG66175.1 hypothetical protein B5V51_8084 [Heliothis virescens]	PCG66175.1	45.38	487	176	6	39	444	63	540	3e-130	398
maker-tulip_contig_812_pilon_pilon-augustus-gene-2.44-mRNA-1	XP_022831068.1 uncharacterized protein LOC111359698 isoform X1 [Spodoptera litura]	XP_022831068.1	100	460	0	0	8	467	28	487	0	955
maker-tulip_contig_153_pilon_pilon-augustus-gene-0.4-mRNA-1	XP_022819743.1 uncharacterized protein LOC111351810 [Spodoptera litura]	XP_022819743.1	76.75	271	9	4	1	217	1	271	4e-135	390
augustus_masked-tulip_contig_153_pilon_pilon-processed-gene-0.1-mRNA-1	XP_026726774.1 uncharacterized protein LOC113493150 [Trichoplusia ni]	XP_026726774.1	58.12	542	194	13	5	530	9	533	0	585
augustus_masked-tulip_contig_153_pilon_pilon-processed-gene-0.3-mRNA-1	XP_022820123.1 uncharacterized protein LOC111352042 [Spodoptera litura]	XP_022820123.1	88.4	250	29	0	1	250	1	250	6e-162	459
maker-tulip_contig_153_pilon_pilon-augustus-gene-1.10-mRNA-1	XP_022820120.1 ras-related protein Rab-37-like isoform X2 [Spodoptera litura]	XP_022820120.1	98.85	262	3	0	1	262	1	262	0	543
maker-tulip_contig_153_pilon_pilon-augustus-gene-1.13-mRNA-1	XP_022819338.1 zinc finger protein 91-like [Spodoptera litura]	XP_022819338.1	97.16	1443	40	1	688	2130	149	1590	0	2959
maker-tulip_contig_153_pilon_pilon-augustus-gene-1.14-mRNA-1	RVE51909.1 hypothetical protein evm_003375 [Chilo suppressalis]	RVE51909.1	73.11	119	32	0	1	119	1	119	9e-57	186
maker-tulip_contig_153_pilon_pilon-augustus-gene-1.18-mRNA-1	XP_022819506.1 armadillo segment polarity protein isoform X2 [Spodoptera litura]	XP_022819506.1	96.22	793	2	1	1	765	1	793	0	1560
maker-tulip_contig_153_pilon_pilon-augustus-gene-1.19-mRNA-1	XP_022819594.1 protein Tob1 [Spodoptera litura]	XP_022819594.1	100	252	0	0	1	252	1	252	0	511
maker-tulip_contig_153_pilon_pilon-augustus-gene-1.20-mRNA-1	XP_022837599.1 uncharacterized protein LOC111364790 [Spodoptera litura]	XP_022837599.1	75.41	244	55	2	198	439	384	624	5e-126	390
maker-tulip_contig_153_pilon_pilon-augustus-gene-1.21-mRNA-1	XP_022820295.1 uncharacterized protein LOC111352161 [Spodoptera litura]	XP_022820295.1	74.19	461	90	3	50	482	44	503	0	708
augustus_masked-tulip_contig_186_pilon_pilon-processed-gene-0.13-mRNA-1	JAA84376.1 Uncharacterized protein, partial [Pararge aegeria]	JAA84376.1	82.39	142	25	0	163	304	1	142	1e-83	264
maker-tulip_contig_186_pilon_pilon-augustus-gene-0.0-mRNA-1	XP_022826130.1 uncharacterized protein LOC111356111 [Spodoptera litura]	XP_022826130.1	99.64	551	2	0	6	556	18	568	0	1137
maker-tulip_contig_186_pilon_pilon-augustus-gene-0.2-mRNA-1	XP_022826315.1 chromobox protein homolog 1-like isoform X2 [Spodoptera litura]	XP_022826315.1	92.74	234	14	2	37	270	1	231	3e-140	406
maker-tulip_contig_186_pilon_pilon-augustus-gene-0.6-mRNA-1	XP_022825776.1 uncharacterized protein LOC111355902 [Spodoptera litura]	XP_022825776.1	99.24	528	4	0	1	528	53	580	0	1079
maker-tulip_contig_186_pilon_pilon-augustus-gene-0.8-mRNA-1	XP_022826169.1 DNA-directed RNA polymerase I subunit RPA12 [Spodoptera litura]	XP_022826169.1	99.17	120	1	0	1	120	1	120	2e-83	249
augustus_masked-tulip_contig_186_pilon_pilon-processed-gene-0.20-mRNA-1	KOB59708.1 19.5g1 protein, partial [Operophtera brumata]	KOB59708.1	43.24	111	52	2	159	265	438	541	3e-08	61.6
augustus_masked-tulip_contig_186_pilon_pilon-processed-gene-0.21-mRNA-1	XP_013189681.1 PREDICTED: uncharacterized protein LOC106134232 [Amyelois transitella]	XP_013189681.1	63.82	340	122	1	1	340	1	339	5e-167	498
maker-tulip_contig_186_pilon_pilon-augustus-gene-0.10-mRNA-1	XP_022826083.1 tektin-B1-like [Spodoptera litura]	XP_022826083.1	91.29	425	11	1	1	399	1	425	0	775
maker-tulip_contig_186_pilon_pilon-augustus-gene-0.12-mRNA-1	PCG72138.1 hypothetical protein B5V51_1129 [Heliothis virescens]	PCG72138.1	78.79	66	14	0	104	169	1661	1726	3e-25	111
maker-tulip_contig_195_pilon_pilon-augustus-gene-0.18-mRNA-1	AYM00395.1 apoptotic protease-activating factor 1 [Spodoptera exigua]	AYM00395.1	96.23	1381	2	3	1	1331	1	1381	0	2720
maker-tulip_contig_195_pilon_pilon-augustus-gene-0.21-mRNA-1	XP_022827926.1 cell division cycle protein 20 homolog isoform X1 [Spodoptera litura]	XP_022827926.1	95.26	548	18	1	1	548	1	540	0	1082
maker-tulip_contig_195_pilon_pilon-augustus-gene-0.24-mRNA-1	ARD71213.1 acetyltransferase [Spodoptera exigua]	ARD71213.1	95.72	397	0	1	1	380	1	397	0	761
maker-tulip_contig_195_pilon_pilon-augustus-gene-0.26-mRNA-1	XP_022828079.1 uncharacterized protein LOC111357565 isoform X4 [Spodoptera litura]	XP_022828079.1	81.06	301	46	3	147	447	139	428	1e-160	471
maker-tulip_contig_195_pilon_pilon-augustus-gene-0.32-mRNA-1	XP_022827932.1 sodium- and chloride-dependent glycine transporter 1 isoform X2 [Spodoptera litura]	XP_022827932.1	93.44	1158	42	4	1	1125	1	1157	0	2100
maker-tulip_contig_195_pilon_pilon-augustus-gene-0.35-mRNA-1	XP_022827761.1 UDP-N-acetylglucosamine--peptide N-acetylglucosaminyltransferase 110 kDa subunit isoform X1 [Spodoptera litura]	XP_022827761.1	98.14	1078	3	1	1	1078	1	1061	0	2198
augustus_masked-tulip_contig_195_pilon_pilon-processed-gene-0.9-mRNA-1	XP_022828030.1 toll-like receptor 7 [Spodoptera litura]	XP_022828030.1	99.44	1246	7	0	1	1246	8	1253	0	2542
augustus_masked-tulip_contig_195_pilon_pilon-processed-gene-0.10-mRNA-1	XP_022823532.1 uncharacterized protein LOC111354340 [Spodoptera litura]	XP_022823532.1	97.27	110	3	0	1	110	1	110	8e-68	216
augustus_masked-tulip_contig_195_pilon_pilon-processed-gene-0.12-mRNA-1	XP_022827978.1 toll-like receptor 6 [Spodoptera litura]	XP_022827978.1	99.63	1338	5	0	1	1338	4	1341	0	2761
augustus_masked-tulip_contig_195_pilon_pilon-processed-gene-0.13-mRNA-1	XP_022828074.1 protein inturned [Spodoptera litura]	XP_022828074.1	87.26	620	37	2	1	578	1	620	0	1082
augustus_masked-tulip_contig_195_pilon_pilon-processed-gene-0.14-mRNA-1	XP_022828001.1 uncharacterized protein LOC111357501 [Spodoptera litura]	XP_022828001.1	91.69	301	25	0	1	301	1	301	0	575
augustus_masked-tulip_contig_195_pilon_pilon-processed-gene-0.15-mRNA-1	XP_022828362.1 exportin-4-like [Spodoptera litura]	XP_022828362.1	89.17	637	17	1	1	585	1	637	0	1146
maker-tulip_contig_195_pilon_pilon-augustus-gene-0.43-mRNA-1	AIN34682.1 fatty alcohol acetyltransferase [Agrotis segetum]	AIN34682.1	89.98	509	51	0	1	509	1	509	0	971
augustus_masked-tulip_contig_596_pilon_pilon-processed-gene-0.0-mRNA-1	XP_022826748.1 fasciclin-2-like isoform X2 [Spodoptera litura]	XP_022826748.1	85.09	409	34	2	1	382	301	709	0	662
maker-tulip_contig_596_pilon_pilon-augustus-gene-0.4-mRNA-1	AXY04259.1 insulin-like peptide 1 [Spodoptera exigua]	AXY04259.1	69.77	172	31	2	1	151	1	172	2e-74	230
maker-tulip_contig_596_pilon_pilon-augustus-gene-0.7-mRNA-1	XP_022823164.1 lysozyme-like [Spodoptera litura]	XP_022823164.1	93.57	140	9	0	34	173	23	162	8e-95	282
maker-tulip_contig_171_pilon_pilon-augustus-gene-0.2-mRNA-1	XP_021186498.1 uncharacterized protein LOC110373525 [Helicoverpa armigera]	XP_021186498.1	86.89	122	16	0	97	218	57	178	1e-63	226
augustus_masked-tulip_contig_171_pilon_pilon-processed-gene-0.5-mRNA-1	XP_022835466.1 extensin-1-like [Spodoptera litura]	XP_022835466.1	55.81	43	16	1	30	69	117	159	2e-06	50.1
maker-tulip_contig_171_pilon_pilon-augustus-gene-0.0-mRNA-1	XP_022834775.1 trypsin-1-like [Spodoptera litura]	XP_022834775.1	80.7	57	11	0	11	67	308	364	9e-21	91.3
augustus_masked-tulip_contig_446_pilon_pilon-processed-gene-0.21-mRNA-1	XP_022823576.1 hemicentin-2-like isoform X1 [Spodoptera litura]	XP_022823576.1	60.56	1075	295	18	367	1330	946	2002	0	1205
maker-tulip_contig_446_pilon_pilon-augustus-gene-0.4-mRNA-1	XP_022823576.1 hemicentin-2-like isoform X1 [Spodoptera litura]	XP_022823576.1	47.85	930	407	27	56	950	1123	2009	0	738
maker-tulip_contig_446_pilon_pilon-augustus-gene-0.6-mRNA-1	PCG79969.1 hypothetical protein B5V51_12882 [Heliothis virescens]	PCG79969.1	70.11	3667	387	48	1	3001	31	3654	0	4053
augustus_masked-tulip_contig_446_pilon_pilon-processed-gene-0.24-mRNA-1	XP_023244283.1 uncharacterized protein LOC111642217 [Centruroides sculpturatus]	XP_023244283.1	81.15	191	36	0	1	191	111	301	1e-107	321
augustus_masked-tulip_contig_446_pilon_pilon-processed-gene-0.25-mRNA-1	PZC86882.1 hypothetical protein B5X24_HaOG201741 [Helicoverpa armigera]	PZC86882.1	39.5	119	61	3	7	116	49	165	4e-11	67
maker-tulip_contig_446_pilon_pilon-augustus-gene-0.10-mRNA-1	XP_022835370.1 hemicentin-1-like isoform X2 [Spodoptera litura]	XP_022835370.1	76.81	1462	280	3	1	1406	1	1459	0	2301
maker-tulip_contig_446_pilon_pilon-augustus-gene-0.15-mRNA-1	XP_022823933.1 hemicentin-1-like [Spodoptera litura]	XP_022823933.1	83.06	803	122	2	64	853	3	804	0	1408
augustus_masked-tulip_contig_446_pilon_pilon-processed-gene-0.29-mRNA-1	PCG69158.1 hypothetical protein B5V51_4448 [Heliothis virescens]	PCG69158.1	67.83	115	26	3	1	106	1	113	5e-35	135
augustus_masked-tulip_contig_446_pilon_pilon-processed-gene-0.30-mRNA-1	ASO98050.1 cytochrome p450 CYP301B1 [Spodoptera exigua]	ASO98050.1	99.76	418	1	0	1	418	120	537	0	876
augustus_masked-tulip_contig_446_pilon_pilon-processed-gene-1.41-mRNA-1	XP_022823611.1 uncharacterized protein LOC111354400 [Spodoptera litura]	XP_022823611.1	84.06	207	16	2	1	191	24	229	2e-121	353
augustus_masked-tulip_contig_446_pilon_pilon-processed-gene-1.42-mRNA-1	XP_022823818.1 gastric triacylglycerol lipase-like [Spodoptera litura]	XP_022823818.1	89.2	435	47	0	1	435	71	505	0	834
maker-tulip_contig_446_pilon_pilon-augustus-gene-1.1-mRNA-1	XP_022823656.1 small integral membrane protein 20 [Spodoptera litura]	XP_022823656.1	94.74	76	4	0	1	76	1	76	5e-47	153
maker-tulip_contig_446_pilon_pilon-augustus-gene-1.3-mRNA-1	XP_022823665.1 uncharacterized protein LOC111354436 [Spodoptera litura]	XP_022823665.1	89.45	199	7	1	1	185	23	221	9e-126	363
augustus_masked-tulip_contig_446_pilon_pilon-processed-gene-1.45-mRNA-1	XP_022823655.1 uncharacterized protein LOC111354429 [Spodoptera litura]	XP_022823655.1	87.78	401	49	0	1	401	3	403	0	756
maker-tulip_contig_446_pilon_pilon-augustus-gene-1.4-mRNA-1	PCG72288.1 hypothetical protein B5V51_956 [Heliothis virescens]	PCG72288.1	34.24	257	105	10	1	247	1	203	5e-20	97.4
augustus_masked-tulip_contig_446_pilon_pilon-processed-gene-1.47-mRNA-1	XP_022823635.1 uncharacterized protein LOC111354414 [Spodoptera litura]	XP_022823635.1	98.44	1347	19	1	1	1347	137	1481	0	2662
maker-tulip_contig_446_pilon_pilon-augustus-gene-1.7-mRNA-1	XP_022823507.1 NEDD4 family-interacting protein 1-like [Spodoptera litura]	XP_022823507.1	99.2	125	1	0	4	128	2	126	5e-85	259
maker-tulip_contig_446_pilon_pilon-augustus-gene-1.9-mRNA-1	XP_026753319.1 uncharacterized protein LOC113513527 [Galleria mellonella]	XP_026753319.1	45.42	1015	500	14	95	1081	230	1218	0	883
maker-tulip_contig_446_pilon_pilon-augustus-gene-1.12-mRNA-1	XP_022823711.1 multidrug resistance protein homolog 49-like [Spodoptera litura]	XP_022823711.1	89.98	988	98	1	1	988	343	1329	0	1777
maker-tulip_contig_446_pilon_pilon-augustus-gene-1.15-mRNA-1	XP_022823839.1 AN1-type zinc finger protein 2A [Spodoptera litura]	XP_022823839.1	95.45	198	9	0	1	198	31	228	6e-136	390
maker-tulip_contig_446_pilon_pilon-augustus-gene-1.16-mRNA-1	XP_022823584.1 telomere length and silencing protein 1 homolog [Spodoptera litura]	XP_022823584.1	94.74	304	16	0	1	304	1	304	0	597
augustus_masked-tulip_contig_446_pilon_pilon-processed-gene-1.54-mRNA-1	RVE41195.1 hypothetical protein evm_014151 [Chilo suppressalis]	RVE41195.1	51.3	115	55	1	4	118	5	118	9e-31	122
augustus_masked-tulip_contig_446_pilon_pilon-processed-gene-1.55-mRNA-1	XP_013198810.1 PREDICTED: uncharacterized protein LOC106141722 [Amyelois transitella]	XP_013198810.1	94.35	124	7	0	117	240	3	126	2e-76	241
maker-tulip_contig_446_pilon_pilon-augustus-gene-1.18-mRNA-1	AGU36304.1 cytochrome P450 CYP301A1 [Spodoptera littoralis]	AGU36304.1	97.75	89	2	0	1	89	252	340	9e-55	182
maker-tulip_contig_446_pilon_pilon-augustus-gene-1.19-mRNA-1	ASO98049.1 cytochrome p450 CYP301A1 [Spodoptera exigua]	ASO98049.1	94.35	248	9	1	8	255	160	402	9e-164	474
maker-tulip_contig_446_pilon_pilon-augustus-gene-1.20-mRNA-1	XP_022823603.1 GDP-D-glucose phosphorylase 1 [Spodoptera litura]	XP_022823603.1	77.92	317	42	4	1	297	1	309	7e-175	497
maker-tulip_contig_446_pilon_pilon-augustus-gene-1.22-mRNA-1	XP_022823535.1 WD repeat domain phosphoinositide-interacting protein 4-like [Spodoptera litura]	XP_022823535.1	85.71	182	26	0	28	209	107	288	1e-112	335
maker-tulip_contig_446_pilon_pilon-augustus-gene-1.23-mRNA-1	PCG66981.1 hypothetical protein B5V51_7000 [Heliothis virescens]	PCG66981.1	80.43	46	9	0	1	46	1	46	7e-19	85.5
augustus_masked-tulip_contig_446_pilon_pilon-processed-gene-1.58-mRNA-1	PCG72287.1 hypothetical protein B5V51_955 [Heliothis virescens]	PCG72287.1	77.1	297	14	2	2	244	145	441	3e-152	441
augustus_masked-tulip_contig_446_pilon_pilon-processed-gene-1.60-mRNA-1	XP_022823600.1 DNA topoisomerase 3-beta-1 [Spodoptera litura]	XP_022823600.1	84.42	629	16	4	1	555	1	621	0	1066
maker-tulip_contig_446_pilon_pilon-augustus-gene-1.29-mRNA-1	XP_022823591.1 probable pyruvate dehydrogenase E1 component subunit alpha, mitochondrial [Spodoptera litura]	XP_022823591.1	97.46	118	3	0	12	129	282	399	2e-76	241
maker-tulip_contig_446_pilon_pilon-augustus-gene-1.30-mRNA-1	XP_022823591.1 probable pyruvate dehydrogenase E1 component subunit alpha, mitochondrial [Spodoptera litura]	XP_022823591.1	97.85	233	5	0	1	233	1	233	4e-165	473
maker-tulip_contig_446_pilon_pilon-augustus-gene-1.35-mRNA-1	XP_022823704.1 malate synthase, glyoxysomal-like [Spodoptera litura]	XP_022823704.1	97.56	82	2	0	58	139	464	545	2e-48	172
maker-tulip_contig_446_pilon_pilon-augustus-gene-1.36-mRNA-1	XP_022823704.1 malate synthase, glyoxysomal-like [Spodoptera litura]	XP_022823704.1	95.36	280	13	0	6	285	5	284	0	564
augustus_masked-tulip_contig_446_pilon_pilon-processed-gene-1.65-mRNA-1	RVE45245.1 hypothetical protein evm_010135 [Chilo suppressalis]	RVE45245.1	57.66	137	57	1	37	173	252	387	2e-48	172
augustus_masked-tulip_contig_446_pilon_pilon-processed-gene-1.66-mRNA-1	PNF39635.1 hypothetical protein B7P43_G05676 [Cryptotermes secundus]	PNF39635.1	33.01	206	89	5	74	279	35	191	2e-24	107
augustus_masked-tulip_contig_446_pilon_pilon-processed-gene-1.67-mRNA-1	XP_026330934.1 uncharacterized protein LOC113238311 [Hyposmocoma kahamanoa]	XP_026330934.1	38.94	226	108	4	3	198	2	227	8e-38	140
augustus_masked-tulip_contig_228_pilon_pilon-processed-gene-0.0-mRNA-1	XP_026746638.1 uncharacterized protein LOC113507901 isoform X1 [Trichoplusia ni]	XP_026746638.1	44.35	469	219	8	16	484	18	444	4e-127	392
maker-tulip_contig_228_pilon_pilon-augustus-gene-0.6-mRNA-1	XP_022837659.1 leptin receptor gene-related protein [Spodoptera litura]	XP_022837659.1	97.58	124	3	0	9	132	6	129	1e-80	243
augustus_masked-tulip_contig_228_pilon_pilon-processed-gene-0.2-mRNA-1	ALA09392.1 actin [Spodoptera frugiperda]	ALA09392.1	100	418	0	0	1	418	1	418	0	872
augustus_masked-tulip_contig_228_pilon_pilon-processed-gene-0.4-mRNA-1	XP_022837239.1 uncharacterized protein LOC111364562 [Spodoptera litura]	XP_022837239.1	98.5	133	2	0	14	146	60	192	5e-88	287
maker-tulip_contig_228_pilon_pilon-augustus-gene-0.9-mRNA-1	XP_021182082.1 DNA-directed RNA polymerases I, II, and III subunit RPABC1 [Helicoverpa armigera]	XP_021182082.1	90.53	190	0	1	1	172	1	190	6e-120	347
maker-tulip_contig_228_pilon_pilon-augustus-gene-1.28-mRNA-1	XP_022816568.1 Down syndrome cell adhesion molecule-like protein Dscam2 [Spodoptera litura]	XP_022816568.1	92.86	70	5	0	1	70	69	138	4e-38	144
augustus_masked-tulip_contig_228_pilon_pilon-processed-gene-1.1-mRNA-1	XP_021182047.1 Down syndrome cell adhesion molecule-like protein Dscam2 [Helicoverpa armigera]	XP_021182047.1	99.23	389	3	0	4	392	477	865	0	806
maker-tulip_contig_228_pilon_pilon-augustus-gene-1.31-mRNA-1	XP_013187436.1 PREDICTED: Down syndrome cell adhesion molecule-like protein Dscam2 [Amyelois transitella]	XP_013187436.1	68.93	988	172	13	8	914	1041	1974	0	1271
augustus_masked-tulip_contig_228_pilon_pilon-processed-gene-1.3-mRNA-1	XP_022833978.1 negative elongation factor B [Spodoptera litura]	XP_022833978.1	99.83	587	1	0	1	587	1	587	0	1205
maker-tulip_contig_228_pilon_pilon-augustus-gene-1.38-mRNA-1	XP_022835167.1 farnesyl pyrophosphate synthase-like [Spodoptera litura]	XP_022835167.1	99.07	428	4	0	1	428	2	429	0	892
maker-tulip_contig_228_pilon_pilon-augustus-gene-1.39-mRNA-1	XP_022835273.1 farnesyl pyrophosphate synthase-like [Spodoptera litura]	XP_022835273.1	87.89	388	47	0	1	388	1	388	0	733
maker-tulip_contig_228_pilon_pilon-augustus-gene-1.40-mRNA-1	XP_022837533.1 farnesyl pyrophosphate synthase 1-like [Spodoptera litura]	XP_022837533.1	97.44	195	5	0	1	195	1	195	1e-136	402
maker-tulip_contig_228_pilon_pilon-augustus-gene-1.53-mRNA-1	XP_021182198.1 farnesyl pyrophosphate synthase 1-like isoform X2 [Helicoverpa armigera]	XP_021182198.1	53.08	292	135	1	37	326	1	292	1e-114	344
maker-tulip_contig_228_pilon_pilon-augustus-gene-1.54-mRNA-1	XP_022816546.1 uncharacterized protein LOC111349610 [Spodoptera litura]	XP_022816546.1	82.53	292	51	0	1	292	467	758	6e-178	520
maker-tulip_contig_228_pilon_pilon-augustus-gene-1.55-mRNA-1	XP_022815155.1 farnesyl pyrophosphate synthase 2-like [Spodoptera litura]	XP_022815155.1	76.78	379	41	1	1	332	1	379	0	595
maker-tulip_contig_228_pilon_pilon-augustus-gene-1.56-mRNA-1	XP_021182133.1 ras-related protein Rab-2A [Helicoverpa armigera]	XP_021182133.1	100	214	0	0	1	214	1	214	4e-156	441
augustus_masked-tulip_contig_228_pilon_pilon-processed-gene-1.11-mRNA-1	XP_022816535.1 peroxisomal multifunctional enzyme type 2-like [Spodoptera litura]	XP_022816535.1	93.28	238	9	1	290	520	680	917	2e-143	445
augustus_masked-tulip_contig_228_pilon_pilon-processed-gene-1.12-mRNA-1	XP_022823988.1 uncharacterized protein LOC111354683 [Spodoptera litura]	XP_022823988.1	88.89	144	16	0	85	228	20	163	2e-87	266
augustus_masked-tulip_contig_228_pilon_pilon-processed-gene-1.13-mRNA-1	XP_022814260.1 growth arrest-specific protein 1-like [Spodoptera litura]	XP_022814260.1	88.83	179	18	1	23	199	63	241	2e-109	323
maker-tulip_contig_228_pilon_pilon-augustus-gene-1.81-mRNA-1	XP_026744708.1 uncharacterized protein LOC113506049 [Trichoplusia ni]	XP_026744708.1	60.42	283	99	4	1	271	54	335	2e-104	334
augustus_masked-tulip_contig_228_pilon_pilon-processed-gene-1.15-mRNA-1	XP_022815632.1 CWF19-like protein 1 [Spodoptera litura]	XP_022815632.1	89.83	531	22	2	3	501	2	532	0	986
maker-tulip_contig_228_pilon_pilon-augustus-gene-1.87-mRNA-1	XP_022833709.1 uncharacterized protein LOC111361362 isoform X4 [Spodoptera litura]	XP_022833709.1	97.41	1426	24	4	13	1430	51	1471	0	2790
augustus_masked-tulip_contig_228_pilon_pilon-processed-gene-1.17-mRNA-1	XP_022837545.1 farnesyl pyrophosphate synthase 2-like [Spodoptera litura]	XP_022837545.1	67.91	374	73	1	5	331	16	389	0	520
maker-tulip_contig_228_pilon_pilon-augustus-gene-1.92-mRNA-1	XP_022816851.1 uncharacterized protein LOC111349829 [Spodoptera litura]	XP_022816851.1	86.61	687	42	2	11	647	11	697	0	1183
maker-tulip_contig_228_pilon_pilon-augustus-gene-1.93-mRNA-1	XP_022831493.1 uncharacterized protein LOC111359952 [Spodoptera litura]	XP_022831493.1	86.73	309	21	1	1	289	1	309	0	548
augustus_masked-tulip_contig_228_pilon_pilon-processed-gene-1.20-mRNA-1	JAV64083.1 hypothetical protein [Photinus pyralis]	JAV64083.1	55.13	263	64	2	1	210	4	265	2e-98	296
augustus_masked-tulip_contig_228_pilon_pilon-processed-gene-1.22-mRNA-1	JAV64084.1 hypothetical protein, partial [Photinus pyralis]	JAV64084.1	50.34	147	68	2	1	147	20	161	2e-40	142
augustus_masked-tulip_contig_228_pilon_pilon-processed-gene-1.23-mRNA-1	PCG64700.1 hypothetical protein B5V51_10268 [Heliothis virescens]	PCG64700.1	64.62	195	17	1	30	172	221	415	2e-72	234
augustus_masked-tulip_contig_228_pilon_pilon-processed-gene-1.24-mRNA-1	EFA11822.1 hypothetical protein TcasGA2_TC005055 [Tribolium castaneum]	EFA11822.1	58.42	190	72	1	178	360	27	216	1e-74	240
augustus_masked-tulip_contig_228_pilon_pilon-processed-gene-1.25-mRNA-1	XP_022815827.1 uncharacterized protein LOC111349084 [Spodoptera litura]	XP_022815827.1	95.81	167	7	0	1	167	256	422	8e-108	332
augustus_masked-tulip_contig_228_pilon_pilon-processed-gene-1.26-mRNA-1	XP_022815827.1 uncharacterized protein LOC111349084 [Spodoptera litura]	XP_022815827.1	93.33	120	8	0	1	120	15	134	6e-72	236
maker-tulip_contig_228_pilon_pilon-augustus-gene-1.101-mRNA-1	XP_023945409.1 protein ALP1-like [Bicyclus anynana]	XP_023945409.1	86.76	272	7	1	2	244	16	287	3e-170	484
maker-tulip_contig_228_pilon_pilon-augustus-gene-1.30-mRNA-1	XP_026492995.1 Down syndrome cell adhesion molecule-like protein Dscam2 isoform X5 [Vanessa tameamea]	XP_026492995.1	89.66	58	6	0	18	75	829	886	2e-28	116
maker-tulip_contig_282_pilon_pilon-augustus-gene-0.6-mRNA-1	XP_022824908.1 protein unc-13 homolog A isoform X6 [Spodoptera litura]	XP_022824908.1	90.54	613	32	3	1	587	1	613	0	1124
maker-tulip_contig_282_pilon_pilon-augustus-gene-0.7-mRNA-1	XP_022824906.1 protein unc-13 homolog A isoform X4 [Spodoptera litura]	XP_022824906.1	94.61	1038	22	3	1	1025	633	1649	0	2006
maker-tulip_contig_282_pilon_pilon-augustus-gene-0.8-mRNA-1	XP_026741232.1 protein unc-13 homolog A isoform X3 [Trichoplusia ni]	XP_026741232.1	98.97	194	2	0	1	194	1695	1888	2e-126	403
maker-tulip_contig_744_pilon_pilon-augustus-gene-0.4-mRNA-1	XP_022832341.1 endoribonuclease Dcr-1 [Spodoptera litura]	XP_022832341.1	79.13	2104	270	20	1	1965	97	2170	0	3239
maker-tulip_contig_689_pilon_pilon-augustus-gene-0.12-mRNA-1	XP_022820969.1 Krueppel-like factor 13 [Spodoptera litura]	XP_022820969.1	96.18	340	8	2	1	335	1	340	0	649
maker-tulip_contig_689_pilon_pilon-augustus-gene-0.14-mRNA-1	XP_026746945.1 cytoplasmic dynein 1 light intermediate chain 2-like [Trichoplusia ni]	XP_026746945.1	98.73	157	2	0	1	157	1	157	6e-108	315
augustus_masked-tulip_contig_689_pilon_pilon-processed-gene-0.4-mRNA-1	XP_022820448.1 cytoplasmic dynein 1 light intermediate chain 2 [Spodoptera litura]	XP_022820448.1	83.45	290	1	1	4	246	157	446	3e-147	430
maker-tulip_contig_689_pilon_pilon-augustus-gene-0.17-mRNA-1	XP_022820505.1 endonuclease/exonuclease/phosphatase family domain-containing protein 1-like isoform X1 [Spodoptera litura]	XP_022820505.1	98.45	323	3	1	1	321	6	328	0	650
augustus_masked-tulip_contig_689_pilon_pilon-processed-gene-0.6-mRNA-1	XP_022815760.1 uncharacterized protein LOC111349031 [Spodoptera litura]	XP_022815760.1	86.49	74	10	0	31	104	1	74	7e-38	144
maker-tulip_contig_689_pilon_pilon-augustus-gene-0.18-mRNA-1	XP_022821049.1 uncharacterized protein LOC111352672 [Spodoptera litura]	XP_022821049.1	84.66	163	25	0	1	163	1	163	5e-95	285
maker-tulip_contig_689_pilon_pilon-augustus-gene-0.19-mRNA-1	XP_022820761.1 coiled-coil and C2 domain-containing protein 1-like isoform X2 [Spodoptera litura]	XP_022820761.1	81.36	794	57	6	1	708	1	789	0	1073
maker-tulip_contig_689_pilon_pilon-augustus-gene-0.21-mRNA-1	XP_022820693.1 maestro heat-like repeat-containing protein family member 1 [Spodoptera litura]	XP_022820693.1	98.09	1101	21	0	1	1101	1	1101	0	2214
augustus_masked-tulip_contig_689_pilon_pilon-processed-gene-1.0-mRNA-1	PCG80409.1 hypothetical protein B5V51_8040 [Heliothis virescens]	PCG80409.1	89.92	119	8	3	1	116	1	118	3e-64	215
augustus_masked-tulip_contig_689_pilon_pilon-processed-gene-1.1-mRNA-1	PZC80281.1 hypothetical protein B5X24_HaOG214980 [Helicoverpa armigera]	PZC80281.1	100	69	0	0	8	76	3	71	2e-42	144
augustus_masked-tulip_contig_689_pilon_pilon-processed-gene-1.2-mRNA-1	XP_021187197.1 TBC1 domain family member 24 isoform X5 [Helicoverpa armigera]	XP_021187197.1	82.09	402	15	2	50	398	163	560	0	668
augustus_masked-tulip_contig_689_pilon_pilon-processed-gene-1.3-mRNA-1	XP_022820827.1 LOW QUALITY PROTEIN: protein asteroid [Spodoptera litura]	XP_022820827.1	83.96	773	103	3	1	772	1	753	0	1237
augustus_masked-tulip_contig_689_pilon_pilon-processed-gene-1.6-mRNA-1	XP_022821111.1 uncharacterized protein LOC111352722 [Spodoptera litura]	XP_022821111.1	69.38	405	121	1	3	404	2	406	0	549
augustus_masked-tulip_contig_689_pilon_pilon-processed-gene-1.7-mRNA-1	XP_022820594.1 uncharacterized protein LOC111352352 [Spodoptera litura]	XP_022820594.1	59.09	264	76	7	1	260	1	236	8e-88	273
maker-tulip_contig_689_pilon_pilon-augustus-gene-1.17-mRNA-1	XP_022820976.1 la protein homolog [Spodoptera litura]	XP_022820976.1	93.68	380	11	1	1	367	1	380	0	719
maker-tulip_contig_689_pilon_pilon-augustus-gene-1.27-mRNA-1	XP_022820828.1 androgen-dependent TFPI-regulating protein-like [Spodoptera litura]	XP_022820828.1	96.58	234	8	0	1	234	1	234	6e-164	462
maker-tulip_contig_689_pilon_pilon-augustus-gene-1.28-mRNA-1	AEK20823.1 caspase-3 [Spodoptera exigua]	AEK20823.1	98.58	281	4	0	1	281	1	281	0	582
maker-tulip_contig_689_pilon_pilon-augustus-gene-1.31-mRNA-1	XP_022820379.1 RNA pseudouridylate synthase domain-containing protein 2-like isoform X2 [Spodoptera litura]	XP_022820379.1	97.78	405	3	1	8	412	255	653	0	815
maker-tulip_contig_689_pilon_pilon-augustus-gene-1.32-mRNA-1	PZC80271.1 hypothetical protein B5X24_HaOG214970 [Helicoverpa armigera]	PZC80271.1	100	137	0	0	45	181	141	277	4e-94	285
augustus_masked-tulip_contig_689_pilon_pilon-processed-gene-3.1-mRNA-1	XP_022820404.1 zinc finger protein 629 [Spodoptera litura]	XP_022820404.1	97.74	221	2	1	12	232	89	306	2e-147	430
maker-tulip_contig_689_pilon_pilon-augustus-gene-3.8-mRNA-1	XP_021187210.1 zinc finger protein Gfi-1b-like [Helicoverpa armigera]	XP_021187210.1	90.7	129	11	1	7	135	1	128	2e-79	240
maker-tulip_contig_689_pilon_pilon-augustus-gene-3.9-mRNA-1	XP_022820485.1 HEAT repeat-containing protein 1 [Spodoptera litura]	XP_022820485.1	94.33	2098	118	1	1	2098	1	2097	0	4014
maker-tulip_contig_689_pilon_pilon-augustus-gene-3.11-mRNA-1	XP_022821095.1 esterase FE4-like [Spodoptera litura]	XP_022821095.1	85.37	492	72	0	1	492	1	492	0	893
augustus_masked-tulip_contig_689_pilon_pilon-processed-gene-3.5-mRNA-1	XP_022820377.1 RNA pseudouridylate synthase domain-containing protein 2-like isoform X1 [Spodoptera litura]	XP_022820377.1	90.22	92	9	0	1	92	31	122	6e-51	177
augustus_masked-tulip_contig_689_pilon_pilon-processed-gene-3.7-mRNA-1	XP_022820849.1 uncharacterized protein LOC111352537 [Spodoptera litura]	XP_022820849.1	99.18	122	1	0	1	122	1	122	5e-83	248
maker-tulip_contig_689_pilon_pilon-augustus-gene-3.13-mRNA-1	PZC80263.1 hypothetical protein B5X24_HaOG214962 [Helicoverpa armigera]	PZC80263.1	82.26	62	1	1	1	52	1	62	2e-24	99
maker-tulip_contig_689_pilon_pilon-augustus-gene-4.18-mRNA-1	XP_022821031.1 tribbles homolog 2-like [Spodoptera litura]	XP_022821031.1	100	198	0	0	1	198	1	198	8e-138	399
maker-tulip_contig_689_pilon_pilon-augustus-gene-4.19-mRNA-1	XP_022820450.1 beta-lactamase-like protein 2 homolog [Spodoptera litura]	XP_022820450.1	92.83	293	21	0	1	293	1	293	0	568
maker-tulip_contig_689_pilon_pilon-augustus-gene-4.22-mRNA-1	XP_023944885.1 zinc finger BED domain-containing protein 4 [Bicyclus anynana]	XP_023944885.1	49.6	623	284	6	1	611	1	605	0	615
maker-tulip_contig_689_pilon_pilon-augustus-gene-4.24-mRNA-1	XP_022820358.1 carboxy-terminal domain RNA polymerase II polypeptide A small phosphatase 1 [Spodoptera litura]	XP_022820358.1	67.68	164	0	1	1	111	135	298	3e-63	203
maker-tulip_contig_689_pilon_pilon-augustus-gene-4.25-mRNA-1	PCG64567.1 hypothetical protein B5V51_10466 [Heliothis virescens]	PCG64567.1	93.18	337	2	1	1	316	1	337	0	642
augustus_masked-tulip_contig_689_pilon_pilon-processed-gene-4.10-mRNA-1	XP_022821010.1 uncharacterized protein LOC111352646 [Spodoptera litura]	XP_022821010.1	93.71	159	10	0	55	213	27	185	4e-101	311
maker-tulip_contig_689_pilon_pilon-augustus-gene-4.28-mRNA-1	XP_022820789.1 transcription initiation factor IIB [Spodoptera litura]	XP_022820789.1	93.87	310	0	1	12	302	6	315	0	589
maker-tulip_contig_689_pilon_pilon-augustus-gene-4.30-mRNA-1	XP_022820449.1 NADH dehydrogenase [ubiquinone] flavoprotein 1, mitochondrial [Spodoptera litura]	XP_022820449.1	95.44	482	22	0	1	482	1	482	0	933
maker-tulip_contig_689_pilon_pilon-augustus-gene-4.33-mRNA-1	XP_022820846.1 mRNA-capping enzyme isoform X1 [Spodoptera litura]	XP_022820846.1	75.21	589	45	5	1	488	1	589	0	867
augustus_masked-tulip_contig_689_pilon_pilon-processed-gene-4.15-mRNA-1	XP_022837599.1 uncharacterized protein LOC111364790 [Spodoptera litura]	XP_022837599.1	76.8	556	113	7	1	545	1	551	0	808
maker-tulip_contig_689_pilon_pilon-augustus-gene-4.44-mRNA-1	XP_022820871.1 alsin [Spodoptera litura]	XP_022820871.1	97.37	1407	37	0	1	1407	2	1408	0	2872
maker-tulip_contig_689_pilon_pilon-augustus-gene-4.47-mRNA-1	XP_021182839.1 homeobox protein aristaless-like [Helicoverpa armigera]	XP_021182839.1	98.87	266	3	0	1	266	92	357	0	531
maker-tulip_contig_175_pilon_pilon-augustus-gene-0.11-mRNA-1	PCG78498.1 hypothetical protein B5V51_3958 [Heliothis virescens]	PCG78498.1	92.83	293	21	0	1	293	1	293	0	577
maker-tulip_contig_175_pilon_pilon-augustus-gene-0.16-mRNA-1	ADL27731.1 gloverin [Spodoptera exigua]	ADL27731.1	87.43	175	2	1	1	155	1	175	2e-105	309
augustus_masked-tulip_contig_175_pilon_pilon-processed-gene-0.6-mRNA-1	PZC84314.1 hypothetical protein B5X24_HaOG205509 [Helicoverpa armigera]	PZC84314.1	96.47	170	6	0	1	170	1	170	2e-115	334
augustus_masked-tulip_contig_175_pilon_pilon-processed-gene-0.7-mRNA-1	PCG78497.1 hypothetical protein B5V51_3957 [Heliothis virescens]	PCG78497.1	75.68	111	27	0	1	111	1	111	9e-58	183
augustus_masked-tulip_contig_175_pilon_pilon-processed-gene-0.8-mRNA-1	XP_021186669.1 uncharacterized protein LOC110373661 [Helicoverpa armigera]	XP_021186669.1	59.51	163	65	1	1	163	24	185	7e-65	214
augustus_masked-tulip_contig_175_pilon_pilon-processed-gene-0.9-mRNA-1	PCG73264.1 hypothetical protein B5V51_14987 [Heliothis virescens]	PCG73264.1	79.46	112	21	1	38	149	370	479	7e-51	182
augustus_masked-tulip_contig_175_pilon_pilon-processed-gene-0.10-mRNA-1	PCG70774.1 hypothetical protein B5V51_2601 [Heliothis virescens]	PCG70774.1	68.38	117	32	2	1	112	1	117	2e-39	137
maker-tulip_contig_175_pilon_pilon-augustus-gene-1.0-mRNA-1	XP_022837434.1 Down syndrome cell adhesion molecule-like protein Dscam2 isoform X2 [Spodoptera litura]	XP_022837434.1	80.45	404	20	3	1	345	155	558	0	634
maker-tulip_contig_175_pilon_pilon-augustus-gene-1.1-mRNA-1	XP_022837433.1 Down syndrome cell adhesion molecule-like protein Dscam2 isoform X1 [Spodoptera litura]	XP_022837433.1	73.48	558	52	6	16	478	677	1233	0	787
maker-tulip_contig_175_pilon_pilon-augustus-gene-1.2-mRNA-1	XP_022837434.1 Down syndrome cell adhesion molecule-like protein Dscam2 isoform X2 [Spodoptera litura]	XP_022837434.1	99.22	128	1	0	1	128	1180	1307	6e-83	273
maker-tulip_contig_175_pilon_pilon-augustus-gene-1.3-mRNA-1	AKJ54492.1 attacin 2 [Spodoptera exigua]	AKJ54492.1	98.21	168	3	0	1	168	1	168	3e-116	338
maker-tulip_contig_175_pilon_pilon-augustus-gene-1.7-mRNA-1	AKJ54493.1 attacin 3 [Spodoptera exigua]	AKJ54493.1	96.17	235	9	0	1	235	1	235	3e-165	466
augustus_masked-tulip_contig_175_pilon_pilon-processed-gene-1.18-mRNA-1	XP_022837274.1 myb protein isoform X1 [Spodoptera litura]	XP_022837274.1	78	350	17	3	45	334	481	830	1e-179	528
maker-tulip_contig_175_pilon_pilon-augustus-gene-2.4-mRNA-1	XP_022837470.1 checkpoint protein HUS1 [Spodoptera litura]	XP_022837470.1	97.6	292	7	0	1	292	1	292	0	593
maker-tulip_contig_175_pilon_pilon-augustus-gene-2.5-mRNA-1	XP_022837442.1 nuclear pore glycoprotein p62-like [Spodoptera litura]	XP_022837442.1	76.46	769	78	15	1	679	1	756	0	895
maker-tulip_contig_175_pilon_pilon-augustus-gene-2.6-mRNA-1	XP_022837535.1 uncharacterized protein LOC111364747 isoform X2 [Spodoptera litura]	XP_022837535.1	98.26	115	2	0	20	134	321	435	3e-77	244
maker-tulip_contig_175_pilon_pilon-augustus-gene-2.7-mRNA-1	XP_022837536.1 uncharacterized protein LOC111364747 isoform X3 [Spodoptera litura]	XP_022837536.1	88.08	302	23	4	1	300	1	291	0	532
augustus_masked-tulip_contig_175_pilon_pilon-processed-gene-3.1-mRNA-1	XP_022815865.1 uncharacterized protein LOC111349122 [Spodoptera litura]	XP_022815865.1	89.87	79	8	0	1	79	1	79	9e-45	156
augustus_masked-tulip_contig_175_pilon_pilon-processed-gene-3.2-mRNA-1	XP_022815865.1 uncharacterized protein LOC111349122 [Spodoptera litura]	XP_022815865.1	84.87	238	36	0	1	238	103	340	7e-145	419
augustus_masked-tulip_contig_175_pilon_pilon-processed-gene-3.3-mRNA-1	PCG65197.1 hypothetical protein B5V51_9535, partial [Heliothis virescens]	PCG65197.1	96.31	271	10	0	1	271	1	271	3e-157	449
augustus_masked-tulip_contig_175_pilon_pilon-processed-gene-3.4-mRNA-1	JAG34795.1 Retrovirus-related Pol polyprotein from transposon TNT 1-94, partial [Lygus hesperus]	JAG34795.1	62.11	190	65	3	10	192	12	201	3e-70	231
maker-tulip_contig_175_pilon_pilon-augustus-gene-3.7-mRNA-1	XP_022837672.1 zwei Ig domain protein zig-8-like [Spodoptera litura]	XP_022837672.1	99.11	224	2	0	15	238	39	262	2e-164	467
augustus_masked-tulip_contig_175_pilon_pilon-processed-gene-3.6-mRNA-1	PCG66182.1 hypothetical protein B5V51_8061, partial [Heliothis virescens]	PCG66182.1	88.66	97	11	0	1	97	42	138	1e-55	181
maker-tulip_contig_175_pilon_pilon-augustus-gene-4.26-mRNA-1	XP_022837606.1 glucose dehydrogenase [FAD, quinone]-like isoform X1 [Spodoptera litura]	XP_022837606.1	91.5	541	45	1	1	541	254	793	0	1040
maker-tulip_contig_175_pilon_pilon-augustus-gene-4.27-mRNA-1	XP_022837607.1 glucose dehydrogenase [FAD, quinone]-like isoform X2 [Spodoptera litura]	XP_022837607.1	94.51	474	26	0	1	474	310	783	0	939
augustus_masked-tulip_contig_175_pilon_pilon-processed-gene-4.4-mRNA-1	AMY98414.1 chitin deacetylase 5, partial [Spodoptera exigua]	AMY98414.1	91.98	349	27	1	1	348	1	349	0	654
maker-tulip_contig_175_pilon_pilon-augustus-gene-4.42-mRNA-1	XP_022837307.1 m-AAA protease-interacting protein 1, mitochondrial [Spodoptera litura]	XP_022837307.1	86.89	244	9	1	1	221	1	244	3e-150	428
augustus_masked-tulip_contig_175_pilon_pilon-processed-gene-4.6-mRNA-1	PZC72976.1 hypothetical protein B5X24_HaOG210214 [Helicoverpa armigera]	PZC72976.1	82.47	97	17	0	1	97	29	125	1e-52	170
maker-tulip_contig_175_pilon_pilon-augustus-gene-4.43-mRNA-1	XP_022837334.1 structure-specific endonuclease subunit SLX4 [Spodoptera litura]	XP_022837334.1	77.74	1168	199	12	1	1122	1	1153	0	1777
augustus_masked-tulip_contig_175_pilon_pilon-processed-gene-4.8-mRNA-1	KOB74708.1 putative Impact [Operophtera brumata]	KOB74708.1	50.65	77	37	1	1	77	51	126	3e-17	79.3
maker-tulip_contig_175_pilon_pilon-augustus-gene-4.47-mRNA-1	XP_022837657.1 protein IMPACT-like [Spodoptera litura]	XP_022837657.1	56.88	269	97	1	1	250	1	269	9e-103	309
augustus_masked-tulip_contig_175_pilon_pilon-processed-gene-4.11-mRNA-1	XP_026748537.1 protein IMPACT-like [Galleria mellonella]	XP_026748537.1	55.88	34	15	0	23	56	179	212	5e-05	46.6
maker-tulip_contig_175_pilon_pilon-augustus-gene-4.48-mRNA-1	XP_022837657.1 protein IMPACT-like [Spodoptera litura]	XP_022837657.1	40.43	141	40	3	44	140	129	269	1e-20	92.8
augustus_masked-tulip_contig_175_pilon_pilon-processed-gene-4.17-mRNA-1	XP_022837218.1 uncharacterized protein LOC111364544 [Spodoptera litura]	XP_022837218.1	85.62	299	43	0	1	299	1	299	0	548
maker-tulip_contig_175_pilon_pilon-augustus-gene-4.54-mRNA-1	XP_022837289.1 protein Wnt-1-like isoform X2 [Spodoptera litura]	XP_022837289.1	98.51	335	5	0	7	341	25	359	0	687
maker-tulip_contig_175_pilon_pilon-augustus-gene-4.56-mRNA-1	XP_022837306.1 CDK-activating kinase assembly factor MAT1 [Spodoptera litura]	XP_022837306.1	98.71	309	4	0	1	309	1	309	0	625
maker-tulip_contig_175_pilon_pilon-augustus-gene-4.59-mRNA-1	XP_022837305.1 uncharacterized protein LOC111364613 [Spodoptera litura]	XP_022837305.1	92.41	145	11	0	148	292	210	354	5e-91	284
maker-tulip_contig_175_pilon_pilon-augustus-gene-4.60-mRNA-1	XP_022837657.1 protein IMPACT-like [Spodoptera litura]	XP_022837657.1	75.37	272	35	4	1	243	1	269	1e-140	405
maker-tulip_contig_175_pilon_pilon-augustus-gene-4.62-mRNA-1	XP_022837657.1 protein IMPACT-like [Spodoptera litura]	XP_022837657.1	63.94	269	97	0	1	269	1	269	3e-122	360
augustus_masked-tulip_contig_31_pilon_pilon-processed-gene-0.27-mRNA-1	XP_022824859.1 trichohyalin-like [Spodoptera litura]	XP_022824859.1	58.24	1523	437	31	1	1333	14	1527	0	1558
augustus_masked-tulip_contig_31_pilon_pilon-processed-gene-0.28-mRNA-1	PCG73702.1 hypothetical protein B5V51_14526 [Heliothis virescens]	PCG73702.1	87.56	209	25	1	69	277	153	360	8e-136	399
maker-tulip_contig_31_pilon_pilon-augustus-gene-0.0-mRNA-1	XP_026727671.1 proteasome subunit beta type-3 [Trichoplusia ni]	XP_026727671.1	97.07	205	0	1	1	199	1	205	2e-144	410
maker-tulip_contig_31_pilon_pilon-augustus-gene-0.2-mRNA-1	XP_022824582.1 very-long-chain (3R)-3-hydroxyacyl-CoA dehydratase [Spodoptera litura]	XP_022824582.1	97.57	371	9	0	1	371	1	371	0	750
augustus_masked-tulip_contig_31_pilon_pilon-processed-gene-0.31-mRNA-1	XP_022824701.1 uncharacterized protein LOC111355170 [Spodoptera litura]	XP_022824701.1	81.69	142	26	0	1	142	1	142	3e-81	248
augustus_masked-tulip_contig_31_pilon_pilon-processed-gene-0.32-mRNA-1	PZC85184.1 hypothetical protein B5X24_HaOG202369 [Helicoverpa armigera]	PZC85184.1	97.43	389	10	0	1	389	1	389	0	801
maker-tulip_contig_31_pilon_pilon-augustus-gene-0.6-mRNA-1	XP_022824676.1 phosphatidylinositol 5-phosphate 4-kinase type-2 alpha isoform X3 [Spodoptera litura]	XP_022824676.1	100	259	0	0	1	259	1	259	0	534
maker-tulip_contig_31_pilon_pilon-augustus-gene-0.9-mRNA-1	XP_022824534.1 NADH dehydrogenase [ubiquinone] 1 alpha subcomplex subunit 13 [Spodoptera litura]	XP_022824534.1	96.73	153	5	0	1	153	1	153	1e-105	308
maker-tulip_contig_31_pilon_pilon-augustus-gene-0.11-mRNA-1	XP_022824527.1 V-type proton ATPase subunit D-like [Spodoptera litura]	XP_022824527.1	94.67	169	9	0	1	169	1	169	2e-108	321
maker-tulip_contig_31_pilon_pilon-augustus-gene-0.12-mRNA-1	XP_022824525.1 mucin-2-like isoform X1 [Spodoptera litura]	XP_022824525.1	98.77	488	6	0	1	488	464	951	0	928
maker-tulip_contig_31_pilon_pilon-augustus-gene-0.13-mRNA-1	XP_022824526.1 mucin-3A-like isoform X2 [Spodoptera litura]	XP_022824526.1	99.51	411	2	0	1	411	1	411	0	806
augustus_masked-tulip_contig_31_pilon_pilon-processed-gene-0.37-mRNA-1	XP_021201105.1 OTU domain-containing protein 7B-like isoform X2 [Helicoverpa armigera]	XP_021201105.1	74.87	585	38	7	41	524	15	591	0	838
augustus_masked-tulip_contig_31_pilon_pilon-processed-gene-1.0-mRNA-1	KOB75930.1 Tumor necrosis factor, alpha-induced protein 8-like protein [Operophtera brumata]	KOB75930.1	54.36	149	9	2	1	90	1	149	5e-36	128
augustus_masked-tulip_contig_31_pilon_pilon-processed-gene-1.4-mRNA-1	XP_022204056.1 uncharacterized protein LOC111060695 [Nilaparvata lugens]	XP_022204056.1	40.68	59	34	1	1	59	1	58	0.0003	44.7
maker-tulip_contig_31_pilon_pilon-augustus-gene-1.36-mRNA-1	XP_022824751.1 fructose-1,6-bisphosphatase 1 [Spodoptera litura]	XP_022824751.1	85.16	337	8	1	144	438	1	337	0	578
maker-tulip_contig_31_pilon_pilon-augustus-gene-1.40-mRNA-1	PCG64706.1 hypothetical protein B5V51_10246 [Heliothis virescens]	PCG64706.1	60.43	1150	366	29	19	1111	6	1123	0	1141
augustus_masked-tulip_contig_31_pilon_pilon-processed-gene-1.7-mRNA-1	XP_022824643.1 NAD-dependent protein deacetylase Sirt6 [Spodoptera litura]	XP_022824643.1	88.08	369	19	2	1	345	1	368	0	637
maker-tulip_contig_31_pilon_pilon-augustus-gene-1.43-mRNA-1	XP_026729233.1 uncharacterized protein LOC113494913 [Trichoplusia ni]	XP_026729233.1	48.38	277	120	4	99	355	5	278	9e-73	243
maker-tulip_contig_31_pilon_pilon-augustus-gene-1.44-mRNA-1	JAV65003.1 hypothetical protein, partial [Photinus pyralis]	JAV65003.1	55.04	278	125	0	88	365	250	527	2e-111	346
augustus_masked-tulip_contig_31_pilon_pilon-processed-gene-1.10-mRNA-1	XP_022824641.1 aldehyde dehydrogenase, mitochondrial-like [Spodoptera litura]	XP_022824641.1	85.29	204	16	1	17	206	306	509	1e-116	351
maker-tulip_contig_31_pilon_pilon-augustus-gene-1.47-mRNA-1	XP_022824783.1 centrosomal protein of 120 kDa-like [Spodoptera litura]	XP_022824783.1	76.85	203	18	1	279	452	615	817	1e-89	300
augustus_masked-tulip_contig_31_pilon_pilon-processed-gene-1.12-mRNA-1	XP_026740960.1 ubiquitin-conjugating enzyme E2 J2-like [Trichoplusia ni]	XP_026740960.1	94.67	225	12	0	1	225	1	225	3e-159	450
augustus_masked-tulip_contig_31_pilon_pilon-processed-gene-1.13-mRNA-1	XP_022824915.1 uncharacterized protein LOC111355337 [Spodoptera litura]	XP_022824915.1	94.59	333	17	1	1	332	1	333	0	589
maker-tulip_contig_31_pilon_pilon-augustus-gene-1.49-mRNA-1	XP_024869640.1 T-complex protein 1 subunit gamma [Temnothorax curvispinosus]	XP_024869640.1	66.85	543	110	5	1	473	1	543	0	715
maker-tulip_contig_31_pilon_pilon-augustus-gene-1.52-mRNA-1	XP_022824892.1 uncharacterized protein LOC111355327 [Spodoptera litura]	XP_022824892.1	95.53	447	17	2	1	445	1	446	0	793
augustus_masked-tulip_contig_31_pilon_pilon-processed-gene-1.17-mRNA-1	XP_022824703.1 zinc finger protein basonuclin-2-like [Spodoptera litura]	XP_022824703.1	97.15	421	12	0	100	520	1	421	0	843
augustus_masked-tulip_contig_31_pilon_pilon-processed-gene-1.18-mRNA-1	XP_022824703.1 zinc finger protein basonuclin-2-like [Spodoptera litura]	XP_022824703.1	99.53	213	1	0	1	213	491	703	6e-148	438
maker-tulip_contig_31_pilon_pilon-augustus-gene-1.55-mRNA-1	XP_026736451.1 uncharacterized protein LOC113500008 [Trichoplusia ni]	XP_026736451.1	95.1	102	5	0	1	102	1	102	2e-61	203
maker-tulip_contig_31_pilon_pilon-augustus-gene-1.57-mRNA-1	XP_022824607.1 uncharacterized protein LOC111355111 [Spodoptera litura]	XP_022824607.1	79.44	214	42	1	1	212	1	214	1e-123	359
maker-tulip_contig_31_pilon_pilon-augustus-gene-1.59-mRNA-1	XP_026741139.1 synaptotagmin-4-like [Trichoplusia ni]	XP_026741139.1	98.62	145	2	0	1	145	53	197	5e-101	298
maker-tulip_contig_31_pilon_pilon-augustus-gene-1.60-mRNA-1	XP_022824584.1 synaptotagmin-6 isoform X2 [Spodoptera litura]	XP_022824584.1	96	125	5	0	14	138	174	298	7e-80	249
maker-tulip_contig_31_pilon_pilon-augustus-gene-1.64-mRNA-1	PCG72352.1 hypothetical protein B5V51_891 [Heliothis virescens]	PCG72352.1	99.65	284	1	0	1	284	1	284	0	540
maker-tulip_contig_31_pilon_pilon-augustus-gene-1.70-mRNA-1	OWR49734.1 tropomyosin-2 isoform 1 [Danaus plexippus plexippus]	OWR49734.1	96.67	30	1	0	80	109	15	44	6e-11	61.2
maker-tulip_contig_31_pilon_pilon-augustus-gene-1.74-mRNA-1	XP_022824400.1 tropomyosin-2 isoform X8 [Spodoptera litura]	XP_022824400.1	90.91	55	5	0	88	142	258	312	1e-22	106
maker-tulip_contig_31_pilon_pilon-augustus-gene-1.75-mRNA-1	KPJ15811.1 Tropomyosin, muscle [Papilio machaon]	KPJ15811.1	83.23	155	5	1	1	134	1	155	3e-77	235
maker-tulip_contig_31_pilon_pilon-augustus-gene-1.72-mRNA-1	OWR49731.1 Tropomyosin [Danaus plexippus plexippus]	OWR49731.1	89.09	220	13	2	1	219	1	210	8e-123	357
augustus_masked-tulip_contig_31_pilon_pilon-processed-gene-1.25-mRNA-1	XP_022824394.1 tropomyosin-1, isoforms 33/34 isoform X2 [Spodoptera litura]	XP_022824394.1	96.68	211	6	1	1	210	1	211	2e-144	428
maker-tulip_contig_31_pilon_pilon-augustus-gene-1.93-mRNA-1	XP_022824513.1 mortality factor 4-like protein 1 [Spodoptera litura]	XP_022824513.1	99.7	334	1	0	1	334	1	334	0	691
maker-tulip_contig_31_pilon_pilon-augustus-gene-1.95-mRNA-1	RVE54259.1 hypothetical protein evm_001086 [Chilo suppressalis]	RVE54259.1	93.02	86	2	1	2	83	236	321	6e-49	166
maker-tulip_contig_31_pilon_pilon-augustus-gene-1.96-mRNA-1	RVE54259.1 hypothetical protein evm_001086 [Chilo suppressalis]	RVE54259.1	95.5	111	5	0	15	125	17	127	8e-70	221
augustus_masked-tulip_contig_31_pilon_pilon-processed-gene-1.29-mRNA-1	XP_022824386.1 nuclear cap-binding protein subunit 1 [Spodoptera litura]	XP_022824386.1	99.6	496	2	0	1	496	1	496	0	1037
maker-tulip_contig_31_pilon_pilon-augustus-gene-1.98-mRNA-1	XP_022824642.1 dolichol kinase [Spodoptera litura]	XP_022824642.1	81.74	449	79	2	1	447	1	448	0	751
augustus_masked-tulip_contig_31_pilon_pilon-processed-gene-1.31-mRNA-1	XP_022824638.1 uncharacterized protein LOC111355127 isoform X1 [Spodoptera litura]	XP_022824638.1	85.19	999	103	2	26	979	34	1032	0	1734
augustus_masked-tulip_contig_31_pilon_pilon-processed-gene-1.32-mRNA-1	XP_022824302.1 centrosome-associated zinc finger protein CP190 [Spodoptera litura]	XP_022824302.1	82.55	1450	239	10	1	1443	1	1443	0	2397
augustus_masked-tulip_contig_135_pilon_pilon-processed-gene-0.3-mRNA-1	PCG65091.1 hypothetical protein B5V51_9719, partial [Heliothis virescens]	PCG65091.1	90	80	8	0	1	80	31	110	9e-46	152
maker-tulip_contig_135_pilon_pilon-augustus-gene-0.0-mRNA-1	XP_022830280.1 uncharacterized protein LOC111359073 [Spodoptera litura]	XP_022830280.1	87.41	572	32	2	1	532	907	1478	0	1037
augustus_masked-tulip_contig_81_pilon_pilon-processed-gene-0.0-mRNA-1	XP_022822543.1 uncharacterized protein LOC111353678 [Spodoptera litura]	XP_022822543.1	57.14	189	81	0	1	189	94	282	8e-70	226
maker-tulip_contig_81_pilon_pilon-augustus-gene-0.26-mRNA-1	XP_022831629.1 homeobox protein cut isoform X7 [Spodoptera litura]	XP_022831629.1	98.1	946	12	2	16	958	252	1194	0	1906
augustus_masked-tulip_contig_81_pilon_pilon-processed-gene-0.4-mRNA-1	RVE54882.1 hypothetical protein evm_000249 [Chilo suppressalis]	RVE54882.1	64.04	114	39	1	38	151	37	148	2e-40	149
augustus_masked-tulip_contig_81_pilon_pilon-processed-gene-0.5-mRNA-1	RVE54882.1 hypothetical protein evm_000249 [Chilo suppressalis]	RVE54882.1	79.92	249	49	1	13	261	136	383	6e-149	434
maker-tulip_contig_81_pilon_pilon-augustus-gene-0.28-mRNA-1	XP_021183801.1 GPN-loop GTPase 3 [Helicoverpa armigera]	XP_021183801.1	90.32	186	18	0	1	186	1	186	6e-119	349
maker-tulip_contig_81_pilon_pilon-augustus-gene-0.30-mRNA-1	XP_022831380.1 14-3-3 protein epsilon [Spodoptera litura]	XP_022831380.1	100	262	0	0	1	262	1	262	0	540
maker-tulip_contig_81_pilon_pilon-augustus-gene-0.33-mRNA-1	XP_022831514.1 LOW QUALITY PROTEIN: ubiquitin carboxyl-terminal hydrolase 32 [Spodoptera litura]	XP_022831514.1	98.21	279	5	0	1	279	1	279	0	568
maker-tulip_contig_81_pilon_pilon-augustus-gene-0.34-mRNA-1	PCG63636.1 hypothetical protein B5V51_11964, partial [Heliothis virescens]	PCG63636.1	87.79	172	17	2	1	172	105	272	5e-90	275
maker-tulip_contig_81_pilon_pilon-augustus-gene-0.35-mRNA-1	XP_022831514.1 LOW QUALITY PROTEIN: ubiquitin carboxyl-terminal hydrolase 32 [Spodoptera litura]	XP_022831514.1	66.4	381	82	8	44	405	658	1011	4e-142	452
maker-tulip_contig_81_pilon_pilon-augustus-gene-0.36-mRNA-1	XP_022831514.1 LOW QUALITY PROTEIN: ubiquitin carboxyl-terminal hydrolase 32 [Spodoptera litura]	XP_022831514.1	87.23	595	59	5	7	590	1094	1682	0	1003
augustus_masked-tulip_contig_81_pilon_pilon-processed-gene-0.14-mRNA-1	XP_022831354.1 major heat shock 70 kDa protein Ab-like [Spodoptera litura]	XP_022831354.1	96.49	627	22	0	1	627	1	627	0	1256
augustus_masked-tulip_contig_81_pilon_pilon-processed-gene-0.15-mRNA-1	XP_022837599.1 uncharacterized protein LOC111364790 [Spodoptera litura]	XP_022837599.1	75.82	244	54	2	227	468	382	622	5e-123	392
augustus_masked-tulip_contig_81_pilon_pilon-processed-gene-0.16-mRNA-1	XP_022831353.1 PHD finger protein 12 [Spodoptera litura]	XP_022831353.1	91.63	263	14	1	1	255	1	263	2e-163	488
maker-tulip_contig_81_pilon_pilon-augustus-gene-0.55-mRNA-1	AVK59444.1 Pasha-PB [Spodoptera frugiperda]	AVK59444.1	98.5	133	2	0	1	133	397	529	3e-86	270
augustus_masked-tulip_contig_81_pilon_pilon-processed-gene-0.18-mRNA-1	KOB68075.1 hypothetical protein OBRU01_19060 [Operophtera brumata]	KOB68075.1	64.41	222	78	1	1	221	237	458	7e-109	332
augustus_masked-tulip_contig_81_pilon_pilon-processed-gene-0.19-mRNA-1	PZC71610.1 hypothetical protein B5X24_HaOG212888 [Helicoverpa armigera]	PZC71610.1	55.01	449	198	2	11	459	67	511	7e-175	533
maker-tulip_contig_81_pilon_pilon-augustus-gene-0.57-mRNA-1	XP_022831748.1 microprocessor complex subunit DGCR8 [Spodoptera litura]	XP_022831748.1	87.16	584	61	5	1	582	1	572	0	1024
augustus_masked-tulip_contig_81_pilon_pilon-processed-gene-0.22-mRNA-1	XP_022831517.1 BRCA1-associated protein [Spodoptera litura]	XP_022831517.1	87.61	549	14	2	1	495	1	549	0	965
maker-tulip_contig_81_pilon_pilon-augustus-gene-0.72-mRNA-1	XP_022831516.1 glucose dehydrogenase [FAD, quinone] [Spodoptera litura]	XP_022831516.1	97.08	582	14	1	1	579	55	636	0	1180
maker-tulip_contig_81_pilon_pilon-augustus-gene-1.0-mRNA-1	XP_022831875.1 alpha-tocopherol transfer protein-like [Spodoptera litura]	XP_022831875.1	84.15	265	15	2	1	238	5	269	2e-156	445
maker-tulip_contig_81_pilon_pilon-augustus-gene-1.3-mRNA-1	PCG80028.1 hypothetical protein B5V51_12144 [Heliothis virescens]	PCG80028.1	65.82	79	27	0	48	126	6	84	6e-26	117
maker-tulip_contig_81_pilon_pilon-augustus-gene-1.4-mRNA-1	XP_022831810.1 clavesin-1-like [Spodoptera litura]	XP_022831810.1	90.42	261	8	1	10	253	42	302	1e-168	478
augustus_masked-tulip_contig_81_pilon_pilon-processed-gene-1.28-mRNA-1	XP_022831735.1 clavesin-1-like [Spodoptera litura]	XP_022831735.1	96.35	301	9	1	1	299	1	301	0	592
maker-tulip_contig_81_pilon_pilon-augustus-gene-1.8-mRNA-1	XP_022832182.1 potassium channel subfamily K member 15 [Spodoptera litura]	XP_022832182.1	98.4	312	5	0	1	312	1	312	0	629
augustus_masked-tulip_contig_81_pilon_pilon-processed-gene-1.30-mRNA-1	KOB63196.1 Uncharacterized protein OBRU01_24926 [Operophtera brumata]	KOB63196.1	96.43	56	2	0	1	56	1	56	8e-33	121
augustus_masked-tulip_contig_81_pilon_pilon-processed-gene-1.31-mRNA-1	KOB63196.1 Uncharacterized protein OBRU01_24926 [Operophtera brumata]	KOB63196.1	100	93	0	0	49	141	86	178	4e-61	197
maker-tulip_contig_81_pilon_pilon-augustus-gene-1.10-mRNA-1	XP_022832131.1 carboxypeptidase B-like [Spodoptera litura]	XP_022832131.1	83.69	331	54	0	29	359	100	430	0	583
maker-tulip_contig_81_pilon_pilon-augustus-gene-1.13-mRNA-1	XP_022832131.1 carboxypeptidase B-like [Spodoptera litura]	XP_022832131.1	78.67	436	74	2	16	440	1	428	0	762
maker-tulip_contig_81_pilon_pilon-augustus-gene-1.20-mRNA-1	XP_026740513.1 cuticle protein 16.8-like [Trichoplusia ni]	XP_026740513.1	85.79	183	26	0	1	183	1	183	7e-102	301
[truncated: 16,233 more rows]
